# Supplementary material for: Characterization and analysis of long non-coding rna (lncRNA) in In Vitro- and Ex Vivo-derived cardiac progenitor cells
Source: PubMed Central journal article supplement (PMC5481004; doi:10.1371/journal.pone.0180096), 2017-06-22

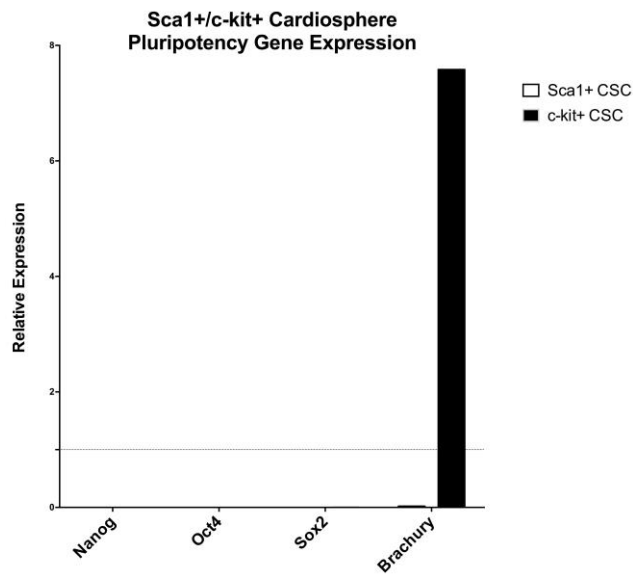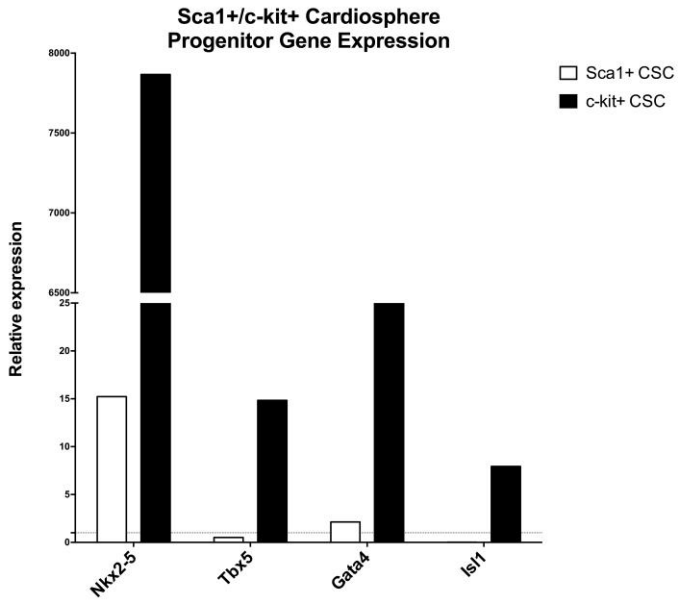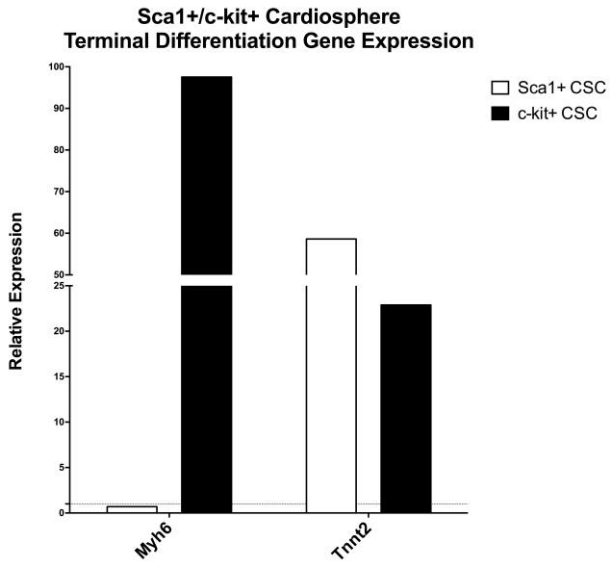

Supplement: pone.0180096.s002.pdf [file pone.0180096.s002.pdf]
