# Supplementary material for: Characterization and analysis of long non-coding rna (lncRNA) in In Vitro- and Ex Vivo-derived cardiac progenitor cells
Source: PLoS One. 2017 Jun 22;12(6):e0180096. doi: 10.1371/journal.pone.0180096 (PMC5481004; doi:10.1371/journal.pone.0180096)
Supplement: S1 Table — that were determined to be differentially expressed in an alternative model for in vitro, cardiac-directed ES cell differentiation. The adjacent right column indicates which, if either, of the d8 EmGFP+/CLK CPCs also exhibited differential expression in these lncRNA genes and, if so, in what directional capacity (i.e.–increased or decreased) relative to undifferentiated ES cells. (XLSX) [file pone.0180096.s003.xlsx]

## Sheet: RNA-Seq LncRNA comparison
lncEnsGeneID	d8/CLK CPC expression up or down	lncSymb	lncChrom	lncStart	lncEnd
ENSMUSG00000085650	c-kit down ; d8EmGFP unchanged	2310010J17Rik	chr7	97273368	97277984
ENSMUSG00000073236	c-kit down ; d8EmGFP unchanged	2500004C02Rik	chr2	153166893	153171809
ENSMUSG00000087138	c-kit down ; d8EmGFP unchanged	Gm15545	chr7	52242270	52249967
ENSMUSG00000086082	c-kit down ; d8EmGFP up	1700113A16Rik	chr3	87975482	87981707
ENSMUSG00000085396	c-kit down ; d8EmGFP up	6720401G13Rik	chrX	47908921	47988498
ENSMUSG00000072591	c-kit down ; d8EmGFP up	5930412G12Rik	chr5	129084981	129106568
ENSMUSG00000043419	c-kit down ; d8EmGFP up	A030009H04Rik	chr11	69153963	69156143
ENSMUSG00000021268	c-kit down ; d8EmGFP up	Meg3	chr12	110779211	110809936
ENSMUSG00000006638	c-kit down ; d8EmGFP up	Abhd1	chr5	31252439	31257464
ENSMUSG00000073155	c-kit down ; d8EmGFP up	1810058I24Rik	chr6	35202654	35213496
ENSMUSG00000085218	c-kit down ; d8EmGFP up	BB218582	chr2	106483071	106490521
ENSMUSG00000085850	c-kit down ; d8EmGFP up	4833412C05Rik	chr7	74929611	74948382
ENSMUSG00000086968	c-kit down ; d8EmGFP up	4933431E20Rik	chr3	107691768	107699131
ENSMUSG00000042922	c-kit no change ; d8EmGFP decreased	D130020L05Rik	chr12	102320691	102327137
ENSMUSG00000086877	c-kit no change ; d8EmGFP up	A230072C01Rik	chrX	20538810	20563863
ENSMUSG00000086126	c-kit no change ; d8EmGFP up	5730457N03Rik	chr6	52258383	52264826
ENSMUSG00000086988	c-kit no change ; d8EmGFP up	1700086O06Rik	chr18	38398059	38410219
ENSMUSG00000055897	c-kit no change ; d8EmGFP up	Ppp4r1l-ps	chr2	173404821	173485141
ENSMUSG00000087177	c-kit no change ; d8EmGFP up	E130307A14Rik	chr10	39341218	39451813
ENSMUSG00000024893	c-kit no change ; d8EmGFP up	2700046G09Rik	chr19	32463706	32465674
ENSMUSG00000033209	c-kit no change ; d8EmGFP up	Ttc28	chr5	111308822	111718800
ENSMUSG00000087543	c-kit no change ; d8EmGFP up	Gm16576	chr15	79573128	79587824
ENSMUSG00000055963	c-kit no change ; d8EmGFP up	Gm11818	chr4	12833985	12908618
ENSMUSG00000059277	c-kit no change ; d8EmGFP up	R74862	chr7	150207689	150239591
ENSMUSG00000087128	c-kit up ; d8EmGFP down	Gm12655	chr4	94127622	94143871
ENSMUSG00000072566	c-kit up; d8EmGFP unchanged	Pvt1	chr15	61869542	62209651
ENSMUSG00000085492	c-kit up; d8EmGFP unchanged	Trmt61b	chr17	71906367	71948095
ENSMUSG00000086370	c-kit up; d8EmGFP unchanged	B230206F22Rik	chrX	100756246	100819093
ENSMUSG00000072494	c-kit up; d8EmGFP unchanged	Ppp1r3e	chr14	55491518	55496375
ENSMUSG00000086579	c-kit up; d8EmGFP unchanged	A930012L18Rik	chr18	44821319	44835925
ENSMUSG00000086651	c-kit up; d8EmGFP unchanged	1300002E11Rik	chr16	21794420	21809110
ENSMUSG00000085929	both d8EmGFP and c-kit down	Gm13421	chr2	27395946	27398882
ENSMUSG00000085011	both d8EmGFP and c-kit down	Gm16880	chr1	138592788	138622305
ENSMUSG00000085773	both d8EmGFP and c-kit down	Gm16233	chr3	144610525	144617842
ENSMUSG00000086748	both d8EmGFP and c-kit down	Gm13261	chr2	10260910	10295668
ENSMUSG00000086878	both d8EmGFP and c-kit down	Miat	chr5	112642248	112657968
ENSMUSG00000085671	both d8EmGFP and c-kit down	C330046G13Rik	chr10	84010162	84016083
ENSMUSG00000086810	both d8EmGFP and c-kit down	Gm13110	chr4	154019863	154029427
ENSMUSG00000087474	both d8EmGFP and c-kit down	Gm12100	chr11	30650832	30656147
ENSMUSG00000087655	both d8EmGFP and c-kit down	Gm5091	chr17	15368549	15377747
ENSMUSG00000085490	both d8EmGFP and c-kit down	4930526L06Rik	chr19	11271307	11374376
ENSMUSG00000086454	both d8EmGFP and c-kit down	4930500J02Rik	chr2	104399320	104411586
ENSMUSG00000086516	both d8EmGFP and c-kit down	4930461G14Rik	chr9	58302980	58317430
ENSMUSG00000087169	both d8EmGFP and c-kit down	C330002G04Rik	chr19	23111880	23150343
ENSMUSG00000054418	both d8EmGFP and c-kit down	2900041M22Rik	chr11	117472561	117475171
ENSMUSG00000085974	both d8EmGFP and c-kit down	4930444M15Rik	chr14	76914365	76920662
ENSMUSG00000086503	both d8EmGFP and c-kit down	Xist	chrX	100655714	100678556
ENSMUSG00000086802	both d8EmGFP and c-kit down	2700038G22Rik	chr5	23356415	23360742
ENSMUSG00000046808	both d8EmGFP and c-kit down	Atp10d	chr5	72594568	72690014
ENSMUSG00000085062	both d8EmGFP and c-kit down	4933404O12Rik	chr5	137395016	137412982
ENSMUSG00000063018	both d8EmGFP and c-kit down	2010204K13Rik	chrX	6988943	7022269
ENSMUSG00000085555	both d8EmGFP and c-kit down	2610035F20Rik	chr14	122869506	122872801
ENSMUSG00000086015	both d8EmGFP and c-kit down	4833417C18Rik	chr11	95720179	95722358
ENSMUSG00000085860	both d8EmGFP and c-kit down	2410003L11Rik	chr11	97459825	97484207
ENSMUSG00000085814	both d8EmGFP and c-kit down	1810014B01Rik	chr10	86148346	86157551
ENSMUSG00000073393	both d8EmGFP and c-kit down	B230354K17Rik	chr17	45570801	45579493
ENSMUSG00000074284	both d8EmGFP and c-kit down	Gm10658	chr9	56904437	56919773
ENSMUSG00000072844	both d8EmGFP and c-kit down	G530011O06Rik	chrX	166412975	166416849
ENSMUSG00000074136	both d8EmGFP and c-kit down	4930513N10Rik	chr8	98330730	98345628
ENSMUSG00000056735	both d8EmGFP and c-kit down	A930024E05Rik	chr5	123439363	123448354
ENSMUSG00000085741	both d8EmGFP and c-kit down	5430405H02Rik	chr2	156668864	156688699
ENSMUSG00000086807	both d8EmGFP and c-kit down	C330013F16Rik	chrX	135774765	135892277
ENSMUSG00000044730	both d8EmGFP and c-kit down	9930104L06Rik	chr4	124614292	124621900
ENSMUSG00000085283	both d8EmGFP and c-kit down	9530027J09Rik	chrX	45629969	45638603
ENSMUSG00000086276	both d8EmGFP and c-kit down	2500002B13Rik	chr8	59966851	59987674
ENSMUSG00000087135	both d8EmGFP and c-kit increased	Gm16096	chr9	40588825	40592264
ENSMUSG00000032424	both d8EmGFP and c-kit increased	Snhg5	chr9	88415894	88417721
ENSMUSG00000059659	both d8EmGFP and c-kit increased	Gm10069	chr6	128388775	128425635
ENSMUSG00000085156	both d8EmGFP and c-kit increased	Gm11974	chr11	6425594	6428763
ENSMUSG00000086252	both d8EmGFP and c-kit increased	C030044B11Rik	chr13	49063656	49067400
ENSMUSG00000056579	both d8EmGFP and c-kit increased	Tug1	chr11	3539797	3548815
ENSMUSG00000084877	both d8EmGFP and c-kit increased	5430416N02Rik	chr5	100849861	100858535
ENSMUSG00000086985	both d8EmGFP and c-kit increased	Gm16973	chr14	57315117	57320105
ENSMUSG00000053332	both d8EmGFP and c-kit increased	Gas5	chr1	162964553	162968670
ENSMUSG00000085385	both d8EmGFP and c-kit increased	9430008C03Rik	chr2	158181043	158187316
ENSMUSG00000052248	both d8EmGFP and c-kit increased	Gm13476	chr2	44966658	44969607
ENSMUSG00000087156	both d8EmGFP and c-kit increased	1110050K14Rik	chr8	123578782	123606932
ENSMUSG00000034587	both d8EmGFP and c-kit increased	8430429K09Rik	chr11	3352368	3379834
ENSMUSG00000045327	both d8EmGFP and c-kit increased	6330549D23Rik	chr3	96410582	96433743
ENSMUSG00000085037	both d8EmGFP and c-kit increased	4933421O10Rik	chr4	33114117	33118298
ENSMUSG00000086429	both d8EmGFP and c-kit increased	Gt(ROSA)26Sor	chr6	113017422	113027327
ENSMUSG00000086488	both d8EmGFP and c-kit increased	1600020E01Rik	chr6	86476265	86514436
ENSMUSG00000087497	both d8EmGFP and c-kit increased	2810001G20Rik	chr11	63892986	63896761
ENSMUSG00000087687	both d8EmGFP and c-kit increased	2900053A13Rik	chr8	3621575	3624227
ENSMUSG00000075389	both d8EmGFP and c-kit increased	2810410L24Rik	chr11	120046714	120051166
ENSMUSG00000084957	both d8EmGFP and c-kit increased	Bbip1	chr19	54003757	54019117
ENSMUSG00000084972	both d8EmGFP and c-kit increased	9030407P20Rik	chr7	127816953	127821074
ENSMUSG00000087060	both d8EmGFP and c-kit increased	2810442I21Rik	chr11	16835157	16851285
ENSMUSG00000087396	both d8EmGFP and c-kit increased	4933407K13Rik	chrX	72952271	73010038
ENSMUSG00000087274	both d8EmGFP and c-kit increased	1010001N08Rik	chr18	11049085	11052565
ENSMUSG00000074649	both d8EmGFP and c-kit increased	BC029722	chr2	155643466	155645162
ENSMUSG00000085438	both d8EmGFP and c-kit increased	1700020I14Rik	chr2	119420033	119433238
ENSMUSG00000085622	both d8EmGFP and c-kit increased	3110056K07Rik	chr12	72092602	72116819
ENSMUSG00000085219	both d8EmGFP and c-kit increased	Gm16617	chr14	52606064	52608504
ENSMUSG00000059937	both d8EmGFP and c-kit increased	Gdap10	chr12	33506737	33511769
ENSMUSG00000078247	both d8EmGFP and c-kit increased	Airn	chr17	12934177	13052988
ENSMUSG00000087365	both d8EmGFP and c-kit increased	C430049B03Rik	chrX	50408223	50410367
ENSMUSG00000085644	both d8EmGFP and c-kit increased	2310015A10Rik	chr12	81221535	81233831
ENSMUSG00000087590	both d8EmGFP and c-kit increased	2410004N09Rik	chr18	33954575	33955640
ENSMUSG00000072893	both d8EmGFP and c-kit increased	4933439C10Rik	chr11	59319164	59327149
ENSMUSG00000075118	both d8EmGFP and c-kit increased	Gpr137b-ps	chr13	12711351	12742564
ENSMUSG00000086841	both d8EmGFP and c-kit increased	2410006H16Rik	chr11	62416379	62418309
ENSMUSG00000087574	both d8EmGFP and c-kit increased	C030037D09Rik	chr11	88579959	88590207
ENSMUSG00000085457	both d8EmGFP and c-kit increased	1110046J04Rik	chr13	34027689	34028499
ENSMUSG00000087269	both d8EmGFP and c-kit increased	D330023K18Rik	chr2	31001977	31007811
ENSMUSG00000087626	both d8EmGFP and c-kit increased	Gm15050	chr6	52122880	52124058
ENSMUSG00000086033	both d8EmGFP and c-kit increased	2900076A07Rik	chr7	88673678	88676365
ENSMUSG00000086290	both d8EmGFP and c-kit increased	Snhg12	chr4	131864593	131866939
ENSMUSG00000084931	no change	1110019D14Rik	chr6	13821526	13994373
ENSMUSG00000087676	no change	9230114K14Rik	chr5	52581920	52589223
ENSMUSG00000087161	no change	Gm16845	chr9	21875476	21890566
ENSMUSG00000086537	no change	Nespas	chr2	174106738	174120937
ENSMUSG00000085236	no change	2610206C17Rik	chr7	91838150	91925059
ENSMUSG00000086241	no change	4930483K19Rik	chr10	76008616	76024971
ENSMUSG00000073442	no change	Gm16386	chr17	22921765	22954708
ENSMUSG00000086597	no change	F420014N23Rik	chr10	126632305	126639699
ENSMUSG00000085936	no change	2610307P16Rik	chr13	28551903	28977489
ENSMUSG00000084808	no change	9430091E24Rik	chr8	113652786	113669380
ENSMUSG00000085912	no change	Gm16197	chr17	29194419	29215906
ENSMUSG00000086351	no change	6230400D17Rik	chr14	21506458	21522234
ENSMUSG00000086456	no change	Gm16861	chr16	4935048	4939585
ENSMUSG00000087566	no change	C920006O11Rik	chr9	78023721	78026686
ENSMUSG00000086967	no expression in any sample	4930566F21Rik	chr5	31789002	31797552
ENSMUSG00000085715	no expression in any sample	Tsix	chrX	100626856	100680296
ENSMUSG00000085140	no expression in any sample	Gm2155	chrX	53624797	53627967
ENSMUSG00000085214	no expression in any sample	0610005C13Rik	chr7	52823165	52830697
ENSMUSG00000087211	no expression in any sample	1500016L03Rik	chr11	84339162	84349333
ENSMUSG00000085286	no expression in any sample	1700121F15Rik	chr4	148708748	148710006
ENSMUSG00000086181	no expression in any sample	C230034O21Rik	chr3	38773492	38787181
ENSMUSG00000086496	no expression in any sample	Gm14204	chr2	158421208	158436459
ENSMUSG00000085462	no expression in any sample	5031434O11Rik	chr3	51363679	51371039
ENSMUSG00000086918	no expression in any sample	4930429F24Rik	chr9	79641448	79651042
ENSMUSG00000085597	no expression in any sample	4932441J04Rik	chr5	57961321	58109158
ENSMUSG00000086897	no expression in any sample	4632428C04Rik	chr16	30008753	30021516
ENSMUSG00000085162	no expression in any sample	Gm12295	chr11	65091156	65101335
ENSMUSG00000073493	unknown	Gm17286	chr5	37429403	37432885
ENSMUSG00000087105	unknown	Gm16952	chr17	71094669	71104922
ENSMUSG00000087580	unknown	Gm16869	chr9	3000282	3038313
ENSMUSG00000085337	unknown	Gm15964	chr16	91611713	91624106
ENSMUSG00000087528	unknown	9830144P21Rik	chr2	129031694	129056315
ENSMUSG00000085669	unknown	Gm14817	chrX	71040554	71042955
ENSMUSG00000084998	unknown	Gm16279	chr17	36033891	36049160
ENSMUSG00000087026	unknown	A230103J11Rik	chr8	87577059	87584359
ENSMUSG00000087558	unknown	1700030G06Rik	chr5	22056255	22313668
ENSMUSG00000085687	unknown	Gm16153	chr10	5923172	5937508
ENSMUSG00000086723	unknown	Gm16601	chr6	71911139	71913769
ENSMUSG00000087696	unknown	Gm16957	chr17	17526907	17532267
ENSMUSG00000087501	unknown	Gm12116	chr11	33104055	33121477
ENSMUSG00000085988	unknown	Gm16896	chr6	89254624	89277615
ENSMUSG00000053263	unknown	Gm12592	chr11	3205429	3231181
ENSMUSG00000086285	unknown	D630044L22Rik	chr17	26088417	26100555
ENSMUSG00000013989	unknown	D430018E03Rik	chr5	143635756	143640052
ENSMUSG00000085956	unknown	4930481B07Rik	chr3	94819547	94824060
ENSMUSG00000073415	unknown	Gm10501	chr17	35113844	35118733
ENSMUSG00000086725	unknown	A630052C17Rik	chr11	29070909	29073558
ENSMUSG00000086780	unknown	Gm16707	chr9	119349396	119353948
ENSMUSG00000087288	unknown	Gm13061	chr4	133574062	133575784
ENSMUSG00000086294	unknown	Gm16765	chr19	40663925	40669352
ENSMUSG00000034764	unknown	1700006J14Rik	chr10	119801213	119821392
ENSMUSG00000043993	unknown	2900052L18Rik	chr11	120091116	120092899
ENSMUSG00000053666	unknown	Gm9917	chr9	107461141	107470746
ENSMUSG00000084866	unknown	A930006K02Rik	chr16	91465349	91470366
ENSMUSG00000087502	unknown	Gm16091	chr8	74671500	74684754
ENSMUSG00000086266	unknown	Igf2as	chr7	149845598	149856261
ENSMUSG00000087165	unknown	2010001A14Rik	chr11	57609001	57614919
ENSMUSG00000085373	unknown	B130046B21Rik	chr15	98637463	98646508
ENSMUSG00000086058	unknown	Gm12575	chr11	82738405	82746884
ENSMUSG00000087126	unknown	1700109K24Rik	chr15	76914873	76926744
ENSMUSG00000085137	unknown	Gm16740	chr3	95021379	95030580
ENSMUSG00000084886	unknown	4732487G21Rik	chr12	87631711	87646956
ENSMUSG00000085916	unknown	Gm16724	chr17	71227418	71742624
ENSMUSG00000085088	unknown	4931413K12Rik	chr11	75403167	75408273
ENSMUSG00000074933	unknown	Gm17719	chr7	116094268	116105049
ENSMUSG00000085243	unknown	4930480K23Rik	chr14	70132591	70166920
ENSMUSG00000085945	unknown	2310014F06Rik	chr7	119756982	119823572
ENSMUSG00000084915	unknown	C230037L18Rik	chr15	89306667	89315278
ENSMUSG00000085446	unknown	A430046D13Rik	chr10	127936420	127941298
ENSMUSG00000085906	unknown	Gm16882	chr18	37906213	37927896
ENSMUSG00000085268	unknown	5033428I22Rik	chr8	59810915	59819479
ENSMUSG00000086003	unknown	B230206L02Rik	chr11	93994799	94017090
ENSMUSG00000073478	unknown	D730003I15Rik	chr1	193048353	193049565
ENSMUSG00000085769	unknown	D230017M19Rik	chr1	72283039	72321443
ENSMUSG00000085778	unknown	Gm16892	chr16	57167514	57174526
ENSMUSG00000086477	unknown	Gm15506	chr7	105830846	105851438
ENSMUSG00000087700	unknown	Gm15283	chr12	75027468	75050772
ENSMUSG00000086983	unknown	Gm16972	chr4	43058906	43066125
ENSMUSG00000087562	unknown	Gm16754	chr9	21029815	21037083
ENSMUSG00000085586	unknown	Gm11613	chr11	97505498	97521681
ENSMUSG00000086615	unknown	Gm16862	chr17	45871455	45925543
ENSMUSG00000086560	unknown	Gm13372	chr2	27880937	27885957
ENSMUSG00000084888	unknown	Gm16908	chr18	61810628	61825191
ENSMUSG00000085964	unknown	Gm16983	chr8	129090870	129114888
ENSMUSG00000084846	unknown	A730011C13Rik	chr3	94798332	94801272
ENSMUSG00000084917	unknown	Gm17477	chr9	79966702	79969744
ENSMUSG00000078952	unknown	Gm11019	chr13	98204925	98266960
