# Supplementary material for: Characterization and analysis of long non-coding rna (lncRNA) in In Vitro- and Ex Vivo-derived cardiac progenitor cells
Source: PLoS One. 2017 Jun 22;12(6):e0180096. doi: 10.1371/journal.pone.0180096 (PMC5481004; doi:10.1371/journal.pone.0180096)
Supplement: S2 Table — (XLSX) [file pone.0180096.s004.xlsx]

## Sheet: d8EmGFP vs ESC
test_id	gene_id	gene	locus	chromosome	start	stop	sample_1	sample_2	status	value_1	value_2	log2(fold_change)	test_stat	p_value	q_value	significant	diff	Gene Length
XLOC_000001	XLOC_000001	Lypla1	chr1:4807892-4846735	chr1	4807892	4846735	d8 Nkx2-5 EmGFP	CLK	OK	19.1556	63.5933	1.73111	1.98733	0.1995	0.605117	no	44.4377	38843
XLOC_000002	XLOC_000002	Tcea1	chr1:4857255-4899149	chr1	4857255	4899149	d8 Nkx2-5 EmGFP	CLK	OK	8.00605	61.3589	2.93811	2.20657	0.04585	0.268032	no	53.3528	41894
XLOC_000003	XLOC_000003	Atp6v1h	chr1:5083172-5162549	chr1	5083172	5162549	d8 Nkx2-5 EmGFP	CLK	OK	28.3303	39.8932	0.493799	0.381592	0.6977	0.91759	no	11.5629	79377
XLOC_000004	XLOC_000004	Oprk1	chr1:5588492-5606144	chr1	5588492	5606144	d8 Nkx2-5 EmGFP	CLK	OK	2.1121	0.106626	-4.30805	-2.24145	0.07165	0.341725	no	2.00547	17652
XLOC_000005	XLOC_000005	Rb1cc1	chr1:6209899-6276104	chr1	6209899	6276104	d8 Nkx2-5 EmGFP	CLK	OK	3.42081	2.76015	-0.309592	-0.216988	0.8297	0.957868	no	0.66066	66205
XLOC_000006	XLOC_000006	Fam150a	chr1:6358767-6394731	chr1	6358767	6394731	d8 Nkx2-5 EmGFP	CLK	OK	0.0187368	0.0866208	2.20884	0.897284	0.41755	0.775651	no	0.067884	35964
XLOC_000007	XLOC_000007	St18	chr1:6487230-6860940	chr1	6487230	6860940	d8 Nkx2-5 EmGFP	CLK	NOTEST	0	0.00711563	inf	0	1	1	no	0.00711563	373710
XLOC_000008	XLOC_000008	Pcmtd1	chr1:7088919-7173628	chr1	7088919	7173628	d8 Nkx2-5 EmGFP	CLK	OK	4.6599	5.1502	0.144328	0.101185	0.9181	0.979446	no	0.4903	84709
XLOC_000009	XLOC_000009	-	chr1:9437166-9438141	chr1	9437166	9438141	d8 Nkx2-5 EmGFP	CLK	OK	1.80645	0	#NAME?	#NAME?	0.00395	0.101958	no	1.80645	975
XLOC_000010	XLOC_000010	-	chr1:9523377-9524146	chr1	9523377	9524146	d8 Nkx2-5 EmGFP	CLK	OK	0	0.145528	inf	#NAME?	0.049	0.270019	no	0.145528	769
XLOC_000011	XLOC_000011	-	chr1:9525809-9527049	chr1	9525809	9527049	d8 Nkx2-5 EmGFP	CLK	OK	0.0150509	0.100317	2.73664	1.30607	0.40575	0.768821	no	0.0852661	1240
XLOC_000012	XLOC_000012	Rrs1	chr1:9545407-9547455	chr1	9545407	9547455	d8 Nkx2-5 EmGFP	CLK	OK	13.2187	42.1825	1.67407	1.43658	0.2299	0.639369	no	28.9638	2048
XLOC_000013	XLOC_000013	Adhfe1	chr1:9548045-9631580	chr1	9548045	9631580	d8 Nkx2-5 EmGFP	CLK	OK	0.394808	0.261391	-0.59494	-0.293504	0.8237	0.956221	no	0.133417	83535
XLOC_000014	XLOC_000014	3110035E14Rik	chr1:9548045-9631580	chr1	9548045	9631580	d8 Nkx2-5 EmGFP	CLK	OK	0.154632	0.0304018	-2.3466	-0.468591	0.60735	0.880107	no	0.12423	83535
XLOC_000015	XLOC_000015	1700034P13Rik	chr1:9720716-9772521	chr1	9720716	9772521	d8 Nkx2-5 EmGFP	CLK	OK	0.137775	2.7188	4.30259	0.370005	0.38985	0.758302	no	2.58102	51805
XLOC_000016	XLOC_000016	Sgk3	chr1:9798129-9902568	chr1	9798129	9902568	d8 Nkx2-5 EmGFP	CLK	OK	1.63817	2.53036	0.627258	0.286651	0.7609	0.940297	no	0.89219	104439
XLOC_000017	XLOC_000017	6030422M02Rik	chr1:9908637-9940954	chr1	9908637	9940954	d8 Nkx2-5 EmGFP	CLK	OK	0.0229693	0.0912973	1.99087	0.838195	0.44685	0.791917	no	0.068328	32317
XLOC_000018	XLOC_000018	Cspp1	chr1:10038217-10136768	chr1	10038217	10136768	d8 Nkx2-5 EmGFP	CLK	OK	3.20835	3.32308	0.0506908	0.0335998	0.9734	0.991502	no	0.11473	98551
XLOC_000019	XLOC_000019	Prex2	chr1:10993464-11303682	chr1	10993464	11303682	d8 Nkx2-5 EmGFP	CLK	OK	0.567931	2.20632	1.95785	1.20636	0.25815	0.661835	no	1.63839	310218
XLOC_000020	XLOC_000020	A830018L16Rik	chr1:11414104-11975902	chr1	11414104	11975902	d8 Nkx2-5 EmGFP	CLK	OK	0.0284143	0.56973	4.32559	1.2883	0.12825	0.482364	no	0.541316	561798
XLOC_000021	XLOC_000021	4932411L15	chr1:12667562-12673090	chr1	12667562	12673090	d8 Nkx2-5 EmGFP	CLK	OK	0	5.11965	inf	#NAME?	5e-05	0.00396813	yes	5.11965	5528
XLOC_000022	XLOC_000022	Sulf1	chr1:12692208-12861185	chr1	12692208	12861185	d8 Nkx2-5 EmGFP	CLK	OK	10.4786	29.4297	1.48983	1.21997	0.24465	0.654137	no	18.9511	168977
XLOC_000023	XLOC_000023	-	chr1:13056420-13062361	chr1	13056420	13062361	d8 Nkx2-5 EmGFP	CLK	NOTEST	0	0.0782517	inf	0	1	1	no	0.0782517	5941
XLOC_000024	XLOC_000024	Xkr9	chr1:13668770-13701723	chr1	13668770	13701723	d8 Nkx2-5 EmGFP	CLK	NOTEST	0.00673344	0.00543367	-0.309416	0	1	1	no	0.00129977	32953
XLOC_000025	XLOC_000025	Kcnb2	chr1:15312422-15714214	chr1	15312422	15714214	d8 Nkx2-5 EmGFP	CLK	OK	0.451159	0.00410733	-6.77929	-1.34579	0.17945	0.576089	no	0.447052	401792
XLOC_000026	XLOC_000026	Terf1	chr1:15803166-15843429	chr1	15803166	15843429	d8 Nkx2-5 EmGFP	CLK	OK	11.8967	35.0188	1.55756	1.14653	0.2695	0.671678	no	23.1221	40263
XLOC_000027	XLOC_000027	Rdh10	chr1:16105301-16133722	chr1	16105301	16133722	d8 Nkx2-5 EmGFP	CLK	OK	6.73758	2.01387	-1.74226	-1.01289	0.3358	0.724601	no	4.72371	28421
XLOC_000028	XLOC_000028	D030040B21Rik	chr1:16657551-16662278	chr1	16657551	16662278	d8 Nkx2-5 EmGFP	CLK	NOTEST	0	0	0	0	1	1	no	0	4727
XLOC_000029	XLOC_000029	Tmem70	chr1:16665190-16678275	chr1	16665190	16678275	d8 Nkx2-5 EmGFP	CLK	OK	12.6334	8.84186	-0.514825	-0.338126	0.74395	0.934492	no	3.79154	13085
XLOC_000030	XLOC_000030	Ly96	chr1:16688105-16709605	chr1	16688105	16709605	d8 Nkx2-5 EmGFP	CLK	OK	1.38981	0.0785203	-4.14568	-1.75076	0.15415	0.533999	no	1.31129	21500
XLOC_000031	XLOC_000031	Gdap1	chr1:17145372-17164270	chr1	17145372	17164270	d8 Nkx2-5 EmGFP	CLK	NOTEST	0.0403664	0.00398651	-3.33996	0	1	1	no	0.0363799	18898
XLOC_000032	XLOC_000032	-	chr1:17253405-17395579	chr1	17253405	17395579	d8 Nkx2-5 EmGFP	CLK	OK	0.0492712	0.29582	2.5859	1.3275	0.35895	0.739827	no	0.246549	142174
XLOC_000033	XLOC_000033	Pi15	chr1:17601668-17630939	chr1	17601668	17630939	d8 Nkx2-5 EmGFP	CLK	NOTEST	0.01021	0.0144654	0.50262	0	1	1	no	0.0042554	29271
XLOC_000034	XLOC_000034	Crispld1	chr1:17727416-17766207	chr1	17727416	17766207	d8 Nkx2-5 EmGFP	CLK	OK	4.08701	0.9136	-2.16141	-1.4821	0.26155	0.665041	no	3.17341	38791
XLOC_000035	XLOC_000035	Tfap2d	chr1:19103021-19166332	chr1	19103021	19166332	d8 Nkx2-5 EmGFP	CLK	NOTEST	0	0.0429952	inf	0	1	1	no	0.0429952	63311
XLOC_000036	XLOC_000036	Tfap2b	chr1:19208913-19238734	chr1	19208913	19238734	d8 Nkx2-5 EmGFP	CLK	NOTEST	0.0145218	0.00128064	-3.50328	0	1	1	no	0.0132412	29821
XLOC_000037	XLOC_000037	4930486I03Rik	chr1:20057778-20618057	chr1	20057778	20618057	d8 Nkx2-5 EmGFP	CLK	NOTEST	0	0.0359763	inf	0	1	1	no	0.0359763	560279
XLOC_000038	XLOC_000038	Mir206	chr1:20679009-20679082	chr1	20679009	20679082	d8 Nkx2-5 EmGFP	CLK	NOTEST	0	0	0	0	1	1	no	0	73
XLOC_000039	XLOC_000039	Mir133b	chr1:20682768-20682887	chr1	20682768	20682887	d8 Nkx2-5 EmGFP	CLK	NOTEST	0	0	0	0	1	1	no	0	119
XLOC_000040	XLOC_000040	Il17a	chr1:20730904-20734496	chr1	20730904	20734496	d8 Nkx2-5 EmGFP	CLK	NOTEST	0	0	0	0	1	1	no	0	3592
XLOC_000041	XLOC_000041	Paqr8	chr1:20890572-20939596	chr1	20890572	20939596	d8 Nkx2-5 EmGFP	CLK	OK	0.904838	1.41666	0.646765	0.349602	0.74675	0.935634	no	0.511822	49024
XLOC_000042	XLOC_000042	Efhc1	chr1:20951625-20990841	chr1	20951625	20990841	d8 Nkx2-5 EmGFP	CLK	OK	1.39711	1.15155	-0.278861	-0.143486	0.8942	0.973726	no	0.24556	39216
XLOC_000043	XLOC_000043	-	chr1:21166397-21193302	chr1	21166397	21193302	d8 Nkx2-5 EmGFP	CLK	OK	0.0420044	0.258336	2.62063	0.944035	0.4148	0.774007	no	0.216332	26905
XLOC_000044	XLOC_000044	Tmem14a	chr1:21218574-21283734	chr1	21218574	21283734	d8 Nkx2-5 EmGFP	CLK	OK	2.60981	1.10358	-1.24175	-0.545531	0.7034	0.919839	no	1.50623	65160
XLOC_000045	XLOC_000045	Gsta3	chr1:21218574-21283734	chr1	21218574	21283734	d8 Nkx2-5 EmGFP	CLK	OK	0.140992	2.72112	4.27052	0.849466	0.33405	0.723425	no	2.58013	65160
XLOC_000046	XLOC_000046	Khdc1a	chr1:21349676-21352199	chr1	21349676	21352199	d8 Nkx2-5 EmGFP	CLK	NOTEST	0	0	0	0	1	1	no	0	2523
XLOC_000047	XLOC_000047	Khdc1c	chr1:21368330-21369743	chr1	21368330	21369743	d8 Nkx2-5 EmGFP	CLK	NOTEST	0	0	0	0	1	1	no	0	1413
XLOC_000048	XLOC_000048	Khdc1b	chr1:21383555-21386384	chr1	21383555	21386384	d8 Nkx2-5 EmGFP	CLK	NOTEST	0.00427608	0.00340201	-0.329902	0	1	1	no	0.00087407	2829
XLOC_000049	XLOC_000049	Kcnq5	chr1:21398402-21973459	chr1	21398402	21973459	d8 Nkx2-5 EmGFP	CLK	OK	0.669149	0	#NAME?	#NAME?	0.1104	0.446378	no	0.669149	575057
XLOC_000050	XLOC_000050	Mir30a	chr1:23272268-23272339	chr1	23272268	23272339	d8 Nkx2-5 EmGFP	CLK	NOTEST	0	0	0	0	1	1	no	0	71
XLOC_000051	XLOC_000051	Mir30c-2	chr1:23291700-23293700	chr1	23291700	23293700	d8 Nkx2-5 EmGFP	CLK	OK	0.177466	0.103337	-0.780184	-0.296918	0.71645	0.925093	no	0.074129	2000
XLOC_000052	XLOC_000052	B3gat2	chr1:23761925-23922289	chr1	23761925	23922289	d8 Nkx2-5 EmGFP	CLK	OK	0.280068	0.0973977	-1.52382	-0.119774	0.36665	0.744637	no	0.18267	160364
XLOC_000053	XLOC_000053	Col9a1	chr1:24164450-24252738	chr1	24164450	24252738	d8 Nkx2-5 EmGFP	CLK	OK	14.0912	0.0685173	-7.68412	-4.36506	0.01685	0.211001	no	14.0227	88288
XLOC_000054	XLOC_000054	Lmbrd1	chr1:24678543-24766301	chr1	24678543	24766301	d8 Nkx2-5 EmGFP	CLK	OK	5.91551	2.46429	-1.26333	-0.847831	0.41665	0.775166	no	3.45122	87758
XLOC_000055	XLOC_000055	Lgsn	chr1:31141077-31222656	chr1	31141077	31222656	d8 Nkx2-5 EmGFP	CLK	NOTEST	0	0.0146043	inf	0	1	1	no	0.0146043	81579
XLOC_000056	XLOC_000056	4930521A18Rik	chr1:31222838-31224287	chr1	31222838	31224287	d8 Nkx2-5 EmGFP	CLK	NOTEST	0	0	0	0	1	1	no	0	1449
XLOC_000057	XLOC_000057	Gm4850	chr1:31264846-31268061	chr1	31264846	31268061	d8 Nkx2-5 EmGFP	CLK	NOTEST	0	0.0165671	inf	0	1	1	no	0.0165671	3215
XLOC_000058	XLOC_000058	Khdrbs2	chr1:32172805-32657738	chr1	32172805	32657738	d8 Nkx2-5 EmGFP	CLK	OK	0.0918638	0	#NAME?	#NAME?	0.0285	0.249213	no	0.0918638	484933
XLOC_000059	XLOC_000059	1700001G17Rik	chr1:33669823-33670712	chr1	33669823	33670712	d8 Nkx2-5 EmGFP	CLK	OK	0.351019	0.059147	-2.56917	-1.55719	0.3802	0.752568	no	0.291872	889
XLOC_000060	XLOC_000060	Rab23	chr1:33719869-33742564	chr1	33719869	33742564	d8 Nkx2-5 EmGFP	CLK	OK	4.39548	9.14653	1.0572	0.75652	0.45575	0.798425	no	4.75105	22695
XLOC_000061	XLOC_000061	Dst	chr1:33908212-34308653	chr1	33908212	34308653	d8 Nkx2-5 EmGFP	CLK	OK	4.97702	18.8617	1.92211	1.55935	0.1335	0.493056	no	13.8847	400441
XLOC_000062	XLOC_000062	Imp4	chr1:34439828-34445747	chr1	34439828	34445747	d8 Nkx2-5 EmGFP	CLK	OK	28.7321	74.5711	1.37596	1.28212	0.27295	0.674318	no	45.839	5919
XLOC_000063	XLOC_000063	Ptpn18	chr1:34459745-34474934	chr1	34459745	34474934	d8 Nkx2-5 EmGFP	CLK	OK	6.29313	0.820079	-2.93994	-1.61567	0.152	0.529333	no	5.47305	15189
XLOC_000064	XLOC_000064	Prss39	chr1:34498429-34503062	chr1	34498429	34503062	d8 Nkx2-5 EmGFP	CLK	NOTEST	0.0218067	0.0740556	1.76384	0	1	1	no	0.0522489	4633
XLOC_000065	XLOC_000065	Cfc1	chr1:34535085-34544311	chr1	34535085	34544311	d8 Nkx2-5 EmGFP	CLK	OK	89.4783	0.537072	-7.38028	-4.33353	0.01355	0.191109	no	88.9412	9226
XLOC_000066	XLOC_000066	Fam123c	chr1:34578948-34591938	chr1	34578948	34591938	d8 Nkx2-5 EmGFP	CLK	OK	1.7983	0.0209339	-6.42465	-3.25639	0.0648	0.317856	no	1.77737	12990
XLOC_000067	XLOC_000067	Arhgef4	chr1:34678148-34843050	chr1	34678148	34843050	d8 Nkx2-5 EmGFP	CLK	OK	1.90599	1.25422	-0.603753	-0.112002	0.91025	0.97763	no	0.65177	164902
XLOC_000068	XLOC_000068	Plekhb2	chr1:34849958-34879585	chr1	34849958	34879585	d8 Nkx2-5 EmGFP	CLK	OK	7.38054	8.32741	0.17414	0.122684	0.90195	0.975682	no	0.94687	29627
XLOC_000069	XLOC_000069	Hs6st1	chr1:36068399-36106446	chr1	36068399	36106446	d8 Nkx2-5 EmGFP	CLK	OK	19.6506	28.961	0.559539	0.490063	0.65505	0.899709	no	9.3104	38047
XLOC_000070	XLOC_000070	Arid5a	chr1:36307732-36324029	chr1	36307732	36324029	d8 Nkx2-5 EmGFP	CLK	OK	0.35798	0.769808	1.10462	0.571729	0.5923	0.87322	no	0.411828	16297
XLOC_000071	XLOC_000071	Cnnm4	chr1:36471596-36508776	chr1	36471596	36508776	d8 Nkx2-5 EmGFP	CLK	OK	1.80154	1.75031	-0.0416197	-0.0260328	0.98125	0.993623	no	0.05123	37180
XLOC_000072	XLOC_000072	Cnnm3	chr1:36511467-36528237	chr1	36511467	36528237	d8 Nkx2-5 EmGFP	CLK	OK	7.20571	9.33029	0.372781	0.284097	0.7851	0.946268	no	2.12458	16770
XLOC_000073	XLOC_000073	Cox5b	chr1:36691450-36694382	chr1	36691450	36694382	d8 Nkx2-5 EmGFP	CLK	OK	8.97302	422.689	5.55786	3.34033	0.01125	0.174948	no	413.716	2932
XLOC_000074	XLOC_000074	4933424G06Rik	chr1:36714537-36757960	chr1	36714537	36757960	d8 Nkx2-5 EmGFP	CLK	NOTEST	0.059264	0.00658826	-3.16919	0	1	1	no	0.0526757	43423
XLOC_000075	XLOC_000075	Zap70	chr1:36761860-36782816	chr1	36761860	36782816	d8 Nkx2-5 EmGFP	CLK	OK	0.264555	1.15819	2.13023	1.04725	0.3521	0.735281	no	0.893635	20956
XLOC_000076	XLOC_000076	-	chr1:37085282-37141190	chr1	37085282	37141190	d8 Nkx2-5 EmGFP	CLK	OK	0.0128807	4.69241	8.50897	4.17351	0.22165	0.632051	no	4.67953	55908
XLOC_000077	XLOC_000077	Cnga3	chr1:37219260-37263384	chr1	37219260	37263384	d8 Nkx2-5 EmGFP	CLK	OK	0.0318724	0.931974	4.86991	2.43004	0.11195	0.449974	no	0.900102	44124
XLOC_000078	XLOC_000078	Inpp4a	chr1:37299892-37410735	chr1	37299892	37410735	d8 Nkx2-5 EmGFP	CLK	OK	2.81624	0.329787	-3.09416	-1.72132	0.1192	0.466017	no	2.48645	110843
XLOC_000079	XLOC_000079	Unc50	chr1:37430171-37439124	chr1	37430171	37439124	d8 Nkx2-5 EmGFP	CLK	OK	19.7957	11.1838	-0.823768	-0.543486	0.6056	0.879147	no	8.6119	8953
XLOC_000080	XLOC_000080	Lipt1	chr1:37871629-37898333	chr1	37871629	37898333	d8 Nkx2-5 EmGFP	CLK	OK	1.8438	6.38809	1.7927	0.462294	0.72885	0.929314	no	4.54429	26704
XLOC_000081	XLOC_000081	Mrpl30	chr1:37871629-37898333	chr1	37871629	37898333	d8 Nkx2-5 EmGFP	CLK	OK	61.7206	91.1083	0.56183	0.382053	0.71	0.922586	no	29.3877	26704
XLOC_000082	XLOC_000082	Eif5b	chr1:37998009-38129662	chr1	37998009	38129662	d8 Nkx2-5 EmGFP	CLK	OK	16.354	23.1377	0.500605	0.392679	0.70235	0.91941	no	6.7837	131653
XLOC_000083	XLOC_000083	Nms	chr1:38939148-38950276	chr1	38939148	38950276	d8 Nkx2-5 EmGFP	CLK	NOTEST	0	0	0	0	1	1	no	0	11128
XLOC_000084	XLOC_000084	Pdcl3	chr1:38987813-38997236	chr1	38987813	38997236	d8 Nkx2-5 EmGFP	CLK	OK	24.5449	21.3261	-0.202806	-0.176654	0.8827	0.971391	no	3.2188	9423
XLOC_000085	XLOC_000085	Npas2	chr1:39194271-39363240	chr1	39194271	39363240	d8 Nkx2-5 EmGFP	CLK	OK	0.698394	0.0302727	-4.52795	-2.19131	0.1069	0.437507	no	0.668121	168969
XLOC_000086	XLOC_000086	Rpl31	chr1:39367850-39478747	chr1	39367850	39478747	d8 Nkx2-5 EmGFP	CLK	OK	8.65578	614.083	6.14862	3.75509	0.01315	0.188716	no	605.427	110897
XLOC_000087	XLOC_000087	D1Bwg0212e	chr1:39535801-39546877	chr1	39535801	39546877	d8 Nkx2-5 EmGFP	CLK	OK	12.7239	28.087	1.14237	1.02214	0.38165	0.753373	no	15.3631	11076
XLOC_000088	XLOC_000088	Rfx8	chr1:39655255-39720989	chr1	39655255	39720989	d8 Nkx2-5 EmGFP	CLK	OK	0	0.325654	inf	#NAME?	0.12565	0.477751	no	0.325654	65734
XLOC_000089	XLOC_000089	Map4k4	chr1:39900899-40026310	chr1	39900899	40026310	d8 Nkx2-5 EmGFP	CLK	FAIL	51.1362	0	0	0	1	1	no	51.1362	125411
XLOC_000090	XLOC_000090	Il1r2	chr1:40076211-40125226	chr1	40076211	40125226	d8 Nkx2-5 EmGFP	CLK	OK	0.0850139	0.748338	3.13792	1.42169	0.251	0.656973	no	0.663324	49015
XLOC_000091	XLOC_000091	Il1r1	chr1:40225079-40316184	chr1	40225079	40316184	d8 Nkx2-5 EmGFP	CLK	OK	1.38799	0.125391	-3.46849	-1.7836	0.12025	0.467949	no	1.2626	91105
XLOC_000092	XLOC_000092	Il1rl2	chr1:40324519-40367540	chr1	40324519	40367540	d8 Nkx2-5 EmGFP	CLK	OK	0.0432918	0.117636	1.44216	0.653052	0.5381	0.845731	no	0.0743442	43021
XLOC_000093	XLOC_000093	Il1rl1	chr1:40435893-40465414	chr1	40435893	40465414	d8 Nkx2-5 EmGFP	CLK	NOTEST	0.00723697	0.00281665	-1.36141	0	1	1	no	0.00442032	29521
XLOC_000094	XLOC_000094	Il18r1	chr1:40465551-40500854	chr1	40465551	40500854	d8 Nkx2-5 EmGFP	CLK	NOTEST	0	0	0	0	1	1	no	0	35303
XLOC_000095	XLOC_000095	Il18rap	chr1:40515361-40549297	chr1	40515361	40549297	d8 Nkx2-5 EmGFP	CLK	NOTEST	0.0239791	0.0267335	0.15687	0	1	1	no	0.0027544	33936
XLOC_000096	XLOC_000096	Slc9a4	chr1:40580226-40630731	chr1	40580226	40630731	d8 Nkx2-5 EmGFP	CLK	NOTEST	0	0	0	0	1	1	no	0	50505
XLOC_000097	XLOC_000097	Slc9a2	chr1:40681711-40768885	chr1	40681711	40768885	d8 Nkx2-5 EmGFP	CLK	OK	0.00261056	0.0885748	5.08446	2.32137	0.2989	0.695895	no	0.0859642	87174
XLOC_000098	XLOC_000098	Tmem182	chr1:40805600-40855267	chr1	40805600	40855267	d8 Nkx2-5 EmGFP	CLK	NOTEST	0.020308	0	#NAME?	0	1	1	no	0.020308	49667
XLOC_000099	XLOC_000099	-	chr1:42695729-42696892	chr1	42695729	42696892	d8 Nkx2-5 EmGFP	CLK	NOTEST	0.0327062	0.0507826	0.634769	0	1	1	no	0.0180764	1163
XLOC_000100	XLOC_000100	Pou3f3	chr1:42697145-42700209	chr1	42697145	42700209	d8 Nkx2-5 EmGFP	CLK	NOTEST	0.0719969	0.0410937	-0.809017	0	1	1	no	0.0309032	3064
XLOC_000101	XLOC_000101	2900092D14Rik	chr1:42700335-42703176	chr1	42700335	42703176	d8 Nkx2-5 EmGFP	CLK	NOTEST	0.00984578	0.00397181	-1.30971	0	1	1	no	0.00587397	2841
XLOC_000102	XLOC_000102	Mrps9	chr1:42851232-42905683	chr1	42851232	42905683	d8 Nkx2-5 EmGFP	CLK	OK	18.4663	39.4433	1.09488	0.906304	0.4354	0.785679	no	20.977	54451
XLOC_000103	XLOC_000103	Gpr45	chr1:42952871-43035449	chr1	42952871	43035449	d8 Nkx2-5 EmGFP	CLK	OK	0.504616	0.154255	-1.70987	-0.889146	0.46715	0.805887	no	0.350361	82578
XLOC_000104	XLOC_000104	AI597479	chr1:43098709-43115946	chr1	43098709	43115946	d8 Nkx2-5 EmGFP	CLK	OK	7.43613	7.63756	0.0385599	0.0359094	0.97705	0.992337	no	0.20143	17237
XLOC_000105	XLOC_000105	Nck2	chr1:43445750-43570518	chr1	43445750	43570518	d8 Nkx2-5 EmGFP	CLK	OK	17.7575	3.4459	-2.36548	-1.57346	0.1394	0.50428	no	14.3116	124768
XLOC_000106	XLOC_000106	1500015O10Rik	chr1:43730601-43742564	chr1	43730601	43742564	d8 Nkx2-5 EmGFP	CLK	OK	0.504523	0.543421	0.10715	0.0641469	0.963	0.988952	no	0.038898	11963
XLOC_000107	XLOC_000107	Tpp2	chr1:43932261-44003179	chr1	43932261	44003179	d8 Nkx2-5 EmGFP	CLK	OK	20.6663	36.641	0.826178	0.687976	0.49905	0.826046	no	15.9747	70918
XLOC_000108	XLOC_000108	Bivm	chr1:44119967-44144771	chr1	44119967	44144771	d8 Nkx2-5 EmGFP	CLK	OK	6.05065	5.01648	-0.270416	-0.222078	0.864	0.966586	no	1.03417	24804
XLOC_000109	XLOC_000109	Ercc5	chr1:44147743-44181260	chr1	44147743	44181260	d8 Nkx2-5 EmGFP	CLK	OK	5.03033	5.23227	0.0567819	0.0388705	0.9671	0.989966	no	0.20194	33517
XLOC_000110	XLOC_000110	Gulp1	chr1:44551670-44796836	chr1	44551670	44796836	d8 Nkx2-5 EmGFP	CLK	OK	9.32846	1.19722	-2.96195	-1.90419	0.1224	0.471744	no	8.13124	245166
XLOC_000111	XLOC_000111	Col3a1	chr1:45311537-45349706	chr1	45311537	45349706	d8 Nkx2-5 EmGFP	CLK	OK	201.691	0.800735	-7.9766	-4.86919	0.00135	0.0528094	no	200.89	38169
XLOC_000112	XLOC_000112	Wdr75	chr1:45795500-45823613	chr1	45795500	45823613	d8 Nkx2-5 EmGFP	CLK	OK	17.1306	61.9123	1.85365	1.62772	0.163	0.550718	no	44.7817	28113
XLOC_000113	XLOC_000113	Dnahc7b	chr1:46066251-46373632	chr1	46066251	46373632	d8 Nkx2-5 EmGFP	CLK	OK	0.229185	0.0415845	-2.4624	-1.128	0.3004	0.697425	no	0.187601	307381
XLOC_000114	XLOC_000114	Tmeff2	chr1:50927365-51187270	chr1	50927365	51187270	d8 Nkx2-5 EmGFP	CLK	OK	1.14139	0.891095	-0.357137	-0.15822	0.8741	0.969618	no	0.250295	259905
XLOC_000115	XLOC_000115	Sdpr	chr1:51218385-51333779	chr1	51218385	51333779	d8 Nkx2-5 EmGFP	CLK	OK	1.77632	0.015922	-6.80172	-3.26921	0.1333	0.492828	no	1.7604	115394
XLOC_000116	XLOC_000116	Stat4	chr1:52008243-52107184	chr1	52008243	52107184	d8 Nkx2-5 EmGFP	CLK	OK	0.193838	4.21438	4.4424	2.42362	0.05545	0.287285	no	4.02054	98941
XLOC_000117	XLOC_000117	Stat1	chr1:52119437-52161865	chr1	52119437	52161865	d8 Nkx2-5 EmGFP	CLK	OK	3.58897	7.29819	1.02397	0.664729	0.50975	0.831477	no	3.70922	42428
XLOC_000118	XLOC_000118	Tmem194b	chr1:52630698-52652171	chr1	52630698	52652171	d8 Nkx2-5 EmGFP	CLK	OK	4.49806	1.60245	-1.48903	-0.860397	0.4116	0.772009	no	2.89561	21473
XLOC_000119	XLOC_000119	Hibch	chr1:52845041-52920860	chr1	52845041	52920860	d8 Nkx2-5 EmGFP	CLK	OK	5.30872	5.06893	-0.0666821	-0.0395311	0.97085	0.990752	no	0.23979	75819
XLOC_000120	XLOC_000120	Mstn	chr1:53061662-53068079	chr1	53061662	53068079	d8 Nkx2-5 EmGFP	CLK	NOTEST	0.0590443	0	#NAME?	0	1	1	no	0.0590443	6417
XLOC_000121	XLOC_000121	Ormdl1	chr1:53297094-53310245	chr1	53297094	53310245	d8 Nkx2-5 EmGFP	CLK	OK	12.4048	5.90357	-1.07124	-0.964756	0.5252	0.838932	no	6.50123	13151
XLOC_000122	XLOC_000122	Osgepl1	chr1:53312569-53326280	chr1	53312569	53326280	d8 Nkx2-5 EmGFP	CLK	OK	3.28776	2.77367	-0.24531	-0.13752	0.89545	0.974002	no	0.51409	13711
XLOC_000123	XLOC_000123	Ccdc150	chr1:54250682-54368727	chr1	54250682	54368727	d8 Nkx2-5 EmGFP	CLK	OK	0.0808589	0.0196583	-2.04027	-0.835412	0.43035	0.78296	no	0.0612006	118045
XLOC_000124	XLOC_000124	Coq10b	chr1:55052769-55072702	chr1	55052769	55072702	d8 Nkx2-5 EmGFP	CLK	OK	5.53794	13.1321	1.24568	0.777132	0.459	0.800575	no	7.59416	19933
XLOC_000125	XLOC_000125	Hspe1	chr1:55087988-55091450	chr1	55087988	55091450	d8 Nkx2-5 EmGFP	CLK	OK	54.448	658.332	3.59586	2.88696	0.01235	0.182906	no	603.884	3462
XLOC_000126	XLOC_000126	Mob4	chr1:55131222-55159644	chr1	55131222	55159644	d8 Nkx2-5 EmGFP	CLK	OK	16.8195	10.7192	-0.649932	-0.475387	0.6483	0.89741	no	6.1003	28422
XLOC_000127	XLOC_000127	Mars2	chr1:55170159-55244240	chr1	55170159	55244240	d8 Nkx2-5 EmGFP	CLK	OK	1.6273	5.54299	1.76818	0.898624	0.3777	0.750929	no	3.91569	74081
XLOC_000128	XLOC_000128	Plcl1	chr1:55405945-55754285	chr1	55405945	55754285	d8 Nkx2-5 EmGFP	CLK	OK	0.547746	0.0736124	-2.89549	-1.69269	0.2311	0.640287	no	0.474134	348340
XLOC_000129	XLOC_000129	9130227L01Rik	chr1:55931240-55972098	chr1	55931240	55972098	d8 Nkx2-5 EmGFP	CLK	NOTEST	0	0	0	0	1	1	no	0	40858
XLOC_000130	XLOC_000130	-	chr1:56681205-56686378	chr1	56681205	56686378	d8 Nkx2-5 EmGFP	CLK	NOTEST	0	0	0	0	1	1	no	0	5173
XLOC_000131	XLOC_000131	9130024F11Rik	chr1:56793980-56980414	chr1	56793980	56980414	d8 Nkx2-5 EmGFP	CLK	OK	0.114791	0.084857	-0.435902	-0.0787022	0.797	0.949513	no	0.029934	186434
XLOC_000132	XLOC_000132	1700066M21Rik	chr1:57377619-57385422	chr1	57377619	57385422	d8 Nkx2-5 EmGFP	CLK	OK	1.36828	1.05258	-0.378434	-0.194504	0.85805	0.964841	no	0.3157	7803
XLOC_000133	XLOC_000133	9430016H08Rik	chr1:57388243-57415958	chr1	57388243	57415958	d8 Nkx2-5 EmGFP	CLK	OK	14.5495	19.7318	0.43955	0.276393	0.78885	0.947511	no	5.1823	27715
XLOC_000134	XLOC_000134	Spats2l	chr1:57774682-57948428	chr1	57774682	57948428	d8 Nkx2-5 EmGFP	CLK	OK	11.5604	1.63371	-2.82297	-1.83793	0.09725	0.413532	no	9.92669	173746
XLOC_000135	XLOC_000135	Sgol2	chr1:57985339-58026277	chr1	57985339	58026277	d8 Nkx2-5 EmGFP	CLK	OK	7.65237	7.16254	-0.0954345	-0.0716538	0.9465	0.985797	no	0.48983	40938
XLOC_000136	XLOC_000136	Aox1	chr1:58029802-58106410	chr1	58029802	58106410	d8 Nkx2-5 EmGFP	CLK	OK	0.362143	0.0949539	-1.93126	-0.906656	0.41445	0.773663	no	0.267189	76608
XLOC_000137	XLOC_000137	Aox3	chr1:58113135-58200452	chr1	58113135	58200452	d8 Nkx2-5 EmGFP	CLK	OK	0.0267574	0.464864	4.1188	1.97206	0.1444	0.514782	no	0.438107	87317
XLOC_000138	XLOC_000138	Aox4	chr1:58210396-58268596	chr1	58210396	58268596	d8 Nkx2-5 EmGFP	CLK	OK	0.505956	0.197221	-1.3592	-0.681003	0.53845	0.845821	no	0.308735	58200
XLOC_000139	XLOC_000139	Aox3l1	chr1:58278325-58379264	chr1	58278325	58379264	d8 Nkx2-5 EmGFP	CLK	NOTEST	0.02178	0	#NAME?	0	1	1	no	0.02178	100939
XLOC_000140	XLOC_000140	Bzw1	chr1:58391409-58407864	chr1	58391409	58407864	d8 Nkx2-5 EmGFP	CLK	OK	67.9345	112.374	0.726092	0.622022	0.5349	0.844492	no	44.4395	16455
XLOC_000141	XLOC_000141	Nif3l1	chr1:58430992-58505102	chr1	58430992	58505102	d8 Nkx2-5 EmGFP	CLK	OK	10.523	32.2321	1.61496	0.856383	0.4468	0.791898	no	21.7091	74110
XLOC_000142	XLOC_000142	Ndufb3	chr1:58522671-58595948	chr1	58522671	58595948	d8 Nkx2-5 EmGFP	CLK	OK	78.038	67.7432	-0.2041	-0.132077	0.89985	0.97515	no	10.2948	73277
XLOC_000143	XLOC_000143	Gm20257	chr1:58651881-58695989	chr1	58651881	58695989	d8 Nkx2-5 EmGFP	CLK	NOTEST	0.0445802	0	#NAME?	0	1	1	no	0.0445802	44108
XLOC_000144	XLOC_000144	Cflar	chr1:58711528-58758882	chr1	58711528	58758882	d8 Nkx2-5 EmGFP	CLK	OK	5.1634	4.02821	-0.358182	-0.191607	0.8255	0.956808	no	1.13519	47354
XLOC_000145	XLOC_000145	Casp8	chr1:58795373-58856945	chr1	58795373	58856945	d8 Nkx2-5 EmGFP	CLK	OK	1.5023	1.00427	-0.581023	-0.302473	0.7787	0.94549	no	0.49803	61572
XLOC_000146	XLOC_000146	Stradb	chr1:58973570-58995121	chr1	58973570	58995121	d8 Nkx2-5 EmGFP	CLK	OK	7.06925	5.67218	-0.317655	-0.196272	0.84965	0.962895	no	1.39707	21551
XLOC_000147	XLOC_000147	Cdk15	chr1:59256906-59352369	chr1	59256906	59352369	d8 Nkx2-5 EmGFP	CLK	OK	0.208041	0.0328171	-2.66435	-1.27686	0.3545	0.737187	no	0.175224	95463
XLOC_000148	XLOC_000148	Fzd7	chr1:59480388-59489692	chr1	59480388	59489692	d8 Nkx2-5 EmGFP	CLK	OK	43.3444	28.6644	-0.596583	-0.504474	0.61855	0.884771	no	14.68	9304
XLOC_000149	XLOC_000149	Gm973	chr1:59516263-59636397	chr1	59516263	59636397	d8 Nkx2-5 EmGFP	CLK	OK	0.0618609	0.242276	1.96955	0.879935	0.4276	0.78191	no	0.180415	120134
XLOC_000150	XLOC_000150	Nop58	chr1:59685005-59711510	chr1	59685005	59711510	d8 Nkx2-5 EmGFP	CLK	OK	43.6859	88.4614	1.01788	0.857023	0.4076	0.769615	no	44.7755	26505
XLOC_000151	XLOC_000151	Snord70	chr1:59685005-59711510	chr1	59685005	59711510	d8 Nkx2-5 EmGFP	CLK	NOTEST	0	0	0	0	1	1	no	0	26505
XLOC_000152	XLOC_000152	Snord11	chr1:59685005-59711510	chr1	59685005	59711510	d8 Nkx2-5 EmGFP	CLK	NOTEST	0	0	0	0	1	1	no	0	26505
XLOC_000153	XLOC_000153	Bmpr2	chr1:59763422-59877868	chr1	59763422	59877868	d8 Nkx2-5 EmGFP	CLK	OK	9.29046	2.81705	-1.72156	-1.27154	0.2191	0.62972	no	6.47341	114446
XLOC_000154	XLOC_000154	Fam117b	chr1:59913005-59985346	chr1	59913005	59985346	d8 Nkx2-5 EmGFP	CLK	OK	13.4055	9.37399	-0.516092	-0.505289	0.6966	0.916939	no	4.03151	72341
XLOC_000155	XLOC_000155	Carf	chr1:60074704-60151034	chr1	60074704	60151034	d8 Nkx2-5 EmGFP	CLK	OK	0.881719	0.220338	-2.0006	-0.136417	0.4436	0.790033	no	0.661381	76330
XLOC_000156	XLOC_000156	Nbeal1	chr1:60180585-60338292	chr1	60180585	60338292	d8 Nkx2-5 EmGFP	CLK	OK	1.37886	1.20296	-0.196889	-0.130798	0.89915	0.974964	no	0.1759	157707
XLOC_000157	XLOC_000157	Cyp20a1	chr1:60342846-60388058	chr1	60342846	60388058	d8 Nkx2-5 EmGFP	CLK	OK	20.3302	9.02357	-1.17185	-0.79858	0.4418	0.789242	no	11.3066	45212
XLOC_000158	XLOC_000158	Abi2	chr1:60409575-60566765	chr1	60409575	60566765	d8 Nkx2-5 EmGFP	CLK	OK	13.3015	6.16213	-1.11009	-0.710292	0.60125	0.87689	no	7.13937	157190
XLOC_000159	XLOC_000159	Cd28	chr1:60746387-60773359	chr1	60746387	60773359	d8 Nkx2-5 EmGFP	CLK	OK	0.200638	0.0219039	-3.19534	-1.93732	0.2544	0.659105	no	0.178734	26972
XLOC_000160	XLOC_000160	Ctla4	chr1:60909024-60915830	chr1	60909024	60915830	d8 Nkx2-5 EmGFP	CLK	NOTEST	0	0	0	0	1	1	no	0	6806
XLOC_000161	XLOC_000161	Icos	chr1:60977913-61000321	chr1	60977913	61000321	d8 Nkx2-5 EmGFP	CLK	NOTEST	0.0183568	0.0147237	-0.318175	0	1	1	no	0.0036331	22408
XLOC_000162	XLOC_000162	9530026F06Rik	chr1:61378431-61395904	chr1	61378431	61395904	d8 Nkx2-5 EmGFP	CLK	NOTEST	0	0	0	0	1	1	no	0	17473
XLOC_000163	XLOC_000163	Pard3b	chr1:61638823-62642284	chr1	61638823	62642284	d8 Nkx2-5 EmGFP	CLK	OK	0.897558	0.193045	-2.21706	-0.7637	0.321	0.713617	no	0.704513	1003461
XLOC_000164	XLOC_000164	Nrp2	chr1:62703268-62818692	chr1	62703268	62818692	d8 Nkx2-5 EmGFP	CLK	OK	31.8543	9.35815	-1.76719	-1.4789	0.1558	0.537167	no	22.4962	115424
XLOC_000165	XLOC_000165	Gm11602	chr1:63114405-63176822	chr1	63114405	63176822	d8 Nkx2-5 EmGFP	CLK	OK	0.423509	0.244473	-0.792717	-0.063399	0.52875	0.841131	no	0.179036	62417
XLOC_000166	XLOC_000166	Eef1b2	chr1:63176830-63180486	chr1	63176830	63180486	d8 Nkx2-5 EmGFP	CLK	OK	358.893	948.682	1.40237	1.21048	0.2395	0.648749	no	589.789	3656
XLOC_000167	XLOC_000167	Snora41	chr1:63176830-63180486	chr1	63176830	63180486	d8 Nkx2-5 EmGFP	CLK	NOTEST	0	0	0	0	1	1	no	0	3656
XLOC_000168	XLOC_000168	Zdbf2	chr1:63273268-63314575	chr1	63273268	63314575	d8 Nkx2-5 EmGFP	CLK	OK	7.94594	9.76438	0.297311	0.245375	0.8112	0.952616	no	1.81844	41307
XLOC_000169	XLOC_000169	-	chr1:63439083-63445676	chr1	63439083	63445676	d8 Nkx2-5 EmGFP	CLK	OK	0.0352765	0.700442	4.31149	2.58162	0.2859	0.685475	no	0.665165	6593
XLOC_000170	XLOC_000170	Adam23	chr1:63445864-63596515	chr1	63445864	63596515	d8 Nkx2-5 EmGFP	CLK	OK	6.87026	22.4169	1.70615	1.23997	0.2286	0.638213	no	15.5466	150651
XLOC_000171	XLOC_000171	Fastkd2	chr1:63730428-63769267	chr1	63730428	63769267	d8 Nkx2-5 EmGFP	CLK	OK	4.56107	15.811	1.79349	1.50396	0.24975	0.656973	no	11.2499	38839
XLOC_000172	XLOC_000172	Gm13749	chr1:63964726-63968999	chr1	63964726	63968999	d8 Nkx2-5 EmGFP	CLK	NOTEST	0	0	0	0	1	1	no	0	4273
XLOC_000173	XLOC_000173	Creb1	chr1:64532803-64604548	chr1	64532803	64604548	d8 Nkx2-5 EmGFP	CLK	OK	6.03545	5.98284	-0.0126321	-0.00969355	0.9932	0.997659	no	0.05261	71745
XLOC_000174	XLOC_000174	Ccnyl1	chr1:64691344-64725646	chr1	64691344	64725646	d8 Nkx2-5 EmGFP	CLK	OK	3.0825	10.1939	1.72554	1.11446	0.28955	0.68832	no	7.1114	34302
XLOC_000175	XLOC_000175	Pikfyve	chr1:65186652-65278696	chr1	65186652	65278696	d8 Nkx2-5 EmGFP	CLK	OK	2.29104	2.35696	0.0409258	0.0287207	0.9762	0.991988	no	0.06592	92044
XLOC_000176	XLOC_000176	Pth2r	chr1:65311256-65389244	chr1	65311256	65389244	d8 Nkx2-5 EmGFP	CLK	NOTEST	0.0381562	0.069134	0.857479	0	1	1	no	0.0309778	77988
XLOC_000177	XLOC_000177	Crygf	chr1:65926521-65928304	chr1	65926521	65928304	d8 Nkx2-5 EmGFP	CLK	NOTEST	0	0	0	0	1	1	no	0	1783
XLOC_000178	XLOC_000178	Mtap2	chr1:66175311-66442585	chr1	66175311	66442585	d8 Nkx2-5 EmGFP	CLK	OK	0.429558	2.94009	2.77493	1.56205	0.15385	0.533477	no	2.51053	267274
XLOC_000179	XLOC_000179	Unc80	chr1:66468358-66699148	chr1	66468358	66699148	d8 Nkx2-5 EmGFP	CLK	NOTEST	0.00846472	0.0734713	3.11765	0	1	1	no	0.0650066	230790
XLOC_000180	XLOC_000180	Rpe	chr1:66700892-66817595	chr1	66700892	66817595	d8 Nkx2-5 EmGFP	CLK	OK	7.25784	11.3988	0.651266	0.542792	0.69825	0.917835	no	4.14096	116703
XLOC_000181	XLOC_000181	Cps1	chr1:67123065-67231169	chr1	67123065	67231169	d8 Nkx2-5 EmGFP	CLK	OK	0.0070082	0.19984	4.83366	2.17019	0.1602	0.545697	no	0.192832	108104
XLOC_000182	XLOC_000182	Spag16	chr1:69826972-70725132	chr1	69826972	70725132	d8 Nkx2-5 EmGFP	CLK	OK	1.30487	0.441214	-1.56435	-0.80222	0.46735	0.805957	no	0.863656	898160
XLOC_000183	XLOC_000183	Vwc2l	chr1:70725714-70885397	chr1	70725714	70885397	d8 Nkx2-5 EmGFP	CLK	NOTEST	0	0	0	0	1	1	no	0	159683
XLOC_000184	XLOC_000184	Atic	chr1:71556996-71580201	chr1	71556996	71580201	d8 Nkx2-5 EmGFP	CLK	OK	57.1038	275.383	2.26978	1.95421	0.06385	0.315082	no	218.279	23205
XLOC_000185	XLOC_000185	Apol7d	chr1:71653334-71662843	chr1	71653334	71662843	d8 Nkx2-5 EmGFP	CLK	OK	1.11648	0.106471	-3.39043	-1.74843	0.3017	0.698659	no	1.01001	9509
XLOC_000186	XLOC_000186	Gm8883	chr1:71888111-71891204	chr1	71888111	71891204	d8 Nkx2-5 EmGFP	CLK	NOTEST	0	0	0	0	1	1	no	0	3093
XLOC_000187	XLOC_000187	Tmem169	chr1:72284372-72303052	chr1	72284372	72303052	d8 Nkx2-5 EmGFP	CLK	OK	0.709782	0.0803176	-3.14359	-1.51985	0.20445	0.611734	no	0.629464	18680
XLOC_000188	XLOC_000188	Xrcc5	chr1:72307420-72394953	chr1	72307420	72394953	d8 Nkx2-5 EmGFP	CLK	OK	12.2508	52.6619	2.10388	1.80879	0.1198	0.467098	no	40.4111	87533
XLOC_000189	XLOC_000189	Smarcal1	chr1:72583250-72636790	chr1	72583250	72636790	d8 Nkx2-5 EmGFP	CLK	OK	5.44516	7.62626	0.486003	0.40085	0.71645	0.925093	no	2.1811	53540
XLOC_000190	XLOC_000190	Rpl37a	chr1:72711234-72713818	chr1	72711234	72713818	d8 Nkx2-5 EmGFP	CLK	OK	12.9149	2145.7	7.37627	4.87064	0.0012	0.0492617	yes	2132.79	2584
XLOC_000191	XLOC_000191	Igfbp2	chr1:72824479-72852471	chr1	72824479	72852471	d8 Nkx2-5 EmGFP	CLK	OK	194.139	336.677	0.794276	0.751294	0.49355	0.822172	no	142.538	27992
XLOC_000192	XLOC_000192	1700027A15Rik	chr1:73016035-73025508	chr1	73016035	73025508	d8 Nkx2-5 EmGFP	CLK	NOTEST	0	0	0	0	1	1	no	0	9473
XLOC_000193	XLOC_000193	D530049I02Rik	chr1:73391384-73430779	chr1	73391384	73430779	d8 Nkx2-5 EmGFP	CLK	NOTEST	0	0	0	0	1	1	no	0	39395
XLOC_000194	XLOC_000194	Rufy4	chr1:74124715-74148230	chr1	74124715	74148230	d8 Nkx2-5 EmGFP	CLK	OK	0.142166	0.053196	-1.41819	-0.653715	0.533	0.843765	no	0.08897	23515
XLOC_000195	XLOC_000195	Cxcr2	chr1:74153993-74161246	chr1	74153993	74161246	d8 Nkx2-5 EmGFP	CLK	OK	0.0309196	1.38902	5.4894	3.02493	0.10595	0.435146	no	1.3581	7253
XLOC_000196	XLOC_000196	Arpc2	chr1:74236488-74268213	chr1	74236488	74268213	d8 Nkx2-5 EmGFP	CLK	OK	119.157	126.987	0.0918098	0.0786533	0.9378	0.983954	no	7.83	31725
XLOC_000197	XLOC_000197	Gpbar1	chr1:74277078-74279794	chr1	74277078	74279794	d8 Nkx2-5 EmGFP	CLK	OK	2.75093	0.161573	-4.08967	-1.99467	0.1165	0.460029	no	2.58936	2716
XLOC_000198	XLOC_000198	Pnkd	chr1:74285033-74353692	chr1	74285033	74353692	d8 Nkx2-5 EmGFP	CLK	OK	29.6911	33.001	0.152478	0.0771521	0.9393	0.984249	no	3.3099	68659
XLOC_000199	XLOC_000199	Gm216	chr1:74362107-74369321	chr1	74362107	74369321	d8 Nkx2-5 EmGFP	CLK	OK	0.0582437	0.519373	3.1566	1.40518	0.2057	0.612554	no	0.461129	7214
XLOC_000200	XLOC_000200	Slc11a1	chr1:74375202-74386051	chr1	74375202	74386051	d8 Nkx2-5 EmGFP	CLK	OK	0.546259	0.609788	0.158722	0.0794881	0.94055	0.984368	no	0.063529	10849
XLOC_000201	XLOC_000201	Ctdsp1	chr1:74387931-74397285	chr1	74387931	74397285	d8 Nkx2-5 EmGFP	CLK	OK	34.9654	28.2679	-0.306764	-0.250177	0.8103	0.952519	no	6.6975	9354
XLOC_000202	XLOC_000202	Mir26b	chr1:74387931-74397285	chr1	74387931	74397285	d8 Nkx2-5 EmGFP	CLK	NOTEST	0	0	0	0	1	1	no	0	9354
XLOC_000203	XLOC_000203	Vil1	chr1:74409249-74593723	chr1	74409249	74593723	d8 Nkx2-5 EmGFP	CLK	OK	2.81439	0.983872	-1.51628	-0.158564	0.6598	0.901469	no	1.83052	184474
XLOC_000204	XLOC_000204	Rqcd1	chr1:74409249-74593723	chr1	74409249	74593723	d8 Nkx2-5 EmGFP	CLK	OK	36.1274	61.0838	0.757697	0.584707	0.62975	0.889336	no	24.9564	184474
XLOC_000205	XLOC_000205	Plcd4	chr1:74409249-74593723	chr1	74409249	74593723	d8 Nkx2-5 EmGFP	CLK	OK	0.198015	0.37919	0.93731	0.0443799	0.2648	0.667704	no	0.181175	184474
XLOC_000206	XLOC_000206	Bcs1l	chr1:74409249-74593723	chr1	74409249	74593723	d8 Nkx2-5 EmGFP	CLK	OK	9.53551	12.6438	0.407044	0.0982987	0.9331	0.983355	no	3.10829	184474
XLOC_000207	XLOC_000207	Stk36	chr1:74593751-74636982	chr1	74593751	74636982	d8 Nkx2-5 EmGFP	CLK	OK	3.20313	1.34439	-1.25253	-0.498545	0.6373	0.892741	no	1.85874	43231
XLOC_000208	XLOC_000208	Ttll4	chr1:74661639-74703880	chr1	74661639	74703880	d8 Nkx2-5 EmGFP	CLK	OK	7.96227	25.5145	1.68006	1.28797	0.20565	0.612525	no	17.5522	42241
XLOC_000209	XLOC_000209	Cyp27a1	chr1:74713573-74737890	chr1	74713573	74737890	d8 Nkx2-5 EmGFP	CLK	OK	2.12804	0.5486	-1.9557	-1.0276	0.377	0.75067	no	1.57944	24317
XLOC_000210	XLOC_000210	Wnt6	chr1:74771891-74785319	chr1	74771891	74785319	d8 Nkx2-5 EmGFP	CLK	OK	0.513254	0.507049	-0.0175472	-0.00966972	0.99175	0.997194	no	0.006205	13428
XLOC_000211	XLOC_000211	Wnt10a	chr1:74792018-74804175	chr1	74792018	74804175	d8 Nkx2-5 EmGFP	CLK	OK	0.00923665	0.119647	3.69527	1.74518	0.3159	0.710406	no	0.11041	12157
XLOC_000212	XLOC_000212	Cdk5r2	chr1:74855028-74857732	chr1	74855028	74857732	d8 Nkx2-5 EmGFP	CLK	OK	0.391313	0.765979	0.968983	0.584513	0.66575	0.904124	no	0.374666	2704
XLOC_000213	XLOC_000213	Fam134a	chr1:75135214-75147909	chr1	75135214	75147909	d8 Nkx2-5 EmGFP	CLK	OK	37.8353	11.8901	-1.66998	-1.00418	0.35045	0.734263	no	25.9452	12695
XLOC_000214	XLOC_000214	Zfand2b	chr1:75168643-75180283	chr1	75168643	75180283	d8 Nkx2-5 EmGFP	CLK	OK	20.596	8.65566	-1.25065	-0.527977	0.6578	0.900792	no	11.9403	11640
XLOC_000215	XLOC_000215	Ankzf1	chr1:75180863-75210778	chr1	75180863	75210778	d8 Nkx2-5 EmGFP	CLK	OK	11.494	7.90261	-0.540484	-0.248474	0.81895	0.955426	no	3.59139	29915
XLOC_000216	XLOC_000216	Stk16	chr1:75210828-75219296	chr1	75210828	75219296	d8 Nkx2-5 EmGFP	CLK	OK	8.01072	8.47859	0.0818929	0.0256817	0.96965	0.990528	no	0.46787	8468
XLOC_000217	XLOC_000217	Dnajb2	chr1:75236422-75245982	chr1	75236422	75245982	d8 Nkx2-5 EmGFP	CLK	OK	10.5633	2.92815	-1.851	-1.11462	0.2887	0.687593	no	7.63515	9560
XLOC_000218	XLOC_000218	Des	chr1:75357954-75367715	chr1	75357954	75367715	d8 Nkx2-5 EmGFP	CLK	OK	117.414	11.5879	-3.34091	-2.64584	0.0191	0.220883	no	105.826	9761
XLOC_000219	XLOC_000219	Speg	chr1:75375296-75432306	chr1	75375296	75432306	d8 Nkx2-5 EmGFP	CLK	OK	38.7118	3.74244	-3.37072	-1.88875	0.062	0.309276	no	34.9694	57010
XLOC_000220	XLOC_000220	Gmppa	chr1:75435942-75443177	chr1	75435942	75443177	d8 Nkx2-5 EmGFP	CLK	OK	27.0978	19.5024	-0.474522	-0.361959	0.72265	0.927548	no	7.5954	7235
XLOC_000221	XLOC_000221	Accn4	chr1:75447782-75474340	chr1	75447782	75474340	d8 Nkx2-5 EmGFP	CLK	OK	3.70671	0.00305547	-10.2445	-3.32676	0.1734	0.566291	no	3.70365	26558
XLOC_000222	XLOC_000222	Tmem198	chr1:75479531-75485693	chr1	75479531	75485693	d8 Nkx2-5 EmGFP	CLK	OK	0.476208	0.242197	-0.975414	-0.533651	0.68	0.909328	no	0.234011	6162
XLOC_000223	XLOC_000223	Inha	chr1:75485824-75510354	chr1	75485824	75510354	d8 Nkx2-5 EmGFP	CLK	OK	3.00227	0.104255	-4.84787	-0.128101	0.2949	0.693211	no	2.89802	24530
XLOC_000224	XLOC_000224	Stk11ip	chr1:75521528-75537335	chr1	75521528	75537335	d8 Nkx2-5 EmGFP	CLK	OK	10.5696	8.90525	-0.247192	-0.19071	0.8547	0.96397	no	1.66435	15807
XLOC_000225	XLOC_000225	Slc4a3	chr1:75546099-75561568	chr1	75546099	75561568	d8 Nkx2-5 EmGFP	CLK	OK	3.46054	2.17308	-0.671256	-0.435511	0.67805	0.908316	no	1.28746	15469
XLOC_000226	XLOC_000226	Gm17751	chr1:76489132-76502028	chr1	76489132	76502028	d8 Nkx2-5 EmGFP	CLK	NOTEST	0	0	0	0	1	1	no	0	12896
XLOC_000227	XLOC_000227	Sgpp2	chr1:78310345-78489088	chr1	78310345	78489088	d8 Nkx2-5 EmGFP	CLK	OK	0.346239	0.226682	-0.611099	-0.0411555	0.3896	0.758034	no	0.119557	178743
XLOC_000228	XLOC_000228	Mogat1	chr1:78511059-78538173	chr1	78511059	78538173	d8 Nkx2-5 EmGFP	CLK	OK	0	0.219466	inf	#NAME?	0.02145	0.231543	no	0.219466	27114
XLOC_000229	XLOC_000229	Acsl3,Utp14b	chr1:78657824-78707743	chr1	78657824	78707743	d8 Nkx2-5 EmGFP	CLK	OK	26.6529	16.2767	-0.711488	-0.619162	0.5717	0.863467	no	10.3762	49919
XLOC_000230	XLOC_000230	Kcne4	chr1:78816948-78820025	chr1	78816948	78820025	d8 Nkx2-5 EmGFP	CLK	OK	0.0835665	0	#NAME?	#NAME?	0.02165	0.231763	no	0.0835665	3077
XLOC_000231	XLOC_000231	Mrpl44	chr1:79776017-79781445	chr1	79776017	79781445	d8 Nkx2-5 EmGFP	CLK	OK	19.8969	35.3523	0.829258	0.72885	0.5522	0.85399	no	15.4554	5428
XLOC_000232	XLOC_000232	1700016L21Rik	chr1:80445931-80475660	chr1	80445931	80475660	d8 Nkx2-5 EmGFP	CLK	NOTEST	0	0	0	0	1	1	no	0	29729
XLOC_000233	XLOC_000233	9430031J16Rik	chr1:81077316-81271651	chr1	81077316	81271651	d8 Nkx2-5 EmGFP	CLK	NOTEST	0	0	0	0	1	1	no	0	194335
XLOC_000234	XLOC_000234	Rhbdd1	chr1:82316578-82445367	chr1	82316578	82445367	d8 Nkx2-5 EmGFP	CLK	OK	8.5869	3.39311	-1.33953	-0.905945	0.391	0.758689	no	5.19379	128789
XLOC_000235	XLOC_000235	Col4a3	chr1:82586920-82722059	chr1	82586920	82722059	d8 Nkx2-5 EmGFP	CLK	NOTEST	0.00789165	0.00413212	-0.933446	0	1	1	no	0.00375953	135139
XLOC_000236	XLOC_000236	Mff	chr1:82724561-82752389	chr1	82724561	82752389	d8 Nkx2-5 EmGFP	CLK	OK	27.8578	24.4923	-0.185749	-0.140858	0.8853	0.971752	no	3.3655	27828
XLOC_000237	XLOC_000237	Agfg1	chr1:82839028-82901127	chr1	82839028	82901127	d8 Nkx2-5 EmGFP	CLK	OK	19.2425	37.121	0.94794	0.733087	0.4655	0.804786	no	17.8785	62099
XLOC_000238	XLOC_000238	Ccl20	chr1:83116765-83119167	chr1	83116765	83119167	d8 Nkx2-5 EmGFP	CLK	OK	0	0.73147	inf	#NAME?	0.0083	0.152132	no	0.73147	2402
XLOC_000239	XLOC_000239	Wdr69	chr1:83159761-83210572	chr1	83159761	83210572	d8 Nkx2-5 EmGFP	CLK	NOTEST	0.0689989	0	#NAME?	0	1	1	no	0.0689989	50811
XLOC_000240	XLOC_000240	Mir5126	chr1:84369838-84696221	chr1	84369838	84696221	d8 Nkx2-5 EmGFP	CLK	NOTEST	0	0	0	0	1	1	no	0	326383
XLOC_000241	XLOC_000241	Fbxo36	chr1:84721188-84900486	chr1	84721188	84900486	d8 Nkx2-5 EmGFP	CLK	OK	7.75865	2.29297	-1.75859	-0.0862284	0.39165	0.758978	no	5.46568	179298
XLOC_000242	XLOC_000242	Gm7609	chr1:85111359-85275177	chr1	85111359	85275177	d8 Nkx2-5 EmGFP	CLK	OK	0.307883	0.259069	-0.249046	-0.120258	0.86985	0.968547	no	0.048814	163818
XLOC_000243	XLOC_000243	Gm7609	chr1:85111359-85275177	chr1	85111359	85275177	d8 Nkx2-5 EmGFP	CLK	NOTEST	0	0.0672089	inf	0	1	1	no	0.0672089	163818
XLOC_000244	XLOC_000244	Sp140	chr1:85576898-85645036	chr1	85576898	85645036	d8 Nkx2-5 EmGFP	CLK	OK	0.147535	0.876201	2.57021	1.03226	0.38355	0.75447	no	0.728666	68138
XLOC_000245	XLOC_000245	Sp100	chr1:85650005-85709448	chr1	85650005	85709448	d8 Nkx2-5 EmGFP	CLK	OK	0.0827101	0.00896281	-3.20604	-1.27991	0.24	0.649378	no	0.0737473	59443
XLOC_000246	XLOC_000246	Cab39	chr1:85793446-85851577	chr1	85793446	85851577	d8 Nkx2-5 EmGFP	CLK	OK	16.5036	18.7237	0.182083	0.176172	0.89105	0.972901	no	2.2201	58131
XLOC_000247	XLOC_000247	Itm2c	chr1:85894509-85908733	chr1	85894509	85908733	d8 Nkx2-5 EmGFP	CLK	OK	120.208	24.8169	-2.27613	-1.86226	0.08025	0.367369	no	95.3911	14224
XLOC_000248	XLOC_000248	4933407L21Rik	chr1:85928482-85931756	chr1	85928482	85931756	d8 Nkx2-5 EmGFP	CLK	NOTEST	0	0	0	0	1	1	no	0	3274
XLOC_000249	XLOC_000249	Spata3	chr1:86021941-86029958	chr1	86021941	86029958	d8 Nkx2-5 EmGFP	CLK	NOTEST	0	0.0282775	inf	0	1	1	no	0.0282775	8017
XLOC_000250	XLOC_000250	2810459M11Rik	chr1:86045862-86056176	chr1	86045862	86056176	d8 Nkx2-5 EmGFP	CLK	OK	0.47329	0.613783	0.375007	0.18333	0.85875	0.964861	no	0.140493	10314
XLOC_000251	XLOC_000251	Psmd1	chr1:86064618-86139295	chr1	86064618	86139295	d8 Nkx2-5 EmGFP	CLK	OK	46.8885	155.526	1.72985	1.58104	0.14495	0.515802	no	108.638	74677
XLOC_000252	XLOC_000252	Armc9	chr1:86154779-86278284	chr1	86154779	86278284	d8 Nkx2-5 EmGFP	CLK	OK	6.24074	9.96436	0.67506	0.438714	0.66695	0.90474	no	3.72362	123505
XLOC_000253	XLOC_000253	B3gnt7	chr1:86303220-86307305	chr1	86303220	86307305	d8 Nkx2-5 EmGFP	CLK	OK	4.05254	113.119	4.80287	3.7731	0.00815	0.150658	no	109.066	4085
XLOC_000254	XLOC_000254	C130036L24Rik	chr1:86359573-86367964	chr1	86359573	86367964	d8 Nkx2-5 EmGFP	CLK	OK	0.914245	0.395044	-1.21057	-0.683429	0.6071	0.879902	no	0.519201	8391
XLOC_000255	XLOC_000255	1700019O17Rik	chr1:86426328-86428049	chr1	86426328	86428049	d8 Nkx2-5 EmGFP	CLK	NOTEST	0.0178541	0.00344903	-2.372	0	1	1	no	0.0144051	1721
XLOC_000256	XLOC_000256	Ptma	chr1:86526735-86530698	chr1	86526735	86530698	d8 Nkx2-5 EmGFP	CLK	OK	171.297	1773.59	3.3721	3.2825	0.0115	0.17738	no	1602.29	3963
XLOC_000257	XLOC_000257	Cops7b	chr1:86543014-86606500	chr1	86543014	86606500	d8 Nkx2-5 EmGFP	CLK	OK	16.1017	19.0602	0.243352	0.158648	0.8743	0.969707	no	2.9585	63486
XLOC_000258	XLOC_000258	Dis3l2	chr1:86703803-87050097	chr1	86703803	87050097	d8 Nkx2-5 EmGFP	CLK	OK	10.2546	8.11784	-0.337101	-0.250173	0.804	0.951106	no	2.13676	346294
XLOC_000259	XLOC_000259	Akp3	chr1:87125007-87127912	chr1	87125007	87127912	d8 Nkx2-5 EmGFP	CLK	NOTEST	0	0.0159271	inf	0	1	1	no	0.0159271	2905
XLOC_000260	XLOC_000260	Prss56	chr1:87183492-87188404	chr1	87183492	87188404	d8 Nkx2-5 EmGFP	CLK	OK	0.00443345	0.129496	4.86833	2.17748	0.30675	0.702986	no	0.125063	4912
XLOC_000261	XLOC_000261	Chrnd	chr1:87190651-87200070	chr1	87190651	87200070	d8 Nkx2-5 EmGFP	CLK	NOTEST	0.0140725	0.0444786	1.66023	0	1	1	no	0.0304061	9419
XLOC_000262	XLOC_000262	Chrng	chr1:87205810-87211835	chr1	87205810	87211835	d8 Nkx2-5 EmGFP	CLK	OK	0.197332	0.0296711	-2.73349	-1.35918	0.33775	0.725658	no	0.167661	6025
XLOC_000263	XLOC_000263	Eif4e2	chr1:87213913-87240488	chr1	87213913	87240488	d8 Nkx2-5 EmGFP	CLK	OK	34.9338	99.4238	1.50897	1.22967	0.23345	0.642231	no	64.49	26575
XLOC_000264	XLOC_000264	Efhd1	chr1:87264309-87310835	chr1	87264309	87310835	d8 Nkx2-5 EmGFP	CLK	OK	0.123266	1.66002	3.75136	1.80663	0.14485	0.515598	no	1.53675	46526
XLOC_000265	XLOC_000265	Gigyf2	chr1:87326997-87450810	chr1	87326997	87450810	d8 Nkx2-5 EmGFP	CLK	OK	12.0669	23.381	0.954283	0.754731	0.43195	0.783769	no	11.3141	123813
XLOC_000266	XLOC_000266	3110079O15Rik	chr1:87469212-87475683	chr1	87469212	87475683	d8 Nkx2-5 EmGFP	CLK	OK	0.142934	0.241301	0.755489	0.323543	0.76915	0.942653	no	0.098367	6471
XLOC_000267	XLOC_000267	Neu2	chr1:87574026-87597840	chr1	87574026	87597840	d8 Nkx2-5 EmGFP	CLK	NOTEST	0.010954	0	#NAME?	0	1	1	no	0.010954	23814
XLOC_000268	XLOC_000268	-	chr1:87607615-87609922	chr1	87607615	87609922	d8 Nkx2-5 EmGFP	CLK	NOTEST	0	0	0	0	1	1	no	0	2307
XLOC_000269	XLOC_000269	Inpp5d	chr1:87620311-87720508	chr1	87620311	87720508	d8 Nkx2-5 EmGFP	CLK	OK	1.35526	13.0697	3.26958	2.12048	0.06105	0.305972	no	11.7144	100197
XLOC_000270	XLOC_000270	Atg16l1	chr1:87756010-87792428	chr1	87756010	87792428	d8 Nkx2-5 EmGFP	CLK	OK	6.92487	11.3053	0.707141	0.488981	0.60805	0.880374	no	4.38043	36418
XLOC_000271	XLOC_000271	Scarna6	chr1:87756010-87792428	chr1	87756010	87792428	d8 Nkx2-5 EmGFP	CLK	OK	5.07198	1.20067	-2.07871	-0.0911221	0.20225	0.60901	no	3.87131	36418
XLOC_000272	XLOC_000272	Sag	chr1:87803679-87845157	chr1	87803679	87845157	d8 Nkx2-5 EmGFP	CLK	NOTEST	0.0408682	0.00800489	-2.35202	0	1	1	no	0.0328633	41478
XLOC_000273	XLOC_000273	Dgkd	chr1:87853286-88008551	chr1	87853286	88008551	d8 Nkx2-5 EmGFP	CLK	OK	15.2912	18.8389	0.301009	0.225954	0.81755	0.955077	no	3.5477	155265
XLOC_000274	XLOC_000274	Ugt1a1,Ugt1a10,Ugt1a2,Ugt1a5,Ugt1a6a,Ugt1a6b,Ugt1a7c,Ugt1a9	chr1:88055410-88220002	chr1	88055410	88220002	d8 Nkx2-5 EmGFP	CLK	OK	0.310873	0.00934816	-5.0555	-0.546443	0.3025	0.699389	no	0.301525	164592
XLOC_000275	XLOC_000275	Heatr7b1	chr1:88227019-88277659	chr1	88227019	88277659	d8 Nkx2-5 EmGFP	CLK	OK	0.236494	0	#NAME?	#NAME?	0.12895	0.483766	no	0.236494	50640
XLOC_000276	XLOC_000276	Trpm8	chr1:88306711-88388851	chr1	88306711	88388851	d8 Nkx2-5 EmGFP	CLK	NOTEST	0.00216006	0	#NAME?	0	1	1	no	0.00216006	82140
XLOC_000277	XLOC_000277	Spp2	chr1:88407018-88426438	chr1	88407018	88426438	d8 Nkx2-5 EmGFP	CLK	OK	3.25585	0	#NAME?	#NAME?	0.0011	0.0469362	yes	3.25585	19420
XLOC_000278	XLOC_000278	Gm19589	chr1:88551516-88562166	chr1	88551516	88562166	d8 Nkx2-5 EmGFP	CLK	NOTEST	0	0.0237474	inf	0	1	1	no	0.0237474	10650
XLOC_000279	XLOC_000279	2410088K16Rik	chr1:88754889-88755733	chr1	88754889	88755733	d8 Nkx2-5 EmGFP	CLK	OK	0	5.25776	inf	#NAME?	0.00175	0.0610516	no	5.25776	844
XLOC_000280	XLOC_000280	1700067G17Rik	chr1:89016112-89022210	chr1	89016112	89022210	d8 Nkx2-5 EmGFP	CLK	NOTEST	0	0	0	0	1	1	no	0	6098
XLOC_000281	XLOC_000281	Sh3bp4	chr1:89070403-89155216	chr1	89070403	89155216	d8 Nkx2-5 EmGFP	CLK	OK	16.1542	16.7141	0.0491577	0.0394907	0.9691	0.99035	no	0.5599	84813
XLOC_000282	XLOC_000282	Agap1	chr1:89454810-89908750	chr1	89454810	89908750	d8 Nkx2-5 EmGFP	CLK	OK	5.45943	5.05288	-0.111646	-0.0846099	0.934	0.98349	no	0.40655	453940
XLOC_000283	XLOC_000283	Cxcr7	chr1:90204002-90216288	chr1	90204002	90216288	d8 Nkx2-5 EmGFP	CLK	OK	14.667	1.17428	-3.64272	-2.16025	0.06605	0.322319	no	13.4927	12286
XLOC_000284	XLOC_000284	-	chr1:90519273-90528751	chr1	90519273	90528751	d8 Nkx2-5 EmGFP	CLK	NOTEST	0.0260901	0.0705257	1.43465	0	1	1	no	0.0444356	9478
XLOC_000285	XLOC_000285	Cops8	chr1:90603424-90613341	chr1	90603424	90613341	d8 Nkx2-5 EmGFP	CLK	OK	54.6745	47.3342	-0.207984	-0.192337	0.86825	0.968105	no	7.3403	9917
XLOC_000286	XLOC_000286	Mlph	chr1:90915099-90951142	chr1	90915099	90951142	d8 Nkx2-5 EmGFP	CLK	OK	0.0943368	0.0710243	-0.409509	-0.1838	0.8656	0.967089	no	0.0233125	36043
XLOC_000287	XLOC_000287	Prlh	chr1:90953107-90954012	chr1	90953107	90954012	d8 Nkx2-5 EmGFP	CLK	NOTEST	0	0	0	0	1	1	no	0	905
XLOC_000288	XLOC_000288	Lrrfip1	chr1:90998726-91128944	chr1	90998726	91128944	d8 Nkx2-5 EmGFP	CLK	OK	20.1975	5.65411	-1.83681	-1.31855	0.20215	0.60886	no	14.5434	130218
XLOC_000289	XLOC_000289	Rbm44	chr1:91145102-91170795	chr1	91145102	91170795	d8 Nkx2-5 EmGFP	CLK	OK	0.0735733	0.323424	2.13618	1.03065	0.36655	0.744607	no	0.249851	25693
XLOC_000290	XLOC_000290	Ramp1	chr1:91179821-91225196	chr1	91179821	91225196	d8 Nkx2-5 EmGFP	CLK	OK	1.66862	0.0294443	-5.82453	-2.67365	0.05475	0.28546	no	1.63918	45375
XLOC_000291	XLOC_000291	Ube2f	chr1:91250269-91290336	chr1	91250269	91290336	d8 Nkx2-5 EmGFP	CLK	OK	9.81503	25.5062	1.37778	0.894217	0.37885	0.75181	no	15.6912	40067
XLOC_000292	XLOC_000292	Scly	chr1:91298337-91321080	chr1	91298337	91321080	d8 Nkx2-5 EmGFP	CLK	OK	11.0668	14.1916	0.358805	0.25453	0.79935	0.949961	no	3.1248	22743
XLOC_000293	XLOC_000293	Espnl	chr1:91322074-91348312	chr1	91322074	91348312	d8 Nkx2-5 EmGFP	CLK	OK	0.0751452	0.220302	1.55173	0.751408	0.50975	0.831477	no	0.145157	26238
XLOC_000294	XLOC_000294	Klhl30	chr1:91351072-91362404	chr1	91351072	91362404	d8 Nkx2-5 EmGFP	CLK	OK	6.34551	0.0873125	-6.1834	-3.52584	0.0365	0.255134	no	6.2582	11332
XLOC_000295	XLOC_000295	Fam132b	chr1:91366429-91398790	chr1	91366429	91398790	d8 Nkx2-5 EmGFP	CLK	OK	1.0885	2.0566	0.91792	0.221076	0.8425	0.961098	no	0.9681	32361
XLOC_000296	XLOC_000296	Traf3ip1	chr1:91494667-91529307	chr1	91494667	91529307	d8 Nkx2-5 EmGFP	CLK	OK	1.58967	4.19816	1.40102	0.792023	0.42105	0.777912	no	2.60849	34640
XLOC_000297	XLOC_000297	Asb1	chr1:91540378-91559763	chr1	91540378	91559763	d8 Nkx2-5 EmGFP	CLK	OK	4.02303	2.18251	-0.882296	-0.588774	0.5696	0.862444	no	1.84052	19385
XLOC_000298	XLOC_000298	Twist2	chr1:91801476-91848027	chr1	91801476	91848027	d8 Nkx2-5 EmGFP	CLK	OK	40.6309	0.968434	-5.39078	-3.88006	0.02175	0.232137	no	39.6625	46551
XLOC_000299	XLOC_000299	Olfr1413	chr1:92573124-92574206	chr1	92573124	92574206	d8 Nkx2-5 EmGFP	CLK	NOTEST	0	0	0	0	1	1	no	0	1082
XLOC_000300	XLOC_000300	Olfr1412	chr1:92588331-92589297	chr1	92588331	92589297	d8 Nkx2-5 EmGFP	CLK	NOTEST	0	0	0	0	1	1	no	0	966
XLOC_000301	XLOC_000301	Olfr1411	chr1:92596520-92597492	chr1	92596520	92597492	d8 Nkx2-5 EmGFP	CLK	NOTEST	0	0	0	0	1	1	no	0	972
XLOC_000302	XLOC_000302	Olfr1410	chr1:92607838-92608807	chr1	92607838	92608807	d8 Nkx2-5 EmGFP	CLK	NOTEST	0	0	0	0	1	1	no	0	969
XLOC_000303	XLOC_000303	Olfr12	chr1:92619880-92621001	chr1	92619880	92621001	d8 Nkx2-5 EmGFP	CLK	NOTEST	0	0	0	0	1	1	no	0	1121
XLOC_000304	XLOC_000304	Gpc1	chr1:92831685-92860196	chr1	92831685	92860196	d8 Nkx2-5 EmGFP	CLK	OK	60.4484	20.9686	-1.52747	-1.29493	0.2116	0.620253	no	39.4798	28511
XLOC_000305	XLOC_000305	Mir149	chr1:92831685-92860196	chr1	92831685	92860196	d8 Nkx2-5 EmGFP	CLK	NOTEST	0	0	0	0	1	1	no	0	28511
XLOC_000306	XLOC_000306	Dusp28	chr1:92906988-92908620	chr1	92906988	92908620	d8 Nkx2-5 EmGFP	CLK	OK	3.1468	1.84766	-0.768186	-0.499407	0.7162	0.924967	no	1.29914	1632
XLOC_000307	XLOC_000307	Rnpepl1	chr1:92910824-92925759	chr1	92910824	92925759	d8 Nkx2-5 EmGFP	CLK	OK	25.5092	18.0898	-0.495842	-0.393177	0.7041	0.920099	no	7.4194	14935
XLOC_000308	XLOC_000308	Capn10	chr1:92933542-92950590	chr1	92933542	92950590	d8 Nkx2-5 EmGFP	CLK	OK	9.6248	9.61919	-0.000840575	-0.000588547	0.999	0.999247	no	0.00561	17048
XLOC_000309	XLOC_000309	Gpr35	chr1:92973118-92986391	chr1	92973118	92986391	d8 Nkx2-5 EmGFP	CLK	NOTEST	0.0446039	0.072661	0.70401	0	1	1	no	0.0280571	13273
XLOC_000310	XLOC_000310	Aqp12	chr1:93006333-93012269	chr1	93006333	93012269	d8 Nkx2-5 EmGFP	CLK	NOTEST	0	0	0	0	1	1	no	0	5936
XLOC_000311	XLOC_000311	Agxt	chr1:93135275-93145421	chr1	93135275	93145421	d8 Nkx2-5 EmGFP	CLK	NOTEST	0	0.00872448	inf	0	1	1	no	0.00872448	10146
XLOC_000312	XLOC_000312	-	chr1:93189336-93191085	chr1	93189336	93191085	d8 Nkx2-5 EmGFP	CLK	OK	0.0413314	0.275136	2.73484	1.24946	0.31555	0.710406	no	0.233805	1749
XLOC_000313	XLOC_000313	-	chr1:93193042-93201606	chr1	93193042	93201606	d8 Nkx2-5 EmGFP	CLK	OK	0.0213894	0.220491	3.36575	1.19847	0.3146	0.70972	no	0.199102	8564
XLOC_000314	XLOC_000314	-	chr1:93206838-93231033	chr1	93206838	93231033	d8 Nkx2-5 EmGFP	CLK	OK	0.019865	1.07778	5.76169	2.66668	0.0621	0.309469	no	1.05791	24195
XLOC_000315	XLOC_000315	Sned1	chr1:93235837-93306188	chr1	93235837	93306188	d8 Nkx2-5 EmGFP	CLK	OK	0.663121	1.64708	1.31256	0.448398	0.67015	0.905873	no	0.983959	70351
XLOC_000316	XLOC_000316	Ppp1r7	chr1:93308430-93373454	chr1	93308430	93373454	d8 Nkx2-5 EmGFP	CLK	OK	11.5473	30.6123	1.40656	0.902098	0.3965	0.762262	no	19.065	65024
XLOC_000317	XLOC_000317	Ano7	chr1:93373895-93404306	chr1	93373895	93404306	d8 Nkx2-5 EmGFP	CLK	OK	0.0350127	0.174153	2.3144	1.07998	0.33485	0.723787	no	0.13914	30411
XLOC_000318	XLOC_000318	2013-09-02	chr1:93478992-93509732	chr1	93478992	93509732	d8 Nkx2-5 EmGFP	CLK	OK	96.7114	28.0426	-1.78606	-1.49564	0.13995	0.505486	no	68.6688	30740
XLOC_000319	XLOC_000319	Farp2	chr1:93512102-93635727	chr1	93512102	93635727	d8 Nkx2-5 EmGFP	CLK	OK	3.37093	0.645565	-2.38451	-0.885421	0.4821	0.815079	no	2.72537	123625
XLOC_000320	XLOC_000320	Bok	chr1:93685693-93695762	chr1	93685693	93695762	d8 Nkx2-5 EmGFP	CLK	OK	23.7853	18.8934	-0.332185	-0.273475	0.81615	0.954473	no	4.8919	10069
XLOC_000321	XLOC_000321	Atg4b	chr1:93705390-93790362	chr1	93705390	93790362	d8 Nkx2-5 EmGFP	CLK	OK	26.1413	17.6455	-0.567035	-0.344523	0.7378	0.932315	no	8.4958	84972
XLOC_000322	XLOC_000322	Ing5	chr1:93802164-93822100	chr1	93802164	93822100	d8 Nkx2-5 EmGFP	CLK	OK	6.94112	8.87157	0.354021	0.265714	0.796	0.949015	no	1.93045	19936
XLOC_000323	XLOC_000323	D2hgdh,Gm9994	chr1:93825239-93988736	chr1	93825239	93988736	d8 Nkx2-5 EmGFP	CLK	OK	7.02378	7.0417	0.00367641	0.00213248	0.99855	0.999127	no	0.01792	163497
XLOC_000324	XLOC_000324	Gal3st2	chr1:93825239-93988736	chr1	93825239	93988736	d8 Nkx2-5 EmGFP	CLK	NOTEST	0	0.00945903	inf	0	1	1	no	0.00945903	163497
XLOC_000325	XLOC_000325	Gm6086	chr1:93990508-94011539	chr1	93990508	94011539	d8 Nkx2-5 EmGFP	CLK	OK	0.0105608	0.248285	4.5552	2.04947	0.28245	0.682058	no	0.237724	21031
XLOC_000326	XLOC_000326	Neu4	chr1:94020492-94028330	chr1	94020492	94028330	d8 Nkx2-5 EmGFP	CLK	NOTEST	0.00189922	0	#NAME?	0	1	1	no	0.00189922	7838
XLOC_000327	XLOC_000327	4930440C22Rik	chr1:94797441-94802472	chr1	94797441	94802472	d8 Nkx2-5 EmGFP	CLK	NOTEST	0	0	0	0	1	1	no	0	5031
XLOC_000328	XLOC_000328	Fam174a	chr1:95313627-95335284	chr1	95313627	95335284	d8 Nkx2-5 EmGFP	CLK	OK	6.81155	1.83586	-1.89153	-1.51259	0.34035	0.727532	no	4.97569	21657
XLOC_000329	XLOC_000329	Gin1	chr1:97706045-97793082	chr1	97706045	97793082	d8 Nkx2-5 EmGFP	CLK	OK	1.22666	1.68854	0.461039	0.0797891	0.8459	0.961755	no	0.46188	87037
XLOC_000330	XLOC_000330	1810006J02Rik	chr1:98131466-98144655	chr1	98131466	98144655	d8 Nkx2-5 EmGFP	CLK	NOTEST	0	0	0	0	1	1	no	0	13189
XLOC_000331	XLOC_000331	Slco6d1	chr1:98421123-98509380	chr1	98421123	98509380	d8 Nkx2-5 EmGFP	CLK	NOTEST	0	0	0	0	1	1	no	0	88257
XLOC_000332	XLOC_000332	-	chr1:98605719-98607363	chr1	98605719	98607363	d8 Nkx2-5 EmGFP	CLK	NOTEST	0	0	0	0	1	1	no	0	1644
XLOC_000333	XLOC_000333	Cntnap5b	chr1:99772764-100485942	chr1	99772764	100485942	d8 Nkx2-5 EmGFP	CLK	NOTEST	0.0589563	0	#NAME?	0	1	1	no	0.0589563	713178
XLOC_000334	XLOC_000334	Gm20268	chr1:101155767-101175202	chr1	101155767	101175202	d8 Nkx2-5 EmGFP	CLK	NOTEST	0	0	0	0	1	1	no	0	19435
XLOC_000335	XLOC_000335	Cdh20	chr1:104768818-104995481	chr1	104768818	104995481	d8 Nkx2-5 EmGFP	CLK	NOTEST	0.0633171	0.0220223	-1.52363	0	1	1	no	0.0412948	226663
XLOC_000336	XLOC_000336	2310035C23Rik	chr1:105663860-105755164	chr1	105663860	105755164	d8 Nkx2-5 EmGFP	CLK	OK	4.35574	3.86532	-0.172331	-0.119428	0.90995	0.97763	no	0.49042	91304
XLOC_000337	XLOC_000337	Tnfrsf11a	chr1:105780722-105851793	chr1	105780722	105851793	d8 Nkx2-5 EmGFP	CLK	OK	0.154033	0.560564	1.86364	0.757406	0.4427	0.789733	no	0.406531	71071
XLOC_000338	XLOC_000338	-	chr1:105862986-105878235	chr1	105862986	105878235	d8 Nkx2-5 EmGFP	CLK	NOTEST	0	0	0	0	1	1	no	0	15249
XLOC_000339	XLOC_000339	Zcchc2	chr1:105977553-106034079	chr1	105977553	106034079	d8 Nkx2-5 EmGFP	CLK	OK	2.95636	6.30042	1.09163	0.775192	0.45095	0.795024	no	3.34406	56526
XLOC_000340	XLOC_000340	Phlpp1	chr1:106171743-106394245	chr1	106171743	106394245	d8 Nkx2-5 EmGFP	CLK	OK	5.25263	8.415	0.679924	0.172444	0.65755	0.900681	no	3.16237	222502
XLOC_000341	XLOC_000341	Serpinb5	chr1:106861179-106883348	chr1	106861179	106883348	d8 Nkx2-5 EmGFP	CLK	NOTEST	0.0154111	0.0365362	1.24535	0	1	1	no	0.0211251	22169
XLOC_000342	XLOC_000342	Serpinb12	chr1:106934448-106957080	chr1	106934448	106957080	d8 Nkx2-5 EmGFP	CLK	NOTEST	0.0170953	0	#NAME?	0	1	1	no	0.0170953	22632
XLOC_000343	XLOC_000343	Serpinb13	chr1:106980983-107001195	chr1	106980983	107001195	d8 Nkx2-5 EmGFP	CLK	NOTEST	0.00602734	0	#NAME?	0	1	1	no	0.00602734	20212
XLOC_000344	XLOC_000344	Serpinb11	chr1:107362313-107380475	chr1	107362313	107380475	d8 Nkx2-5 EmGFP	CLK	NOTEST	0.022798	0	#NAME?	0	1	1	no	0.022798	18162
XLOC_000345	XLOC_000345	Serpinb7	chr1:107422688-107452689	chr1	107422688	107452689	d8 Nkx2-5 EmGFP	CLK	NOTEST	0	0	0	0	1	1	no	0	30001
XLOC_000346	XLOC_000346	Serpinb2	chr1:107511422-107525600	chr1	107511422	107525600	d8 Nkx2-5 EmGFP	CLK	NOTEST	0.0147275	0	#NAME?	0	1	1	no	0.0147275	14178
XLOC_000347	XLOC_000347	Serpinb10-ps	chr1:107529002-107558974	chr1	107529002	107558974	d8 Nkx2-5 EmGFP	CLK	NOTEST	0.00305107	0.00869955	1.51162	0	1	1	no	0.00564848	29972
XLOC_000348	XLOC_000348	Serpinb8	chr1:107590005-107608978	chr1	107590005	107608978	d8 Nkx2-5 EmGFP	CLK	OK	0.213999	0.217908	0.0261157	0.0109921	0.99095	0.996803	no	0.003909	18973
XLOC_000349	XLOC_000349	Cdh7	chr1:109983736-110139001	chr1	109983736	110139001	d8 Nkx2-5 EmGFP	CLK	NOTEST	0.024292	0.00632197	-1.94203	0	1	1	no	0.01797	155265
XLOC_000350	XLOC_000350	Cntnap5a	chr1:115684791-116583335	chr1	115684791	116583335	d8 Nkx2-5 EmGFP	CLK	OK	0.383461	0	#NAME?	#NAME?	0.0009	0.040999	yes	0.383461	898544
XLOC_000351	XLOC_000351	Mki67ip	chr1:118321842-118333831	chr1	118321842	118333831	d8 Nkx2-5 EmGFP	CLK	OK	24.8734	83.8259	1.75279	1.62022	0.1802	0.577183	no	58.9525	11989
XLOC_000352	XLOC_000352	Clasp1	chr1:118388002-118612844	chr1	118388002	118612844	d8 Nkx2-5 EmGFP	CLK	OK	12.6535	18.4812	0.54652	0.45481	0.6523	0.898925	no	5.8277	224842
XLOC_000353	XLOC_000353	Tfcp2l1	chr1:118627944-118685168	chr1	118627944	118685168	d8 Nkx2-5 EmGFP	CLK	OK	2.00847	43.5059	4.43704	3.88867	0.00715	0.140664	no	41.4974	57224
XLOC_000354	XLOC_000354	-	chr1:119305593-119320591	chr1	119305593	119320591	d8 Nkx2-5 EmGFP	CLK	OK	0	0.375716	inf	#NAME?	0.00875	0.154774	no	0.375716	14998
XLOC_000355	XLOC_000355	Tmem185b	chr1:119526153-119528983	chr1	119526153	119528983	d8 Nkx2-5 EmGFP	CLK	OK	6.10959	7.44923	0.286015	0.248014	0.85295	0.963825	no	1.33964	2830
XLOC_000356	XLOC_000356	Sctr	chr1:120006979-120063532	chr1	120006979	120063532	d8 Nkx2-5 EmGFP	CLK	NOTEST	0.00497128	0	#NAME?	0	1	1	no	0.00497128	56553
XLOC_000357	XLOC_000357	3110009E18Rik	chr1:120121185-120188189	chr1	120121185	120188189	d8 Nkx2-5 EmGFP	CLK	OK	6.5362	14.1932	1.11868	0.573851	0.5996	0.876502	no	7.657	67004
XLOC_000358	XLOC_000358	C1ql2	chr1:120340581-120343174	chr1	120340581	120343174	d8 Nkx2-5 EmGFP	CLK	OK	0.114948	0.0865586	-0.409235	-0.201547	0.87065	0.968662	no	0.0283894	2593
XLOC_000359	XLOC_000359	En1	chr1:120602486-120607991	chr1	120602486	120607991	d8 Nkx2-5 EmGFP	CLK	OK	0.209345	1.81528	3.11623	1.91071	0.19195	0.594408	no	1.60594	5505
XLOC_000360	XLOC_000360	B230209K01Rik	chr1:121087404-121120975	chr1	121087404	121120975	d8 Nkx2-5 EmGFP	CLK	NOTEST	0.0251189	0	#NAME?	0	1	1	no	0.0251189	33571
XLOC_000361	XLOC_000361	Ccdc93	chr1:121431032-121507240	chr1	121431032	121507240	d8 Nkx2-5 EmGFP	CLK	OK	4.21268	4.30877	0.0325399	0.0242615	0.981	0.993502	no	0.09609	76208
XLOC_000362	XLOC_000362	Slc35f5	chr1:125560593-125595684	chr1	125560593	125595684	d8 Nkx2-5 EmGFP	CLK	OK	13.8573	8.46306	-0.71139	-0.502441	0.63065	0.889799	no	5.39424	35091
XLOC_000363	XLOC_000363	Gpr39	chr1:125676995-125912214	chr1	125676995	125912214	d8 Nkx2-5 EmGFP	CLK	OK	0.459884	0.0642498	-2.8395	-0.639449	0.45675	0.799207	no	0.395634	235219
XLOC_000364	XLOC_000364	Mgat5	chr1:127204697-127488554	chr1	127204697	127488554	d8 Nkx2-5 EmGFP	CLK	OK	1.411	1.99637	0.500656	0.287205	0.76585	0.941826	no	0.58537	283857
XLOC_000365	XLOC_000365	Acmsd	chr1:127729412-127808062	chr1	127729412	127808062	d8 Nkx2-5 EmGFP	CLK	NOTEST	0.0125213	0	#NAME?	0	1	1	no	0.0125213	78650
XLOC_000366	XLOC_000366	Ccnt2	chr1:127729412-127808062	chr1	127729412	127808062	d8 Nkx2-5 EmGFP	CLK	OK	8.84179	15.0346	0.765874	0.583146	0.5596	0.857695	no	6.19281	78650
XLOC_000367	XLOC_000367	Rab3gap1	chr1:127868772-127943876	chr1	127868772	127943876	d8 Nkx2-5 EmGFP	CLK	OK	8.2829	13.809	0.737405	0.590641	0.5905	0.8724	no	5.5261	75104
XLOC_000368	XLOC_000368	R3hdm1	chr1:128103298-128237735	chr1	128103298	128237735	d8 Nkx2-5 EmGFP	CLK	OK	13.9207	9.67197	-0.525353	-0.408754	0.6891	0.913039	no	4.24873	134437
XLOC_000369	XLOC_000369	Mir128-1	chr1:128103298-128237735	chr1	128103298	128237735	d8 Nkx2-5 EmGFP	CLK	NOTEST	0	0	0	0	1	1	no	0	134437
XLOC_000370	XLOC_000370	Ubxn4	chr1:128244180-128279377	chr1	128244180	128279377	d8 Nkx2-5 EmGFP	CLK	OK	13.4	11.2364	-0.254051	-0.2079	0.8485	0.962847	no	2.1636	35197
XLOC_000371	XLOC_000371	Thsd7b	chr1:129273303-130219278	chr1	129273303	130219278	d8 Nkx2-5 EmGFP	CLK	NOTEST	0.0281796	0.00524574	-2.42543	0	1	1	no	0.0229339	945975
XLOC_000372	XLOC_000372	Yod1	chr1:130689042-130729253	chr1	130689042	130729253	d8 Nkx2-5 EmGFP	CLK	OK	0.976236	0.327205	-1.57704	-0.471395	0.65945	0.901362	no	0.649031	40211
XLOC_000373	XLOC_000373	AA986860	chr1:130731975-130744622	chr1	130731975	130744622	d8 Nkx2-5 EmGFP	CLK	OK	0.75043	0.907338	0.273923	0.12942	0.8996	0.975001	no	0.156908	12647
XLOC_000374	XLOC_000374	Fcamr	chr1:130800901-130814740	chr1	130800901	130814740	d8 Nkx2-5 EmGFP	CLK	NOTEST	0	0	0	0	1	1	no	0	13839
XLOC_000375	XLOC_000375	Pigr	chr1:130826683-130852249	chr1	130826683	130852249	d8 Nkx2-5 EmGFP	CLK	NOTEST	0.00797736	0.00155287	-2.36097	0	1	1	no	0.00642449	25566
XLOC_000376	XLOC_000376	Faim3	chr1:130865776-130880790	chr1	130865776	130880790	d8 Nkx2-5 EmGFP	CLK	NOTEST	0.0400674	0.0311464	-0.363361	0	1	1	no	0.008921	15014
XLOC_000377	XLOC_000377	Il10	chr1:131019844-131024970	chr1	131019844	131024970	d8 Nkx2-5 EmGFP	CLK	NOTEST	0.00795078	0.0126079	0.665157	0	1	1	no	0.00465712	5126
XLOC_000378	XLOC_000378	Eif2d	chr1:131153177-131245178	chr1	131153177	131245178	d8 Nkx2-5 EmGFP	CLK	OK	23.9073	111.986	2.2278	1.69241	0.11805	0.463433	no	88.0787	92001
XLOC_000379	XLOC_000379	Fam72a	chr1:131285250-131539872	chr1	131285250	131539872	d8 Nkx2-5 EmGFP	CLK	OK	1.36044	5.09785	1.90582	0.350528	0.72235	0.927543	no	3.73741	254622
XLOC_000380	XLOC_000380	Avpr1b	chr1:131599113-131612000	chr1	131599113	131612000	d8 Nkx2-5 EmGFP	CLK	NOTEST	0.0460703	0.00501208	-3.20036	0	1	1	no	0.0410582	12887
XLOC_000381	XLOC_000381	Ctse	chr1:131638313-131675507	chr1	131638313	131675507	d8 Nkx2-5 EmGFP	CLK	OK	2.11382	0.00312474	-9.4019	-3.52008	0.25165	0.657108	no	2.1107	37194
XLOC_000382	XLOC_000382	5430435G22Rik	chr1:131688693-131713658	chr1	131688693	131713658	d8 Nkx2-5 EmGFP	CLK	OK	0.427244	0.101843	-2.06872	-0.993499	0.37895	0.75191	no	0.325401	24965
XLOC_000383	XLOC_000383	Slc26a9	chr1:131744021-131770405	chr1	131744021	131770405	d8 Nkx2-5 EmGFP	CLK	NOTEST	0.0592724	0.0749813	0.339171	0	1	1	no	0.0157089	26384
XLOC_000384	XLOC_000384	Pm20d1	chr1:131797394-131818115	chr1	131797394	131818115	d8 Nkx2-5 EmGFP	CLK	OK	1.90031	2.26199	0.251357	0.155045	0.89415	0.973689	no	0.36168	20721
XLOC_000385	XLOC_000385	Slc41a1	chr1:131828011-131848864	chr1	131828011	131848864	d8 Nkx2-5 EmGFP	CLK	OK	6.2404	5.51097	-0.179333	-0.135241	0.9033	0.976029	no	0.72943	20853
XLOC_000386	XLOC_000386	Rab7l1	chr1:131867276-131872889	chr1	131867276	131872889	d8 Nkx2-5 EmGFP	CLK	OK	0.913689	1.46315	0.6793	0.368621	0.7629	0.941001	no	0.549461	5613
XLOC_000387	XLOC_000387	Nucks1	chr1:131910457-131936321	chr1	131910457	131936321	d8 Nkx2-5 EmGFP	CLK	OK	43.3631	46.3352	0.0956414	0.0829304	0.9342	0.98349	no	2.9721	25864
XLOC_000388	XLOC_000388	Slc45a3	chr1:131962912-131982964	chr1	131962912	131982964	d8 Nkx2-5 EmGFP	CLK	OK	0.432112	0.61923	0.519069	0.258656	0.81255	0.95326	no	0.187118	20052
XLOC_000389	XLOC_000389	Elk4	chr1:132007604-132068062	chr1	132007604	132068062	d8 Nkx2-5 EmGFP	CLK	OK	2.75657	0.729545	-1.9178	-1.33427	0.2766	0.677004	no	2.02703	60458
XLOC_000390	XLOC_000390	Lemd1,Mir135b	chr1:132190566-132257382	chr1	132190566	132257382	d8 Nkx2-5 EmGFP	CLK	OK	0.0545732	2.01723	5.20804	2.70169	0.0514	0.279209	no	1.96266	66816
XLOC_000391	XLOC_000391	Lemd1	chr1:132190566-132257382	chr1	132190566	132257382	d8 Nkx2-5 EmGFP	CLK	OK	0.0179419	0.200167	3.4798	0.300666	0.40235	0.766533	no	0.182225	66816
XLOC_000392	XLOC_000392	Mir135b	chr1:132190566-132257382	chr1	132190566	132257382	d8 Nkx2-5 EmGFP	CLK	OK	0.0294997	0.544756	4.20684	0.542744	0.54735	0.851017	no	0.515256	66816
XLOC_000393	XLOC_000393	Klhdc8a	chr1:132292862-132307357	chr1	132292862	132307357	d8 Nkx2-5 EmGFP	CLK	OK	0.404196	0.191977	-1.07412	-0.534302	0.6279	0.889113	no	0.212219	14495
XLOC_000394	XLOC_000394	Nuak2	chr1:132316124-132333488	chr1	132316124	132333488	d8 Nkx2-5 EmGFP	CLK	OK	1.17968	5.46777	2.21256	1.29997	0.23495	0.643779	no	4.28809	17364
XLOC_000395	XLOC_000395	-	chr1:132342014-132351362	chr1	132342014	132351362	d8 Nkx2-5 EmGFP	CLK	OK	0.205836	0.00146482	-7.13462	-0.73915	0.1712	0.563385	no	0.204371	9348
XLOC_000396	XLOC_000396	Dstyk	chr1:132417452-132508639	chr1	132417452	132508639	d8 Nkx2-5 EmGFP	CLK	OK	3.72714	1.1546	-1.69068	-0.58837	0.5943	0.874086	no	2.57254	91187
XLOC_000397	XLOC_000397	Rbbp5,Tmem81	chr1:132417452-132508639	chr1	132417452	132508639	d8 Nkx2-5 EmGFP	CLK	OK	7.52661	17.6009	1.22558	0.864453	0.45155	0.79548	no	10.0743	91187
XLOC_000398	XLOC_000398	Gm10538	chr1:132564689-132742012	chr1	132564689	132742012	d8 Nkx2-5 EmGFP	CLK	NOTEST	0	0.0269065	inf	0	1	1	no	0.0269065	177323
XLOC_000399	XLOC_000399	Lrrn2	chr1:132880354-132940005	chr1	132880354	132940005	d8 Nkx2-5 EmGFP	CLK	OK	0.8866	1.40356	0.662734	0.344993	0.75175	0.937068	no	0.51696	59651
XLOC_000400	XLOC_000400	Pik3c2b	chr1:133046011-133108688	chr1	133046011	133108688	d8 Nkx2-5 EmGFP	CLK	OK	1.49638	0.637079	-1.23193	-0.722101	0.4838	0.816178	no	0.859301	62677
XLOC_000401	XLOC_000401	Ppp1r15b	chr1:133131165-133139800	chr1	133131165	133139800	d8 Nkx2-5 EmGFP	CLK	OK	19.5467	34.6853	0.8274	0.80095	0.49835	0.825519	no	15.1386	8635
XLOC_000402	XLOC_000402	Plekha6	chr1:133164512-133303435	chr1	133164512	133303435	d8 Nkx2-5 EmGFP	CLK	OK	10.5558	0.726045	-3.86183	-2.14203	0.0493	0.271228	no	9.82975	138923
XLOC_000403	XLOC_000403	Golt1a,Kiss1	chr1:133309797-133329722	chr1	133309797	133329722	d8 Nkx2-5 EmGFP	CLK	OK	0.423818	0.00573428	-6.20769	-1.25512	0.1879	0.588266	no	0.418084	19925
XLOC_000404	XLOC_000404	Ren1,Ren2	chr1:133350565-133360323	chr1	133350565	133360323	d8 Nkx2-5 EmGFP	CLK	OK	0.0331673	0.142077	2.09884	0.930165	0.42625	0.78107	no	0.10891	9758
XLOC_000405	XLOC_000405	Etnk2	chr1:133363571-133380319	chr1	133363571	133380319	d8 Nkx2-5 EmGFP	CLK	OK	2.8938	5.42976	0.907925	0.578575	0.60845	0.880607	no	2.53596	16748
XLOC_000406	XLOC_000406	Fmod	chr1:134037514-134048277	chr1	134037514	134048277	d8 Nkx2-5 EmGFP	CLK	OK	4.60627	0.00235421	-10.9341	-4.31072	0.25055	0.656973	no	4.60392	10763
XLOC_000407	XLOC_000407	Chit1	chr1:134111241-134151436	chr1	134111241	134151436	d8 Nkx2-5 EmGFP	CLK	OK	0	0.18515	inf	#NAME?	0.0138	0.193063	no	0.18515	40195
XLOC_000408	XLOC_000408	Chi3l1	chr1:134182403-134190031	chr1	134182403	134190031	d8 Nkx2-5 EmGFP	CLK	OK	0.394054	0.134127	-1.5548	-0.78714	0.53085	0.842434	no	0.259927	7628
XLOC_000409	XLOC_000409	Mybph	chr1:134193418-134235431	chr1	134193418	134235431	d8 Nkx2-5 EmGFP	CLK	OK	0.991637	0.0255338	-5.27933	-0.758957	0.39265	0.759531	no	0.966103	42013
XLOC_000410	XLOC_000410	Myog	chr1:134290003-134292548	chr1	134290003	134292548	d8 Nkx2-5 EmGFP	CLK	NOTEST	0.00587262	0.0277631	2.24109	0	1	1	no	0.0218905	2545
XLOC_000411	XLOC_000411	4933406M09Rik	chr1:134385939-134390983	chr1	134385939	134390983	d8 Nkx2-5 EmGFP	CLK	NOTEST	0	0.0230361	inf	0	1	1	no	0.0230361	5044
XLOC_000412	XLOC_000412	Cyb5r1	chr1:134405989-134411738	chr1	134405989	134411738	d8 Nkx2-5 EmGFP	CLK	OK	21.5178	27.7498	0.366948	0.313826	0.78695	0.946973	no	6.232	5749
XLOC_000413	XLOC_000413	Adipor1	chr1:134415463-134433352	chr1	134415463	134433352	d8 Nkx2-5 EmGFP	CLK	OK	67.9732	80.1952	0.23855	0.203346	0.84145	0.96084	no	12.222	17889
XLOC_000414	XLOC_000414	Klhl12	chr1:134455541-134490945	chr1	134455541	134490945	d8 Nkx2-5 EmGFP	CLK	OK	4.32694	8.97423	1.05244	0.725528	0.4849	0.816897	no	4.64729	35404
XLOC_000415	XLOC_000415	Rabif	chr1:134494659-134507884	chr1	134494659	134507884	d8 Nkx2-5 EmGFP	CLK	OK	10.0381	22.3407	1.15419	1.00709	0.4425	0.789581	no	12.3026	13225
XLOC_000416	XLOC_000416	Kdm5b	chr1:134560177-134632878	chr1	134560177	134632878	d8 Nkx2-5 EmGFP	CLK	OK	47.7715	137.565	1.52589	1.39957	0.20125	0.607386	no	89.7935	72701
XLOC_000417	XLOC_000417	Syt2	chr1:134646680-134749417	chr1	134646680	134749417	d8 Nkx2-5 EmGFP	CLK	NOTEST	0.00245728	0.0345552	3.81377	0	1	1	no	0.0320979	102737
XLOC_000418	XLOC_000418	Ube2t	chr1:134962555-134974137	chr1	134962555	134974137	d8 Nkx2-5 EmGFP	CLK	OK	10.1356	14.8721	0.553174	0.33431	0.74775	0.935911	no	4.7365	11582
XLOC_000419	XLOC_000419	Ptpn7	chr1:135132628-135145320	chr1	135132628	135145320	d8 Nkx2-5 EmGFP	CLK	OK	0.145592	0.499837	1.77953	0.872767	0.42595	0.780898	no	0.354245	12692
XLOC_000420	XLOC_000420	Arl8a	chr1:135146833-135156268	chr1	135146833	135156268	d8 Nkx2-5 EmGFP	CLK	OK	32.0166	17.2865	-0.889177	-0.73602	0.5162	0.834522	no	14.7301	9435
XLOC_000421	XLOC_000421	-	chr1:135232032-135233414	chr1	135232032	135233414	d8 Nkx2-5 EmGFP	CLK	OK	273.089	10.2924	-4.72973	-2.88911	0.0297	0.251368	no	262.797	1382
XLOC_000422	XLOC_000422	Lmod1	chr1:135324812-135368065	chr1	135324812	135368065	d8 Nkx2-5 EmGFP	CLK	OK	1.52523	0.199007	-2.93814	-1.35658	0.17885	0.574954	no	1.32622	43253
XLOC_000423	XLOC_000423	Csrp1	chr1:135729196-135752229	chr1	135729196	135752229	d8 Nkx2-5 EmGFP	CLK	OK	293.788	78.512	-1.90379	-1.76289	0.12335	0.473389	no	215.276	23033
XLOC_000424	XLOC_000424	Phlda3	chr1:135764414-135769134	chr1	135764414	135769134	d8 Nkx2-5 EmGFP	CLK	OK	37.1746	54.8792	0.561943	0.444754	0.66775	0.905198	no	17.7046	4720
XLOC_000425	XLOC_000425	Tnni1	chr1:135788151-135810989	chr1	135788151	135810989	d8 Nkx2-5 EmGFP	CLK	OK	400.895	0.169551	-11.2073	-6.49608	0.01925	0.222363	no	400.725	22838
XLOC_000426	XLOC_000426	Lad1	chr1:135818597-135833341	chr1	135818597	135833341	d8 Nkx2-5 EmGFP	CLK	OK	2.22787	15.5656	2.80462	1.7192	0.10085	0.422033	no	13.3377	14744
XLOC_000427	XLOC_000427	Tnnt2	chr1:135836385-135852261	chr1	135836385	135852261	d8 Nkx2-5 EmGFP	CLK	OK	104.656	0.0936984	-10.1253	-5.62817	0.0023	0.0709338	no	104.562	15876
XLOC_000428	XLOC_000428	Tmem9	chr1:136008218-136035030	chr1	136008218	136035030	d8 Nkx2-5 EmGFP	CLK	OK	120.889	26.0167	-2.21617	-1.77104	0.10085	0.422033	no	94.8723	26812
XLOC_000429	XLOC_000429	Cacna1s	chr1:136052900-136119822	chr1	136052900	136119822	d8 Nkx2-5 EmGFP	CLK	OK	0.0692399	0.166991	1.27009	0.620845	0.57365	0.864496	no	0.0977511	66922
XLOC_000430	XLOC_000430	Kif21b	chr1:136131376-136178014	chr1	136131376	136178014	d8 Nkx2-5 EmGFP	CLK	OK	22.8107	3.74305	-2.60742	-2.10271	0.0532	0.28546	no	19.0677	46638
XLOC_000431	XLOC_000431	Ddx59	chr1:136411915-136440220	chr1	136411915	136440220	d8 Nkx2-5 EmGFP	CLK	OK	4.11478	6.10009	0.568015	0.357233	0.7316	0.930721	no	1.98531	28305
XLOC_000432	XLOC_000432	Kif14	chr1:136466397-136531511	chr1	136466397	136531511	d8 Nkx2-5 EmGFP	CLK	OK	3.14791	6.32948	1.00769	0.763168	0.45865	0.800453	no	3.18157	65114
XLOC_000433	XLOC_000433	Zfp281	chr1:136598312-136633271	chr1	136598312	136633271	d8 Nkx2-5 EmGFP	CLK	OK	6.31902	17.2873	1.45194	1.10276	0.29005	0.688833	no	10.9683	34959
XLOC_000434	XLOC_000434	Gm19705	chr1:136674685-136690870	chr1	136674685	136690870	d8 Nkx2-5 EmGFP	CLK	OK	0.167113	2.43845	3.86707	1.33768	0.16545	0.554852	no	2.27134	16185
XLOC_000435	XLOC_000435	Gm16880	chr1:136696107-136729735	chr1	136696107	136729735	d8 Nkx2-5 EmGFP	CLK	OK	0.0875456	2.11842	4.59681	1.74204	0.1053	0.433357	no	2.03087	33628
XLOC_000436	XLOC_000436	Mir181a-1	chr1:137966454-137966541	chr1	137966454	137966541	d8 Nkx2-5 EmGFP	CLK	NOTEST	0	0	0	0	1	1	no	0	87
XLOC_000437	XLOC_000437	Mir181b-1	chr1:137966638-137966718	chr1	137966638	137966718	d8 Nkx2-5 EmGFP	CLK	NOTEST	0	0	0	0	1	1	no	0	80
XLOC_000438	XLOC_000438	Atp6v1g3	chr1:138273737-138289462	chr1	138273737	138289462	d8 Nkx2-5 EmGFP	CLK	NOTEST	0	0	0	0	1	1	no	0	15725
XLOC_000439	XLOC_000439	Dennd1b	chr1:138963708-139176046	chr1	138963708	139176046	d8 Nkx2-5 EmGFP	CLK	OK	1.36966	1.81462	0.405857	0.252799	0.81325	0.953473	no	0.44496	212338
XLOC_000440	XLOC_000440	4933436E23Rik	chr1:139379451-139402852	chr1	139379451	139402852	d8 Nkx2-5 EmGFP	CLK	NOTEST	0	0	0	0	1	1	no	0	23401
XLOC_000441	XLOC_000441	Zbtb41	chr1:139422245-139453007	chr1	139422245	139453007	d8 Nkx2-5 EmGFP	CLK	OK	1.77491	1.61277	-0.138208	-0.0848079	0.9338	0.983483	no	0.16214	30762
XLOC_000442	XLOC_000442	Aspm	chr1:139454772-139494088	chr1	139454772	139494088	d8 Nkx2-5 EmGFP	CLK	OK	3.60653	8.38196	1.21668	1.00928	0.36215	0.742633	no	4.77543	39316
XLOC_000443	XLOC_000443	F13b	chr1:139501706-139523756	chr1	139501706	139523756	d8 Nkx2-5 EmGFP	CLK	NOTEST	0	0.00916304	inf	0	1	1	no	0.00916304	22050
XLOC_000444	XLOC_000444	Kcnt2	chr1:140245734-140656402	chr1	140245734	140656402	d8 Nkx2-5 EmGFP	CLK	OK	0.450352	0.361419	-0.31738	-0.155746	0.8826	0.971387	no	0.088933	410668
XLOC_000445	XLOC_000445	B3galt2	chr1:143598813-143702901	chr1	143598813	143702901	d8 Nkx2-5 EmGFP	CLK	NOTEST	0.0115648	0.010987	-0.073941	0	1	1	no	0.0005778	104088
XLOC_000446	XLOC_000446	Glrx2	chr1:143739348-143749678	chr1	143739348	143749678	d8 Nkx2-5 EmGFP	CLK	OK	2.70775	6.047	1.15913	0.729139	0.4828	0.815603	no	3.33925	10330
XLOC_000447	XLOC_000447	Uchl5	chr1:143777121-143807466	chr1	143777121	143807466	d8 Nkx2-5 EmGFP	CLK	OK	14.3124	47.0878	1.71809	1.27639	0.2231	0.633861	no	32.7754	30345
XLOC_000448	XLOC_000448	Fam5c	chr1:146495665-146902472	chr1	146495665	146902472	d8 Nkx2-5 EmGFP	CLK	OK	0.257175	0.0212475	-3.59739	-1.65095	0.17425	0.567844	no	0.235927	406807
XLOC_000449	XLOC_000449	Ptgs2	chr1:150076660-150108012	chr1	150076660	150108012	d8 Nkx2-5 EmGFP	CLK	OK	0.61324	0.299551	-1.03365	-0.515573	0.64085	0.894243	no	0.313689	31352
XLOC_000450	XLOC_000450	Pdc	chr1:150319416-150346771	chr1	150319416	150346771	d8 Nkx2-5 EmGFP	CLK	NOTEST	0.00792842	0	#NAME?	0	1	1	no	0.00792842	27355
XLOC_000451	XLOC_000451	Tpr	chr1:150361310-150466165	chr1	150361310	150466165	d8 Nkx2-5 EmGFP	CLK	OK	21.5852	24.0516	0.156092	0.124274	0.89455	0.97381	no	2.4664	104855
XLOC_000452	XLOC_000452	C730036E19Rik	chr1:151138033-151144095	chr1	151138033	151144095	d8 Nkx2-5 EmGFP	CLK	NOTEST	0	0	0	0	1	1	no	0	6062
XLOC_000453	XLOC_000453	Ivns1abp	chr1:151343471-151364445	chr1	151343471	151364445	d8 Nkx2-5 EmGFP	CLK	OK	57.5102	45.522	-0.337255	-0.290648	0.77835	0.945311	no	11.9882	20974
XLOC_000454	XLOC_000454	1190005F20Rik	chr1:151428647-151458183	chr1	151428647	151458183	d8 Nkx2-5 EmGFP	CLK	OK	4.17122	20.2396	2.27864	1.64618	0.14995	0.525575	no	16.0684	29536
XLOC_000455	XLOC_000455	Fam129a	chr1:151571101-151721934	chr1	151571101	151721934	d8 Nkx2-5 EmGFP	CLK	OK	1.57851	3.84741	1.28533	0.823921	0.433	0.784183	no	2.2689	150833
XLOC_000456	XLOC_000456	Edem3	chr1:151748949-151822328	chr1	151748949	151822328	d8 Nkx2-5 EmGFP	CLK	OK	5.40999	5.24008	-0.0460378	-0.0339652	0.9726	0.991338	no	0.16991	73379
XLOC_000457	XLOC_000457	Glt25d2	chr1:152399866-152510695	chr1	152399866	152510695	d8 Nkx2-5 EmGFP	CLK	OK	0.364639	0.0305679	-3.57638	-1.79537	0.18735	0.587423	no	0.334071	110829
XLOC_000458	XLOC_000458	Apobec4	chr1:152516789-152766290	chr1	152516789	152766290	d8 Nkx2-5 EmGFP	CLK	NOTEST	0	0	0	0	1	1	no	0	249501
XLOC_000459	XLOC_000459	Arpc5	chr1:152766541-152775580	chr1	152766541	152775580	d8 Nkx2-5 EmGFP	CLK	OK	42.0845	54.6053	0.375752	0.375758	0.7646	0.941534	no	12.5208	9039
XLOC_000460	XLOC_000460	Ncf2	chr1:152793989-152836990	chr1	152793989	152836990	d8 Nkx2-5 EmGFP	CLK	OK	0.245411	0.623104	1.34427	0.665639	0.55185	0.853788	no	0.377693	43001
XLOC_000461	XLOC_000461	Nmnat2	chr1:152954772-153119444	chr1	152954772	153119444	d8 Nkx2-5 EmGFP	CLK	OK	0.242597	3.37601	3.79869	1.88853	0.0936	0.404134	no	3.13341	164672
XLOC_000462	XLOC_000462	-	chr1:153378763-153387200	chr1	153378763	153387200	d8 Nkx2-5 EmGFP	CLK	OK	0	0.78277	inf	#NAME?	0.0051	0.117221	no	0.78277	8437
XLOC_000463	XLOC_000463	1700012A16Rik	chr1:153425208-153455314	chr1	153425208	153455314	d8 Nkx2-5 EmGFP	CLK	OK	0.0782874	0.11023	0.493667	0.220201	0.8366	0.959603	no	0.0319426	30106
XLOC_000464	XLOC_000464	-	chr1:153586055-153587838	chr1	153586055	153587838	d8 Nkx2-5 EmGFP	CLK	NOTEST	0	0	0	0	1	1	no	0	1783
XLOC_000465	XLOC_000465	Rgs8	chr1:153653036-153697665	chr1	153653036	153697665	d8 Nkx2-5 EmGFP	CLK	OK	0.0405751	0.0967794	1.2541	0.630002	0.6118	0.881961	no	0.0562043	44629
XLOC_000466	XLOC_000466	Rgs16	chr1:153740352-153745468	chr1	153740352	153745468	d8 Nkx2-5 EmGFP	CLK	OK	1.43974	2.25835	0.649458	0.35912	0.7552	0.938301	no	0.81861	5116
XLOC_000467	XLOC_000467	Rnasel	chr1:153749425-153764221	chr1	153749425	153764221	d8 Nkx2-5 EmGFP	CLK	OK	0.6531	0.0268825	-4.60256	-2.19649	0.0772	0.358303	no	0.626217	14796
XLOC_000468	XLOC_000468	Gm5531	chr1:153874344-153876871	chr1	153874344	153876871	d8 Nkx2-5 EmGFP	CLK	OK	0	0.495253	inf	#NAME?	0.0024	0.0726144	no	0.495253	2527
XLOC_000469	XLOC_000469	Teddm1	chr1:153891645-153893060	chr1	153891645	153893060	d8 Nkx2-5 EmGFP	CLK	NOTEST	0	0.0365773	inf	0	1	1	no	0.0365773	1415
XLOC_000470	XLOC_000470	Glul	chr1:153899944-153909714	chr1	153899944	153909714	d8 Nkx2-5 EmGFP	CLK	OK	55.4625	147.327	1.40944	1.20669	0.23735	0.646246	no	91.8645	9770
XLOC_000471	XLOC_000471	Zfp648	chr1:154201186-154205674	chr1	154201186	154205674	d8 Nkx2-5 EmGFP	CLK	NOTEST	0	0.017389	inf	0	1	1	no	0.017389	4488
XLOC_000472	XLOC_000472	Stx6	chr1:155158702-155203517	chr1	155158702	155203517	d8 Nkx2-5 EmGFP	CLK	OK	15.2885	14.12	-0.114705	-0.0857786	0.9317	0.983082	no	1.1685	44815
XLOC_000473	XLOC_000473	Acbd6	chr1:155558119-155687233	chr1	155558119	155687233	d8 Nkx2-5 EmGFP	CLK	OK	46.9863	69.1159	0.556777	0.437312	0.66785	0.905232	no	22.1296	129114
XLOC_000474	XLOC_000474	Tor1aip2	chr1:156004598-156068859	chr1	156004598	156068859	d8 Nkx2-5 EmGFP	CLK	OK	45.7581	54.2121	0.244586	0.176384	0.86205	0.965777	no	8.454	64261
XLOC_000475	XLOC_000475	Nphs2	chr1:156310734-156328035	chr1	156310734	156328035	d8 Nkx2-5 EmGFP	CLK	NOTEST	0.0750535	0.0522809	-0.521636	0	1	1	no	0.0227726	17301
XLOC_000476	XLOC_000476	Abl2	chr1:156558740-156674339	chr1	156558740	156674339	d8 Nkx2-5 EmGFP	CLK	OK	6.66906	17.4573	1.38828	1.15589	0.29195	0.690587	no	10.7882	115599
XLOC_000477	XLOC_000477	Angptl1	chr1:156804165-156939626	chr1	156804165	156939626	d8 Nkx2-5 EmGFP	CLK	OK	0.118101	0.0122901	-3.26446	-0.094231	0.14525	0.516476	no	0.105811	135461
XLOC_000478	XLOC_000478	2810025M15Rik	chr1:157135033-157420236	chr1	157135033	157420236	d8 Nkx2-5 EmGFP	CLK	OK	37.1893	89.2988	1.26375	0.906669	0.3892	0.757669	no	52.1095	285203
XLOC_000479	XLOC_000479	BC026585	chr1:157458399-157489937	chr1	157458399	157489937	d8 Nkx2-5 EmGFP	CLK	OK	11.842	3.54192	-1.7413	-1.01211	0.32395	0.715871	no	8.30008	31538
XLOC_000480	XLOC_000480	Sec16b	chr1:157506791-157568424	chr1	157506791	157568424	d8 Nkx2-5 EmGFP	CLK	NOTEST	0.0400927	0.041264	0.0415454	0	1	1	no	0.0011713	61633
XLOC_000481	XLOC_000481	Astn1	chr1:158362105-158691786	chr1	158362105	158691786	d8 Nkx2-5 EmGFP	CLK	OK	0.100119	0.573278	2.51751	1.17254	0.27565	0.676207	no	0.473159	329681
XLOC_000482	XLOC_000482	Mir488	chr1:158362105-158691786	chr1	158362105	158691786	d8 Nkx2-5 EmGFP	CLK	NOTEST	0	0	0	0	1	1	no	0	329681
XLOC_000483	XLOC_000483	Rfwd2	chr1:159232160-159347580	chr1	159232160	159347580	d8 Nkx2-5 EmGFP	CLK	OK	3.04384	13.9936	2.20081	1.49159	0.18645	0.586239	no	10.9498	115420
XLOC_000484	XLOC_000484	Scarna3a	chr1:159232160-159347580	chr1	159232160	159347580	d8 Nkx2-5 EmGFP	CLK	NOTEST	0	0	0	0	1	1	no	0	115420
XLOC_000485	XLOC_000485	Tnr	chr1:159523768-159924922	chr1	159523768	159924922	d8 Nkx2-5 EmGFP	CLK	NOTEST	0.0592716	0.0139416	-2.08794	0	1	1	no	0.04533	401154
XLOC_000486	XLOC_000486	4930523C07Rik	chr1:160044379-160078586	chr1	160044379	160078586	d8 Nkx2-5 EmGFP	CLK	OK	0.225637	0.0233198	-3.27437	-1.49707	0.2253	0.635289	no	0.202317	34207
XLOC_000487	XLOC_000487	Mrps14	chr1:160195259-160201186	chr1	160195259	160201186	d8 Nkx2-5 EmGFP	CLK	OK	14.9459	33.5282	1.16562	1.30761	0.41935	0.776753	no	18.5823	5927
XLOC_000488	XLOC_000488	Rc3h1	chr1:160906408-160974976	chr1	160906408	160974976	d8 Nkx2-5 EmGFP	CLK	OK	4.9641	4.07405	-0.285067	-0.218088	0.8293	0.957725	no	0.89005	68568
XLOC_000489	XLOC_000489	Serpinc1	chr1:160978605-161038537	chr1	160978605	161038537	d8 Nkx2-5 EmGFP	CLK	NOTEST	0.0359405	0.0220663	-0.703766	0	1	1	no	0.0138742	59932
XLOC_000490	XLOC_000490	Gas5,Mir5117	chr1:160978605-161038537	chr1	160978605	161038537	d8 Nkx2-5 EmGFP	CLK	OK	91.3573	21.0985	-2.11438	-1.03854	0.30435	0.701233	no	70.2588	59932
XLOC_000491	XLOC_000491	Snord47	chr1:160978605-161038537	chr1	160978605	161038537	d8 Nkx2-5 EmGFP	CLK	NOTEST	0	0	0	0	1	1	no	0	59932
XLOC_000492	XLOC_000492	Cenpl	chr1:161040612-161086343	chr1	161040612	161086343	d8 Nkx2-5 EmGFP	CLK	OK	5.73632	7.3744	0.362401	0.127253	0.913	0.978117	no	1.63808	45731
XLOC_000493	XLOC_000493	Ankrd45	chr1:161142711-161170691	chr1	161142711	161170691	d8 Nkx2-5 EmGFP	CLK	OK	0.906552	2.3302	1.36199	0.80648	0.49855	0.825737	no	1.42365	27980
XLOC_000494	XLOC_000494	Tnfsf4	chr1:161395437-161418206	chr1	161395437	161418206	d8 Nkx2-5 EmGFP	CLK	NOTEST	0.0242203	0.014411	-0.749053	0	1	1	no	0.0098093	22769
XLOC_000495	XLOC_000495	Tnfsf18	chr1:161494656-161505290	chr1	161494656	161505290	d8 Nkx2-5 EmGFP	CLK	NOTEST	0	0	0	0	1	1	no	0	10634
XLOC_000496	XLOC_000496	Pigc	chr1:161942088-161979636	chr1	161942088	161979636	d8 Nkx2-5 EmGFP	CLK	OK	4.91861	1.1579	-2.08674	-1.19065	0.2737	0.674988	no	3.76071	37548
XLOC_000497	XLOC_000497	2810442N19Rik	chr1:161982546-162478034	chr1	161982546	162478034	d8 Nkx2-5 EmGFP	CLK	NOTEST	0.0413027	0	#NAME?	0	1	1	no	0.0413027	495488
XLOC_000498	XLOC_000498	Dnm3os	chr1:161982546-162478034	chr1	161982546	162478034	d8 Nkx2-5 EmGFP	CLK	OK	0.122397	0	#NAME?	#NAME?	0.16245	0.549594	no	0.122397	495488
XLOC_000499	XLOC_000499	Vamp4	chr1:162570457-162601216	chr1	162570457	162601216	d8 Nkx2-5 EmGFP	CLK	OK	5.58227	1.93436	-1.52899	-0.843531	0.40065	0.7657	no	3.64791	30759
XLOC_000500	XLOC_000500	Myoc	chr1:162639149-162658219	chr1	162639149	162658219	d8 Nkx2-5 EmGFP	CLK	NOTEST	0	0.0028239	inf	0	1	1	no	0.0028239	19070
XLOC_000501	XLOC_000501	Kifap3	chr1:163779596-163917100	chr1	163779596	163917100	d8 Nkx2-5 EmGFP	CLK	OK	15.7923	21.1574	0.421941	0.337852	0.7456	0.935232	no	5.3651	137504
XLOC_000502	XLOC_000502	Scyl3	chr1:163930063-163997244	chr1	163930063	163997244	d8 Nkx2-5 EmGFP	CLK	OK	2.86013	4.67516	0.708936	0.2804	0.82685	0.957388	no	1.81503	67181
XLOC_000503	XLOC_000503	2810422O20Rik	chr1:163930063-163997244	chr1	163930063	163997244	d8 Nkx2-5 EmGFP	CLK	OK	1.41182	5.37771	1.92943	0.330937	0.73695	0.932091	no	3.96589	67181
XLOC_000504	XLOC_000504	Sele	chr1:164048220-164058477	chr1	164048220	164058477	d8 Nkx2-5 EmGFP	CLK	NOTEST	0.0142402	0	#NAME?	0	1	1	no	0.0142402	10257
XLOC_000505	XLOC_000505	Sell	chr1:164062075-164080785	chr1	164062075	164080785	d8 Nkx2-5 EmGFP	CLK	NOTEST	0.0124155	0.00652908	-0.927193	0	1	1	no	0.00588642	18710
XLOC_000506	XLOC_000506	Selp	chr1:164115263-164220600	chr1	164115263	164220600	d8 Nkx2-5 EmGFP	CLK	NOTEST	0.0189659	0.0112186	-0.757524	0	1	1	no	0.0077473	105337
XLOC_000507	XLOC_000507	F5	chr1:164115263-164220600	chr1	164115263	164220600	d8 Nkx2-5 EmGFP	CLK	OK	0.228974	0.875601	1.93509	1.01511	0.3541	0.736919	no	0.646627	105337
XLOC_000508	XLOC_000508	Slc19a2	chr1:164249029-164265370	chr1	164249029	164265370	d8 Nkx2-5 EmGFP	CLK	OK	7.02587	19.0915	1.44218	1.06564	0.3155	0.710406	no	12.0656	16341
XLOC_000509	XLOC_000509	4930455F23Rik	chr1:164275575-164287974	chr1	164275575	164287974	d8 Nkx2-5 EmGFP	CLK	OK	2.19474	1.38836	-0.660673	-0.348054	0.7431	0.934106	no	0.80638	12399
XLOC_000510	XLOC_000510	Nme7	chr1:164307487-164464481	chr1	164307487	164464481	d8 Nkx2-5 EmGFP	CLK	OK	11.6989	18.3054	0.645896	0.347618	0.78335	0.94587	no	6.6065	156994
XLOC_000511	XLOC_000511	Atp1b1	chr1:164307487-164464481	chr1	164307487	164464481	d8 Nkx2-5 EmGFP	CLK	OK	0.225228	0.185275	-0.281717	-0.0222571	0.2757	0.676207	no	0.039953	156994
XLOC_000512	XLOC_000512	-	chr1:164502420-164569165	chr1	164502420	164569165	d8 Nkx2-5 EmGFP	CLK	OK	0	0.281794	inf	#NAME?	0.0364	0.255134	no	0.281794	66745
XLOC_000513	XLOC_000513	Dpt	chr1:164796731-164824266	chr1	164796731	164824266	d8 Nkx2-5 EmGFP	CLK	OK	0.147356	0	#NAME?	#NAME?	0.01965	0.224376	no	0.147356	27535
XLOC_000514	XLOC_000514	LOC433374	chr1:164863120-164871438	chr1	164863120	164871438	d8 Nkx2-5 EmGFP	CLK	NOTEST	0	0	0	0	1	1	no	0	8318
XLOC_000515	XLOC_000515	Gpr161	chr1:165281858-165326849	chr1	165281858	165326849	d8 Nkx2-5 EmGFP	CLK	OK	2.42128	1.3816	-0.809436	-0.428497	0.6408	0.894243	no	1.03968	44991
XLOC_000516	XLOC_000516	Brp44	chr1:165461207-165481214	chr1	165461207	165481214	d8 Nkx2-5 EmGFP	CLK	OK	11.4324	7.99975	-0.515106	-0.388436	0.78605	0.946679	no	3.43265	20007
XLOC_000517	XLOC_000517	Adcy10	chr1:165485182-165576773	chr1	165485182	165576773	d8 Nkx2-5 EmGFP	CLK	NOTEST	0	0.034738	inf	0	1	1	no	0.034738	91591
XLOC_000518	XLOC_000518	Creg1	chr1:165763779-165775304	chr1	165763779	165775304	d8 Nkx2-5 EmGFP	CLK	OK	10.2629	2.7998	-1.87405	-1.26539	0.29545	0.693589	no	7.4631	11525
XLOC_000519	XLOC_000519	Cd247	chr1:165788680-166002664	chr1	165788680	166002664	d8 Nkx2-5 EmGFP	CLK	NOTEST	0.061291	0.0384633	-0.672195	0	1	1	no	0.0228277	213984
XLOC_000520	XLOC_000520	Gpa33	chr1:166130459-166166510	chr1	166130459	166166510	d8 Nkx2-5 EmGFP	CLK	OK	0.362659	31.0916	6.42177	3.94448	0.0164	0.208363	no	30.7289	36051
XLOC_000521	XLOC_000521	Ildr2	chr1:166254138-166316832	chr1	166254138	166316832	d8 Nkx2-5 EmGFP	CLK	OK	0.227406	1.02491	2.17215	0.687449	0.36735	0.745084	no	0.797504	62694
XLOC_000522	XLOC_000522	Tada1	chr1:166378994-166409829	chr1	166378994	166409829	d8 Nkx2-5 EmGFP	CLK	OK	6.94783	5.13784	-0.435401	-0.23086	0.85245	0.963709	no	1.80999	30835
XLOC_000523	XLOC_000523	Fam78b	chr1:167001416-167091302	chr1	167001416	167091302	d8 Nkx2-5 EmGFP	CLK	OK	0.551745	0.252295	-1.12889	-0.555389	0.6115	0.881864	no	0.29945	89886
XLOC_000524	XLOC_000524	Tmco1	chr1:167308669-167333978	chr1	167308669	167333978	d8 Nkx2-5 EmGFP	CLK	OK	8.84464	10.9355	0.306147	0.263322	0.8181	0.955077	no	2.09086	25309
XLOC_000525	XLOC_000525	Aldh9a1	chr1:167349990-167368530	chr1	167349990	167368530	d8 Nkx2-5 EmGFP	CLK	OK	27.9819	37.2719	0.413596	0.378214	0.7425	0.933913	no	9.29	18540
XLOC_000526	XLOC_000526	Rxrg	chr1:167598361-167639623	chr1	167598361	167639623	d8 Nkx2-5 EmGFP	CLK	OK	0.484079	2.18385	2.17356	1.12027	0.3086	0.704493	no	1.69977	41262
XLOC_000527	XLOC_000527	Lmx1a	chr1:167689260-167848733	chr1	167689260	167848733	d8 Nkx2-5 EmGFP	CLK	OK	0.0789703	0.100067	0.341582	0.161136	0.8842	0.971684	no	0.0210967	159473
XLOC_000528	XLOC_000528	Rgs5	chr1:169655341-169695748	chr1	169655341	169695748	d8 Nkx2-5 EmGFP	CLK	OK	30.4231	0.0235765	-10.3336	-5.196	0.12895	0.483766	no	30.3995	40407
XLOC_000529	XLOC_000529	1700084C01Rik	chr1:169928938-169934653	chr1	169928938	169934653	d8 Nkx2-5 EmGFP	CLK	OK	0.147584	0.244549	0.728584	0.347804	0.76955	0.942781	no	0.096965	5715
XLOC_000530	XLOC_000530	3110045C21Rik	chr1:169969408-170111305	chr1	169969408	170111305	d8 Nkx2-5 EmGFP	CLK	NOTEST	0.0799473	0.0209008	-1.93549	0	1	1	no	0.0590465	141897
XLOC_000531	XLOC_000531	Sh2d1b2	chr1:170232870-170251587	chr1	170232870	170251587	d8 Nkx2-5 EmGFP	CLK	NOTEST	0	0	0	0	1	1	no	0	18717
XLOC_000532	XLOC_000532	Sh2d1b1	chr1:170277186-170285662	chr1	170277186	170285662	d8 Nkx2-5 EmGFP	CLK	NOTEST	0.00700639	0.016675	1.25094	0	1	1	no	0.00966861	8476
XLOC_000533	XLOC_000533	1700015E13Rik	chr1:170298192-170589849	chr1	170298192	170589849	d8 Nkx2-5 EmGFP	CLK	NOTEST	0.0710114	0.0450406	-0.656826	0	1	1	no	0.0259708	291657
XLOC_000534	XLOC_000534	Olfml2b	chr1:170644531-170682789	chr1	170644531	170682789	d8 Nkx2-5 EmGFP	CLK	OK	8.03055	0.425701	-4.23759	-2.47354	0.0551	0.286132	no	7.60485	38258
XLOC_000535	XLOC_000535	Fcgr4	chr1:171018925-171029761	chr1	171018925	171029761	d8 Nkx2-5 EmGFP	CLK	NOTEST	0.0401024	0.0191069	-1.06959	0	1	1	no	0.0209955	10836
XLOC_000536	XLOC_000536	1700009P17Rik	chr1:171113913-171126967	chr1	171113913	171126967	d8 Nkx2-5 EmGFP	CLK	OK	1.03806	1.0256	-0.017422	-0.00849447	0.99395	0.997718	no	0.01246	13054
XLOC_000537	XLOC_000537	Mpz	chr1:171150712-171161123	chr1	171150712	171161123	d8 Nkx2-5 EmGFP	CLK	OK	0.169189	0.130319	-0.376593	-0.199913	0.88175	0.971104	no	0.03887	10411
XLOC_000538	XLOC_000538	Nr1i3	chr1:171213969-171222644	chr1	171213969	171222644	d8 Nkx2-5 EmGFP	CLK	NOTEST	0	0.00593858	inf	0	1	1	no	0.00593858	8675
XLOC_000539	XLOC_000539	Apoa2	chr1:171225053-171226469	chr1	171225053	171226469	d8 Nkx2-5 EmGFP	CLK	OK	4.98842	0.447819	-3.4776	-1.69103	0.16725	0.557279	no	4.5406	1416
XLOC_000540	XLOC_000540	Adamts4	chr1:171250203-171262215	chr1	171250203	171262215	d8 Nkx2-5 EmGFP	CLK	OK	2.0648	0.754906	-1.45163	-0.793946	0.45235	0.795914	no	1.30989	12012
XLOC_000541	XLOC_000541	B4galt3	chr1:171270327-171281208	chr1	171270327	171281208	d8 Nkx2-5 EmGFP	CLK	OK	18.6318	19.2539	0.0473846	0.0336725	0.9753	0.991857	no	0.6221	10881
XLOC_000542	XLOC_000542	Dedd	chr1:171329144-171345654	chr1	171329144	171345654	d8 Nkx2-5 EmGFP	CLK	OK	17.2323	17.709	0.0393671	0.0277403	0.97955	0.992918	no	0.4767	16510
XLOC_000543	XLOC_000543	Pfdn2	chr1:171345698-171358170	chr1	171345698	171358170	d8 Nkx2-5 EmGFP	CLK	OK	90.8874	120.122	0.402353	0.32038	0.75655	0.938978	no	29.2346	12472
XLOC_000544	XLOC_000544	Pvrl4	chr1:171370172-171388287	chr1	171370172	171388287	d8 Nkx2-5 EmGFP	CLK	OK	0.0894827	0.588017	2.71618	1.3255	0.25835	0.661956	no	0.498534	18115
XLOC_000545	XLOC_000545	Arhgap30	chr1:171388959-171410239	chr1	171388959	171410239	d8 Nkx2-5 EmGFP	CLK	OK	0.171561	1.39865	3.02725	1.48653	0.1683	0.558969	no	1.22709	21280
XLOC_000546	XLOC_000546	Tstd1,Usf1	chr1:171411150-171420352	chr1	171411150	171420352	d8 Nkx2-5 EmGFP	CLK	OK	23.5386	38.897	0.724632	0.55696	0.5736	0.864496	no	15.3584	9202
XLOC_000547	XLOC_000547	F11r	chr1:171437374-171465141	chr1	171437374	171465141	d8 Nkx2-5 EmGFP	CLK	OK	29.1921	30.2043	0.049175	0.0392607	0.96935	0.990472	no	1.0122	27767
XLOC_000548	XLOC_000548	Alyref2	chr1:171503477-171504750	chr1	171503477	171504750	d8 Nkx2-5 EmGFP	CLK	OK	1.23131	0.831325	-0.566708	-0.32797	0.80175	0.950527	no	0.399985	1273
XLOC_000549	XLOC_000549	Cd244	chr1:171559192-171585316	chr1	171559192	171585316	d8 Nkx2-5 EmGFP	CLK	NOTEST	0	0	0	0	1	1	no	0	26124
XLOC_000550	XLOC_000550	Cd48	chr1:171682054-171705257	chr1	171682054	171705257	d8 Nkx2-5 EmGFP	CLK	NOTEST	0	0	0	0	1	1	no	0	23203
XLOC_000551	XLOC_000551	-	chr1:171711069-171711511	chr1	171711069	171711511	d8 Nkx2-5 EmGFP	CLK	OK	98.4059	0	#NAME?	#NAME?	5e-05	0.00396813	yes	98.4059	442
XLOC_000552	XLOC_000552	Slamf1	chr1:171767131-171801184	chr1	171767131	171801184	d8 Nkx2-5 EmGFP	CLK	NOTEST	0.0128683	0	#NAME?	0	1	1	no	0.0128683	34053
XLOC_000553	XLOC_000553	Cd84	chr1:171839696-171890718	chr1	171839696	171890718	d8 Nkx2-5 EmGFP	CLK	NOTEST	0.0348404	0.0747239	1.10081	0	1	1	no	0.0398835	51022
XLOC_000554	XLOC_000554	Slamf6	chr1:171917536-171943868	chr1	171917536	171943868	d8 Nkx2-5 EmGFP	CLK	NOTEST	0	0.012101	inf	0	1	1	no	0.012101	26332
XLOC_000555	XLOC_000555	Copa	chr1:172066012-172122333	chr1	172066012	172122333	d8 Nkx2-5 EmGFP	CLK	OK	89.7851	81.2625	-0.143885	-0.114191	0.91115	0.97778	no	8.5226	56321
XLOC_000556	XLOC_000556	Pex19	chr1:172126754-172136497	chr1	172126754	172136497	d8 Nkx2-5 EmGFP	CLK	OK	56.2929	27.8472	-1.01542	-0.850205	0.40725	0.769605	no	28.4457	9743
XLOC_000557	XLOC_000557	Dcaf8	chr1:172148014-172206814	chr1	172148014	172206814	d8 Nkx2-5 EmGFP	CLK	OK	27.9295	19.8134	-0.495315	-0.317877	0.75695	0.939109	no	8.1161	58800
XLOC_000558	XLOC_000558	Igsf8	chr1:172312406-172319835	chr1	172312406	172319835	d8 Nkx2-5 EmGFP	CLK	OK	22.1741	20.4168	-0.119119	-0.0968472	0.92915	0.982428	no	1.7573	7429
XLOC_000559	XLOC_000559	Kcnj10	chr1:172341209-172374085	chr1	172341209	172374085	d8 Nkx2-5 EmGFP	CLK	OK	0.054984	0.691758	3.65318	1.91863	0.14955	0.524962	no	0.636774	32876
XLOC_000560	XLOC_000560	Pigm	chr1:172376530-172384099	chr1	172376530	172384099	d8 Nkx2-5 EmGFP	CLK	OK	4.78524	3.53407	-0.43726	-0.425536	0.75925	0.939775	no	1.25117	7569
XLOC_000561	XLOC_000561	Slamf9	chr1:172455906-172478409	chr1	172455906	172478409	d8 Nkx2-5 EmGFP	CLK	OK	0.0839367	1.05685	3.65433	1.70103	0.1441	0.513893	no	0.972913	22503
XLOC_000562	XLOC_000562	Igsf9	chr1:172481750-172498877	chr1	172481750	172498877	d8 Nkx2-5 EmGFP	CLK	OK	4.78539	17.2867	1.85296	1.3778	0.1897	0.590668	no	12.5013	17127
XLOC_000563	XLOC_000563	Tagln2	chr1:172500245-172507375	chr1	172500245	172507375	d8 Nkx2-5 EmGFP	CLK	OK	293.432	182.672	-0.683773	-0.691028	0.55845	0.856902	no	110.76	7130
XLOC_000564	XLOC_000564	-	chr1:172513107-172518952	chr1	172513107	172518952	d8 Nkx2-5 EmGFP	CLK	NOTEST	0.0111496	0.0100882	-0.144324	0	1	1	no	0.0010614	5845
XLOC_000565	XLOC_000565	Ccdc19	chr1:172521107-172550806	chr1	172521107	172550806	d8 Nkx2-5 EmGFP	CLK	OK	0.478631	0.314844	-0.604276	-0.249807	0.79945	0.949986	no	0.163787	29699
XLOC_000566	XLOC_000566	Vsig8	chr1:172555937-172563717	chr1	172555937	172563717	d8 Nkx2-5 EmGFP	CLK	NOTEST	0.0596399	0.0342086	-0.801918	0	1	1	no	0.0254313	7780
XLOC_000567	XLOC_000567	Crp	chr1:172698055-172699966	chr1	172698055	172699966	d8 Nkx2-5 EmGFP	CLK	NOTEST	0	0	0	0	1	1	no	0	1911
XLOC_000568	XLOC_000568	Olfr16	chr1:172956767-172957817	chr1	172956767	172957817	d8 Nkx2-5 EmGFP	CLK	NOTEST	0	0	0	0	1	1	no	0	1050
XLOC_000569	XLOC_000569	Olfr218	chr1:173203357-173204299	chr1	173203357	173204299	d8 Nkx2-5 EmGFP	CLK	NOTEST	0	0	0	0	1	1	no	0	942
XLOC_000570	XLOC_000570	Olfr1404	chr1:173215606-173216640	chr1	173215606	173216640	d8 Nkx2-5 EmGFP	CLK	NOTEST	0	0	0	0	1	1	no	0	1034
XLOC_000571	XLOC_000571	Olfr418-ps1	chr1:173270146-173271137	chr1	173270146	173271137	d8 Nkx2-5 EmGFP	CLK	NOTEST	0	0	0	0	1	1	no	0	991
XLOC_000572	XLOC_000572	Aim2	chr1:173420439-173466304	chr1	173420439	173466304	d8 Nkx2-5 EmGFP	CLK	OK	0.221638	2.73509	3.62531	1.89619	0.1049	0.432327	no	2.51345	45865
XLOC_000573	XLOC_000573	Pyhin1	chr1:173630858-173647928	chr1	173630858	173647928	d8 Nkx2-5 EmGFP	CLK	NOTEST	0.00511148	0.00992572	0.957429	0	1	1	no	0.00481424	17070
XLOC_000574	XLOC_000574	Pydc3	chr1:173673679-173698392	chr1	173673679	173698392	d8 Nkx2-5 EmGFP	CLK	NOTEST	0	0.00218746	inf	0	1	1	no	0.00218746	24713
XLOC_000575	XLOC_000575	Olfr433	chr1:174041932-174042936	chr1	174041932	174042936	d8 Nkx2-5 EmGFP	CLK	NOTEST	0.0466054	0	#NAME?	0	1	1	no	0.0466054	1004
XLOC_000576	XLOC_000576	Olfr432	chr1:174050374-174051313	chr1	174050374	174051313	d8 Nkx2-5 EmGFP	CLK	NOTEST	0.052172	0	#NAME?	0	1	1	no	0.052172	939
XLOC_000577	XLOC_000577	Olfr430	chr1:174069299-174070253	chr1	174069299	174070253	d8 Nkx2-5 EmGFP	CLK	NOTEST	0	0	0	0	1	1	no	0	954
XLOC_000578	XLOC_000578	Olfr429	chr1:174089037-174089980	chr1	174089037	174089980	d8 Nkx2-5 EmGFP	CLK	NOTEST	0	0	0	0	1	1	no	0	943
XLOC_000579	XLOC_000579	Olfr426	chr1:174099459-174100410	chr1	174099459	174100410	d8 Nkx2-5 EmGFP	CLK	NOTEST	0	0	0	0	1	1	no	0	951
XLOC_000580	XLOC_000580	Olfr424	chr1:174136745-174137693	chr1	174136745	174137693	d8 Nkx2-5 EmGFP	CLK	NOTEST	0	0	0	0	1	1	no	0	948
XLOC_000581	XLOC_000581	Olfr421-ps1	chr1:174151480-174152530	chr1	174151480	174152530	d8 Nkx2-5 EmGFP	CLK	NOTEST	0	0.0203969	inf	0	1	1	no	0.0203969	1050
XLOC_000582	XLOC_000582	Olfr420	chr1:174158721-174159767	chr1	174158721	174159767	d8 Nkx2-5 EmGFP	CLK	NOTEST	0	0	0	0	1	1	no	0	1046
XLOC_000583	XLOC_000583	Spna1	chr1:174172775-174248449	chr1	174172775	174248449	d8 Nkx2-5 EmGFP	CLK	OK	0.0579579	2.35951	5.34734	2.76798	0.0351	0.255134	no	2.30155	75674
XLOC_000584	XLOC_000584	1810030J14Rik	chr1:174330517-174332877	chr1	174330517	174332877	d8 Nkx2-5 EmGFP	CLK	NOTEST	0	0	0	0	1	1	no	0	2360
XLOC_000585	XLOC_000585	Olfr417	chr1:174368918-174369848	chr1	174368918	174369848	d8 Nkx2-5 EmGFP	CLK	NOTEST	0	0.0199938	inf	0	1	1	no	0.0199938	930
XLOC_000586	XLOC_000586	Olfr248	chr1:174391045-174392055	chr1	174391045	174392055	d8 Nkx2-5 EmGFP	CLK	NOTEST	0	0	0	0	1	1	no	0	1010
XLOC_000587	XLOC_000587	Olfr414	chr1:174430429-174431384	chr1	174430429	174431384	d8 Nkx2-5 EmGFP	CLK	NOTEST	0	0	0	0	1	1	no	0	955
XLOC_000588	XLOC_000588	Olfr220	chr1:174448624-174449602	chr1	174448624	174449602	d8 Nkx2-5 EmGFP	CLK	NOTEST	0	0	0	0	1	1	no	0	978
XLOC_000589	XLOC_000589	Fmn2	chr1:174501824-174822729	chr1	174501824	174822729	d8 Nkx2-5 EmGFP	CLK	OK	0.820767	0.751965	-0.126308	-0.0631841	0.94685	0.985958	no	0.068802	320905
XLOC_000590	XLOC_000590	Kmo	chr1:175632192-175660853	chr1	175632192	175660853	d8 Nkx2-5 EmGFP	CLK	NOTEST	0.0632284	0	#NAME?	0	1	1	no	0.0632284	28661
XLOC_000591	XLOC_000591	Wdr64	chr1:175698592-175815733	chr1	175698592	175815733	d8 Nkx2-5 EmGFP	CLK	OK	0.0219969	1.58129	6.16766	3.11443	0.10085	0.422033	no	1.55929	117141
XLOC_000592	XLOC_000592	Exo1	chr1:175880555-175911396	chr1	175880555	175911396	d8 Nkx2-5 EmGFP	CLK	OK	4.29273	12.221	1.5094	1.15303	0.26865	0.671049	no	7.92827	30841
XLOC_000593	XLOC_000593	Sdccag8	chr1:176814783-177258838	chr1	176814783	177258838	d8 Nkx2-5 EmGFP	CLK	OK	1.82383	1.0203	-0.837975	-0.167703	0.8725	0.969018	no	0.80353	444055
XLOC_000594	XLOC_000594	Zfp238	chr1:177442547-177450764	chr1	177442547	177450764	d8 Nkx2-5 EmGFP	CLK	OK	3.8088	2.2816	-0.73929	-0.445604	0.66695	0.90474	no	1.5272	8217
XLOC_000595	XLOC_000595	1700016C15Rik	chr1:177729813-177755048	chr1	177729813	177755048	d8 Nkx2-5 EmGFP	CLK	NOTEST	0.00368224	0.0493863	3.74545	0	1	1	no	0.0457041	25235
XLOC_000596	XLOC_000596	Gm16432	chr1:177991434-178048291	chr1	177991434	178048291	d8 Nkx2-5 EmGFP	CLK	NOTEST	0	0	0	0	1	1	no	0	56857
XLOC_000597	XLOC_000597	Pppde1	chr1:178187416-178252711	chr1	178187416	178252711	d8 Nkx2-5 EmGFP	CLK	OK	9.60175	15.9992	0.736629	0.556685	0.5881	0.871382	no	6.39745	65295
XLOC_000598	XLOC_000598	Fam36a	chr1:178319152-178339132	chr1	178319152	178339132	d8 Nkx2-5 EmGFP	CLK	OK	6.88744	21.953	1.67238	0.164413	0.2243	0.634577	no	15.0656	19980
XLOC_000599	XLOC_000599	Efcab2	chr1:178405854-178484609	chr1	178405854	178484609	d8 Nkx2-5 EmGFP	CLK	OK	0.707881	0.611352	-0.211503	-0.103853	0.9256	0.981637	no	0.096529	78755
XLOC_000600	XLOC_000600	Kif26b	chr1:178528911-178939247	chr1	178528911	178939247	d8 Nkx2-5 EmGFP	CLK	OK	9.2511	0.163536	-5.82194	-3.40922	0.01215	0.181005	no	9.08756	410336
XLOC_000601	XLOC_000601	Cnst	chr1:179546528-179627473	chr1	179546528	179627473	d8 Nkx2-5 EmGFP	CLK	OK	3.00464	3.02633	0.0103772	0.00695618	0.99365	0.9977	no	0.02169	80945
XLOC_000602	XLOC_000602	Sccpdh	chr1:179668230-179687184	chr1	179668230	179687184	d8 Nkx2-5 EmGFP	CLK	OK	23.3182	10.3292	-1.17473	-1.00956	0.42425	0.780003	no	12.989	18954
XLOC_000603	XLOC_000603	Cdc42bpa	chr1:179959973-180199553	chr1	179959973	180199553	d8 Nkx2-5 EmGFP	CLK	OK	4.95645	3.42275	-0.534152	-0.364744	0.7259	0.928183	no	1.5337	239580
XLOC_000604	XLOC_000604	Itpkb	chr1:180326968-180424798	chr1	180326968	180424798	d8 Nkx2-5 EmGFP	CLK	OK	5.66744	3.22408	-0.813807	-0.594734	0.56875	0.862104	no	2.44336	97830
XLOC_000605	XLOC_000605	Parp1	chr1:180568974-180601254	chr1	180568974	180601254	d8 Nkx2-5 EmGFP	CLK	OK	84.3424	187.876	1.15545	0.935861	0.3295	0.72013	no	103.534	32280
XLOC_000606	XLOC_000606	Lin9	chr1:180641249-180690687	chr1	180641249	180690687	d8 Nkx2-5 EmGFP	CLK	OK	3.56535	5.20969	0.547153	0.343128	0.73785	0.932315	no	1.64434	49438
XLOC_000607	XLOC_000607	Acbd3	chr1:180726027-180757899	chr1	180726027	180757899	d8 Nkx2-5 EmGFP	CLK	OK	16.1131	5.84509	-1.46294	-1.07182	0.3058	0.702341	no	10.268	31872
XLOC_000608	XLOC_000608	BC031781	chr1:180851150-180868114	chr1	180851150	180868114	d8 Nkx2-5 EmGFP	CLK	OK	17.7102	31.2174	0.817771	0.782553	0.5299	0.84179	no	13.5072	16964
XLOC_000609	XLOC_000609	Lefty2	chr1:180893118-180899102	chr1	180893118	180899102	d8 Nkx2-5 EmGFP	CLK	OK	2.06469	43.1896	4.38668	3.0834	0.02835	0.248259	no	41.1249	5984
XLOC_000610	XLOC_000610	Pycr2	chr1:180904273-180908088	chr1	180904273	180908088	d8 Nkx2-5 EmGFP	CLK	OK	46.3992	100.774	1.11895	0.945219	0.36655	0.744607	no	54.3748	3815
XLOC_000611	XLOC_000611	Lefty1	chr1:180935038-180938401	chr1	180935038	180938401	d8 Nkx2-5 EmGFP	CLK	OK	2.32099	164.812	6.14993	4.1407	0.0105	0.168825	no	162.491	3363
XLOC_000612	XLOC_000612	Tmem63a	chr1:180941965-180975104	chr1	180941965	180975104	d8 Nkx2-5 EmGFP	CLK	OK	4.92303	10.4736	1.08914	0.762201	0.467	0.805771	no	5.55057	33139
XLOC_000613	XLOC_000613	9130409I23Rik	chr1:181051236-181060667	chr1	181051236	181060667	d8 Nkx2-5 EmGFP	CLK	NOTEST	0	0.0047006	inf	0	1	1	no	0.0047006	9431
XLOC_000614	XLOC_000614	Cnih4	chr1:181150387-181168994	chr1	181150387	181168994	d8 Nkx2-5 EmGFP	CLK	OK	13.2256	15.1046	0.191652	0.146268	0.88625	0.972126	no	1.879	18607
XLOC_000615	XLOC_000615	-	chr1:181211990-181234936	chr1	181211990	181234936	d8 Nkx2-5 EmGFP	CLK	NOTEST	0.0663391	0.0717909	0.113941	0	1	1	no	0.0054518	22946
XLOC_000616	XLOC_000616	Cnih3	chr1:181352627-181460641	chr1	181352627	181460641	d8 Nkx2-5 EmGFP	CLK	OK	0.110545	0.209975	0.925583	0.441989	0.6878	0.912626	no	0.09943	108014
XLOC_000617	XLOC_000617	-	chr1:181752031-181757779	chr1	181752031	181757779	d8 Nkx2-5 EmGFP	CLK	OK	0	0.183676	inf	#NAME?	0.03255	0.255134	no	0.183676	5748
XLOC_000618	XLOC_000618	Lbr	chr1:181809061-181842401	chr1	181809061	181842401	d8 Nkx2-5 EmGFP	CLK	OK	0.23646	0.164974	-0.519356	-0.0204654	0.09875	0.417248	no	0.071486	33340
XLOC_000619	XLOC_000619	-	chr1:181881200-181886617	chr1	181881200	181886617	d8 Nkx2-5 EmGFP	CLK	OK	0	0.275798	inf	#NAME?	0.0242	0.239279	no	0.275798	5417
XLOC_000620	XLOC_000620	-	chr1:182020190-182031330	chr1	182020190	182031330	d8 Nkx2-5 EmGFP	CLK	OK	0.632184	1.7313	1.45344	0.589973	0.6072	0.879953	no	1.09912	11140
XLOC_000621	XLOC_000621	Srp9	chr1:182124736-182132415	chr1	182124736	182132415	d8 Nkx2-5 EmGFP	CLK	OK	21.1314	27.1073	0.359298	0.259766	0.8012	0.950482	no	5.9759	7679
XLOC_000622	XLOC_000622	1700047M11Rik	chr1:182300833-182303289	chr1	182300833	182303289	d8 Nkx2-5 EmGFP	CLK	NOTEST	0	0	0	0	1	1	no	0	2456
XLOC_000623	XLOC_000623	Trp53bp2	chr1:182409166-182462436	chr1	182409166	182462436	d8 Nkx2-5 EmGFP	CLK	OK	9.60428	9.93578	0.0489563	0.0359007	0.9708	0.990751	no	0.3315	53270
XLOC_000624	XLOC_000624	Capn8	chr1:182565006-182632352	chr1	182565006	182632352	d8 Nkx2-5 EmGFP	CLK	NOTEST	0	0	0	0	1	1	no	0	67346
XLOC_000625	XLOC_000625	Susd4	chr1:182764164-182896589	chr1	182764164	182896589	d8 Nkx2-5 EmGFP	CLK	OK	2.46715	6.3188	1.3568	0.852796	0.4119	0.772009	no	3.85165	132425
XLOC_000626	XLOC_000626	Tlr5	chr1:182954787-182976044	chr1	182954787	182976044	d8 Nkx2-5 EmGFP	CLK	OK	0.762891	0.0953341	-3.00041	-1.63612	0.23155	0.640287	no	0.667557	21257
XLOC_000627	XLOC_000627	Aida	chr1:183276341-183369749	chr1	183276341	183369749	d8 Nkx2-5 EmGFP	CLK	OK	6.88349	8.91997	0.373899	0.156841	0.9082	0.977277	no	2.03648	93408
XLOC_000628	XLOC_000628	Taf1a	chr1:183387898-183413823	chr1	183387898	183413823	d8 Nkx2-5 EmGFP	CLK	OK	3.34443	2.89008	-0.210652	-0.120106	0.91	0.97763	no	0.45435	25925
XLOC_000629	XLOC_000629	Hhipl2	chr1:183418502-183437053	chr1	183418502	183437053	d8 Nkx2-5 EmGFP	CLK	NOTEST	0.0616416	0.0145522	-2.08266	0	1	1	no	0.0470894	18551
XLOC_000630	XLOC_000630	Dusp10	chr1:184034460-184075636	chr1	184034460	184075636	d8 Nkx2-5 EmGFP	CLK	OK	3.52576	1.80951	-0.962333	-0.641479	0.6149	0.883698	no	1.71625	41176
XLOC_000631	XLOC_000631	4930488B22Rik	chr1:184712496-184718989	chr1	184712496	184718989	d8 Nkx2-5 EmGFP	CLK	NOTEST	0	0	0	0	1	1	no	0	6493
XLOC_000632	XLOC_000632	-	chr1:184782466-184784453	chr1	184782466	184784453	d8 Nkx2-5 EmGFP	CLK	OK	0.175039	0.0343907	-2.34758	-1.1151	0.4303	0.78296	no	0.140648	1987
XLOC_000633	XLOC_000633	Rab3gap2	chr1:185204086-185329401	chr1	185204086	185329401	d8 Nkx2-5 EmGFP	CLK	OK	9.34153	14.5815	0.642408	0.417577	0.71255	0.923736	no	5.23997	125315
XLOC_000634	XLOC_000634	Mir664,Snora36b	chr1:185204086-185329401	chr1	185204086	185329401	d8 Nkx2-5 EmGFP	CLK	NOTEST	0	0	0	0	1	1	no	0	125315
XLOC_000635	XLOC_000635	Mir194-1	chr1:185204086-185329401	chr1	185204086	185329401	d8 Nkx2-5 EmGFP	CLK	NOTEST	0	0	0	0	1	1	no	0	125315
XLOC_000636	XLOC_000636	Mir215	chr1:185204086-185329401	chr1	185204086	185329401	d8 Nkx2-5 EmGFP	CLK	NOTEST	0	0	0	0	1	1	no	0	125315
XLOC_000637	XLOC_000637	Bpnt1	chr1:185332117-185357769	chr1	185332117	185357769	d8 Nkx2-5 EmGFP	CLK	OK	6.68867	22.3798	1.74241	1.21377	0.25185	0.657138	no	15.6911	25652
XLOC_000638	XLOC_000638	Eprs	chr1:185363094-185428355	chr1	185363094	185428355	d8 Nkx2-5 EmGFP	CLK	OK	50.7565	115.07	1.18085	0.981357	0.3235	0.71556	no	64.3135	65261
XLOC_000639	XLOC_000639	Slc30a10	chr1:185447115-185468762	chr1	185447115	185468762	d8 Nkx2-5 EmGFP	CLK	OK	0.77429	0.0510568	-3.9227	-1.89963	0.12225	0.471701	no	0.723233	21647
XLOC_000640	XLOC_000640	5033404E19Rik	chr1:185497305-185498014	chr1	185497305	185498014	d8 Nkx2-5 EmGFP	CLK	OK	0.0463071	0.327261	2.82114	1.61498	0.37025	0.747092	no	0.280954	709
XLOC_000641	XLOC_000641	Mir297c	chr1:185537335-185988795	chr1	185537335	185988795	d8 Nkx2-5 EmGFP	CLK	NOTEST	0	0	0	0	1	1	no	0	451460
XLOC_000642	XLOC_000642	-	chr1:186587172-186613787	chr1	186587172	186613787	d8 Nkx2-5 EmGFP	CLK	OK	0.037868	0.252379	2.73654	1.20988	0.3327	0.722359	no	0.214511	26615
XLOC_000643	XLOC_000643	D1Pas1	chr1:186967415-186970627	chr1	186967415	186970627	d8 Nkx2-5 EmGFP	CLK	OK	0.43423	9.95636	4.51909	2.80911	0.0441	0.265051	no	9.52213	3212
XLOC_000644	XLOC_000644	1700007P06Rik	chr1:187048406-187215446	chr1	187048406	187215446	d8 Nkx2-5 EmGFP	CLK	NOTEST	0	0	0	0	1	1	no	0	167040
XLOC_000645	XLOC_000645	Gpatch2	chr1:187215504-187351690	chr1	187215504	187351690	d8 Nkx2-5 EmGFP	CLK	OK	4.25543	4.12501	-0.0449048	-0.0299895	0.9762	0.991988	no	0.13042	136186
XLOC_000646	XLOC_000646	Esrrg	chr1:187608740-188214951	chr1	187608740	188214951	d8 Nkx2-5 EmGFP	CLK	OK	1.94502	0.026867	-6.17781	-3.16708	0.0486	0.270019	no	1.91815	606211
XLOC_000647	XLOC_000647	Mir5111	chr1:187608740-188214951	chr1	187608740	188214951	d8 Nkx2-5 EmGFP	CLK	NOTEST	0	0	0	0	1	1	no	0	606211
XLOC_000648	XLOC_000648	Ush2a	chr1:188262837-188965678	chr1	188262837	188965678	d8 Nkx2-5 EmGFP	CLK	OK	0.00651301	0.091859	3.81803	1.6761	0.16445	0.553182	no	0.085346	702841
XLOC_000649	XLOC_000649	Ptpn14	chr1:189728267-189876693	chr1	189728267	189876693	d8 Nkx2-5 EmGFP	CLK	OK	6.26572	20.9981	1.74471	1.54106	0.1709	0.563009	no	14.7324	148426
XLOC_000650	XLOC_000650	Angel2	chr1:190925107-190946691	chr1	190925107	190946691	d8 Nkx2-5 EmGFP	CLK	OK	6.82533	10.7611	0.656855	0.468839	0.6453	0.896117	no	3.93577	21584
XLOC_000651	XLOC_000651	A230020J21Rik	chr1:191005831-191029781	chr1	191005831	191029781	d8 Nkx2-5 EmGFP	CLK	OK	0.0201622	0.730967	5.18008	0.21691	0.2977	0.69497	no	0.710805	23950
XLOC_000652	XLOC_000652	1700022P22Rik	chr1:191036301-191042941	chr1	191036301	191042941	d8 Nkx2-5 EmGFP	CLK	OK	0.03399	0.479497	3.81834	1.34429	0.1758	0.570289	no	0.445507	6640
XLOC_000653	XLOC_000653	Nsl1	chr1:191045829-191084615	chr1	191045829	191084615	d8 Nkx2-5 EmGFP	CLK	OK	5.60388	2.27433	-1.30098	-0.706771	0.5036	0.828593	no	3.32955	38786
XLOC_000654	XLOC_000654	Batf3	chr1:191097851-191108943	chr1	191097851	191108943	d8 Nkx2-5 EmGFP	CLK	OK	1.03718	1.25258	0.272239	0.130914	0.9011	0.975528	no	0.2154	11092
XLOC_000655	XLOC_000655	-	chr1:191224460-191225873	chr1	191224460	191225873	d8 Nkx2-5 EmGFP	CLK	OK	1.67282	0.179953	-3.21659	-1.3976	0.24315	0.653064	no	1.49287	1413
XLOC_000656	XLOC_000656	Tmem206	chr1:191325964-191397266	chr1	191325964	191397266	d8 Nkx2-5 EmGFP	CLK	OK	3.69301	2.97143	-0.313638	-0.131833	0.90645	0.976897	no	0.72158	71302
XLOC_000657	XLOC_000657	Ints7	chr1:191537364-191622584	chr1	191537364	191622584	d8 Nkx2-5 EmGFP	CLK	OK	15.5761	26.7003	0.777524	0.520574	0.6067	0.879827	no	11.1242	85220
XLOC_000658	XLOC_000658	Lpgat1	chr1:191718023-191784257	chr1	191718023	191784257	d8 Nkx2-5 EmGFP	CLK	OK	10.7521	6.76641	-0.66815	-0.523646	0.60985	0.881077	no	3.98569	66234
XLOC_000659	XLOC_000659	Nek2	chr1:191820151-191833049	chr1	191820151	191833049	d8 Nkx2-5 EmGFP	CLK	OK	9.97266	27.7243	1.4751	1.15837	0.2746	0.675476	no	17.7516	12898
XLOC_000660	XLOC_000660	Slc30a1	chr1:191894071-191913247	chr1	191894071	191913247	d8 Nkx2-5 EmGFP	CLK	OK	3.97683	4.71769	0.246461	0.169134	0.87175	0.968928	no	0.74086	19176
XLOC_000661	XLOC_000661	Rd3	chr1:191977372-191990129	chr1	191977372	191990129	d8 Nkx2-5 EmGFP	CLK	OK	0.0842318	0.0219082	-1.9429	-0.795963	0.5104	0.831836	no	0.0623236	12757
XLOC_000662	XLOC_000662	Gm10516	chr1:192098574-192151025	chr1	192098574	192151025	d8 Nkx2-5 EmGFP	CLK	OK	0.110215	0.00272438	-5.33824	-0.209167	0.19345	0.596327	no	0.107491	52451
XLOC_000663	XLOC_000663	Kcnh1	chr1:192190871-192510158	chr1	192190871	192510158	d8 Nkx2-5 EmGFP	CLK	OK	0.0775809	0.269661	1.79737	0.889025	0.43305	0.784183	no	0.19208	319287
XLOC_000664	XLOC_000664	1700065J18Rik	chr1:192841704-192842739	chr1	192841704	192842739	d8 Nkx2-5 EmGFP	CLK	NOTEST	0	0	0	0	1	1	no	0	1035
XLOC_000665	XLOC_000665	Sertad4	chr1:192844486-192856920	chr1	192844486	192856920	d8 Nkx2-5 EmGFP	CLK	OK	0.398671	0.164451	-1.27754	-0.116443	0.39425	0.760517	no	0.23422	12434
XLOC_000666	XLOC_000666	Irf6	chr1:193153111-193172035	chr1	193153111	193172035	d8 Nkx2-5 EmGFP	CLK	OK	2.14845	2.28785	0.0906908	0.0596909	0.95825	0.988043	no	0.1394	18924
XLOC_000667	XLOC_000667	A130010J15Rik	chr1:193173468-193201546	chr1	193173468	193201546	d8 Nkx2-5 EmGFP	CLK	OK	3.28093	1.94435	-0.754817	-0.486022	0.6774	0.907994	no	1.33658	28078
XLOC_000668	XLOC_000668	Lamb3	chr1:193294399-193343878	chr1	193294399	193343878	d8 Nkx2-5 EmGFP	CLK	OK	0.300849	1.40123	2.21958	1.16513	0.2906	0.689437	no	1.10038	49479
XLOC_000669	XLOC_000669	Plxna2	chr1:194619828-194816868	chr1	194619828	194816868	d8 Nkx2-5 EmGFP	CLK	OK	3.23218	0.584781	-2.46654	-1.59038	0.1498	0.525414	no	2.6474	197040
XLOC_000670	XLOC_000670	Cd34	chr1:194938820-194976959	chr1	194938820	194976959	d8 Nkx2-5 EmGFP	CLK	OK	16.6618	2.04886	-3.02365	-1.96356	0.0931	0.403238	no	14.6129	38139
XLOC_000671	XLOC_000671	A330023F24Rik,Mir29b-2,Mir29c	chr1:195017398-195037908	chr1	195017398	195037908	d8 Nkx2-5 EmGFP	CLK	NOTEST	0.0176848	0.0042196	-2.06734	0	1	1	no	0.0134652	20510
XLOC_000672	XLOC_000672	Xkr4	chr1:3204786-3671511	chr1	3204786	3671511	d8 Nkx2-5 EmGFP	CLK	OK	0.168452	0.877408	2.38091	1.01115	0.332	0.722054	no	0.708956	466725
XLOC_000673	XLOC_000673	Rp1	chr1:4290845-4409241	chr1	4290845	4409241	d8 Nkx2-5 EmGFP	CLK	NOTEST	0.00125528	0	#NAME?	0	1	1	no	0.00125528	118396
XLOC_000674	XLOC_000674	Sox17	chr1:4490927-4496413	chr1	4490927	4496413	d8 Nkx2-5 EmGFP	CLK	OK	5.39995	0.0721916	-6.22497	-3.26179	0.04535	0.267768	no	5.32776	5486
XLOC_000675	XLOC_000675	Mrpl15	chr1:4764697-4786230	chr1	4764697	4786230	d8 Nkx2-5 EmGFP	CLK	OK	16.5526	77.3781	2.22487	1.71323	0.0935	0.403932	no	60.8255	21533
XLOC_000676	XLOC_000676	Rgs20	chr1:4904448-5070285	chr1	4904448	5070285	d8 Nkx2-5 EmGFP	CLK	OK	1.74807	0.719522	-1.28065	-0.58443	0.59585	0.874602	no	1.02855	165837
XLOC_000677	XLOC_000677	Npbwr1	chr1:5913706-5917973	chr1	5913706	5917973	d8 Nkx2-5 EmGFP	CLK	OK	1.34565	0.0043573	-8.27065	-3.39267	0.17635	0.571065	no	1.34129	4267
XLOC_000678	XLOC_000678	-	chr1:7314664-7398035	chr1	7314664	7398035	d8 Nkx2-5 EmGFP	CLK	OK	0.203027	0.515171	1.34338	0.67067	0.6745	0.907309	no	0.312144	83371
XLOC_000679	XLOC_000679	Sntg1	chr1:8359597-9299884	chr1	8359597	9299884	d8 Nkx2-5 EmGFP	CLK	OK	0.0962018	0.0103915	-3.21066	-0.644237	0.36265	0.742633	no	0.0858103	940287
XLOC_000680	XLOC_000680	2610203C22Rik	chr1:9548045-9631580	chr1	9548045	9631580	d8 Nkx2-5 EmGFP	CLK	NOTEST	0.0581119	0	#NAME?	0	1	1	no	0.0581119	83535
XLOC_000681	XLOC_000681	Mybl1	chr1:9667406-9700407	chr1	9667406	9700407	d8 Nkx2-5 EmGFP	CLK	OK	1.21847	0.560853	-1.11938	-0.58086	0.5928	0.873436	no	0.657617	33001
XLOC_000682	XLOC_000682	Vcpip1	chr1:9720716-9772521	chr1	9720716	9772521	d8 Nkx2-5 EmGFP	CLK	OK	6.64989	6.18323	-0.10497	-0.0826458	0.9401	0.984339	no	0.46666	51805
XLOC_000683	XLOC_000683	Snhg6	chr1:9942024-9944200	chr1	9942024	9944200	d8 Nkx2-5 EmGFP	CLK	OK	53.4506	18.801	-1.5074	-0.809436	0.43215	0.783991	no	34.6496	2176
XLOC_000684	XLOC_000684	Snord87	chr1:9942024-9944200	chr1	9942024	9944200	d8 Nkx2-5 EmGFP	CLK	NOTEST	0	0	0	0	1	1	no	0	2176
XLOC_000685	XLOC_000685	-	chr1:9960174-9967346	chr1	9960174	9967346	d8 Nkx2-5 EmGFP	CLK	OK	0.74701	0.745312	-0.00328353	-0.00210866	0.99745	0.998867	no	0.001698	7172
XLOC_000686	XLOC_000686	-	chr1:9967460-9967930	chr1	9967460	9967930	d8 Nkx2-5 EmGFP	CLK	OK	0.536331	0.986956	0.87986	1.111	0.7372	0.932096	no	0.450625	470
XLOC_000687	XLOC_000687	Ppp1r42	chr1:9968625-10009130	chr1	9968625	10009130	d8 Nkx2-5 EmGFP	CLK	NOTEST	0	0	0	0	1	1	no	0	40505
XLOC_000688	XLOC_000688	Cops5	chr1:10024830-10037898	chr1	10024830	10037898	d8 Nkx2-5 EmGFP	CLK	OK	57.0302	110.44	0.953461	0.965441	0.45095	0.795024	no	53.4098	13068
XLOC_000689	XLOC_000689	Arfgef1	chr1:10137506-10232670	chr1	10137506	10232670	d8 Nkx2-5 EmGFP	CLK	OK	11.2523	8.60626	-0.386768	-0.335462	0.7611	0.940356	no	2.64604	95164
XLOC_000690	XLOC_000690	Cpa6	chr1:10324726-10865874	chr1	10324726	10865874	d8 Nkx2-5 EmGFP	CLK	OK	0.190497	0	#NAME?	#NAME?	0.01205	0.179692	no	0.190497	541148
XLOC_000691	XLOC_000691	Mir467e	chr1:10324726-10865874	chr1	10324726	10865874	d8 Nkx2-5 EmGFP	CLK	NOTEST	0	0	0	0	1	1	no	0	541148
XLOC_000692	XLOC_000692	Slco5a1	chr1:12866549-12992728	chr1	12866549	12992728	d8 Nkx2-5 EmGFP	CLK	OK	0.105505	1.17578	3.47825	1.86767	0.1131	0.452199	no	1.07028	126179
XLOC_000693	XLOC_000693	Prdm14	chr1:13113427-13127163	chr1	13113427	13127163	d8 Nkx2-5 EmGFP	CLK	OK	0.170189	5.22323	4.93973	3.01605	0.0489	0.270019	no	5.05304	13736
XLOC_000694	XLOC_000694	Ncoa2	chr1:13139123-13374462	chr1	13139123	13374462	d8 Nkx2-5 EmGFP	CLK	OK	7.07955	4.63013	-0.612605	-0.47132	0.6447	0.89574	no	2.44942	235339
XLOC_000695	XLOC_000695	Tram1	chr1:13564701-13589864	chr1	13564701	13589864	d8 Nkx2-5 EmGFP	CLK	OK	34.4307	34.3661	-0.00270928	-0.00299521	0.9979	0.99902	no	0.0646	25163
XLOC_000696	XLOC_000696	Lactb2	chr1:13624948-13660623	chr1	13624948	13660623	d8 Nkx2-5 EmGFP	CLK	OK	9.38554	14.744	0.651617	0.446281	0.66685	0.904726	no	5.35846	35675
XLOC_000697	XLOC_000697	Gm5523	chr1:13785684-13786929	chr1	13785684	13786929	d8 Nkx2-5 EmGFP	CLK	NOTEST	0.0597168	0.0473188	-0.335724	0	1	1	no	0.012398	1245
XLOC_000698	XLOC_000698	Eya1	chr1:14168935-14310226	chr1	14168935	14310226	d8 Nkx2-5 EmGFP	CLK	OK	0.846186	1.38218	0.707901	0.374157	0.72895	0.929319	no	0.535994	141291
XLOC_000699	XLOC_000699	Msc	chr1:14753345-14755966	chr1	14753345	14755966	d8 Nkx2-5 EmGFP	CLK	OK	0.502073	3.93482	2.97033	1.45454	0.19405	0.596826	no	3.43275	2621
XLOC_000700	XLOC_000700	Trpa1	chr1:14872647-14919436	chr1	14872647	14919436	d8 Nkx2-5 EmGFP	CLK	OK	0.017583	1.08421	5.94633	2.84206	0.08265	0.373895	no	1.06663	46789
XLOC_000701	XLOC_000701	Gm106	chr1:15853861-15892722	chr1	15853861	15892722	d8 Nkx2-5 EmGFP	CLK	OK	0.152057	0.127355	-0.255753	-0.119614	0.91455	0.978661	no	0.024702	38861
XLOC_000702	XLOC_000702	4930444P10Rik	chr1:16065978-16093041	chr1	16065978	16093041	d8 Nkx2-5 EmGFP	CLK	NOTEST	0.0594414	0.0233957	-1.34522	0	1	1	no	0.0360457	27063
XLOC_000703	XLOC_000703	Rpl7	chr1:16100875-16105192	chr1	16100875	16105192	d8 Nkx2-5 EmGFP	CLK	OK	174.289	3545.23	4.34632	3.58117	0.0021	0.0671922	no	3370.94	4317
XLOC_000704	XLOC_000704	Stau2	chr1:16228809-16520074	chr1	16228809	16520074	d8 Nkx2-5 EmGFP	CLK	OK	3.86462	3.10226	-0.31701	-0.192875	0.85635	0.964503	no	0.76236	291265
XLOC_000705	XLOC_000705	Ube2w	chr1:16569405-16619332	chr1	16569405	16619332	d8 Nkx2-5 EmGFP	CLK	OK	12.1015	7.08628	-0.772084	-0.50911	0.6266	0.888509	no	5.01522	49927
XLOC_000706	XLOC_000706	Tceb1	chr1:16641637-16657307	chr1	16641637	16657307	d8 Nkx2-5 EmGFP	CLK	OK	44.9942	48.2404	0.100501	0.071518	0.9395	0.984339	no	3.2462	15670
XLOC_000707	XLOC_000707	Jph1	chr1:16994939-17097889	chr1	16994939	17097889	d8 Nkx2-5 EmGFP	CLK	OK	2.61533	2.37886	-0.136719	-0.0841772	0.9361	0.983718	no	0.23647	102950
XLOC_000708	XLOC_000708	-	chr1:17997412-17999592	chr1	17997412	17999592	d8 Nkx2-5 EmGFP	CLK	OK	0	0.241209	inf	#NAME?	0.04125	0.255134	no	0.241209	2180
XLOC_000709	XLOC_000709	Crisp4	chr1:18115190-18137051	chr1	18115190	18137051	d8 Nkx2-5 EmGFP	CLK	NOTEST	0	0	0	0	1	1	no	0	21861
XLOC_000710	XLOC_000710	Defb44-ps	chr1:18210052-18223564	chr1	18210052	18223564	d8 Nkx2-5 EmGFP	CLK	NOTEST	0	0	0	0	1	1	no	0	13512
XLOC_000711	XLOC_000711	Defb18	chr1:18236472-18237443	chr1	18236472	18237443	d8 Nkx2-5 EmGFP	CLK	NOTEST	0	0	0	0	1	1	no	0	971
XLOC_000712	XLOC_000712	Defb41,Gm15386	chr1:18250977-18265138	chr1	18250977	18265138	d8 Nkx2-5 EmGFP	CLK	NOTEST	0	0	0	0	1	1	no	0	14161
XLOC_000713	XLOC_000713	Pkhd1	chr1:20057778-20618057	chr1	20057778	20618057	d8 Nkx2-5 EmGFP	CLK	OK	0.000654298	0.506265	9.59573	1.87656	0.1728	0.565642	no	0.505611	560279
XLOC_000714	XLOC_000714	Il17f	chr1:20777145-20784270	chr1	20777145	20784270	d8 Nkx2-5 EmGFP	CLK	NOTEST	0.0559153	0.0189757	-1.55909	0	1	1	no	0.0369396	7125
XLOC_000715	XLOC_000715	Mcm3	chr1:20803013-20820213	chr1	20803013	20820213	d8 Nkx2-5 EmGFP	CLK	OK	75.4827	215.769	1.51527	1.27404	0.20825	0.615642	no	140.286	17200
XLOC_000716	XLOC_000716	6720483E21Rik	chr1:20888649-20890473	chr1	20888649	20890473	d8 Nkx2-5 EmGFP	CLK	NOTEST	0	0	0	0	1	1	no	0	1824
XLOC_000717	XLOC_000717	Tram2	chr1:20996273-21079242	chr1	20996273	21079242	d8 Nkx2-5 EmGFP	CLK	OK	12.1148	4.23811	-1.51528	-0.89713	0.31265	0.707725	no	7.87669	82969
XLOC_000718	XLOC_000718	-	chr1:21166397-21193302	chr1	21166397	21193302	d8 Nkx2-5 EmGFP	CLK	OK	0	1.99427	inf	#NAME?	0.11625	0.459551	no	1.99427	26905
XLOC_000719	XLOC_000719	Gm4956	chr1:21285245-21298312	chr1	21285245	21298312	d8 Nkx2-5 EmGFP	CLK	NOTEST	0	0	0	0	1	1	no	0	13067
XLOC_000720	XLOC_000720	Kcnq5	chr1:21398402-21973459	chr1	21398402	21973459	d8 Nkx2-5 EmGFP	CLK	OK	2.43683	0.277261	-3.13569	-1.84358	0.1186	0.46469	no	2.15957	575057
XLOC_000721	XLOC_000721	Rims1	chr1:22286006-22432843	chr1	22286006	22432843	d8 Nkx2-5 EmGFP	CLK	OK	0.0341818	1.11964	5.03366	2.42066	0.03605	0.255134	no	1.08546	146837
XLOC_000722	XLOC_000722	Rims1	chr1:22468190-22805724	chr1	22468190	22805724	d8 Nkx2-5 EmGFP	CLK	OK	0.0165729	0.274989	4.05247	1.70738	0.23665	0.645461	no	0.258416	337534
XLOC_000723	XLOC_000723	4933415F23Rik	chr1:23100473-23102253	chr1	23100473	23102253	d8 Nkx2-5 EmGFP	CLK	NOTEST	0	0	0	0	1	1	no	0	1780
XLOC_000724	XLOC_000724	Ogfrl1	chr1:23366423-23383175	chr1	23366423	23383175	d8 Nkx2-5 EmGFP	CLK	OK	2.0317	1.78202	-0.189172	-0.111537	0.91845	0.979446	no	0.24968	16752
XLOC_000725	XLOC_000725	Smap1	chr1:23761925-23922289	chr1	23761925	23922289	d8 Nkx2-5 EmGFP	CLK	OK	23.8536	22.0584	-0.112881	-0.0877649	0.93195	0.983139	no	1.7952	160364
XLOC_000726	XLOC_000726	1110058L19Rik	chr1:23995938-24005640	chr1	23995938	24005640	d8 Nkx2-5 EmGFP	CLK	OK	16.7316	11.5964	-0.528894	-0.435983	0.7796	0.945595	no	5.1352	9702
XLOC_000727	XLOC_000727	Fam135a	chr1:24010757-24100341	chr1	24010757	24100341	d8 Nkx2-5 EmGFP	CLK	OK	5.83789	2.76688	-1.07719	-0.740589	0.47645	0.811865	no	3.07101	89584
XLOC_000728	XLOC_000728	Col19a1	chr1:24257682-24587437	chr1	24257682	24587437	d8 Nkx2-5 EmGFP	CLK	NOTEST	0.00767168	0	#NAME?	0	1	1	no	0.00767168	329755
XLOC_000729	XLOC_000729	Bai3	chr1:25067475-25829785	chr1	25067475	25829785	d8 Nkx2-5 EmGFP	CLK	OK	0.0374984	0.184582	2.29936	0.731164	0.4471	0.792198	no	0.147084	762310
XLOC_000730	XLOC_000730	Gm20172	chr1:25067475-25829785	chr1	25067475	25829785	d8 Nkx2-5 EmGFP	CLK	NOTEST	0	0.0314294	inf	0	1	1	no	0.0314294	762310
XLOC_000731	XLOC_000731	4931408C20Rik	chr1:26681800-26687460	chr1	26681800	26687460	d8 Nkx2-5 EmGFP	CLK	NOTEST	0	0	0	0	1	1	no	0	5660
XLOC_000732	XLOC_000732	Gm597	chr1:28776121-28780252	chr1	28776121	28780252	d8 Nkx2-5 EmGFP	CLK	NOTEST	0	0	0	0	1	1	no	0	4131
XLOC_000733	XLOC_000733	Phf3	chr1:30802341-30873868	chr1	30802341	30873868	d8 Nkx2-5 EmGFP	CLK	OK	9.48708	22.5838	1.25125	1.03589	0.31185	0.707015	no	13.0967	71527
XLOC_000734	XLOC_000734	Ptp4a1	chr1:30940302-30950118	chr1	30940302	30950118	d8 Nkx2-5 EmGFP	CLK	OK	2.4574	30.5229	3.63469	2.44572	0.03815	0.255134	no	28.0655	9816
XLOC_000735	XLOC_000735	-	chr1:30977004-30999886	chr1	30977004	30999886	d8 Nkx2-5 EmGFP	CLK	OK	0.0607702	0.324101	2.41501	0.988628	0.3976	0.763237	no	0.263331	22882
XLOC_000736	XLOC_000736	4931428L18Rik	chr1:31141077-31222656	chr1	31141077	31222656	d8 Nkx2-5 EmGFP	CLK	NOTEST	0	0.015541	inf	0	1	1	no	0.015541	81579
XLOC_000737	XLOC_000737	Gm9839	chr1:32172805-32657738	chr1	32172805	32657738	d8 Nkx2-5 EmGFP	CLK	NOTEST	0	0	0	0	1	1	no	0	484933
XLOC_000738	XLOC_000738	Gm5415	chr1:32172805-32657738	chr1	32172805	32657738	d8 Nkx2-5 EmGFP	CLK	NOTEST	0	0	0	0	1	1	no	0	484933
XLOC_000739	XLOC_000739	Prim2	chr1:33453810-33669758	chr1	33453810	33669758	d8 Nkx2-5 EmGFP	CLK	OK	14.1096	21.9241	0.635835	0.522627	0.64965	0.898049	no	7.8145	215948
XLOC_000740	XLOC_000740	Bag2	chr1:33745483-33757750	chr1	33745483	33757750	d8 Nkx2-5 EmGFP	CLK	OK	15.615	4.89963	-1.67219	-1.14352	0.3008	0.697827	no	10.7154	12267
XLOC_000741	XLOC_000741	Zfp451	chr1:33761613-33815512	chr1	33761613	33815512	d8 Nkx2-5 EmGFP	CLK	OK	9.1209	11.8972	0.383377	0.278482	0.78185	0.945601	no	2.7763	53899
XLOC_000742	XLOC_000742	Gm15455	chr1:33835898-33838914	chr1	33835898	33838914	d8 Nkx2-5 EmGFP	CLK	OK	2.06281	0.169413	-3.60599	-1.74463	0.1213	0.470074	no	1.8934	3016
XLOC_000743	XLOC_000743	Bend6	chr1:33852051-33907621	chr1	33852051	33907621	d8 Nkx2-5 EmGFP	CLK	OK	0.833158	0.189329	-2.1377	-1.15293	0.37595	0.749465	no	0.643829	55570
XLOC_000744	XLOC_000744	Mir5103	chr1:34425757-34433274	chr1	34425757	34433274	d8 Nkx2-5 EmGFP	CLK	OK	0.135029	0.0310266	-2.12169	-0.420383	0.41625	0.774852	no	0.104002	7517
XLOC_000745	XLOC_000745	Ccdc115	chr1:34436669-34439672	chr1	34436669	34439672	d8 Nkx2-5 EmGFP	CLK	OK	5.89083	4.8932	-0.267692	-0.172818	0.8764	0.970203	no	0.99763	3003
XLOC_000746	XLOC_000746	Prss40	chr1:34552330-34560943	chr1	34552330	34560943	d8 Nkx2-5 EmGFP	CLK	NOTEST	0.0138202	0.016143	0.224127	0	1	1	no	0.0023228	8613
XLOC_000747	XLOC_000747	AA619741	chr1:34633534-34636210	chr1	34633534	34636210	d8 Nkx2-5 EmGFP	CLK	NOTEST	0	0.00243862	inf	0	1	1	no	0.00243862	2676
XLOC_000748	XLOC_000748	Fam168b	chr1:34678148-34843050	chr1	34678148	34843050	d8 Nkx2-5 EmGFP	CLK	OK	41.2581	16.9205	-1.28591	-1.03983	0.3066	0.702986	no	24.3376	164902
XLOC_000749	XLOC_000749	-	chr1:36001775-36011146	chr1	36001775	36011146	d8 Nkx2-5 EmGFP	CLK	OK	0.0102727	0.559428	5.76706	2.36868	0.1563	0.538187	no	0.549155	9371
XLOC_000750	XLOC_000750	Uggt1	chr1:36135138-36244501	chr1	36135138	36244501	d8 Nkx2-5 EmGFP	CLK	OK	16.0764	23.3423	0.538001	0.465207	0.64525	0.896114	no	7.2659	109363
XLOC_000751	XLOC_000751	Neurl3	chr1:36264601-36273425	chr1	36264601	36273425	d8 Nkx2-5 EmGFP	CLK	OK	1.22888	0.0842025	-3.86733	-1.89673	0.12845	0.482786	no	1.14468	8824
XLOC_000752	XLOC_000752	4632411B12Rik	chr1:36335729-36369181	chr1	36335729	36369181	d8 Nkx2-5 EmGFP	CLK	OK	13.5935	4.74791	-1.51755	-1.14333	0.27075	0.672307	no	8.84559	33452
XLOC_000753	XLOC_000753	Lman2l	chr1:36418802-36445261	chr1	36418802	36445261	d8 Nkx2-5 EmGFP	CLK	OK	16.9568	9.0121	-0.911928	-0.605703	0.54395	0.849302	no	7.9447	26459
XLOC_000754	XLOC_000754	Ankrd23,Ankrd39	chr1:36530194-36547225	chr1	36530194	36547225	d8 Nkx2-5 EmGFP	CLK	OK	3.85384	2.41843	-0.672227	-0.354528	0.72275	0.927555	no	1.43541	17031
XLOC_000755	XLOC_000755	Sema4c	chr1:36548641-36558381	chr1	36548641	36558381	d8 Nkx2-5 EmGFP	CLK	OK	22.5533	3.02637	-2.89768	-2.02759	0.06525	0.319469	no	19.5269	9740
XLOC_000756	XLOC_000756	Fam178b	chr1:36561798-36683574	chr1	36561798	36683574	d8 Nkx2-5 EmGFP	CLK	OK	0.906667	3.97271	2.13148	1.14437	0.3017	0.698659	no	3.06604	121776
XLOC_000757	XLOC_000757	Actr1b	chr1:36698111-36710045	chr1	36698111	36710045	d8 Nkx2-5 EmGFP	CLK	OK	56.3913	60.0281	0.0901657	0.0753496	0.9411	0.984459	no	3.6368	11934
XLOC_000758	XLOC_000758	Tmem131	chr1:36792188-36939823	chr1	36792188	36939823	d8 Nkx2-5 EmGFP	CLK	OK	19.2393	51.1599	1.41096	1.22451	0.24085	0.650343	no	31.9206	147635
XLOC_000759	XLOC_000759	6330578E17Rik	chr1:37417084-37430103	chr1	37417084	37430103	d8 Nkx2-5 EmGFP	CLK	OK	25.564	32.5036	0.346486	0.364089	0.7747	0.944097	no	6.9396	13019
XLOC_000760	XLOC_000760	Mgat4a	chr1:37439339-37541025	chr1	37439339	37541025	d8 Nkx2-5 EmGFP	CLK	OK	0.566893	0.847429	0.580017	0.333153	0.77315	0.943854	no	0.280536	101686
XLOC_000761	XLOC_000761	4930594C11Rik	chr1:37439339-37541025	chr1	37439339	37541025	d8 Nkx2-5 EmGFP	CLK	NOTEST	0	0.0107571	inf	0	1	1	no	0.0107571	101686
XLOC_000762	XLOC_000762	2010300C02Rik	chr1:37611675-37720207	chr1	37611675	37720207	d8 Nkx2-5 EmGFP	CLK	OK	0.264135	0.30715	0.21767	0.0908488	0.92015	0.979662	no	0.043015	108532
XLOC_000763	XLOC_000763	Tsga10	chr1:37754775-37865201	chr1	37754775	37865201	d8 Nkx2-5 EmGFP	CLK	OK	1.51131	0.324399	-2.21996	-1.11034	0.31785	0.711992	no	1.18691	110426
XLOC_000764	XLOC_000764	Mitd1	chr1:37871629-37898333	chr1	37871629	37898333	d8 Nkx2-5 EmGFP	CLK	OK	5.12889	8.94052	0.801713	0.265149	0.85955	0.965014	no	3.81163	26704
XLOC_000765	XLOC_000765	Lyg2	chr1:37905922-37916493	chr1	37905922	37916493	d8 Nkx2-5 EmGFP	CLK	NOTEST	0	0	0	0	1	1	no	0	10571
XLOC_000766	XLOC_000766	Lyg1	chr1:37946737-37957759	chr1	37946737	37957759	d8 Nkx2-5 EmGFP	CLK	NOTEST	0	0.0183752	inf	0	1	1	no	0.0183752	11022
XLOC_000767	XLOC_000767	Txndc9	chr1:37983382-37997586	chr1	37983382	37997586	d8 Nkx2-5 EmGFP	CLK	OK	5.22219	19.7343	1.91798	1.41096	0.1728	0.565642	no	14.5121	14204
XLOC_000768	XLOC_000768	Rev1	chr1:37998009-38129662	chr1	37998009	38129662	d8 Nkx2-5 EmGFP	CLK	OK	5.90895	7.68086	0.378365	0.130437	0.91325	0.978117	no	1.77191	131653
XLOC_000769	XLOC_000769	Aff3	chr1:38177074-38664955	chr1	38177074	38664955	d8 Nkx2-5 EmGFP	CLK	OK	4.21893	5.68334	0.42986	0.319135	0.75575	0.938581	no	1.46441	487881
XLOC_000770	XLOC_000770	Lonrf2	chr1:38793719-38835916	chr1	38793719	38835916	d8 Nkx2-5 EmGFP	CLK	OK	0.209784	0.197616	-0.0862076	-0.0423582	0.969	0.990331	no	0.012168	42197
XLOC_000771	XLOC_000771	Chst10	chr1:38863866-38898160	chr1	38863866	38898160	d8 Nkx2-5 EmGFP	CLK	OK	1.23641	3.53949	1.51738	0.853504	0.42465	0.780047	no	2.30308	34294
XLOC_000772	XLOC_000772	Tbc1d8	chr1:39367850-39478747	chr1	39367850	39478747	d8 Nkx2-5 EmGFP	CLK	OK	1.58232	2.75237	0.79864	0.15047	0.75865	0.939627	no	1.17005	110897
XLOC_000773	XLOC_000773	-	chr1:39533007-39535321	chr1	39533007	39535321	d8 Nkx2-5 EmGFP	CLK	OK	0.308311	0.0565566	-2.44662	-1.64485	0.42565	0.780607	no	0.251754	2314
XLOC_000774	XLOC_000774	Rnf149	chr1:39547620-39577411	chr1	39547620	39577411	d8 Nkx2-5 EmGFP	CLK	OK	14.8539	14.5362	-0.0311915	-0.0229756	0.97985	0.992918	no	0.3177	29791
XLOC_000775	XLOC_000775	Creg2	chr1:39618405-39651182	chr1	39618405	39651182	d8 Nkx2-5 EmGFP	CLK	OK	0.543952	0.0872304	-2.64058	-1.42061	0.2701	0.672069	no	0.456722	32777
XLOC_000776	XLOC_000776	Rfx8	chr1:39655255-39720989	chr1	39655255	39720989	d8 Nkx2-5 EmGFP	CLK	OK	0.324111	0.0169378	-4.25817	-0.52578	0.2253	0.635289	no	0.307173	65734
XLOC_000777	XLOC_000777	Gm3646	chr1:39804140-39805332	chr1	39804140	39805332	d8 Nkx2-5 EmGFP	CLK	NOTEST	0	0	0	0	1	1	no	0	1192
XLOC_000778	XLOC_000778	1700066B17Rik	chr1:39842427-39847330	chr1	39842427	39847330	d8 Nkx2-5 EmGFP	CLK	NOTEST	0	0	0	0	1	1	no	0	4903
XLOC_000779	XLOC_000779	Gm16894	chr1:40076211-40125226	chr1	40076211	40125226	d8 Nkx2-5 EmGFP	CLK	NOTEST	0.023497	0	#NAME?	0	1	1	no	0.023497	49015
XLOC_000780	XLOC_000780	Mfsd9	chr1:40772039-40790668	chr1	40772039	40790668	d8 Nkx2-5 EmGFP	CLK	OK	1.08793	1.04751	-0.054626	-0.028033	0.9784	0.992743	no	0.04042	18629
XLOC_000781	XLOC_000781	4930448I06Rik	chr1:41167559-41181252	chr1	41167559	41181252	d8 Nkx2-5 EmGFP	CLK	NOTEST	0	0	0	0	1	1	no	0	13693
XLOC_000782	XLOC_000782	2610017I09Rik	chr1:42648199-42694825	chr1	42648199	42694825	d8 Nkx2-5 EmGFP	CLK	OK	0.186918	0.0188898	-3.30672	-1.81033	0.40365	0.767418	no	0.168028	46626
XLOC_000783	XLOC_000783	Tgfbrap1	chr1:43047268-43098622	chr1	43047268	43098622	d8 Nkx2-5 EmGFP	CLK	OK	3.26318	2.84402	-0.198345	-0.13485	0.8977	0.974614	no	0.41916	51354
XLOC_000784	XLOC_000784	Fhl2	chr1:43123073-43163961	chr1	43123073	43163961	d8 Nkx2-5 EmGFP	CLK	OK	3.85097	1.48691	-1.3729	-0.835004	0.52085	0.837037	no	2.36406	40888
XLOC_000785	XLOC_000785	Uxs1	chr1:43749840-43827777	chr1	43749840	43827777	d8 Nkx2-5 EmGFP	CLK	OK	5.58922	7.53963	0.431847	0.261551	0.79735	0.949686	no	1.95041	77937
XLOC_000786	XLOC_000786	-	chr1:43932261-44003179	chr1	43932261	44003179	d8 Nkx2-5 EmGFP	CLK	OK	0.30347	0.252516	-0.265179	-0.00754183	0.0421	0.258653	no	0.050954	70918
XLOC_000787	XLOC_000787	-	chr1:44003316-44004379	chr1	44003316	44004379	d8 Nkx2-5 EmGFP	CLK	OK	0	0.126102	inf	#NAME?	0.04125	0.255134	no	0.126102	1063
XLOC_000788	XLOC_000788	A530098C11Rik	chr1:44009407-44020006	chr1	44009407	44020006	d8 Nkx2-5 EmGFP	CLK	NOTEST	0	0.00766407	inf	0	1	1	no	0.00766407	10599
XLOC_000789	XLOC_000789	1700029F09Rik	chr1:44086616-44102472	chr1	44086616	44102472	d8 Nkx2-5 EmGFP	CLK	OK	11.2925	12.488	0.145176	0.0934065	0.9301	0.982607	no	1.1955	15856
XLOC_000790	XLOC_000790	Kdelc1	chr1:44106545-44118773	chr1	44106545	44118773	d8 Nkx2-5 EmGFP	CLK	OK	14.9619	10.5041	-0.510345	-0.42993	0.71615	0.924942	no	4.4578	12228
XLOC_000791	XLOC_000791	4832428D23Rik	chr1:44204069-44218931	chr1	44204069	44218931	d8 Nkx2-5 EmGFP	CLK	NOTEST	0	0.00733673	inf	0	1	1	no	0.00733673	14862
XLOC_000792	XLOC_000792	4930521E06Rik	chr1:44551670-44796836	chr1	44551670	44796836	d8 Nkx2-5 EmGFP	CLK	NOTEST	0.0127256	0	#NAME?	0	1	1	no	0.0127256	245166
XLOC_000793	XLOC_000793	Col5a2	chr1:45374330-45503282	chr1	45374330	45503282	d8 Nkx2-5 EmGFP	CLK	OK	27.9242	0.733339	-5.25089	-3.33788	0.01245	0.183938	no	27.1909	128952
XLOC_000794	XLOC_000794	Slc40a1	chr1:45908069-45925594	chr1	45908069	45925594	d8 Nkx2-5 EmGFP	CLK	OK	13.024	5.90335	-1.14157	-1.01111	0.43855	0.787473	no	7.12065	17525
XLOC_000795	XLOC_000795	Gm3852	chr1:46011546-46012263	chr1	46011546	46012263	d8 Nkx2-5 EmGFP	CLK	NOTEST	0	0	0	0	1	1	no	0	717
XLOC_000796	XLOC_000796	Gm4776	chr1:46020414-46030437	chr1	46020414	46030437	d8 Nkx2-5 EmGFP	CLK	NOTEST	0	0	0	0	1	1	no	0	10023
XLOC_000797	XLOC_000797	Slc39a10	chr1:46807543-46888497	chr1	46807543	46888497	d8 Nkx2-5 EmGFP	CLK	OK	19.3769	26.653	0.459956	0.382797	0.7076	0.921357	no	7.2761	80954
XLOC_000798	XLOC_000798	-	chr1:46892064-46894197	chr1	46892064	46894197	d8 Nkx2-5 EmGFP	CLK	OK	0	0.176028	inf	#NAME?	0.018	0.214311	no	0.176028	2133
XLOC_000799	XLOC_000799	9330175M20Rik	chr1:51218385-51333779	chr1	51218385	51333779	d8 Nkx2-5 EmGFP	CLK	NOTEST	0	0	0	0	1	1	no	0	115394
XLOC_000800	XLOC_000800	Obfc2a	chr1:51464899-51478399	chr1	51464899	51478399	d8 Nkx2-5 EmGFP	CLK	OK	11.1768	9.63526	-0.214118	-0.152474	0.8872	0.972214	no	1.54154	13500
XLOC_000801	XLOC_000801	Myo1b	chr1:51749762-51915974	chr1	51749762	51915974	d8 Nkx2-5 EmGFP	CLK	OK	20.3434	8.27097	-1.29843	-1.03982	0.31065	0.705984	no	12.0724	166212
XLOC_000802	XLOC_000802	Gls	chr1:52163445-52233232	chr1	52163445	52233232	d8 Nkx2-5 EmGFP	CLK	OK	16.0229	8.17778	-0.970354	-0.728784	0.4848	0.816819	no	7.84512	69787
XLOC_000803	XLOC_000803	Nab1	chr1:52455848-52500448	chr1	52455848	52500448	d8 Nkx2-5 EmGFP	CLK	OK	4.88317	2.233	-1.12883	-0.857966	0.4799	0.813787	no	2.65017	44600
XLOC_000804	XLOC_000804	Mfsd6	chr1:52656304-52734283	chr1	52656304	52734283	d8 Nkx2-5 EmGFP	CLK	OK	0.440126	0.626903	0.510325	0.257021	0.8128	0.953332	no	0.186777	77979
XLOC_000805	XLOC_000805	Inpp1	chr1:52788957-52817744	chr1	52788957	52817744	d8 Nkx2-5 EmGFP	CLK	OK	3.30544	2.43857	-0.438809	-0.240991	0.8199	0.955438	no	0.86687	28787
XLOC_000806	XLOC_000806	1700019D03Rik	chr1:52922360-52953635	chr1	52922360	52953635	d8 Nkx2-5 EmGFP	CLK	OK	1.08586	17.7356	4.02974	1.87234	0.06455	0.3174	no	16.6497	31275
XLOC_000807	XLOC_000807	1700019A02Rik,Pms1	chr1:53158576-53297025	chr1	53158576	53297025	d8 Nkx2-5 EmGFP	CLK	OK	2.67556	3.37872	0.336635	0.194162	0.85105	0.96324	no	0.70316	138449
XLOC_000808	XLOC_000808	Asnsd1	chr1:53344643-53352699	chr1	53344643	53352699	d8 Nkx2-5 EmGFP	CLK	OK	29.5498	45.057	0.608602	0.598021	0.6304	0.889632	no	15.5072	8056
XLOC_000809	XLOC_000809	Dnahc7a	chr1:53397001-53751416	chr1	53397001	53751416	d8 Nkx2-5 EmGFP	CLK	OK	0.518968	0.465416	-0.157125	-0.0715872	0.948	0.986224	no	0.053552	354415
XLOC_000810	XLOC_000810	Stk17b	chr1:53755511-53785215	chr1	53755511	53785215	d8 Nkx2-5 EmGFP	CLK	OK	5.46665	7.50709	0.457595	0.396076	0.7666	0.942041	no	2.04044	29704
XLOC_000811	XLOC_000811	Hecw2	chr1:53806873-54195034	chr1	53806873	54195034	d8 Nkx2-5 EmGFP	CLK	OK	1.10138	1.39341	0.339305	0.130576	0.86375	0.966518	no	0.29203	388161
XLOC_000812	XLOC_000812	Gtf3c3	chr1:54396097-54439100	chr1	54396097	54439100	d8 Nkx2-5 EmGFP	CLK	OK	9.83366	17.6535	0.84415	0.636492	0.5299	0.84179	no	7.81984	43003
XLOC_000813	XLOC_000813	Pgap1	chr1:54472999-54557684	chr1	54472999	54557684	d8 Nkx2-5 EmGFP	CLK	OK	2.0719	6.08003	1.55313	1.51412	0.2888	0.68775	no	4.00813	84685
XLOC_000814	XLOC_000814	Ankrd44	chr1:54645339-54926387	chr1	54645339	54926387	d8 Nkx2-5 EmGFP	CLK	OK	4.44444	0.22299	-4.31695	-2.51285	0.04435	0.265051	no	4.22145	281048
XLOC_000815	XLOC_000815	Sf3b1	chr1:54985169-55027478	chr1	54985169	55027478	d8 Nkx2-5 EmGFP	CLK	OK	51.7503	75.295	0.540986	0.563186	0.6409	0.894251	no	23.5447	42309
XLOC_000816	XLOC_000816	Hspd1	chr1:55077736-55087932	chr1	55077736	55087932	d8 Nkx2-5 EmGFP	CLK	OK	51.5437	615.556	3.57802	3.03519	0.0066	0.13366	no	564.012	10196
XLOC_000817	XLOC_000817	Rftn2	chr1:55170159-55244240	chr1	55170159	55244240	d8 Nkx2-5 EmGFP	CLK	OK	0.880041	0.106513	-3.04654	-0.421612	0.4114	0.772009	no	0.773528	74081
XLOC_000818	XLOC_000818	Boll	chr1:55248000-55363480	chr1	55248000	55363480	d8 Nkx2-5 EmGFP	CLK	OK	0.0401416	1.32605	5.04589	2.0034	0.11465	0.45611	no	1.28591	115480
XLOC_000819	XLOC_000819	Hsfy2	chr1:56636050-56637451	chr1	56636050	56637451	d8 Nkx2-5 EmGFP	CLK	NOTEST	0	0	0	0	1	1	no	0	1401
XLOC_000820	XLOC_000820	Satb2	chr1:56793980-56980414	chr1	56793980	56980414	d8 Nkx2-5 EmGFP	CLK	OK	0.445315	0.35011	-0.347019	-0.183055	0.88505	0.971752	no	0.095205	186434
XLOC_000821	XLOC_000821	BC055402	chr1:57200644-57214996	chr1	57200644	57214996	d8 Nkx2-5 EmGFP	CLK	NOTEST	0	0	0	0	1	1	no	0	14352
XLOC_000822	XLOC_000822	4930558J18Rik	chr1:57349902-57377551	chr1	57349902	57377551	d8 Nkx2-5 EmGFP	CLK	OK	0.383387	0.500727	0.385224	0.143015	0.87895	0.970673	no	0.11734	27649
XLOC_000823	XLOC_000823	1110034B05Rik	chr1:57388243-57415958	chr1	57388243	57415958	d8 Nkx2-5 EmGFP	CLK	OK	4.55039	3.60116	-0.33753	-0.126176	0.926	0.981662	no	0.94923	27715
XLOC_000824	XLOC_000824	Kctd18	chr1:57955100-57970084	chr1	57955100	57970084	d8 Nkx2-5 EmGFP	CLK	OK	3.90674	1.5133	-1.36827	-0.757492	0.46465	0.804292	no	2.39344	14984
XLOC_000825	XLOC_000825	Clk1	chr1:58411987-58424088	chr1	58411987	58424088	d8 Nkx2-5 EmGFP	CLK	OK	24.1998	15.8226	-0.613006	-0.44501	0.6692	0.905544	no	8.3772	12101
XLOC_000826	XLOC_000826	Ppil3	chr1:58430992-58505102	chr1	58430992	58505102	d8 Nkx2-5 EmGFP	CLK	OK	9.79787	24.4	1.31634	0.470724	0.75345	0.937515	no	14.6021	74110
XLOC_000827	XLOC_000827	Orc2	chr1:58430992-58505102	chr1	58430992	58505102	d8 Nkx2-5 EmGFP	CLK	OK	9.77294	30.6647	1.64972	0.847158	0.4111	0.771804	no	20.8918	74110
XLOC_000828	XLOC_000828	Fam126b	chr1:58522671-58595948	chr1	58522671	58595948	d8 Nkx2-5 EmGFP	CLK	OK	1.06335	1.34841	0.342649	0.153133	0.91575	0.978943	no	0.28506	73277
XLOC_000829	XLOC_000829	Als2cr12	chr1:58651881-58695989	chr1	58651881	58695989	d8 Nkx2-5 EmGFP	CLK	NOTEST	0	0.00789853	inf	0	1	1	no	0.00789853	44108
XLOC_000830	XLOC_000830	Casp8	chr1:58795373-58856945	chr1	58795373	58856945	d8 Nkx2-5 EmGFP	CLK	NOTEST	0	0	0	0	1	1	no	0	61572
XLOC_000831	XLOC_000831	Trak2	chr1:58900315-58973482	chr1	58900315	58973482	d8 Nkx2-5 EmGFP	CLK	OK	5.63508	3.96715	-0.506331	-0.370644	0.718	0.925779	no	1.66793	73167
XLOC_000832	XLOC_000832	Als2cr11	chr1:59050505-59094900	chr1	59050505	59094900	d8 Nkx2-5 EmGFP	CLK	NOTEST	0	0.0104302	inf	0	1	1	no	0.0104302	44395
XLOC_000833	XLOC_000833	Als2cr4	chr1:59100586-59120096	chr1	59100586	59120096	d8 Nkx2-5 EmGFP	CLK	OK	10.5393	10.5589	0.0026805	0.00178172	0.9983	0.999091	no	0.0196	19510
XLOC_000834	XLOC_000834	Als2,Mpp4	chr1:59120934-59238035	chr1	59120934	59238035	d8 Nkx2-5 EmGFP	CLK	OK	6.28641	13.4494	1.09723	0.836477	0.4051	0.768603	no	7.16299	117101
XLOC_000835	XLOC_000835	Sumo1	chr1:59639433-59671127	chr1	59639433	59671127	d8 Nkx2-5 EmGFP	CLK	OK	39.4369	118.833	1.59131	1.27042	0.2267	0.636418	no	79.3961	31694
XLOC_000836	XLOC_000836	Ica1l	chr1:59989067-60043087	chr1	59989067	60043087	d8 Nkx2-5 EmGFP	CLK	OK	0.109691	0.0764321	-0.521192	-0.261961	0.83055	0.958131	no	0.0332589	54020
XLOC_000837	XLOC_000837	Wdr12	chr1:60074704-60151034	chr1	60074704	60151034	d8 Nkx2-5 EmGFP	CLK	OK	4.22302	55.9395	3.72752	2.90312	0.0285	0.249213	no	51.7165	76330
XLOC_000838	XLOC_000838	Raph1	chr1:60409575-60566765	chr1	60409575	60566765	d8 Nkx2-5 EmGFP	CLK	OK	14.184	10.6937	-0.407505	-0.217278	0.81415	0.9538	no	3.4903	157190
XLOC_000839	XLOC_000839	4930487H11Rik	chr1:62703268-62818692	chr1	62703268	62818692	d8 Nkx2-5 EmGFP	CLK	OK	0.10372	0.0622262	-0.737095	-0.00935432	0.0236	0.238968	no	0.0414938	115424
XLOC_000840	XLOC_000840	Ino80d	chr1:63047799-63114267	chr1	63047799	63114267	d8 Nkx2-5 EmGFP	CLK	OK	2.58644	3.76535	0.541816	0.405652	0.69095	0.913818	no	1.17891	66468
XLOC_000841	XLOC_000841	Ndufs1	chr1:63114405-63176822	chr1	63114405	63176822	d8 Nkx2-5 EmGFP	CLK	OK	24.3535	49.4268	1.02116	0.820476	0.412	0.772009	no	25.0733	62417
XLOC_000842	XLOC_000842	Gpr1	chr1:63182603-63214209	chr1	63182603	63214209	d8 Nkx2-5 EmGFP	CLK	OK	0.462386	0.735269	0.669175	0.325478	0.76875	0.94259	no	0.272883	31606
XLOC_000843	XLOC_000843	Dytn	chr1:63622850-63686927	chr1	63622850	63686927	d8 Nkx2-5 EmGFP	CLK	NOTEST	0	0	0	0	1	1	no	0	64077
XLOC_000844	XLOC_000844	Mdh1b	chr1:63698826-63730318	chr1	63698826	63730318	d8 Nkx2-5 EmGFP	CLK	NOTEST	0.0409846	0.0797628	0.960635	0	1	1	no	0.0387782	31492
XLOC_000845	XLOC_000845	4933402D24Rik	chr1:63730428-63769267	chr1	63730428	63769267	d8 Nkx2-5 EmGFP	CLK	NOTEST	0.0498671	0.0429241	-0.216303	0	1	1	no	0.006943	38839
XLOC_000846	XLOC_000846	Mir1958	chr1:63980972-63984483	chr1	63980972	63984483	d8 Nkx2-5 EmGFP	CLK	NOTEST	0	0	0	0	1	1	no	0	3511
XLOC_000847	XLOC_000847	Klf7	chr1:64029456-64121491	chr1	64029456	64121491	d8 Nkx2-5 EmGFP	CLK	OK	3.67899	4.46088	0.278019	0.160529	0.85375	0.963864	no	0.78189	92035
XLOC_000848	XLOC_000848	Mettl21a	chr1:64606479-64617762	chr1	64606479	64617762	d8 Nkx2-5 EmGFP	CLK	OK	5.54015	3.5518	-0.641374	-0.388956	0.7133	0.923943	no	1.98835	11283
XLOC_000849	XLOC_000849	-	chr1:64618427-64619629	chr1	64618427	64619629	d8 Nkx2-5 EmGFP	CLK	NOTEST	0.0431829	0.0344735	-0.324974	0	1	1	no	0.0087094	1202
XLOC_000850	XLOC_000850	2810408I11Rik	chr1:64679868-64690659	chr1	64679868	64690659	d8 Nkx2-5 EmGFP	CLK	OK	3.93895	9.58094	1.28236	0.935816	0.5405	0.84757	no	5.64199	10791
XLOC_000851	XLOC_000851	Fzd5	chr1:64730557-64737750	chr1	64730557	64737750	d8 Nkx2-5 EmGFP	CLK	OK	1.06746	12.9737	3.60335	2.39719	0.0445	0.265051	no	11.9062	7193
XLOC_000852	XLOC_000852	Plekhm3	chr1:64788967-64956824	chr1	64788967	64956824	d8 Nkx2-5 EmGFP	CLK	OK	1.99832	1.7037	-0.230117	-0.153181	0.88195	0.971187	no	0.29462	167857
XLOC_000853	XLOC_000853	-	chr1:64993894-64994636	chr1	64993894	64994636	d8 Nkx2-5 EmGFP	CLK	OK	1238.85	0.339509	-11.8333	-7.98335	0.0435	0.263411	no	1238.51	742
XLOC_000854	XLOC_000854	Akr1cl	chr1:65013085-65032748	chr1	65013085	65032748	d8 Nkx2-5 EmGFP	CLK	NOTEST	0.0275193	0.0596333	1.11567	0	1	1	no	0.032114	19663
XLOC_000855	XLOC_000855	Cryge	chr1:65048556-65051163	chr1	65048556	65051163	d8 Nkx2-5 EmGFP	CLK	OK	0.0726952	0.299919	2.04464	1.25929	0.4652	0.804612	no	0.227224	2607
XLOC_000856	XLOC_000856	Crygd	chr1:65061837-65063440	chr1	65061837	65063440	d8 Nkx2-5 EmGFP	CLK	OK	0	0.14771	inf	#NAME?	0.0549	0.28546	no	0.14771	1603
XLOC_000857	XLOC_000857	Crygc	chr1:65071530-65073521	chr1	65071530	65073521	d8 Nkx2-5 EmGFP	CLK	OK	0	0.141875	inf	#NAME?	0.0595	0.300513	no	0.141875	1991
XLOC_000858	XLOC_000858	Crygb	chr1:65080226-65082267	chr1	65080226	65082267	d8 Nkx2-5 EmGFP	CLK	NOTEST	0.0374558	0.0588405	0.65162	0	1	1	no	0.0213847	2041
XLOC_000859	XLOC_000859	Cryga	chr1:65100388-65103363	chr1	65100388	65103363	d8 Nkx2-5 EmGFP	CLK	OK	0.02181	0.50432	4.53128	3.03519	0.3237	0.71571	no	0.48251	2975
XLOC_000860	XLOC_000860	D630023F18Rik	chr1:65105307-65123193	chr1	65105307	65123193	d8 Nkx2-5 EmGFP	CLK	OK	0.206317	3.47595	4.07447	1.84112	0.09905	0.417933	no	3.26963	17886
XLOC_000861	XLOC_000861	Idh1	chr1:65158615-65186503	chr1	65158615	65186503	d8 Nkx2-5 EmGFP	CLK	OK	48.1644	21.7529	-1.14676	-0.788835	0.3934	0.759723	no	26.4115	27888
XLOC_000862	XLOC_000862	1110028C15Rik	chr1:66700892-66817595	chr1	66700892	66817595	d8 Nkx2-5 EmGFP	CLK	OK	1.70844	0.942204	-0.858572	-0.288367	0.78095	0.945595	no	0.766236	116703
XLOC_000863	XLOC_000863	Acadl	chr1:66830852-66863267	chr1	66830852	66863267	d8 Nkx2-5 EmGFP	CLK	OK	19.2112	28.8136	0.584802	0.508161	0.66735	0.904959	no	9.6024	32415
XLOC_000864	XLOC_000864	Myl1	chr1:66924295-66945056	chr1	66924295	66945056	d8 Nkx2-5 EmGFP	CLK	OK	0.29156	0.0287407	-3.34263	-1.40132	0.25395	0.658801	no	0.262819	20761
XLOC_000865	XLOC_000865	Lancl1	chr1:67000516-67038881	chr1	67000516	67038881	d8 Nkx2-5 EmGFP	CLK	OK	14.4251	12.999	-0.150176	-0.117305	0.90705	0.977033	no	1.4261	38365
XLOC_000866	XLOC_000866	Erbb4	chr1:68038712-69108516	chr1	68038712	69108516	d8 Nkx2-5 EmGFP	CLK	OK	0.426642	0.012731	-5.06661	-2.3434	0.08655	0.38482	no	0.413911	1069804
XLOC_000867	XLOC_000867	Ikzf2	chr1:69531095-69687216	chr1	69531095	69687216	d8 Nkx2-5 EmGFP	CLK	OK	0.801075	0.114645	-2.80477	-1.45475	0.19985	0.605482	no	0.68643	156121
XLOC_000868	XLOC_000868	Bard1	chr1:71027534-71102972	chr1	71027534	71102972	d8 Nkx2-5 EmGFP	CLK	OK	4.00957	4.98953	0.315458	0.270438	0.8337	0.958798	no	0.97996	75438
XLOC_000869	XLOC_000869	Abca12	chr1:71243089-71414910	chr1	71243089	71414910	d8 Nkx2-5 EmGFP	CLK	NOTEST	0.00207029	0.0113931	2.46026	0	1	1	no	0.00932281	171821
XLOC_000870	XLOC_000870	Fn1	chr1:71585484-71653300	chr1	71585484	71653300	d8 Nkx2-5 EmGFP	CLK	OK	590.788	163.578	-1.85266	-1.46299	0.16245	0.549594	no	427.21	67816
XLOC_000871	XLOC_000871	4933417E11Rik	chr1:71958997-72005195	chr1	71958997	72005195	d8 Nkx2-5 EmGFP	CLK	NOTEST	0.0168585	0.00664151	-1.34389	0	1	1	no	0.010217	46198
XLOC_000872	XLOC_000872	Mreg	chr1:72159232-72212307	chr1	72159232	72212307	d8 Nkx2-5 EmGFP	CLK	OK	3.02361	24.5277	3.02006	2.42885	0.0902	0.395252	no	21.5041	53075
XLOC_000873	XLOC_000873	Pecr	chr1:72259172-72284336	chr1	72259172	72284336	d8 Nkx2-5 EmGFP	CLK	OK	11.2123	14.4819	0.369174	0.236593	0.8208	0.955764	no	3.2696	25164
XLOC_000874	XLOC_000874	2013-03-04	chr1:72427111-72536564	chr1	72427111	72536564	d8 Nkx2-5 EmGFP	CLK	NOTEST	0.0216992	0.0155001	-0.485368	0	1	1	no	0.0061991	109453
XLOC_000875	XLOC_000875	Ankar	chr1:72642979-72700564	chr1	72642979	72700564	d8 Nkx2-5 EmGFP	CLK	NOTEST	0.00199303	0.00312923	0.650844	0	1	1	no	0.0011362	57585
XLOC_000876	XLOC_000876	Igfbp5	chr1:72858064-72874865	chr1	72858064	72874865	d8 Nkx2-5 EmGFP	CLK	OK	136.731	0.357175	-8.5805	-5.36827	0.00385	0.100663	no	136.374	16801
XLOC_000877	XLOC_000877	Tnp1	chr1:73015074-73015899	chr1	73015074	73015899	d8 Nkx2-5 EmGFP	CLK	NOTEST	0	0	0	0	1	1	no	0	825
XLOC_000878	XLOC_000878	Pinc	chr1:73391384-73430779	chr1	73391384	73430779	d8 Nkx2-5 EmGFP	CLK	NOTEST	0	0	0	0	1	1	no	0	39395
XLOC_000879	XLOC_000879	6030407O03Rik	chr1:73618380-73864466	chr1	73618380	73864466	d8 Nkx2-5 EmGFP	CLK	NOTEST	0.0136474	0.0107971	-0.337992	0	1	1	no	0.0028503	246086
XLOC_000880	XLOC_000880	Tns1	chr1:73910187-74124447	chr1	73910187	74124447	d8 Nkx2-5 EmGFP	CLK	OK	18.7074	2.32207	-3.01012	-2.3524	0.03795	0.255134	no	16.3853	214260
XLOC_000881	XLOC_000881	Cxcr1	chr1:74191785-74194631	chr1	74191785	74194631	d8 Nkx2-5 EmGFP	CLK	NOTEST	0	0.056263	inf	0	1	1	no	0.056263	2846
XLOC_000882	XLOC_000882	Aamp	chr1:74279839-74284738	chr1	74279839	74284738	d8 Nkx2-5 EmGFP	CLK	OK	142.989	105.667	-0.43638	-0.381564	0.7084	0.921745	no	37.322	4899
XLOC_000883	XLOC_000883	Tmbim1	chr1:74285033-74353692	chr1	74285033	74353692	d8 Nkx2-5 EmGFP	CLK	OK	26.6894	11.7052	-1.18912	-0.722161	0.5334	0.843834	no	14.9842	68659
XLOC_000884	XLOC_000884	Usp37	chr1:74409249-74593723	chr1	74409249	74593723	d8 Nkx2-5 EmGFP	CLK	OK	4.95308	4.60975	-0.103637	-0.0373672	0.9774	0.992359	no	0.34333	184474
XLOC_000885	XLOC_000885	Zfp142	chr1:74409249-74593723	chr1	74409249	74593723	d8 Nkx2-5 EmGFP	CLK	OK	3.34436	6.8527	1.03494	0.358404	0.75995	0.940051	no	3.50834	184474
XLOC_000886	XLOC_000886	Rnf25	chr1:74593751-74636982	chr1	74593751	74636982	d8 Nkx2-5 EmGFP	CLK	OK	18.423	13.9373	-0.402552	-0.249345	0.81615	0.954473	no	4.4857	43231
XLOC_000887	XLOC_000887	Prkag3	chr1:74738921-74749447	chr1	74738921	74749447	d8 Nkx2-5 EmGFP	CLK	NOTEST	0.00853242	0.0487898	2.51555	0	1	1	no	0.0402574	10526
XLOC_000888	XLOC_000888	Fev	chr1:74881508-74885408	chr1	74881508	74885408	d8 Nkx2-5 EmGFP	CLK	OK	0.341264	0.0221881	-3.94303	-2.21008	0.2679	0.670336	no	0.319076	3900
XLOC_000889	XLOC_000889	Cryba2	chr1:74889943-74893135	chr1	74889943	74893135	d8 Nkx2-5 EmGFP	CLK	NOTEST	0	0.0227546	inf	0	1	1	no	0.0227546	3192
XLOC_000890	XLOC_000890	Mir375	chr1:74900657-74900721	chr1	74900657	74900721	d8 Nkx2-5 EmGFP	CLK	NOTEST	0	0	0	0	1	1	no	0	64
XLOC_000891	XLOC_000891	Ccdc108	chr1:74902079-74935599	chr1	74902079	74935599	d8 Nkx2-5 EmGFP	CLK	NOTEST	0	0.00734854	inf	0	1	1	no	0.00734854	33520
XLOC_000892	XLOC_000892	Ihh	chr1:74945317-74951651	chr1	74945317	74951651	d8 Nkx2-5 EmGFP	CLK	OK	2.3045	0.132215	-4.1235	-2.268	0.09985	0.419644	no	2.17229	6334
XLOC_000893	XLOC_000893	Nhej1	chr1:74967345-75125244	chr1	74967345	75125244	d8 Nkx2-5 EmGFP	CLK	OK	4.89056	9.44269	0.949198	0.517421	0.6184	0.88469	no	4.55213	157899
XLOC_000894	XLOC_000894	Slc23a3	chr1:75125541-75134505	chr1	75125541	75134505	d8 Nkx2-5 EmGFP	CLK	OK	1.2385	0.054396	-4.50895	-2.13595	0.099	0.417809	no	1.1841	8964
XLOC_000895	XLOC_000895	1810031K17Rik	chr1:75135214-75147909	chr1	75135214	75147909	d8 Nkx2-5 EmGFP	CLK	OK	29.7851	10.773	-1.46718	-0.944809	0.44845	0.793269	no	19.0121	12695
XLOC_000896	XLOC_000896	Abcb6	chr1:75168643-75180283	chr1	75168643	75180283	d8 Nkx2-5 EmGFP	CLK	OK	21.8416	11.0287	-0.985815	-0.670597	0.52285	0.837834	no	10.8129	11640
XLOC_000897	XLOC_000897	Atg9a	chr1:75180863-75210778	chr1	75180863	75210778	d8 Nkx2-5 EmGFP	CLK	OK	17.7595	10.5861	-0.746421	-0.48808	0.6414	0.894492	no	7.1734	29915
XLOC_000898	XLOC_000898	Glb1l	chr1:75180863-75210778	chr1	75180863	75210778	d8 Nkx2-5 EmGFP	CLK	OK	2.28545	0.867695	-1.39722	-0.265759	0.79775	0.949686	no	1.41776	29915
XLOC_000899	XLOC_000899	Tuba4a	chr1:75210828-75219296	chr1	75210828	75219296	d8 Nkx2-5 EmGFP	CLK	OK	7.24589	153.811	4.40785	2.53397	0.0426	0.260038	no	146.565	8468
XLOC_000900	XLOC_000900	A630095N17Rik	chr1:75220094-75232093	chr1	75220094	75232093	d8 Nkx2-5 EmGFP	CLK	OK	0	0.218687	inf	#NAME?	0.03585	0.255134	no	0.218687	11999
XLOC_000901	XLOC_000901	Ptprn	chr1:75247040-75264208	chr1	75247040	75264208	d8 Nkx2-5 EmGFP	CLK	OK	1.2108	6.68702	2.46541	1.49996	0.17375	0.566854	no	5.47622	17168
XLOC_000902	XLOC_000902	Resp18	chr1:75272201-75278380	chr1	75272201	75278380	d8 Nkx2-5 EmGFP	CLK	NOTEST	0	0.0444626	inf	0	1	1	no	0.0444626	6179
XLOC_000903	XLOC_000903	Dnpep	chr1:75308564-75317637	chr1	75308564	75317637	d8 Nkx2-5 EmGFP	CLK	OK	113.817	44.4903	-1.35516	-1.13665	0.27515	0.675897	no	69.3267	9073
XLOC_000904	XLOC_000904	Gm15179	chr1:75368209-75375015	chr1	75368209	75375015	d8 Nkx2-5 EmGFP	CLK	NOTEST	0.0656808	0.0259482	-1.33984	0	1	1	no	0.0397326	6806
XLOC_000905	XLOC_000905	Chpf	chr1:75474568-75479471	chr1	75474568	75479471	d8 Nkx2-5 EmGFP	CLK	OK	32.7484	22.2806	-0.55564	-0.456333	0.659	0.90129	no	10.4678	4903
XLOC_000906	XLOC_000906	Obsl1	chr1:75485824-75510354	chr1	75485824	75510354	d8 Nkx2-5 EmGFP	CLK	OK	50.2902	23.168	-1.11815	-0.910381	0.34635	0.732266	no	27.1222	24530
XLOC_000907	XLOC_000907	Epha4	chr1:77367097-77515088	chr1	77367097	77515088	d8 Nkx2-5 EmGFP	CLK	OK	10.8321	8.38678	-0.369122	-0.290754	0.77945	0.945595	no	2.44532	147991
XLOC_000908	XLOC_000908	Pax3	chr1:78101266-78197136	chr1	78101266	78197136	d8 Nkx2-5 EmGFP	CLK	OK	0.208745	0.0370137	-2.49561	-1.16831	0.32615	0.717594	no	0.171731	95870
XLOC_000909	XLOC_000909	Farsb	chr1:78310345-78489088	chr1	78310345	78489088	d8 Nkx2-5 EmGFP	CLK	OK	29.7238	130.642	2.13593	1.74193	0.0942	0.405511	no	100.918	178743
XLOC_000910	XLOC_000910	-	chr1:78596458-78597391	chr1	78596458	78597391	d8 Nkx2-5 EmGFP	CLK	OK	0.0209546	0.164893	2.97619	1.84115	0.42445	0.780003	no	0.143938	933
XLOC_000911	XLOC_000911	Scg2	chr1:79434668-79440090	chr1	79434668	79440090	d8 Nkx2-5 EmGFP	CLK	NOTEST	0.0253399	0.00243676	-3.37838	0	1	1	no	0.0229031	5422
XLOC_000912	XLOC_000912	Ap1s3	chr1:79606635-79672166	chr1	79606635	79672166	d8 Nkx2-5 EmGFP	CLK	OK	1.00039	5.82253	2.54109	1.39786	0.2041	0.611362	no	4.82214	65531
XLOC_000913	XLOC_000913	Wdfy1	chr1:79702261-79762451	chr1	79702261	79762451	d8 Nkx2-5 EmGFP	CLK	OK	10.0046	12.3054	0.29863	0.195366	0.83065	0.958131	no	2.3008	60190
XLOC_000914	XLOC_000914	Serpine2	chr1:79794320-79858665	chr1	79794320	79858665	d8 Nkx2-5 EmGFP	CLK	OK	35.6574	12.0514	-1.565	-1.28621	0.26165	0.665072	no	23.606	64345
XLOC_000915	XLOC_000915	Fam124b	chr1:80198698-80213944	chr1	80198698	80213944	d8 Nkx2-5 EmGFP	CLK	OK	0.099912	0.00254744	-5.29354	-2.10164	0.29585	0.693937	no	0.0973646	15246
XLOC_000916	XLOC_000916	Cul3	chr1:80265017-80340851	chr1	80265017	80340851	d8 Nkx2-5 EmGFP	CLK	OK	30.3122	39.1183	0.367947	0.300687	0.7677	0.942343	no	8.8061	75834
XLOC_000917	XLOC_000917	Dock10	chr1:80501072-80758553	chr1	80501072	80758553	d8 Nkx2-5 EmGFP	CLK	OK	0.208895	0.038182	-2.45181	-1.1809	0.30495	0.701869	no	0.170713	257481
XLOC_000918	XLOC_000918	Irs1	chr1:82231393-82291655	chr1	82231393	82291655	d8 Nkx2-5 EmGFP	CLK	OK	4.18594	0.611478	-2.77518	-1.76097	0.11285	0.451825	no	3.57446	60262
XLOC_000919	XLOC_000919	Col4a4	chr1:82450722-82586849	chr1	82450722	82586849	d8 Nkx2-5 EmGFP	CLK	NOTEST	0.00560828	0.00728828	0.378019	0	1	1	no	0.00168	136127
XLOC_000920	XLOC_000920	Tm4sf20	chr1:82756648-82768456	chr1	82756648	82768456	d8 Nkx2-5 EmGFP	CLK	NOTEST	0.00698869	0.0055834	-0.323878	0	1	1	no	0.00140529	11808
XLOC_000921	XLOC_000921	Slc19a3	chr1:83012522-83038458	chr1	83012522	83038458	d8 Nkx2-5 EmGFP	CLK	OK	0.825246	0.347178	-1.24915	-0.618165	0.56565	0.860212	no	0.478068	25936
XLOC_000922	XLOC_000922	Sphkap	chr1:83255449-83408293	chr1	83255449	83408293	d8 Nkx2-5 EmGFP	CLK	OK	8.54943	0.039926	-7.74236	-4.45388	0.0294	0.250203	no	8.5095	152844
XLOC_000923	XLOC_000923	Pid1	chr1:84036292-84284645	chr1	84036292	84284645	d8 Nkx2-5 EmGFP	CLK	OK	2.53129	5.65277	1.15909	0.799003	0.51855	0.835848	no	3.12148	248353
XLOC_000924	XLOC_000924	-	chr1:84305697-84309873	chr1	84305697	84309873	d8 Nkx2-5 EmGFP	CLK	OK	0	0.122291	inf	#NAME?	0.04125	0.255134	no	0.122291	4176
XLOC_000925	XLOC_000925	Dner	chr1:84369838-84696221	chr1	84369838	84696221	d8 Nkx2-5 EmGFP	CLK	OK	0.591967	0.487799	-0.279231	-0.137522	0.8965	0.974218	no	0.104168	326383
XLOC_000926	XLOC_000926	Trip12	chr1:84721188-84900486	chr1	84721188	84900486	d8 Nkx2-5 EmGFP	CLK	OK	37.8079	106.606	1.49553	1.40126	0.21315	0.62194	no	68.7981	179298
XLOC_000927	XLOC_000927	Slc16a14	chr1:84904166-84935197	chr1	84904166	84935197	d8 Nkx2-5 EmGFP	CLK	OK	0.161829	0.169736	0.0688226	0.0310809	0.97435	0.991654	no	0.007907	31031
XLOC_000928	XLOC_000928	-	chr1:84990580-84992815	chr1	84990580	84992815	d8 Nkx2-5 EmGFP	CLK	NOTEST	0	0.110874	inf	0	1	1	no	0.110874	2235
XLOC_000929	XLOC_000929	A530032D15Rik	chr1:85088138-85109853	chr1	85088138	85109853	d8 Nkx2-5 EmGFP	CLK	NOTEST	0	0.0114753	inf	0	1	1	no	0.0114753	21715
XLOC_000930	XLOC_000930	C130026I21Rik	chr1:85111359-85275177	chr1	85111359	85275177	d8 Nkx2-5 EmGFP	CLK	OK	0.0449246	0.105497	1.23162	0.376429	0.7123	0.923708	no	0.0605724	163818
XLOC_000931	XLOC_000931	Sp110	chr1:85576898-85645036	chr1	85576898	85645036	d8 Nkx2-5 EmGFP	CLK	OK	0.293887	0.493266	0.747103	0.210671	0.8601	0.965174	no	0.199379	68138
XLOC_000932	XLOC_000932	Sp140	chr1:85576898-85645036	chr1	85576898	85645036	d8 Nkx2-5 EmGFP	CLK	NOTEST	0.0633585	0	#NAME?	0	1	1	no	0.0633585	68138
XLOC_000933	XLOC_000933	A630001G21Rik	chr1:85717082-85736660	chr1	85717082	85736660	d8 Nkx2-5 EmGFP	CLK	OK	0.0671586	0.222515	1.72826	0.810366	0.4689	0.807006	no	0.155356	19578
XLOC_000934	XLOC_000934	Gpr55	chr1:85939536-85961055	chr1	85939536	85961055	d8 Nkx2-5 EmGFP	CLK	NOTEST	0	0.00837565	inf	0	1	1	no	0.00837565	21519
XLOC_000935	XLOC_000935	Htr2b	chr1:86064618-86139295	chr1	86064618	86139295	d8 Nkx2-5 EmGFP	CLK	NOTEST	0.0288921	0.0342487	0.245373	0	1	1	no	0.0053566	74677
XLOC_000936	XLOC_000936	Ncl	chr1:86344718-86359455	chr1	86344718	86359455	d8 Nkx2-5 EmGFP	CLK	OK	91.2481	210.178	1.20375	1.07897	0.3185	0.712422	no	118.93	14737
XLOC_000937	XLOC_000937	Snora75	chr1:86344718-86359455	chr1	86344718	86359455	d8 Nkx2-5 EmGFP	CLK	OK	0	83.7998	inf	#NAME?	5e-05	0.00396813	yes	83.7998	14737
XLOC_000938	XLOC_000938	Snord82	chr1:86344718-86359455	chr1	86344718	86359455	d8 Nkx2-5 EmGFP	CLK	NOTEST	0	0	0	0	1	1	no	0	14737
XLOC_000939	XLOC_000939	Nmur1	chr1:86386324-86388141	chr1	86386324	86388141	d8 Nkx2-5 EmGFP	CLK	NOTEST	0	0.0203248	inf	0	1	1	no	0.0203248	1817
XLOC_000940	XLOC_000940	Pde6d	chr1:86543014-86606500	chr1	86543014	86606500	d8 Nkx2-5 EmGFP	CLK	OK	23.6911	10.6127	-1.15855	-0.511195	0.65675	0.90051	no	13.0784	63486
XLOC_000941	XLOC_000941	Nppc	chr1:86666292-86670573	chr1	86666292	86670573	d8 Nkx2-5 EmGFP	CLK	OK	0.0213106	0.116324	2.44851	1.38855	0.43715	0.78666	no	0.0950134	4281
XLOC_000942	XLOC_000942	Alppl2	chr1:87086690-87089928	chr1	87086690	87089928	d8 Nkx2-5 EmGFP	CLK	NOTEST	0	0.0276095	inf	0	1	1	no	0.0276095	3238
XLOC_000943	XLOC_000943	Alpi	chr1:87098001-87101606	chr1	87098001	87101606	d8 Nkx2-5 EmGFP	CLK	NOTEST	0	0	0	0	1	1	no	0	3605
XLOC_000944	XLOC_000944	Ecel1	chr1:87147654-87155364	chr1	87147654	87155364	d8 Nkx2-5 EmGFP	CLK	OK	0.149917	0.425446	1.50481	0.726694	0.5062	0.829929	no	0.275529	7710
XLOC_000945	XLOC_000945	Kcnj13	chr1:87326997-87450810	chr1	87326997	87450810	d8 Nkx2-5 EmGFP	CLK	NOTEST	0.0146484	0.0116912	-0.325316	0	1	1	no	0.0029572	123813
XLOC_000946	XLOC_000946	Ngef	chr1:87476828-87573870	chr1	87476828	87573870	d8 Nkx2-5 EmGFP	CLK	OK	0.266126	0.759339	1.51263	0.751862	0.49935	0.82625	no	0.493213	97042
XLOC_000947	XLOC_000947	Usp40	chr1:87853286-88008551	chr1	87853286	88008551	d8 Nkx2-5 EmGFP	CLK	OK	4.7336	1.65679	-1.51454	-0.431351	0.6975	0.917466	no	3.07681	155265
XLOC_000948	XLOC_000948	Dnajb3	chr1:88055410-88220002	chr1	88055410	88220002	d8 Nkx2-5 EmGFP	CLK	OK	2.14536	0.824781	-1.37914	-0.80295	0.58615	0.870513	no	1.32058	164592
XLOC_000949	XLOC_000949	A730008H23Rik,Hjurp	chr1:88227019-88277659	chr1	88227019	88277659	d8 Nkx2-5 EmGFP	CLK	OK	40.6605	32.7137	-0.313734	-0.239549	0.8111	0.952616	no	7.9468	50640
XLOC_000950	XLOC_000950	Glrp1	chr1:88499870-88510066	chr1	88499870	88510066	d8 Nkx2-5 EmGFP	CLK	NOTEST	0.00447123	0.010348	1.21061	0	1	1	no	0.00587677	10196
XLOC_000951	XLOC_000951	Arl4c	chr1:88698225-88702191	chr1	88698225	88702191	d8 Nkx2-5 EmGFP	CLK	OK	10.1306	17.7925	0.812553	0.630172	0.53755	0.845568	no	7.6619	3966
XLOC_000952	XLOC_000952	C030007H22Rik	chr1:89360343-89406133	chr1	89360343	89406133	d8 Nkx2-5 EmGFP	CLK	NOTEST	0	0	0	0	1	1	no	0	45790
XLOC_000953	XLOC_000953	4933400F21Rik	chr1:89454810-89908750	chr1	89454810	89908750	d8 Nkx2-5 EmGFP	CLK	NOTEST	0	0.00992829	inf	0	1	1	no	0.00992829	453940
XLOC_000954	XLOC_000954	Gbx2	chr1:89927961-89931176	chr1	89927961	89931176	d8 Nkx2-5 EmGFP	CLK	OK	0.233724	22.5676	6.5933	4.21585	0.02205	0.234004	no	22.3339	3215
XLOC_000955	XLOC_000955	-	chr1:89939416-89940209	chr1	89939416	89940209	d8 Nkx2-5 EmGFP	CLK	OK	0	0.112342	inf	#NAME?	0.0549	0.28546	no	0.112342	793
XLOC_000956	XLOC_000956	Asb18	chr1:89952677-90014577	chr1	89952677	90014577	d8 Nkx2-5 EmGFP	CLK	NOTEST	0	0.00571113	inf	0	1	1	no	0.00571113	61900
XLOC_000957	XLOC_000957	Iqca	chr1:90042131-90153401	chr1	90042131	90153401	d8 Nkx2-5 EmGFP	CLK	NOTEST	0.00487352	0.00186948	-1.38233	0	1	1	no	0.00300404	111270
XLOC_000958	XLOC_000958	Col6a3	chr1:90766858-90844202	chr1	90766858	90844202	d8 Nkx2-5 EmGFP	CLK	OK	4.91065	0.023541	-7.70459	-4.3255	0.01275	0.185567	no	4.88711	77344
XLOC_000959	XLOC_000959	Rab17	chr1:90958132-90969642	chr1	90958132	90969642	d8 Nkx2-5 EmGFP	CLK	OK	1.60335	0.516181	-1.63514	-0.798219	0.45985	0.800734	no	1.08717	11510
XLOC_000960	XLOC_000960	Ilkap	chr1:91366429-91398790	chr1	91366429	91398790	d8 Nkx2-5 EmGFP	CLK	OK	39.4967	29.2544	-0.433078	-0.319745	0.75325	0.937515	no	10.2423	32361
XLOC_000961	XLOC_000961	1700020N18Rik	chr1:91404878-91406029	chr1	91404878	91406029	d8 Nkx2-5 EmGFP	CLK	NOTEST	0	0	0	0	1	1	no	0	1151
XLOC_000962	XLOC_000962	Hes6	chr1:91411482-91413222	chr1	91411482	91413222	d8 Nkx2-5 EmGFP	CLK	OK	17.9877	17.3752	-0.049975	-0.0377708	0.9728	0.991357	no	0.6125	1740
XLOC_000963	XLOC_000963	Per2	chr1:91415981-91459328	chr1	91415981	91459328	d8 Nkx2-5 EmGFP	CLK	OK	1.2149	0.321547	-1.91773	-0.982377	0.3583	0.739442	no	0.893353	43347
XLOC_000964	XLOC_000964	Hdac4	chr1:91928776-92180326	chr1	91928776	92180326	d8 Nkx2-5 EmGFP	CLK	OK	8.7885	7.16381	-0.294888	-0.234734	0.8186	0.955257	no	1.62469	251550
XLOC_000965	XLOC_000965	Ndufa10	chr1:92439718-92473758	chr1	92439718	92473758	d8 Nkx2-5 EmGFP	CLK	OK	57.0713	154.566	1.43738	1.25698	0.2538	0.658733	no	97.4947	34040
XLOC_000966	XLOC_000966	Olfr1416	chr1:92479680-92480619	chr1	92479680	92480619	d8 Nkx2-5 EmGFP	CLK	NOTEST	0	0	0	0	1	1	no	0	939
XLOC_000967	XLOC_000967	Olfr1415	chr1:92490817-92491753	chr1	92490817	92491753	d8 Nkx2-5 EmGFP	CLK	NOTEST	0	0	0	0	1	1	no	0	936
XLOC_000968	XLOC_000968	Olfr1414	chr1:92511047-92518515	chr1	92511047	92518515	d8 Nkx2-5 EmGFP	CLK	NOTEST	0	0.0139284	inf	0	1	1	no	0.0139284	7468
XLOC_000969	XLOC_000969	Myeov2	chr1:92637144-92641985	chr1	92637144	92641985	d8 Nkx2-5 EmGFP	CLK	OK	203.02	72.2337	-1.49088	-1.09366	0.2986	0.695678	no	130.786	4841
XLOC_000970	XLOC_000970	Otos	chr1:92644148-92648841	chr1	92644148	92648841	d8 Nkx2-5 EmGFP	CLK	OK	0.0798095	0.00722997	-3.4645	-0.835203	0.2594	0.662591	no	0.0725795	4693
XLOC_000971	XLOC_000971	Ankmy1	chr1:92861155-92902906	chr1	92861155	92902906	d8 Nkx2-5 EmGFP	CLK	NOTEST	0.0556384	0.0621201	0.158979	0	1	1	no	0.0064817	41751
XLOC_000972	XLOC_000972	9430060I03Rik	chr1:92933542-92950590	chr1	92933542	92950590	d8 Nkx2-5 EmGFP	CLK	OK	0.0834273	0.0245717	-1.76352	-0.0674876	0.096	0.410434	no	0.0588556	17048
XLOC_000973	XLOC_000973	Kif1a	chr1:93015455-93101903	chr1	93015455	93101903	d8 Nkx2-5 EmGFP	CLK	OK	5.58962	29.7866	2.41384	1.82282	0.0696	0.334792	no	24.197	86448
XLOC_000974	XLOC_000974	2310007B03Rik	chr1:93151354-93160948	chr1	93151354	93160948	d8 Nkx2-5 EmGFP	CLK	OK	0.00363796	1.38496	8.5725	3.64621	0.24415	0.653694	no	1.38132	9594
XLOC_000975	XLOC_000975	Mterfd2	chr1:93235837-93306188	chr1	93235837	93306188	d8 Nkx2-5 EmGFP	CLK	OK	4.0356	7.30117	0.855344	0.503913	0.63035	0.889603	no	3.26557	70351
XLOC_000976	XLOC_000976	Pask	chr1:93308430-93373454	chr1	93308430	93373454	d8 Nkx2-5 EmGFP	CLK	OK	6.39503	11.3832	0.831878	0.419145	0.6917	0.914081	no	4.98817	65024
XLOC_000977	XLOC_000977	Hdlbp	chr1:93405834-93478808	chr1	93405834	93478808	d8 Nkx2-5 EmGFP	CLK	OK	87.0042	150.302	0.788707	0.677948	0.50815	0.830566	no	63.2978	72974
XLOC_000978	XLOC_000978	Stk25	chr1:93512102-93635727	chr1	93512102	93635727	d8 Nkx2-5 EmGFP	CLK	OK	37.3905	11.9557	-1.64497	-1.1926	0.2653	0.668021	no	25.4348	123625
XLOC_000979	XLOC_000979	Thap4	chr1:93705390-93790362	chr1	93705390	93790362	d8 Nkx2-5 EmGFP	CLK	OK	26.0561	26.1691	0.00624174	0.00366384	0.9968	0.998595	no	0.113	84972
XLOC_000980	XLOC_000980	Dtymk	chr1:93792575-93801934	chr1	93792575	93801934	d8 Nkx2-5 EmGFP	CLK	OK	92.5913	132.223	0.514024	0.401401	0.688	0.912725	no	39.6317	9359
XLOC_000981	XLOC_000981	Pdcd1	chr1:94038304-94052553	chr1	94038304	94052553	d8 Nkx2-5 EmGFP	CLK	NOTEST	0.0120438	0.0284308	1.23917	0	1	1	no	0.016387	14249
XLOC_000982	XLOC_000982	St8sia4	chr1:95587681-95667594	chr1	95587681	95667594	d8 Nkx2-5 EmGFP	CLK	OK	1.02232	0.193175	-2.40387	-1.15808	0.281	0.680916	no	0.829145	79913
XLOC_000983	XLOC_000983	4930598F16Rik	chr1:95701183-95716518	chr1	95701183	95716518	d8 Nkx2-5 EmGFP	CLK	NOTEST	0	0	0	0	1	1	no	0	15335
XLOC_000984	XLOC_000984	1700063A18Rik	chr1:95990658-96021758	chr1	95990658	96021758	d8 Nkx2-5 EmGFP	CLK	NOTEST	0	0	0	0	1	1	no	0	31100
XLOC_000985	XLOC_000985	4930533P14Rik	chr1:96612056-96662573	chr1	96612056	96662573	d8 Nkx2-5 EmGFP	CLK	NOTEST	0	0	0	0	1	1	no	0	50517
XLOC_000986	XLOC_000986	Slco4c1	chr1:96816330-96872171	chr1	96816330	96872171	d8 Nkx2-5 EmGFP	CLK	OK	0.440836	1.07775	1.28971	0.665194	0.5504	0.852925	no	0.636914	55841
XLOC_000987	XLOC_000987	Slco6b1	chr1:96906175-96997560	chr1	96906175	96997560	d8 Nkx2-5 EmGFP	CLK	NOTEST	0	0.00364316	inf	0	1	1	no	0.00364316	91385
XLOC_000988	XLOC_000988	Slco6c1	chr1:97059448-97128303	chr1	97059448	97128303	d8 Nkx2-5 EmGFP	CLK	NOTEST	0	0	0	0	1	1	no	0	68855
XLOC_000989	XLOC_000989	D1Ertd622e	chr1:97643901-97662018	chr1	97643901	97662018	d8 Nkx2-5 EmGFP	CLK	OK	2.72147	2.85068	0.066915	0.0379045	0.97225	0.99118	no	0.12921	18117
XLOC_000990	XLOC_000990	Ppip5k2	chr1:97706045-97793082	chr1	97706045	97793082	d8 Nkx2-5 EmGFP	CLK	OK	6.65785	13.0066	0.966113	0.816226	0.4805	0.813985	no	6.34875	87037
XLOC_000991	XLOC_000991	Pam	chr1:97821093-98095635	chr1	97821093	98095635	d8 Nkx2-5 EmGFP	CLK	OK	27.2832	2.81006	-3.27934	-2.52223	0.04585	0.268032	no	24.4731	274542
XLOC_000992	XLOC_000992	B230216N24Rik	chr1:97821093-98095635	chr1	97821093	98095635	d8 Nkx2-5 EmGFP	CLK	NOTEST	0.0598332	0.0160359	-1.89964	0	1	1	no	0.0437973	274542
XLOC_000993	XLOC_000993	Rnf152	chr1:105276916-105356710	chr1	105276916	105356710	d8 Nkx2-5 EmGFP	CLK	OK	0.1536	0.140987	-0.123612	-0.0610744	0.95835	0.988043	no	0.012613	79794
XLOC_000994	XLOC_000994	Pign	chr1:105518379-105663696	chr1	105518379	105663696	d8 Nkx2-5 EmGFP	CLK	OK	3.97135	1.83933	-1.11044	-0.720074	0.4936	0.822233	no	2.13202	145317
XLOC_000995	XLOC_000995	LOC626049	chr1:106152624-106171524	chr1	106152624	106171524	d8 Nkx2-5 EmGFP	CLK	NOTEST	0	0	0	0	1	1	no	0	18900
XLOC_000996	XLOC_000996	Bcl2	chr1:106538178-106714290	chr1	106538178	106714290	d8 Nkx2-5 EmGFP	CLK	OK	0.934511	0.599001	-0.641653	-0.301821	0.76545	0.94164	no	0.33551	176112
XLOC_000997	XLOC_000997	Kdsr	chr1:106720409-106759742	chr1	106720409	106759742	d8 Nkx2-5 EmGFP	CLK	OK	5.2355	1.69417	-1.62775	-1.36821	0.33045	0.720907	no	3.54133	39333
XLOC_000998	XLOC_000998	Vps4b	chr1:106770787-106796725	chr1	106770787	106796725	d8 Nkx2-5 EmGFP	CLK	OK	18.7499	19.5381	0.0594074	0.0465137	0.9631	0.988952	no	0.7882	25938
XLOC_000999	XLOC_000999	Serpinb3a	chr1:107045586-107052303	chr1	107045586	107052303	d8 Nkx2-5 EmGFP	CLK	NOTEST	0	0	0	0	1	1	no	0	6717
XLOC_001000	XLOC_001000	Serpinb3d	chr1:107078192-107083480	chr1	107078192	107083480	d8 Nkx2-5 EmGFP	CLK	NOTEST	0	0	0	0	1	1	no	0	5288
XLOC_001001	XLOC_001001	Serpinb3b	chr1:107153960-107161114	chr1	107153960	107161114	d8 Nkx2-5 EmGFP	CLK	NOTEST	0	0	0	0	1	1	no	0	7154
XLOC_001002	XLOC_001002	Serpinb3c	chr1:107271200-107278371	chr1	107271200	107278371	d8 Nkx2-5 EmGFP	CLK	NOTEST	0	0	0	0	1	1	no	0	7171
XLOC_001003	XLOC_001003	Cdh19	chr1:110889194-110977372	chr1	110889194	110977372	d8 Nkx2-5 EmGFP	CLK	NOTEST	0	0.00468517	inf	0	1	1	no	0.00468517	88178
XLOC_001004	XLOC_001004	Dsel	chr1:111858594-111864930	chr1	111858594	111864930	d8 Nkx2-5 EmGFP	CLK	OK	2.42021	1.19584	-1.01711	-0.60875	0.5621	0.858895	no	1.22437	6336
XLOC_001005	XLOC_001005	Tsn	chr1:118294571-118311456	chr1	118294571	118311456	d8 Nkx2-5 EmGFP	CLK	OK	36.4809	61.8361	0.761309	0.630051	0.5367	0.845099	no	25.3552	16885
XLOC_001006	XLOC_001006	-	chr1:118388002-118612844	chr1	118388002	118612844	d8 Nkx2-5 EmGFP	CLK	OK	0.643629	0.0492762	-3.70727	-0.0925527	0.1122	0.450352	no	0.594353	224842
XLOC_001007	XLOC_001007	2900060B14Rik	chr1:118388002-118612844	chr1	118388002	118612844	d8 Nkx2-5 EmGFP	CLK	OK	0.174456	0.34299	0.975306	0.0373114	0.0367	0.255134	no	0.168534	224842
XLOC_001008	XLOC_001008	Clasp1	chr1:118388002-118612844	chr1	118388002	118612844	d8 Nkx2-5 EmGFP	CLK	OK	0.156412	0.423725	1.43777	0.0991738	0.31305	0.708067	no	0.267313	224842
XLOC_001009	XLOC_001009	Gli2	chr1:118834060-119053619	chr1	118834060	119053619	d8 Nkx2-5 EmGFP	CLK	OK	9.63327	12.8221	0.412532	0.313437	0.73775	0.932315	no	3.18883	219559
XLOC_001010	XLOC_001010	-	chr1:119069827-119078215	chr1	119069827	119078215	d8 Nkx2-5 EmGFP	CLK	OK	0	0.398878	inf	#NAME?	0.00265	0.0773976	no	0.398878	8388
XLOC_001011	XLOC_001011	-	chr1:119129719-119152880	chr1	119129719	119152880	d8 Nkx2-5 EmGFP	CLK	NOTEST	0	0	0	0	1	1	no	0	23161
XLOC_001012	XLOC_001012	Inhbb	chr1:119415464-119422248	chr1	119415464	119422248	d8 Nkx2-5 EmGFP	CLK	OK	0.0325038	2.3768	6.19227	3.53498	0.07175	0.342095	no	2.3443	6784
XLOC_001013	XLOC_001013	-	chr1:119440181-119444342	chr1	119440181	119444342	d8 Nkx2-5 EmGFP	CLK	OK	0.0273123	0.283177	3.37408	1.78111	0.34375	0.730448	no	0.255865	4161
XLOC_001014	XLOC_001014	Ralb	chr1:119470304-119504782	chr1	119470304	119504782	d8 Nkx2-5 EmGFP	CLK	OK	51.1605	7.83069	-2.70782	-2.18657	0.06935	0.333987	no	43.3298	34478
XLOC_001015	XLOC_001015	Epb4.1l5	chr1:119545032-119649000	chr1	119545032	119649000	d8 Nkx2-5 EmGFP	CLK	OK	7.60918	7.58529	-0.00453546	-0.00321848	0.9967	0.998595	no	0.02389	103968
XLOC_001016	XLOC_001016	Ptpn4	chr1:119652475-119837666	chr1	119652475	119837666	d8 Nkx2-5 EmGFP	CLK	OK	1.38241	2.37487	0.780664	0.516887	0.61675	0.884396	no	0.99246	185191
XLOC_001017	XLOC_001017	Tmem177	chr1:119896963-119913199	chr1	119896963	119913199	d8 Nkx2-5 EmGFP	CLK	OK	4.89637	8.30064	0.761509	0.444181	0.66145	0.902158	no	3.40427	16236
XLOC_001018	XLOC_001018	Gm101	chr1:119923518-119995210	chr1	119923518	119995210	d8 Nkx2-5 EmGFP	CLK	NOTEST	0.0135552	0.0026352	-2.36286	0	1	1	no	0.01092	71692
XLOC_001019	XLOC_001019	Tmem37	chr1:120067376-120073780	chr1	120067376	120073780	d8 Nkx2-5 EmGFP	CLK	OK	11.5892	3.81566	-1.60277	-1.1489	0.41615	0.774852	no	7.77354	6404
XLOC_001020	XLOC_001020	-	chr1:120086132-120089310	chr1	120086132	120089310	d8 Nkx2-5 EmGFP	CLK	OK	0.0392282	0.244956	2.64256	1.18406	0.30805	0.704192	no	0.205728	3178
XLOC_001021	XLOC_001021	Dbi	chr1:120113279-120121096	chr1	120113279	120121096	d8 Nkx2-5 EmGFP	CLK	OK	120.744	141.579	0.229661	0.180976	0.86225	0.96582	no	20.835	7817
XLOC_001022	XLOC_001022	-	chr1:120224505-120226271	chr1	120224505	120226271	d8 Nkx2-5 EmGFP	CLK	OK	0	0.136899	inf	#NAME?	0.01755	0.213206	no	0.136899	1766
XLOC_001023	XLOC_001023	Steap3	chr1:120226415-120271082	chr1	120226415	120271082	d8 Nkx2-5 EmGFP	CLK	OK	0.44083	16.4359	5.22048	3.07164	0.0214	0.231543	no	15.9951	44667
XLOC_001024	XLOC_001024	Marco	chr1:120474537-120505084	chr1	120474537	120505084	d8 Nkx2-5 EmGFP	CLK	NOTEST	0	0	0	0	1	1	no	0	30547
XLOC_001025	XLOC_001025	Insig2	chr1:121304352-121332580	chr1	121304352	121332580	d8 Nkx2-5 EmGFP	CLK	OK	8.35551	4.71399	-0.825779	-0.510156	0.6155	0.883932	no	3.64152	28228
XLOC_001026	XLOC_001026	Htr5b	chr1:121509772-121528465	chr1	121509772	121528465	d8 Nkx2-5 EmGFP	CLK	OK	0	0.508806	inf	#NAME?	0.0036	0.0961157	no	0.508806	18693
XLOC_001027	XLOC_001027	Ddx18	chr1:121553834-121568512	chr1	121553834	121568512	d8 Nkx2-5 EmGFP	CLK	OK	4.64077	97.9792	4.40004	3.15484	0.01145	0.176924	no	93.3384	14678
XLOC_001028	XLOC_001028	Dpp10	chr1:123332137-124045559	chr1	123332137	124045559	d8 Nkx2-5 EmGFP	CLK	NOTEST	0.0041168	0.00323803	-0.346408	0	1	1	no	0.00087877	713422
XLOC_001029	XLOC_001029	Actr3	chr1:125392904-125435727	chr1	125392904	125435727	d8 Nkx2-5 EmGFP	CLK	OK	37.05	105.786	1.5136	1.28095	0.21165	0.62034	no	68.736	42823
XLOC_001030	XLOC_001030	Lypd1	chr1:125676995-125912214	chr1	125676995	125912214	d8 Nkx2-5 EmGFP	CLK	OK	0.264583	0.767787	1.53698	0.503346	0.6401	0.893896	no	0.503204	235219
XLOC_001031	XLOC_001031	Nckap5	chr1:125913635-126830632	chr1	125913635	126830632	d8 Nkx2-5 EmGFP	CLK	OK	2.23417	0.172103	-3.69839	-2.07806	0.07775	0.359781	no	2.06207	916997
XLOC_001032	XLOC_001032	Tmem163	chr1:127490341-127678021	chr1	127490341	127678021	d8 Nkx2-5 EmGFP	CLK	OK	0.988205	0.632679	-0.643336	-0.395501	0.77435	0.944073	no	0.355526	187680
XLOC_001033	XLOC_001033	2900009J06Rik	chr1:127729412-127808062	chr1	127729412	127808062	d8 Nkx2-5 EmGFP	CLK	OK	1.40238	0.303563	-2.20781	-0.132869	0.1837	0.582577	no	1.09882	78650
XLOC_001034	XLOC_001034	Ysk4	chr1:127815270-127840290	chr1	127815270	127840290	d8 Nkx2-5 EmGFP	CLK	NOTEST	0	0.00607514	inf	0	1	1	no	0.00607514	25020
XLOC_001035	XLOC_001035	Zranb3	chr1:127954185-128103043	chr1	127954185	128103043	d8 Nkx2-5 EmGFP	CLK	OK	4.91034	8.32773	0.762101	0.548388	0.5917	0.872972	no	3.41739	148858
XLOC_001036	XLOC_001036	Lct	chr1:128284763-128328318	chr1	128284763	128328318	d8 Nkx2-5 EmGFP	CLK	NOTEST	0.00515023	0.0383662	2.89713	0	1	1	no	0.033216	43555
XLOC_001037	XLOC_001037	Mcm6	chr1:128331590-128359656	chr1	128331590	128359656	d8 Nkx2-5 EmGFP	CLK	OK	57.0373	215.481	1.91758	1.74092	0.12165	0.470498	no	158.444	28066
XLOC_001038	XLOC_001038	Dars	chr1:128362118-128417416	chr1	128362118	128417416	d8 Nkx2-5 EmGFP	CLK	OK	39.9503	62.6816	0.649834	0.540684	0.5907	0.87241	no	22.7313	55298
XLOC_001039	XLOC_001039	Cxcr4	chr1:128588198-128592317	chr1	128588198	128592317	d8 Nkx2-5 EmGFP	CLK	OK	2.59846	0.755709	-1.78176	-0.919547	0.4068	0.769449	no	1.84275	4119
XLOC_001040	XLOC_001040	Daf2	chr1:130388527-130422999	chr1	130388527	130422999	d8 Nkx2-5 EmGFP	CLK	NOTEST	0	0.0116437	inf	0	1	1	no	0.0116437	34472
XLOC_001041	XLOC_001041	Cd55	chr1:130435315-130463140	chr1	130435315	130463140	d8 Nkx2-5 EmGFP	CLK	OK	2.45498	1.08437	-1.17885	-0.606209	0.57345	0.864474	no	1.37061	27825
XLOC_001042	XLOC_001042	Zp3r	chr1:130576705-130629606	chr1	130576705	130629606	d8 Nkx2-5 EmGFP	CLK	NOTEST	0	0.0108529	inf	0	1	1	no	0.0108529	52901
XLOC_001043	XLOC_001043	C4bp	chr1:130635920-130661618	chr1	130635920	130661618	d8 Nkx2-5 EmGFP	CLK	NOTEST	0.0294219	0	#NAME?	0	1	1	no	0.0294219	25698
XLOC_001044	XLOC_001044	C4bp-ps1	chr1:130670201-130681571	chr1	130670201	130681571	d8 Nkx2-5 EmGFP	CLK	NOTEST	0	0	0	0	1	1	no	0	11370
XLOC_001045	XLOC_001045	Pfkfb2	chr1:130689042-130729253	chr1	130689042	130729253	d8 Nkx2-5 EmGFP	CLK	OK	1.23557	1.08857	-0.182737	-0.0981581	0.93455	0.98349	no	0.147	40211
XLOC_001046	XLOC_001046	Il24	chr1:130882073-130887411	chr1	130882073	130887411	d8 Nkx2-5 EmGFP	CLK	OK	0	0.500042	inf	#NAME?	0.0095	0.160449	no	0.500042	5338
XLOC_001047	XLOC_001047	Il20	chr1:130907191-130911296	chr1	130907191	130911296	d8 Nkx2-5 EmGFP	CLK	NOTEST	0	0	0	0	1	1	no	0	4105
XLOC_001048	XLOC_001048	Il19	chr1:130932655-130939241	chr1	130932655	130939241	d8 Nkx2-5 EmGFP	CLK	NOTEST	0.0609196	0.00810442	-2.91013	0	1	1	no	0.0528152	6586
XLOC_001049	XLOC_001049	Mapkapk2	chr1:131053703-131097543	chr1	131053703	131097543	d8 Nkx2-5 EmGFP	CLK	OK	66.3213	32.2014	-1.04235	-0.9479	0.39925	0.764519	no	34.1199	43840
XLOC_001050	XLOC_001050	Dyrk3	chr1:131128440-131138234	chr1	131128440	131138234	d8 Nkx2-5 EmGFP	CLK	OK	2.12531	26.7982	3.65639	2.55284	0.0589	0.299178	no	24.6729	9794
XLOC_001051	XLOC_001051	Rassf5	chr1:131153177-131245178	chr1	131153177	131245178	d8 Nkx2-5 EmGFP	CLK	OK	5.39676	0.509389	-3.40525	-0.293608	0.2932	0.691789	no	4.88737	92001
XLOC_001052	XLOC_001052	Ikbke	chr1:131254601-131279564	chr1	131254601	131279564	d8 Nkx2-5 EmGFP	CLK	OK	0.368729	0.458696	0.314976	0.149095	0.88905	0.972591	no	0.089967	24963
XLOC_001053	XLOC_001053	Srgap2	chr1:131285250-131539872	chr1	131285250	131539872	d8 Nkx2-5 EmGFP	CLK	OK	8.42741	10.8278	0.361579	0.284843	0.78135	0.945595	no	2.40039	254622
XLOC_001054	XLOC_001054	Mfsd4	chr1:132007604-132068062	chr1	132007604	132068062	d8 Nkx2-5 EmGFP	CLK	OK	0.0411734	0.278532	2.75806	0.201737	0.4238	0.779856	no	0.237359	60458
XLOC_001055	XLOC_001055	Cdk18	chr1:132113546-132139734	chr1	132113546	132139734	d8 Nkx2-5 EmGFP	CLK	OK	1.37161	10.2383	2.90003	1.79887	0.1111	0.448252	no	8.86669	26188
XLOC_001056	XLOC_001056	-	chr1:132258965-132291805	chr1	132258965	132291805	d8 Nkx2-5 EmGFP	CLK	NOTEST	0.0189414	0.0497864	1.39421	0	1	1	no	0.030845	32840
XLOC_001057	XLOC_001057	Tmcc2	chr1:132356314-132391281	chr1	132356314	132391281	d8 Nkx2-5 EmGFP	CLK	OK	11.425	3.85713	-1.5666	-1.07646	0.2997	0.696715	no	7.56787	34967
XLOC_001058	XLOC_001058	Dstyk	chr1:132417452-132508639	chr1	132417452	132508639	d8 Nkx2-5 EmGFP	CLK	OK	0.120785	0.0500421	-1.27122	-0.0343736	0.06465	0.317688	no	0.0707429	91187
XLOC_001059	XLOC_001059	Cntn2	chr1:132509424-132542940	chr1	132509424	132542940	d8 Nkx2-5 EmGFP	CLK	OK	0.0885766	1.01107	3.51282	1.79932	0.1123	0.450575	no	0.922493	33516
XLOC_001060	XLOC_001060	Nfasc	chr1:132564689-132742012	chr1	132564689	132742012	d8 Nkx2-5 EmGFP	CLK	OK	0.164387	4.04074	4.61945	2.26973	0.03645	0.255134	no	3.87635	177323
XLOC_001061	XLOC_001061	Mdm4	chr1:132986257-133025393	chr1	132986257	133025393	d8 Nkx2-5 EmGFP	CLK	OK	10.1425	8.75651	-0.21199	-0.162177	0.8709	0.96878	no	1.38599	39136
XLOC_001062	XLOC_001062	Gm19461	chr1:133164512-133303435	chr1	133164512	133303435	d8 Nkx2-5 EmGFP	CLK	OK	0.0921597	0	#NAME?	#NAME?	0.0621	0.309469	no	0.0921597	138923
XLOC_001063	XLOC_001063	Sox13	chr1:133382294-133424545	chr1	133382294	133424545	d8 Nkx2-5 EmGFP	CLK	OK	12.1389	15.7779	0.378273	0.296873	0.7639	0.941246	no	3.639	42251
XLOC_001064	XLOC_001064	Snrpe	chr1:133603870-133610280	chr1	133603870	133610280	d8 Nkx2-5 EmGFP	CLK	OK	51.8068	365.437	2.81841	2.0837	0.06075	0.304922	no	313.63	6410
XLOC_001065	XLOC_001065	Zbed6,Zc3h11a	chr1:133619849-133661798	chr1	133619849	133661798	d8 Nkx2-5 EmGFP	CLK	OK	20.8321	21.9939	0.078298	0.0625652	0.95155	0.986683	no	1.1618	41949
XLOC_001066	XLOC_001066	Lax1	chr1:133679028-133692570	chr1	133679028	133692570	d8 Nkx2-5 EmGFP	CLK	OK	0.126798	0.24506	0.950603	0.421744	0.6824	0.910028	no	0.118262	13542
XLOC_001067	XLOC_001067	Atp2b4	chr1:133702673-133801011	chr1	133702673	133801011	d8 Nkx2-5 EmGFP	CLK	OK	5.04871	1.81172	-1.47856	-1.02731	0.33005	0.720553	no	3.23699	98338
XLOC_001068	XLOC_001068	Optc	chr1:133897193-133908572	chr1	133897193	133908572	d8 Nkx2-5 EmGFP	CLK	OK	0.155464	0.015082	-3.36569	-1.35659	0.1835	0.582277	no	0.140382	11379
XLOC_001069	XLOC_001069	Prelp	chr1:133910303-133921401	chr1	133910303	133921401	d8 Nkx2-5 EmGFP	CLK	OK	0.274403	0.0232037	-3.56387	-1.64631	0.20345	0.610408	no	0.251199	11098
XLOC_001070	XLOC_001070	-	chr1:134060047-134060850	chr1	134060047	134060850	d8 Nkx2-5 EmGFP	CLK	OK	0.416587	0.0890057	-2.22665	-1.51865	0.45855	0.800347	no	0.327581	803
XLOC_001071	XLOC_001071	Btg2	chr1:134074864-134079155	chr1	134074864	134079155	d8 Nkx2-5 EmGFP	CLK	OK	19.0862	8.81334	-1.11477	-1.01069	0.4263	0.781091	no	10.2729	4291
XLOC_001072	XLOC_001072	Adora1	chr1:134193418-134235431	chr1	134193418	134235431	d8 Nkx2-5 EmGFP	CLK	OK	2.01493	0.158541	-3.6678	-1.91415	0.1128	0.451714	no	1.85639	42013
XLOC_001073	XLOC_001073	Ppfia4	chr1:134292549-134344949	chr1	134292549	134344949	d8 Nkx2-5 EmGFP	CLK	OK	4.48167	2.52916	-0.825379	-0.584988	0.5706	0.862945	no	1.95251	52400
XLOC_001074	XLOC_001074	Tmem183a	chr1:134346096-134361999	chr1	134346096	134361999	d8 Nkx2-5 EmGFP	CLK	OK	15.8727	45.862	1.53075	1.22894	0.2321	0.640602	no	29.9893	15903
XLOC_001075	XLOC_001075	4931440L10Rik	chr1:134540366-134549658	chr1	134540366	134549658	d8 Nkx2-5 EmGFP	CLK	OK	0.00387616	0.312025	6.33089	1.669	0.1847	0.583733	no	0.308149	9292
XLOC_001076	XLOC_001076	Ppp1r12b	chr1:134754531-134955940	chr1	134754531	134955940	d8 Nkx2-5 EmGFP	CLK	OK	0.790981	0.378095	-1.06489	-0.582623	0.5777	0.866722	no	0.412886	201409
XLOC_001077	XLOC_001077	Lgr6	chr1:134986326-135105276	chr1	134986326	135105276	d8 Nkx2-5 EmGFP	CLK	OK	0.062189	0.580066	3.22149	1.54353	0.1823	0.580474	no	0.517877	118950
XLOC_001078	XLOC_001078	Ptprv	chr1:135108496-135132575	chr1	135108496	135132575	d8 Nkx2-5 EmGFP	CLK	OK	0.746561	1.9099	1.35517	0.801303	0.44945	0.793926	no	1.16334	24079
XLOC_001079	XLOC_001079	Gpr37l1	chr1:135160249-135167681	chr1	135160249	135167681	d8 Nkx2-5 EmGFP	CLK	OK	0.111419	0.0697517	-0.675696	-0.34065	0.78325	0.945843	no	0.0416673	7432
XLOC_001080	XLOC_001080	Elf3	chr1:135253573-135258472	chr1	135253573	135258472	d8 Nkx2-5 EmGFP	CLK	OK	2.6065	24.1329	3.21082	2.05435	0.077	0.357621	no	21.5264	4899
XLOC_001081	XLOC_001081	Rnpep	chr1:135262698-135284084	chr1	135262698	135284084	d8 Nkx2-5 EmGFP	CLK	OK	8.85397	29.0656	1.71492	1.28282	0.2254	0.635334	no	20.2116	21386
XLOC_001082	XLOC_001082	Timm17a	chr1:135301534-135313737	chr1	135301534	135313737	d8 Nkx2-5 EmGFP	CLK	OK	39.1115	142.589	1.8662	1.91564	0.1756	0.569885	no	103.477	12203
XLOC_001083	XLOC_001083	Shisa4	chr1:135371157-135375063	chr1	135371157	135375063	d8 Nkx2-5 EmGFP	CLK	OK	19.965	3.04279	-2.714	-1.60464	0.1503	0.526345	no	16.9222	3906
XLOC_001084	XLOC_001084	Ipo9	chr1:135380286-135432209	chr1	135380286	135432209	d8 Nkx2-5 EmGFP	CLK	OK	29.8491	60.8734	1.02813	0.900653	0.37745	0.750728	no	31.0243	51923
XLOC_001085	XLOC_001085	Nav1	chr1:135434579-135688237	chr1	135434579	135688237	d8 Nkx2-5 EmGFP	CLK	OK	10.1443	13.1182	0.370902	0.313063	0.75885	0.939659	no	2.9739	253658
XLOC_001086	XLOC_001086	Pkp1	chr1:135871394-135919024	chr1	135871394	135919024	d8 Nkx2-5 EmGFP	CLK	NOTEST	0.00877618	0.0110581	0.333442	0	1	1	no	0.00228192	47630
XLOC_001087	XLOC_001087	Igfn1	chr1:135953577-136006342	chr1	135953577	136006342	d8 Nkx2-5 EmGFP	CLK	NOTEST	0.0143178	0.000583322	-4.61737	0	1	1	no	0.0137345	52765
XLOC_001088	XLOC_001088	6530439I21	chr1:136127718-136131183	chr1	136127718	136131183	d8 Nkx2-5 EmGFP	CLK	NOTEST	0.0416126	0	#NAME?	0	1	1	no	0.0416126	3465
XLOC_001089	XLOC_001089	5730559C18Rik	chr1:136213521-136234280	chr1	136213521	136234280	d8 Nkx2-5 EmGFP	CLK	OK	3.05283	16.2139	2.40901	1.63937	0.13225	0.490471	no	13.1611	20759
XLOC_001090	XLOC_001090	Gpr25	chr1:136258913-136260873	chr1	136258913	136260873	d8 Nkx2-5 EmGFP	CLK	OK	0.0628887	0.151545	1.26887	0.860071	0.6265	0.888492	no	0.0886563	1960
XLOC_001091	XLOC_001091	Camsap2	chr1:136268122-136346132	chr1	136268122	136346132	d8 Nkx2-5 EmGFP	CLK	OK	7.1157	7.50619	0.0770754	0.0610213	0.95335	0.987009	no	0.39049	78010
XLOC_001092	XLOC_001092	9230116N13Rik	chr1:136411915-136440220	chr1	136411915	136440220	d8 Nkx2-5 EmGFP	CLK	OK	0.330815	0.118771	-1.47784	-0.145155	0.4758	0.811709	no	0.212044	28305
XLOC_001093	XLOC_001093	Nr5a2	chr1:136842576-136960448	chr1	136842576	136960448	d8 Nkx2-5 EmGFP	CLK	OK	0.39714	10.0085	4.65544	2.67879	0.0311	0.254547	no	9.61136	117872
XLOC_001094	XLOC_001094	Ptprc	chr1:138062860-138175305	chr1	138062860	138175305	d8 Nkx2-5 EmGFP	CLK	OK	0.122483	0.010773	-3.50708	-1.60496	0.1974	0.60194	no	0.11171	112445
XLOC_001095	XLOC_001095	Nek7	chr1:138484713-138619696	chr1	138484713	138619696	d8 Nkx2-5 EmGFP	CLK	OK	7.37478	4.37669	-0.752759	-0.630516	0.63295	0.891053	no	2.99809	134983
XLOC_001096	XLOC_001096	Gm5833	chr1:138640094-138682075	chr1	138640094	138682075	d8 Nkx2-5 EmGFP	CLK	NOTEST	0	0	0	0	1	1	no	0	41981
XLOC_001097	XLOC_001097	Lhx9	chr1:138825185-138847579	chr1	138825185	138847579	d8 Nkx2-5 EmGFP	CLK	NOTEST	0.00316068	0.0103117	1.70597	0	1	1	no	0.00715102	22394
XLOC_001098	XLOC_001098	2310009B15Rik	chr1:138851978-138856854	chr1	138851978	138856854	d8 Nkx2-5 EmGFP	CLK	OK	9.05879	6.19558	-0.54808	-0.394386	0.79655	0.949219	no	2.86321	4876
XLOC_001099	XLOC_001099	Crb1	chr1:139198253-139377076	chr1	139198253	139377076	d8 Nkx2-5 EmGFP	CLK	NOTEST	0.00743986	0.0324659	2.12558	0	1	1	no	0.025026	178823
XLOC_001100	XLOC_001100	Cfhr1	chr1:139547063-139560222	chr1	139547063	139560222	d8 Nkx2-5 EmGFP	CLK	NOTEST	0	0.00511599	inf	0	1	1	no	0.00511599	13159
XLOC_001101	XLOC_001101	Gm4788	chr1:139697918-139781239	chr1	139697918	139781239	d8 Nkx2-5 EmGFP	CLK	NOTEST	0	0	0	0	1	1	no	0	83321
XLOC_001102	XLOC_001102	Cfhr2	chr1:139810291-139858699	chr1	139810291	139858699	d8 Nkx2-5 EmGFP	CLK	NOTEST	0	0.0054779	inf	0	1	1	no	0.0054779	48408
XLOC_001103	XLOC_001103	Cfh	chr1:140085854-140183411	chr1	140085854	140183411	d8 Nkx2-5 EmGFP	CLK	NOTEST	0.029652	0.0247031	-0.263434	0	1	1	no	0.0049489	97557
XLOC_001104	XLOC_001104	4930590L20Rik	chr1:140245734-140656402	chr1	140245734	140656402	d8 Nkx2-5 EmGFP	CLK	NOTEST	0	0	0	0	1	1	no	0	410668
XLOC_001105	XLOC_001105	Cdc73	chr1:143598813-143702901	chr1	143598813	143702901	d8 Nkx2-5 EmGFP	CLK	OK	11.948	29.0594	1.28223	1.08259	0.38415	0.754794	no	17.1114	104088
XLOC_001106	XLOC_001106	Trove2	chr1:143750790-143777051	chr1	143750790	143777051	d8 Nkx2-5 EmGFP	CLK	OK	5.03231	5.26902	0.0663114	0.0657217	0.96275	0.988952	no	0.23671	26261
XLOC_001107	XLOC_001107	Rgs2	chr1:143999337-144004149	chr1	143999337	144004149	d8 Nkx2-5 EmGFP	CLK	OK	1.48264	0.294054	-2.33401	-1.32426	0.29915	0.695943	no	1.18859	4812
XLOC_001108	XLOC_001108	Rgs13	chr1:144138666-144177372	chr1	144138666	144177372	d8 Nkx2-5 EmGFP	CLK	NOTEST	0	0	0	0	1	1	no	0	38706
XLOC_001109	XLOC_001109	Rgs1	chr1:144244668-144249104	chr1	144244668	144249104	d8 Nkx2-5 EmGFP	CLK	OK	0.16017	0.016217	-3.30402	-1.54767	0.33345	0.722978	no	0.143953	4436
XLOC_001110	XLOC_001110	Rgs18	chr1:144752840-144775421	chr1	144752840	144775421	d8 Nkx2-5 EmGFP	CLK	NOTEST	0.00594235	0	#NAME?	0	1	1	no	0.00594235	22581
XLOC_001111	XLOC_001111	Pla2g4a	chr1:149829621-149961284	chr1	149829621	149961284	d8 Nkx2-5 EmGFP	CLK	OK	1.72082	0.417712	-2.04251	-1.16563	0.3586	0.739532	no	1.30311	131663
XLOC_001112	XLOC_001112	7530420F21Rik	chr1:150076660-150108012	chr1	150076660	150108012	d8 Nkx2-5 EmGFP	CLK	NOTEST	0.00851355	0.00665507	-0.355307	0	1	1	no	0.00185848	31352
XLOC_001113	XLOC_001113	2310030A07Rik	chr1:150319416-150346771	chr1	150319416	150346771	d8 Nkx2-5 EmGFP	CLK	NOTEST	0	0	0	0	1	1	no	0	27355
XLOC_001114	XLOC_001114	BC003331	chr1:150361310-150466165	chr1	150361310	150466165	d8 Nkx2-5 EmGFP	CLK	OK	5.48959	1.64544	-1.73822	-0.316146	0.7227	0.927555	no	3.84415	104855
XLOC_001115	XLOC_001115	Prg4	chr1:150361310-150466165	chr1	150361310	150466165	d8 Nkx2-5 EmGFP	CLK	OK	0.0281545	0.271671	3.27042	0.0467445	0.06445	0.317088	no	0.243516	104855
XLOC_001116	XLOC_001116	Hmcn1	chr1:150562501-150993435	chr1	150562501	150993435	d8 Nkx2-5 EmGFP	CLK	OK	1.46198	0.208696	-2.80845	-1.71254	0.1258	0.477862	no	1.25328	430934
XLOC_001117	XLOC_001117	1200016B10Rik	chr1:151367698-151428435	chr1	151367698	151428435	d8 Nkx2-5 EmGFP	CLK	OK	3.70038	2.92827	-0.337624	-0.214812	0.84325	0.96132	no	0.77211	60737
XLOC_001118	XLOC_001118	Rnf2	chr1:151469405-151500823	chr1	151469405	151500823	d8 Nkx2-5 EmGFP	CLK	OK	32.546	25.7301	-0.339022	-0.345976	0.78765	0.947019	no	6.8159	31418
XLOC_001119	XLOC_001119	-	chr1:151748949-151822328	chr1	151748949	151822328	d8 Nkx2-5 EmGFP	CLK	OK	0.462755	0.650848	0.492073	0.0638906	0.54435	0.849521	no	0.188093	73379
XLOC_001120	XLOC_001120	1700025G04Rik	chr1:151884523-152090320	chr1	151884523	152090320	d8 Nkx2-5 EmGFP	CLK	OK	4.3142	1.07742	-2.00151	-1.49085	0.21315	0.62194	no	3.23678	205797
XLOC_001121	XLOC_001121	Tsen15	chr1:152370735-152386682	chr1	152370735	152386682	d8 Nkx2-5 EmGFP	CLK	OK	11.5023	30.8722	1.42439	0.949018	0.35785	0.739117	no	19.3699	15947
XLOC_001122	XLOC_001122	Rgl1	chr1:152516789-152766290	chr1	152516789	152766290	d8 Nkx2-5 EmGFP	CLK	OK	11.7101	0.841997	-3.79779	-2.31198	0.0518	0.280678	no	10.8681	249501
XLOC_001123	XLOC_001123	Smg7	chr1:152836991-152903115	chr1	152836991	152903115	d8 Nkx2-5 EmGFP	CLK	OK	15.9675	15.4829	-0.0444616	-0.0367993	0.9723	0.991198	no	0.4846	66124
XLOC_001124	XLOC_001124	Lamc2	chr1:153122617-153186835	chr1	153122617	153186835	d8 Nkx2-5 EmGFP	CLK	OK	1.76864	6.588	1.8972	1.22903	0.22915	0.638601	no	4.81936	64218
XLOC_001125	XLOC_001125	Lamc1	chr1:153218899-153332786	chr1	153218899	153332786	d8 Nkx2-5 EmGFP	CLK	OK	75.4402	113.193	0.585383	0.506276	0.61575	0.883995	no	37.7528	113887
XLOC_001126	XLOC_001126	E330020D12Rik	chr1:153404185-153414233	chr1	153404185	153414233	d8 Nkx2-5 EmGFP	CLK	OK	0.00964499	0.201222	4.38286	2.1432	0.25	0.656973	no	0.191577	10048
XLOC_001127	XLOC_001127	Dhx9	chr1:153455413-153487716	chr1	153455413	153487716	d8 Nkx2-5 EmGFP	CLK	OK	58.5137	101.986	0.801531	0.697291	0.4875	0.818593	no	43.4723	32303
XLOC_001128	XLOC_001128	Npl	chr1:153503015-153549714	chr1	153503015	153549714	d8 Nkx2-5 EmGFP	CLK	OK	12.0049	4.3539	-1.46324	-1.03876	0.41855	0.776321	no	7.651	46699
XLOC_001129	XLOC_001129	C230024C17	chr1:153721239-153737829	chr1	153721239	153737829	d8 Nkx2-5 EmGFP	CLK	NOTEST	0	0	0	0	1	1	no	0	16590
XLOC_001130	XLOC_001130	Rgsl1	chr1:153779386-153844141	chr1	153779386	153844141	d8 Nkx2-5 EmGFP	CLK	NOTEST	0	0	0	0	1	1	no	0	64755
XLOC_001131	XLOC_001131	5830403L16Rik	chr1:153849541-153851195	chr1	153849541	153851195	d8 Nkx2-5 EmGFP	CLK	NOTEST	0.0135126	0	#NAME?	0	1	1	no	0.0135126	1654
XLOC_001132	XLOC_001132	Glul	chr1:153899944-153909714	chr1	153899944	153909714	d8 Nkx2-5 EmGFP	CLK	OK	11.0216	0	#NAME?	#NAME?	0.081	0.369241	no	11.0216	9770
XLOC_001133	XLOC_001133	4930452N14Rik	chr1:154241520-154256906	chr1	154241520	154256906	d8 Nkx2-5 EmGFP	CLK	NOTEST	0	0	0	0	1	1	no	0	15386
XLOC_001134	XLOC_001134	Cacna1e	chr1:154392518-154725920	chr1	154392518	154725920	d8 Nkx2-5 EmGFP	CLK	OK	0.0883679	0.0184593	-2.25918	-1.11734	0.3652	0.743683	no	0.0699086	333402
XLOC_001135	XLOC_001135	Ier5	chr1:155096366-155099636	chr1	155096366	155099636	d8 Nkx2-5 EmGFP	CLK	OK	7.72014	2.01516	-1.93774	-1.40912	0.2689	0.671232	no	5.70498	3270
XLOC_001136	XLOC_001136	Mr1	chr1:155127276-155146817	chr1	155127276	155146817	d8 Nkx2-5 EmGFP	CLK	OK	1.13331	0.0398148	-4.83109	-2.30842	0.0827	0.373982	no	1.0935	19541
XLOC_001137	XLOC_001137	-	chr1:155212481-155244629	chr1	155212481	155244629	d8 Nkx2-5 EmGFP	CLK	OK	6.27128	0.683513	-3.19772	-1.70018	0.0924	0.401296	no	5.58777	32148
XLOC_001138	XLOC_001138	Xpr1	chr1:155275656-155417444	chr1	155275656	155417444	d8 Nkx2-5 EmGFP	CLK	OK	5.7233	2.12769	-1.42756	-1.21616	0.34965	0.733702	no	3.59561	141788
XLOC_001139	XLOC_001139	Lhx4	chr1:155701693-155742101	chr1	155701693	155742101	d8 Nkx2-5 EmGFP	CLK	NOTEST	0	0.00352578	inf	0	1	1	no	0.00352578	40408
XLOC_001140	XLOC_001140	Qsox1	chr1:155778154-155812941	chr1	155778154	155812941	d8 Nkx2-5 EmGFP	CLK	OK	28.2442	3.64666	-2.95331	-2.0661	0.06185	0.308858	no	24.5975	34787
XLOC_001141	XLOC_001141	Cep350	chr1:155844963-155973255	chr1	155844963	155973255	d8 Nkx2-5 EmGFP	CLK	OK	3.23089	2.87837	-0.16668	-0.128409	0.89905	0.974964	no	0.35252	128292
XLOC_001142	XLOC_001142	Tor1aip1	chr1:156004598-156068859	chr1	156004598	156068859	d8 Nkx2-5 EmGFP	CLK	OK	8.94531	3.48437	-1.36023	-0.43582	0.73015	0.929754	no	5.46094	64261
XLOC_001143	XLOC_001143	Fam163a	chr1:156075965-156205228	chr1	156075965	156205228	d8 Nkx2-5 EmGFP	CLK	OK	1.69445	0.00768993	-7.78363	-3.55051	0.11325	0.45256	no	1.68676	129263
XLOC_001144	XLOC_001144	Tdrd5	chr1:156255295-156303615	chr1	156255295	156303615	d8 Nkx2-5 EmGFP	CLK	OK	0.703201	1.77777	1.33806	0.710167	0.5073	0.830418	no	1.07457	48320
XLOC_001145	XLOC_001145	-	chr1:156330451-156331888	chr1	156330451	156331888	d8 Nkx2-5 EmGFP	CLK	NOTEST	0.01368	0	#NAME?	0	1	1	no	0.01368	1437
XLOC_001146	XLOC_001146	-	chr1:156333201-156376513	chr1	156333201	156376513	d8 Nkx2-5 EmGFP	CLK	OK	0.161179	0.0055983	-4.84753	-0.160304	0.11905	0.465851	no	0.155581	43312
XLOC_001147	XLOC_001147	Soat1	chr1:156419252-156474377	chr1	156419252	156474377	d8 Nkx2-5 EmGFP	CLK	OK	50.1603	22.8304	-1.13559	-0.869848	0.37945	0.752189	no	27.3299	55125
XLOC_001148	XLOC_001148	Tor3a	chr1:156558740-156674339	chr1	156558740	156674339	d8 Nkx2-5 EmGFP	CLK	OK	1.34354	11.0838	3.04434	0.745184	0.53785	0.845689	no	9.74026	115599
XLOC_001149	XLOC_001149	Fam20b	chr1:156678547-156718935	chr1	156678547	156718935	d8 Nkx2-5 EmGFP	CLK	OK	11.3809	9.85298	-0.207978	-0.159048	0.8771	0.970276	no	1.52792	40388
XLOC_001150	XLOC_001150	Ralgps2	chr1:156804165-156939626	chr1	156804165	156939626	d8 Nkx2-5 EmGFP	CLK	OK	4.38262	5.44145	0.312197	0.269359	0.82285	0.955936	no	1.05883	135461
XLOC_001151	XLOC_001151	1700057K13Rik	chr1:157099147-157108645	chr1	157099147	157108645	d8 Nkx2-5 EmGFP	CLK	NOTEST	0	0	0	0	1	1	no	0	9498
XLOC_001152	XLOC_001152	Rasal2	chr1:157135033-157420236	chr1	157135033	157420236	d8 Nkx2-5 EmGFP	CLK	OK	1.51106	2.33442	0.627496	0.264172	0.83665	0.959609	no	0.82336	285203
XLOC_001153	XLOC_001153	Fam5b	chr1:158245268-158356273	chr1	158245268	158356273	d8 Nkx2-5 EmGFP	CLK	OK	0.047243	0.492073	3.3807	1.61922	0.1807	0.578173	no	0.44483	111005
XLOC_001154	XLOC_001154	Pappa2	chr1:158711730-158957438	chr1	158711730	158957438	d8 Nkx2-5 EmGFP	CLK	NOTEST	0.0115506	0.00604754	-0.933541	0	1	1	no	0.00550306	245708
XLOC_001155	XLOC_001155	-	chr1:159386284-159393093	chr1	159386284	159393093	d8 Nkx2-5 EmGFP	CLK	NOTEST	0	0.00313076	inf	0	1	1	no	0.00313076	6809
XLOC_001156	XLOC_001156	4930562F07Rik	chr1:160044379-160078586	chr1	160044379	160078586	d8 Nkx2-5 EmGFP	CLK	NOTEST	0.00182331	0.0107757	2.56315	0	1	1	no	0.00895239	34207
XLOC_001157	XLOC_001157	Tnn	chr1:160085031-160153575	chr1	160085031	160153575	d8 Nkx2-5 EmGFP	CLK	NOTEST	0	0.00580724	inf	0	1	1	no	0.00580724	68544
XLOC_001158	XLOC_001158	Cacybp	chr1:160202366-160212892	chr1	160202366	160212892	d8 Nkx2-5 EmGFP	CLK	OK	33.0089	69.669	1.07766	0.88617	0.3875	0.756863	no	36.6601	10526
XLOC_001159	XLOC_001159	Rabgap1l	chr1:160219173-160792938	chr1	160219173	160792938	d8 Nkx2-5 EmGFP	CLK	OK	1.78521	1.70979	-0.062275	-0.0445429	0.9714	0.990813	no	0.07542	573765
XLOC_001160	XLOC_001160	Gpr52	chr1:160219173-160792938	chr1	160219173	160792938	d8 Nkx2-5 EmGFP	CLK	NOTEST	0.0124846	0.0103103	-0.276062	0	1	1	no	0.0021743	573765
XLOC_001161	XLOC_001161	Zbtb37	chr1:160978605-161038537	chr1	160978605	161038537	d8 Nkx2-5 EmGFP	CLK	OK	1.33743	0.730519	-0.872466	-0.404833	0.74435	0.934743	no	0.606911	59932
XLOC_001162	XLOC_001162	Dars2	chr1:161040612-161086343	chr1	161040612	161086343	d8 Nkx2-5 EmGFP	CLK	OK	6.57131	17.9537	1.45003	1.06481	0.363	0.742687	no	11.3824	45731
XLOC_001163	XLOC_001163	Klhl20	chr1:161088377-161131479	chr1	161088377	161131479	d8 Nkx2-5 EmGFP	CLK	OK	6.13957	4.98247	-0.301275	-0.243531	0.841	0.96067	no	1.1571	43102
XLOC_001164	XLOC_001164	4930469G21Rik	chr1:161142711-161170691	chr1	161142711	161170691	d8 Nkx2-5 EmGFP	CLK	NOTEST	0	0.00910466	inf	0	1	1	no	0.00910466	27980
XLOC_001165	XLOC_001165	Prdx6	chr1:161240111-161251166	chr1	161240111	161251166	d8 Nkx2-5 EmGFP	CLK	OK	139.442	325.366	1.2224	1.3838	0.3053	0.702008	no	185.924	11055
XLOC_001166	XLOC_001166	-	chr1:161725530-161727686	chr1	161725530	161727686	d8 Nkx2-5 EmGFP	CLK	OK	61.2412	0	#NAME?	#NAME?	5e-05	0.00396813	yes	61.2412	2156
XLOC_001167	XLOC_001167	Fasl	chr1:161780691-161788495	chr1	161780691	161788495	d8 Nkx2-5 EmGFP	CLK	NOTEST	0	0.00398883	inf	0	1	1	no	0.00398883	7804
XLOC_001168	XLOC_001168	AI848100	chr1:161816111-161877251	chr1	161816111	161877251	d8 Nkx2-5 EmGFP	CLK	OK	7.02176	3.93394	-0.835858	-0.614508	0.5527	0.854284	no	3.08782	61140
XLOC_001169	XLOC_001169	4930558K02Rik	chr1:161942088-161979636	chr1	161942088	161979636	d8 Nkx2-5 EmGFP	CLK	NOTEST	0.0102138	0	#NAME?	0	1	1	no	0.0102138	37548
XLOC_001170	XLOC_001170	Dnm3	chr1:161982546-162478034	chr1	161982546	162478034	d8 Nkx2-5 EmGFP	CLK	OK	0.356853	0.0377088	-3.24236	-1.32156	0.259	0.662531	no	0.319144	495488
XLOC_001171	XLOC_001171	Mettl13	chr1:162532125-162548591	chr1	162532125	162548591	d8 Nkx2-5 EmGFP	CLK	OK	8.82698	17.3503	0.974967	0.733702	0.46905	0.807069	no	8.52332	16466
XLOC_001172	XLOC_001172	7420461P10Rik	chr1:162639149-162658219	chr1	162639149	162658219	d8 Nkx2-5 EmGFP	CLK	NOTEST	0	0	0	0	1	1	no	0	19070
XLOC_001173	XLOC_001173	Prrc2c	chr1:162671784-162740856	chr1	162671784	162740856	d8 Nkx2-5 EmGFP	CLK	OK	43.642	47.8708	0.133428	0.100935	0.9102	0.97763	no	4.2288	69072
XLOC_001174	XLOC_001174	Fmo4	chr1:162793231-162812549	chr1	162793231	162812549	d8 Nkx2-5 EmGFP	CLK	OK	0.118304	0.0186839	-2.66263	-1.17363	0.29805	0.695261	no	0.0996201	19318
XLOC_001175	XLOC_001175	Fmo1,Fmo3	chr1:162829560-162984491	chr1	162829560	162984491	d8 Nkx2-5 EmGFP	CLK	OK	2.08187	0.0282719	-6.20237	-3.09397	0.11465	0.45611	no	2.0536	154931
XLOC_001176	XLOC_001176	Fmo2	chr1:162829560-162984491	chr1	162829560	162984491	d8 Nkx2-5 EmGFP	CLK	NOTEST	0	0	0	0	1	1	no	0	154931
XLOC_001177	XLOC_001177	Fmo6	chr1:162829560-162984491	chr1	162829560	162984491	d8 Nkx2-5 EmGFP	CLK	NOTEST	0	0	0	0	1	1	no	0	154931
XLOC_001178	XLOC_001178	4921528O07Rik	chr1:163024301-163085670	chr1	163024301	163085670	d8 Nkx2-5 EmGFP	CLK	NOTEST	0	0	0	0	1	1	no	0	61369
XLOC_001179	XLOC_001179	Prrx1	chr1:163245118-163314871	chr1	163245118	163314871	d8 Nkx2-5 EmGFP	CLK	OK	5.40756	0.0154789	-8.44853	-4.31843	0.06205	0.309423	no	5.39208	69753
XLOC_001180	XLOC_001180	Gorab	chr1:163384874-163403977	chr1	163384874	163403977	d8 Nkx2-5 EmGFP	CLK	OK	3.87175	2.50654	-0.627293	-0.368295	0.7225	0.927543	no	1.36521	19103
XLOC_001181	XLOC_001181	Mettl11b	chr1:163702992-163725232	chr1	163702992	163725232	d8 Nkx2-5 EmGFP	CLK	NOTEST	0	0	0	0	1	1	no	0	22240
XLOC_001182	XLOC_001182	BC055324	chr1:163930063-163997244	chr1	163930063	163997244	d8 Nkx2-5 EmGFP	CLK	OK	11.5877	30.5283	1.39755	1.14596	0.36105	0.741734	no	18.9406	67181
XLOC_001183	XLOC_001183	-	chr1:164012082-164021019	chr1	164012082	164021019	d8 Nkx2-5 EmGFP	CLK	OK	0.0231875	0.148281	2.67691	1.45313	0.411	0.771804	no	0.125093	8937
XLOC_001184	XLOC_001184	Gm16548	chr1:164115263-164220600	chr1	164115263	164220600	d8 Nkx2-5 EmGFP	CLK	NOTEST	0	0.0169575	inf	0	1	1	no	0.0169575	105337
XLOC_001185	XLOC_001185	Blzf1	chr1:164289799-164307484	chr1	164289799	164307484	d8 Nkx2-5 EmGFP	CLK	OK	5.13876	5.87125	0.192247	0.134767	0.89445	0.97381	no	0.73249	17685
XLOC_001186	XLOC_001186	Atp1b1	chr1:164307487-164464481	chr1	164307487	164464481	d8 Nkx2-5 EmGFP	CLK	OK	27.2574	16.4006	-0.732896	-0.575748	0.6566	0.90051	no	10.8568	156994
XLOC_001187	XLOC_001187	Xcl1	chr1:164931647-164935510	chr1	164931647	164935510	d8 Nkx2-5 EmGFP	CLK	NOTEST	0	0	0	0	1	1	no	0	3863
XLOC_001188	XLOC_001188	4930568G15Rik	chr1:165066616-165091930	chr1	165066616	165091930	d8 Nkx2-5 EmGFP	CLK	NOTEST	0	0	0	0	1	1	no	0	25314
XLOC_001189	XLOC_001189	Tbx19	chr1:165137852-165160773	chr1	165137852	165160773	d8 Nkx2-5 EmGFP	CLK	NOTEST	0.0235984	0.0293355	0.313957	0	1	1	no	0.0057371	22921
XLOC_001190	XLOC_001190	Sft2d2	chr1:165174340-165194433	chr1	165174340	165194433	d8 Nkx2-5 EmGFP	CLK	OK	11.2773	8.4924	-0.409174	-0.318839	0.75875	0.939631	no	2.7849	20093
XLOC_001191	XLOC_001191	Tiprl	chr1:165212285-165236958	chr1	165212285	165236958	d8 Nkx2-5 EmGFP	CLK	OK	8.34314	7.14438	-0.223783	-0.197726	0.86945	0.968446	no	1.19876	24673
XLOC_001192	XLOC_001192	Dcaf6	chr1:165329500-165460536	chr1	165329500	165460536	d8 Nkx2-5 EmGFP	CLK	OK	5.57099	2.07598	-1.42414	-0.89135	0.39955	0.764852	no	3.49501	131036
XLOC_001193	XLOC_001193	Mpzl1	chr1:165592180-165634541	chr1	165592180	165634541	d8 Nkx2-5 EmGFP	CLK	OK	60.5146	17.8268	-1.76324	-1.40632	0.17975	0.576564	no	42.6878	42361
XLOC_001194	XLOC_001194	Rcsd1	chr1:165648944-165708094	chr1	165648944	165708094	d8 Nkx2-5 EmGFP	CLK	OK	32.7856	0.318297	-6.68655	-4.00261	0.01185	0.178776	no	32.4673	59150
XLOC_001195	XLOC_001195	Pou2f1	chr1:165788680-166002664	chr1	165788680	166002664	d8 Nkx2-5 EmGFP	CLK	OK	4.09227	15.8853	1.95672	1.6056	0.1333	0.492828	no	11.793	213984
XLOC_001196	XLOC_001196	-	chr1:166047817-166049286	chr1	166047817	166049286	d8 Nkx2-5 EmGFP	CLK	OK	0.15156	0.176276	0.217946	0.118059	0.9277	0.982056	no	0.024716	1469
XLOC_001197	XLOC_001197	Dusp27	chr1:166098147-166127898	chr1	166098147	166127898	d8 Nkx2-5 EmGFP	CLK	OK	3.22573	29.2507	3.18078	2.38227	0.0345	0.255134	no	26.025	29751
XLOC_001198	XLOC_001198	Mael	chr1:166201384-166238744	chr1	166201384	166238744	d8 Nkx2-5 EmGFP	CLK	OK	0.904419	8.02943	3.15023	2.103	0.14165	0.509199	no	7.12501	37360
XLOC_001199	XLOC_001199	Pogk	chr1:166378994-166409829	chr1	166378994	166409829	d8 Nkx2-5 EmGFP	CLK	OK	3.24772	1.13107	-1.52174	-0.77636	0.46185	0.801952	no	2.11665	30835
XLOC_001200	XLOC_001200	Gm4846	chr1:166483612-166497588	chr1	166483612	166497588	d8 Nkx2-5 EmGFP	CLK	NOTEST	0	0	0	0	1	1	no	0	13976
XLOC_001201	XLOC_001201	Gm4847	chr1:166628970-166647693	chr1	166628970	166647693	d8 Nkx2-5 EmGFP	CLK	NOTEST	0	0	0	0	1	1	no	0	18723
XLOC_001202	XLOC_001202	Fmo9	chr1:166662054-166681845	chr1	166662054	166681845	d8 Nkx2-5 EmGFP	CLK	NOTEST	0	0	0	0	1	1	no	0	19791
XLOC_001203	XLOC_001203	Gm16701	chr1:166974022-166999730	chr1	166974022	166999730	d8 Nkx2-5 EmGFP	CLK	NOTEST	0.0397	0	#NAME?	0	1	1	no	0.0397	25708
XLOC_001204	XLOC_001204	Uck2	chr1:167222888-167287670	chr1	167222888	167287670	d8 Nkx2-5 EmGFP	CLK	OK	54.532	104.713	0.941259	0.651591	0.4958	0.823906	no	50.181	64782
XLOC_001205	XLOC_001205	Mgst3	chr1:167372383-167393797	chr1	167372383	167393797	d8 Nkx2-5 EmGFP	CLK	OK	28.8597	22.3619	-0.368012	-0.34355	0.82555	0.956811	no	6.4978	21414
XLOC_001206	XLOC_001206	Lrrc52	chr1:167445674-167466780	chr1	167445674	167466780	d8 Nkx2-5 EmGFP	CLK	NOTEST	0	0.0197847	inf	0	1	1	no	0.0197847	21106
XLOC_001207	XLOC_001207	Pbx1	chr1:168119363-168432617	chr1	168119363	168432617	d8 Nkx2-5 EmGFP	CLK	OK	18.3108	5.27143	-1.79643	-1.37996	0.18265	0.58107	no	13.0394	313254
XLOC_001208	XLOC_001208	Nuf2	chr1:169497558-169531525	chr1	169497558	169531525	d8 Nkx2-5 EmGFP	CLK	OK	9.31289	14.9183	0.679785	0.498307	0.6289	0.889181	no	5.60541	33967
XLOC_001209	XLOC_001209	Rgs4	chr1:169741476-169747642	chr1	169741476	169747642	d8 Nkx2-5 EmGFP	CLK	OK	7.09865	0.0408477	-7.44115	-4.87302	0.07735	0.358724	no	7.0578	6166
XLOC_001210	XLOC_001210	Hsd17b7	chr1:169949536-169969237	chr1	169949536	169969237	d8 Nkx2-5 EmGFP	CLK	OK	8.36993	1.74814	-2.2594	-1.43783	0.18185	0.580077	no	6.62179	19701
XLOC_001211	XLOC_001211	Ddr2	chr1:169969408-170111305	chr1	169969408	170111305	d8 Nkx2-5 EmGFP	CLK	OK	1.09772	0.316032	-1.79637	-0.975614	0.3694	0.746619	no	0.781688	141897
XLOC_001212	XLOC_001212	Uap1	chr1:170139968-170174950	chr1	170139968	170174950	d8 Nkx2-5 EmGFP	CLK	OK	13.411	13.998	0.0618054	0.0456148	0.96155	0.988599	no	0.587	34982
XLOC_001213	XLOC_001213	Uhmk1	chr1:170193418-170215400	chr1	170193418	170215400	d8 Nkx2-5 EmGFP	CLK	OK	9.63916	6.18701	-0.639665	-0.500101	0.62255	0.886477	no	3.45215	21982
XLOC_001214	XLOC_001214	Gm7694,Nos1ap	chr1:170298192-170589849	chr1	170298192	170589849	d8 Nkx2-5 EmGFP	CLK	OK	3.43423	0.501101	-2.77681	-1.50826	0.15815	0.541849	no	2.93313	291657
XLOC_001215	XLOC_001215	Atf6	chr1:170704456-170868915	chr1	170704456	170868915	d8 Nkx2-5 EmGFP	CLK	OK	7.4566	6.32975	-0.236369	-0.183542	0.86085	0.965322	no	1.12685	164459
XLOC_001216	XLOC_001216	Dusp12	chr1:170874187-170885985	chr1	170874187	170885985	d8 Nkx2-5 EmGFP	CLK	OK	15.0967	27.4977	0.865077	0.617294	0.55825	0.856899	no	12.401	11798
XLOC_001217	XLOC_001217	Fcrlb	chr1:170907272-170912941	chr1	170907272	170912941	d8 Nkx2-5 EmGFP	CLK	NOTEST	0.0548633	0.012359	-2.15027	0	1	1	no	0.0425043	5669
XLOC_001218	XLOC_001218	Fcrla	chr1:170917593-170927583	chr1	170917593	170927583	d8 Nkx2-5 EmGFP	CLK	NOTEST	0	0	0	0	1	1	no	0	9990
XLOC_001219	XLOC_001219	Fcgr2b	chr1:170960558-170976267	chr1	170960558	170976267	d8 Nkx2-5 EmGFP	CLK	OK	0.14908	0.310738	1.05961	0.500545	0.6591	0.90129	no	0.161658	15709
XLOC_001220	XLOC_001220	Fcgr3	chr1:171051168-171059656	chr1	171051168	171059656	d8 Nkx2-5 EmGFP	CLK	OK	0.607353	0.148661	-2.03051	-0.961633	0.40405	0.767794	no	0.458692	8488
XLOC_001221	XLOC_001221	Sdhc	chr1:171129156-171150603	chr1	171129156	171150603	d8 Nkx2-5 EmGFP	CLK	OK	92.7969	85.4027	-0.119795	-0.125595	0.9216	0.980271	no	7.3942	21447
XLOC_001222	XLOC_001222	Pcp4l1	chr1:171173263-171196268	chr1	171173263	171196268	d8 Nkx2-5 EmGFP	CLK	OK	1.66302	0.385317	-2.10969	-1.12546	0.3658	0.74413	no	1.2777	23005
XLOC_001223	XLOC_001223	Tomm40l	chr1:171213969-171222644	chr1	171213969	171222644	d8 Nkx2-5 EmGFP	CLK	OK	14.6505	12.1555	-0.269339	-0.204867	0.845	0.961507	no	2.495	8675
XLOC_001224	XLOC_001224	Fcer1g,Ndufs2	chr1:171229344-171249923	chr1	171229344	171249923	d8 Nkx2-5 EmGFP	CLK	OK	142.871	164.844	0.206385	0.181177	0.8556	0.964321	no	21.973	20579
XLOC_001225	XLOC_001225	Ppox	chr1:171270327-171281208	chr1	171270327	171281208	d8 Nkx2-5 EmGFP	CLK	OK	8.88659	5.65244	-0.652756	-0.247139	0.82335	0.956016	no	3.23415	10881
XLOC_001226	XLOC_001226	Ufc1,Usp21	chr1:171281947-171295124	chr1	171281947	171295124	d8 Nkx2-5 EmGFP	CLK	OK	77.1396	100.212	0.377507	0.293333	0.7787	0.94549	no	23.0724	13177
XLOC_001227	XLOC_001227	Nit1	chr1:171329144-171345654	chr1	171329144	171345654	d8 Nkx2-5 EmGFP	CLK	OK	11.9728	11.4891	-0.059489	-0.0235964	0.9827	0.994062	no	0.4837	16510
XLOC_001228	XLOC_001228	Klhdc9	chr1:171358448-171360798	chr1	171358448	171360798	d8 Nkx2-5 EmGFP	CLK	OK	1.4837	0.888987	-0.738967	-0.390264	0.7425	0.933913	no	0.594713	2350
XLOC_001229	XLOC_001229	Itln1	chr1:171518123-171535294	chr1	171518123	171535294	d8 Nkx2-5 EmGFP	CLK	NOTEST	0.0154043	0	#NAME?	0	1	1	no	0.0154043	17171
XLOC_001230	XLOC_001230	Ly9	chr1:171588612-171607360	chr1	171588612	171607360	d8 Nkx2-5 EmGFP	CLK	NOTEST	0	0	0	0	1	1	no	0	18748
XLOC_001231	XLOC_001231	Slamf7	chr1:171632402-171653037	chr1	171632402	171653037	d8 Nkx2-5 EmGFP	CLK	NOTEST	0	0	0	0	1	1	no	0	20635
XLOC_001232	XLOC_001232	Vangl2	chr1:172000973-172027309	chr1	172000973	172027309	d8 Nkx2-5 EmGFP	CLK	OK	7.97731	7.98054	0.000584362	0.000402425	0.99935	0.999465	no	0.00323	26336
XLOC_001233	XLOC_001233	Nhlh1	chr1:172052291-172057596	chr1	172052291	172057596	d8 Nkx2-5 EmGFP	CLK	NOTEST	0.0817618	0.0062053	-3.71985	0	1	1	no	0.0755565	5305
XLOC_001234	XLOC_001234	Ncstn	chr1:172066012-172122333	chr1	172066012	172122333	d8 Nkx2-5 EmGFP	CLK	OK	51.8146	20.9203	-1.30845	-0.511799	0.66335	0.902948	no	30.8943	56321
XLOC_001235	XLOC_001235	Pea15a	chr1:172148014-172206814	chr1	172148014	172206814	d8 Nkx2-5 EmGFP	CLK	OK	44.6962	13.7927	-1.69624	-0.883114	0.4058	0.768821	no	30.9035	58800
XLOC_001236	XLOC_001236	Casq1	chr1:172209893-172219895	chr1	172209893	172219895	d8 Nkx2-5 EmGFP	CLK	OK	0.639252	0.613462	-0.0594115	-0.0300734	0.9782	0.992673	no	0.02579	10002
XLOC_001237	XLOC_001237	Atp1a2,Atp1a4	chr1:172223507-172298064	chr1	172223507	172298064	d8 Nkx2-5 EmGFP	CLK	OK	1.8458	0.717083	-1.36403	-0.756798	0.48225	0.815241	no	1.12872	74557
XLOC_001238	XLOC_001238	Kcnj9	chr1:172321032-172329263	chr1	172321032	172329263	d8 Nkx2-5 EmGFP	CLK	OK	0.00243187	0.0873566	5.16678	2.05935	0.29395	0.692276	no	0.0849247	8231
XLOC_001239	XLOC_001239	4933439K11Rik	chr1:172521107-172550806	chr1	172521107	172550806	d8 Nkx2-5 EmGFP	CLK	OK	0.0318545	0.133182	2.06383	0.208773	0.42345	0.779354	no	0.101327	29699
XLOC_001240	XLOC_001240	Slamf8	chr1:172581376-172590568	chr1	172581376	172590568	d8 Nkx2-5 EmGFP	CLK	NOTEST	0	0	0	0	1	1	no	0	9192
XLOC_001241	XLOC_001241	Fcrl6	chr1:172596639-172602551	chr1	172596639	172602551	d8 Nkx2-5 EmGFP	CLK	NOTEST	0	0	0	0	1	1	no	0	5912
XLOC_001242	XLOC_001242	Dusp23	chr1:172630768-172632974	chr1	172630768	172632974	d8 Nkx2-5 EmGFP	CLK	OK	1.58121	0.325942	-2.27834	-1.27238	0.3427	0.729367	no	1.25527	2206
XLOC_001243	XLOC_001243	Apcs	chr1:172893960-172895054	chr1	172893960	172895054	d8 Nkx2-5 EmGFP	CLK	NOTEST	0	0	0	0	1	1	no	0	1094
XLOC_001244	XLOC_001244	Olfr1408	chr1:173130282-173131215	chr1	173130282	173131215	d8 Nkx2-5 EmGFP	CLK	NOTEST	0	0	0	0	1	1	no	0	933
XLOC_001245	XLOC_001245	Olfr1406	chr1:173183441-173184504	chr1	173183441	173184504	d8 Nkx2-5 EmGFP	CLK	NOTEST	0	0	0	0	1	1	no	0	1063
XLOC_001246	XLOC_001246	Fcer1a	chr1:173221270-173227229	chr1	173221270	173227229	d8 Nkx2-5 EmGFP	CLK	NOTEST	0	0	0	0	1	1	no	0	5959
XLOC_001247	XLOC_001247	Gm11062	chr1:173274460-173277756	chr1	173274460	173277756	d8 Nkx2-5 EmGFP	CLK	NOTEST	0	0	0	0	1	1	no	0	3296
XLOC_001248	XLOC_001248	Cadm3,Darc	chr1:173331885-173367695	chr1	173331885	173367695	d8 Nkx2-5 EmGFP	CLK	OK	1.44966	0.901196	-0.685798	-0.347944	0.7464	0.935496	no	0.548464	35810
XLOC_001249	XLOC_001249	BC094916	chr1:173521310-173535957	chr1	173521310	173535957	d8 Nkx2-5 EmGFP	CLK	NOTEST	0	0	0	0	1	1	no	0	14647
XLOC_001250	XLOC_001250	Pydc4	chr1:173591956-173599274	chr1	173591956	173599274	d8 Nkx2-5 EmGFP	CLK	NOTEST	0	0	0	0	1	1	no	0	7318
XLOC_001251	XLOC_001251	AI607873	chr1:173723427-173741809	chr1	173723427	173741809	d8 Nkx2-5 EmGFP	CLK	NOTEST	0.0211146	0	#NAME?	0	1	1	no	0.0211146	18382
XLOC_001252	XLOC_001252	Ifi204	chr1:173747293-173766919	chr1	173747293	173766919	d8 Nkx2-5 EmGFP	CLK	NOTEST	0.0326974	0	#NAME?	0	1	1	no	0.0326974	19626
XLOC_001253	XLOC_001253	Mndal	chr1:173857219-173880544	chr1	173857219	173880544	d8 Nkx2-5 EmGFP	CLK	NOTEST	0	0.00330819	inf	0	1	1	no	0.00330819	23325
XLOC_001254	XLOC_001254	Mnda	chr1:173896354-173912922	chr1	173896354	173912922	d8 Nkx2-5 EmGFP	CLK	NOTEST	0.0202484	0	#NAME?	0	1	1	no	0.0202484	16568
XLOC_001255	XLOC_001255	Ifi203	chr1:173920402-173942492	chr1	173920402	173942492	d8 Nkx2-5 EmGFP	CLK	NOTEST	0.00374247	0	#NAME?	0	1	1	no	0.00374247	22090
XLOC_001256	XLOC_001256	Ifi202b	chr1:173962568-173982844	chr1	173962568	173982844	d8 Nkx2-5 EmGFP	CLK	OK	0.145399	0.00839098	-4.11503	-1.70041	0.2977	0.69497	no	0.137008	20276
XLOC_001257	XLOC_001257	Ifi205	chr1:174011997-174031755	chr1	174011997	174031755	d8 Nkx2-5 EmGFP	CLK	NOTEST	0	0	0	0	1	1	no	0	19758
XLOC_001258	XLOC_001258	Olfr231	chr1:174117090-174118047	chr1	174117090	174118047	d8 Nkx2-5 EmGFP	CLK	NOTEST	0	0	0	0	1	1	no	0	957
XLOC_001259	XLOC_001259	Olfr419	chr1:174249888-174250976	chr1	174249888	174250976	d8 Nkx2-5 EmGFP	CLK	NOTEST	0	0	0	0	1	1	no	0	1088
XLOC_001260	XLOC_001260	Grem2	chr1:174833784-174921917	chr1	174833784	174921917	d8 Nkx2-5 EmGFP	CLK	OK	1.93575	0.0279066	-6.11614	-3.03225	0.0603	0.30324	no	1.90784	88133
XLOC_001261	XLOC_001261	Rgs7	chr1:175059075-175492545	chr1	175059075	175492545	d8 Nkx2-5 EmGFP	CLK	OK	0.0754039	0.0843986	0.162581	0.0743558	0.9444	0.985319	no	0.0089947	433470
XLOC_001262	XLOC_001262	Fh1	chr1:175601377-175625635	chr1	175601377	175625635	d8 Nkx2-5 EmGFP	CLK	OK	44.1162	76.702	0.797955	0.722529	0.5213	0.837037	no	32.5858	24258
XLOC_001263	XLOC_001263	Chml,Opn3	chr1:175662427-175692684	chr1	175662427	175692684	d8 Nkx2-5 EmGFP	CLK	OK	4.15492	2.12158	-0.96968	-0.569339	0.59085	0.872546	no	2.03334	30257
XLOC_001264	XLOC_001264	Pld5	chr1:175962305-176275312	chr1	175962305	176275312	d8 Nkx2-5 EmGFP	CLK	OK	0.738283	0.0261647	-4.81848	-1.76228	0.13845	0.502613	no	0.712118	313007
XLOC_001265	XLOC_001265	Cep170	chr1:176733652-176814668	chr1	176733652	176814668	d8 Nkx2-5 EmGFP	CLK	OK	11.4329	4.01971	-1.50802	-1.12424	0.2743	0.675369	no	7.41319	81016
XLOC_001266	XLOC_001266	Mir350	chr1:176733652-176814668	chr1	176733652	176814668	d8 Nkx2-5 EmGFP	CLK	NOTEST	0	0	0	0	1	1	no	0	81016
XLOC_001267	XLOC_001267	Hmga2-ps1	chr1:176814783-177258838	chr1	176814783	177258838	d8 Nkx2-5 EmGFP	CLK	OK	15.0677	0.20063	-6.23078	-0.726473	0.1992	0.6046	no	14.8671	444055
XLOC_001268	XLOC_001268	Akt3	chr1:176814783-177258838	chr1	176814783	177258838	d8 Nkx2-5 EmGFP	CLK	OK	17.9469	4.57674	-1.97134	-1.33321	0.19945	0.605086	no	13.3702	444055
XLOC_001269	XLOC_001269	2310043L19Rik	chr1:177641541-177642943	chr1	177641541	177642943	d8 Nkx2-5 EmGFP	CLK	NOTEST	0	0	0	0	1	1	no	0	1402
XLOC_001270	XLOC_001270	Adss	chr1:177763177-177796509	chr1	177763177	177796509	d8 Nkx2-5 EmGFP	CLK	OK	27.1052	82.8587	1.61209	1.69456	0.2068	0.61393	no	55.7535	33332
XLOC_001271	XLOC_001271	Hnrnpu	chr1:178319152-178339132	chr1	178319152	178339132	d8 Nkx2-5 EmGFP	CLK	OK	162.438	297.48	0.872901	0.75398	0.44545	0.791112	no	135.042	19980
XLOC_001272	XLOC_001272	Smyd3	chr1:178955038-179518126	chr1	178955038	179518126	d8 Nkx2-5 EmGFP	CLK	OK	10.0831	21.0889	1.06455	0.529438	0.5892	0.871872	no	11.0058	563088
XLOC_001273	XLOC_001273	Tfb2m	chr1:179528052-179546267	chr1	179528052	179546267	d8 Nkx2-5 EmGFP	CLK	OK	1.18138	5.28282	2.16083	1.1958	0.27045	0.672195	no	4.10144	18215
XLOC_001274	XLOC_001274	Ahctf1	chr1:179744903-179804015	chr1	179744903	179804015	d8 Nkx2-5 EmGFP	CLK	OK	12.3988	28.4024	1.19581	1.12858	0.32475	0.716646	no	16.0036	59112
XLOC_001275	XLOC_001275	Adck3	chr1:179959973-180199553	chr1	179959973	180199553	d8 Nkx2-5 EmGFP	CLK	OK	1.31897	3.59851	1.44799	0.457386	0.6782	0.908397	no	2.27954	239580
XLOC_001276	XLOC_001276	Psen2	chr1:180227003-180256300	chr1	180227003	180256300	d8 Nkx2-5 EmGFP	CLK	OK	6.50039	5.25167	-0.307751	-0.194028	0.85375	0.963864	no	1.24872	29297
XLOC_001277	XLOC_001277	Gm5069	chr1:180326968-180424798	chr1	180326968	180424798	d8 Nkx2-5 EmGFP	CLK	OK	0.0920843	0.160197	0.798817	0.0690083	0.4089	0.770514	no	0.0681127	97830
XLOC_001278	XLOC_001278	6330403A02Rik	chr1:180431041-180483504	chr1	180431041	180483504	d8 Nkx2-5 EmGFP	CLK	OK	0.69529	0.017885	-5.28079	-2.62092	0.07565	0.353708	no	0.677405	52463
XLOC_001279	XLOC_001279	Mixl1	chr1:180693047-180697034	chr1	180693047	180697034	d8 Nkx2-5 EmGFP	CLK	OK	0.139359	0.929311	2.73735	1.78089	0.2747	0.675476	no	0.789952	3987
XLOC_001280	XLOC_001280	H3f3a	chr1:180802567-180813603	chr1	180802567	180813603	d8 Nkx2-5 EmGFP	CLK	OK	112.541	467.602	2.05483	1.75303	0.09025	0.395318	no	355.061	11036
XLOC_001281	XLOC_001281	-	chr1:180877350-180885619	chr1	180877350	180885619	d8 Nkx2-5 EmGFP	CLK	OK	0.205106	0.308994	0.591206	0.274236	0.8118	0.952915	no	0.103888	8269
XLOC_001282	XLOC_001282	-	chr1:180921003-180924642	chr1	180921003	180924642	d8 Nkx2-5 EmGFP	CLK	OK	0	0.276607	inf	#NAME?	0.0225	0.234004	no	0.276607	3639
XLOC_001283	XLOC_001283	Ephx1	chr1:180989555-181017495	chr1	180989555	181017495	d8 Nkx2-5 EmGFP	CLK	OK	2.8324	6.22101	1.13512	0.670803	0.5429	0.848743	no	3.38861	27940
XLOC_001284	XLOC_001284	Nvl	chr1:181087143-181145791	chr1	181087143	181145791	d8 Nkx2-5 EmGFP	CLK	OK	15.8646	31.5197	0.990447	0.753657	0.4596	0.800734	no	15.6551	58648
XLOC_001285	XLOC_001285	Wdr26	chr1:181173223-181211978	chr1	181173223	181211978	d8 Nkx2-5 EmGFP	CLK	OK	29.4618	26.4317	-0.156577	-0.121434	0.89655	0.97422	no	3.0301	38755
XLOC_001286	XLOC_001286	Ccdc121	chr1:181509632-181511451	chr1	181509632	181511451	d8 Nkx2-5 EmGFP	CLK	NOTEST	0.00968279	0	#NAME?	0	1	1	no	0.00968279	1819
XLOC_001287	XLOC_001287	-	chr1:181620805-181627162	chr1	181620805	181627162	d8 Nkx2-5 EmGFP	CLK	OK	0.0155882	0.267035	4.09851	2.05141	0.2916	0.690351	no	0.251447	6357
XLOC_001288	XLOC_001288	Lbr	chr1:181809061-181842401	chr1	181809061	181842401	d8 Nkx2-5 EmGFP	CLK	OK	34.6678	57.7739	0.736821	0.620247	0.54545	0.850252	no	23.1061	33340
XLOC_001289	XLOC_001289	Enah	chr1:181902750-182019980	chr1	181902750	182019980	d8 Nkx2-5 EmGFP	CLK	OK	32.8219	152.267	2.21387	1.89238	0.07155	0.341383	no	119.445	117230
XLOC_001290	XLOC_001290	-	chr1:182020190-182031330	chr1	182020190	182031330	d8 Nkx2-5 EmGFP	CLK	OK	0.00734928	0.696287	6.56594	0.983985	0.2155	0.624709	no	0.688938	11140
XLOC_001291	XLOC_001291	Vmn1r1	chr1:182157177-182158098	chr1	182157177	182158098	d8 Nkx2-5 EmGFP	CLK	NOTEST	0	0	0	0	1	1	no	0	921
XLOC_001292	XLOC_001292	Degs1	chr1:182275769-182282759	chr1	182275769	182282759	d8 Nkx2-5 EmGFP	CLK	OK	71.7913	69.7908	-0.0407721	-0.0449377	0.971	0.990772	no	2.0005	6990
XLOC_001293	XLOC_001293	Fbxo28	chr1:182313101-182341606	chr1	182313101	182341606	d8 Nkx2-5 EmGFP	CLK	OK	7.01684	9.87717	0.493277	0.44521	0.7227	0.927555	no	2.86033	28505
XLOC_001294	XLOC_001294	Capn2	chr1:182467253-182518270	chr1	182467253	182518270	d8 Nkx2-5 EmGFP	CLK	OK	31.7989	24.9827	-0.348048	-0.283942	0.7824	0.945601	no	6.8162	51017
XLOC_001295	XLOC_001295	4922505E12Rik	chr1:182747125-182749180	chr1	182747125	182749180	d8 Nkx2-5 EmGFP	CLK	NOTEST	0	0	0	0	1	1	no	0	2055
XLOC_001296	XLOC_001296	Disp1	chr1:183086263-183221529	chr1	183086263	183221529	d8 Nkx2-5 EmGFP	CLK	OK	5.93346	3.81232	-0.638204	-0.452349	0.65425	0.899364	no	2.12114	135266
XLOC_001297	XLOC_001297	Brox	chr1:183276341-183369749	chr1	183276341	183369749	d8 Nkx2-5 EmGFP	CLK	OK	6.15675	10.1547	0.721908	0.295644	0.8218	0.955873	no	3.99795	93408
XLOC_001298	XLOC_001298	Mia3	chr1:183276341-183369749	chr1	183276341	183369749	d8 Nkx2-5 EmGFP	CLK	OK	12.7794	9.02319	-0.502116	-0.334755	0.74555	0.935232	no	3.75621	93408
XLOC_001299	XLOC_001299	-	chr1:183941732-183944916	chr1	183941732	183944916	d8 Nkx2-5 EmGFP	CLK	NOTEST	0	0	0	0	1	1	no	0	3184
XLOC_001300	XLOC_001300	1700056E22Rik	chr1:184033031-184033998	chr1	184033031	184033998	d8 Nkx2-5 EmGFP	CLK	OK	0.899418	0.404633	-1.15238	-0.672831	0.63245	0.890866	no	0.494785	967
XLOC_001301	XLOC_001301	1700112H15Rik	chr1:184527840-184557691	chr1	184527840	184557691	d8 Nkx2-5 EmGFP	CLK	NOTEST	0	0	0	0	1	1	no	0	29851
XLOC_001302	XLOC_001302	-	chr1:184610253-184612979	chr1	184610253	184612979	d8 Nkx2-5 EmGFP	CLK	NOTEST	0	0.0383775	inf	0	1	1	no	0.0383775	2726
XLOC_001303	XLOC_001303	Hlx	chr1:184727144-184732493	chr1	184727144	184732493	d8 Nkx2-5 EmGFP	CLK	OK	4.47082	0.103832	-5.42822	-3.05727	0.0557	0.288015	no	4.36699	5349
XLOC_001304	XLOC_001304	Mosc1	chr1:184786766-184811313	chr1	184786766	184811313	d8 Nkx2-5 EmGFP	CLK	NOTEST	0.0417816	0.0424824	0.0239951	0	1	1	no	0.0007008	24547
XLOC_001305	XLOC_001305	Mosc2	chr1:184813067-184845847	chr1	184813067	184845847	d8 Nkx2-5 EmGFP	CLK	OK	14.9591	14.4789	-0.0470699	-0.0339574	0.9711	0.990774	no	0.4802	32780
XLOC_001306	XLOC_001306	Mir1981	chr1:184813067-184845847	chr1	184813067	184845847	d8 Nkx2-5 EmGFP	CLK	NOTEST	0	0	0	0	1	1	no	0	32780
XLOC_001307	XLOC_001307	C130074G19Rik	chr1:184871925-184883036	chr1	184871925	184883036	d8 Nkx2-5 EmGFP	CLK	OK	1.13019	1.18229	0.0650147	0.0324383	0.97515	0.991819	no	0.0521	11111
XLOC_001308	XLOC_001308	Mark1	chr1:184896423-184999549	chr1	184896423	184999549	d8 Nkx2-5 EmGFP	CLK	OK	2.94998	3.12947	0.0852165	0.0554062	0.95535	0.987231	no	0.17949	103126
XLOC_001309	XLOC_001309	Iars2	chr1:185204086-185329401	chr1	185204086	185329401	d8 Nkx2-5 EmGFP	CLK	OK	18.7902	24.8184	0.401429	0.242337	0.81785	0.955077	no	6.0282	125315
XLOC_001310	XLOC_001310	9630028B13Rik	chr1:185429356-185441819	chr1	185429356	185441819	d8 Nkx2-5 EmGFP	CLK	NOTEST	0.00541936	0.00216853	-1.32141	0	1	1	no	0.00325083	12463
XLOC_001311	XLOC_001311	Gm2061	chr1:185447115-185468762	chr1	185447115	185468762	d8 Nkx2-5 EmGFP	CLK	NOTEST	0.0431309	0.00238964	-4.17386	0	1	1	no	0.0407413	21647
XLOC_001312	XLOC_001312	Lyplal1	chr1:186087731-186117323	chr1	186087731	186117323	d8 Nkx2-5 EmGFP	CLK	OK	12.3217	18.7067	0.602361	0.418305	0.6913	0.913871	no	6.385	29592
XLOC_001313	XLOC_001313	Tgfb2	chr1:186622786-186706631	chr1	186622786	186706631	d8 Nkx2-5 EmGFP	CLK	OK	33.6641	1.02274	-5.0407	-3.22433	0.0163	0.20831	no	32.6414	83845
XLOC_001314	XLOC_001314	Rrp15	chr1:186721086-186749358	chr1	186721086	186749358	d8 Nkx2-5 EmGFP	CLK	OK	19.8359	74.0836	1.90104	1.40658	0.16925	0.560221	no	54.2477	28272
XLOC_001315	XLOC_001315	Spata17	chr1:187048406-187215446	chr1	187048406	187215446	d8 Nkx2-5 EmGFP	CLK	NOTEST	0.050024	0.0276981	-0.852833	0	1	1	no	0.0223259	167040
XLOC_001316	XLOC_001316	9330162B11Rik	chr1:187608740-188214951	chr1	187608740	188214951	d8 Nkx2-5 EmGFP	CLK	NOTEST	0	0	0	0	1	1	no	0	606211
XLOC_001317	XLOC_001317	Kctd3	chr1:188971097-189007840	chr1	188971097	189007840	d8 Nkx2-5 EmGFP	CLK	OK	11.9191	25.0573	1.07196	0.86056	0.4087	0.770281	no	13.1382	36743
XLOC_001318	XLOC_001318	Kcnk2	chr1:189207929-189402701	chr1	189207929	189402701	d8 Nkx2-5 EmGFP	CLK	OK	1.82181	0.806803	-1.17508	-0.618157	0.56555	0.860212	no	1.01501	194772
XLOC_001319	XLOC_001319	Cenpf	chr1:189640613-189688095	chr1	189640613	189688095	d8 Nkx2-5 EmGFP	CLK	OK	8.37495	6.76784	-0.307385	-0.256898	0.8007	0.950373	no	1.60711	47482
XLOC_001320	XLOC_001320	Smyd2	chr1:189880489-189922288	chr1	189880489	189922288	d8 Nkx2-5 EmGFP	CLK	OK	28.1947	38.8063	0.460866	0.359785	0.7317	0.930751	no	10.6116	41799
XLOC_001321	XLOC_001321	Prox1	chr1:190118061-190170680	chr1	190118061	190170680	d8 Nkx2-5 EmGFP	CLK	OK	3.30563	0.143935	-4.52143	-2.52475	0.04885	0.270019	no	3.16169	52619
XLOC_001322	XLOC_001322	Rps6kc1	chr1:190772878-190911804	chr1	190772878	190911804	d8 Nkx2-5 EmGFP	CLK	OK	6.27148	7.47984	0.254202	0.186949	0.85345	0.963864	no	1.20836	138926
XLOC_001323	XLOC_001323	Vash2	chr1:190947645-190979296	chr1	190947645	190979296	d8 Nkx2-5 EmGFP	CLK	OK	7.20532	4.00054	-0.848868	-0.593119	0.5667	0.86074	no	3.20478	31651
XLOC_001324	XLOC_001324	Mfsd7b	chr1:191005831-191029781	chr1	191005831	191029781	d8 Nkx2-5 EmGFP	CLK	OK	1.47239	1.79263	0.283917	0.170065	0.88455	0.971752	no	0.32024	23950
XLOC_001325	XLOC_001325	Tatdn3	chr1:191045829-191084615	chr1	191045829	191084615	d8 Nkx2-5 EmGFP	CLK	OK	2.83627	2.5011	-0.181431	-0.0636385	0.95975	0.988395	no	0.33517	38786
XLOC_001326	XLOC_001326	Fam71a	chr1:191162583-191164817	chr1	191162583	191164817	d8 Nkx2-5 EmGFP	CLK	NOTEST	0.0109411	0	#NAME?	0	1	1	no	0.0109411	2234
XLOC_001327	XLOC_001327	Atf3	chr1:191170296-191183333	chr1	191170296	191183333	d8 Nkx2-5 EmGFP	CLK	OK	14.89	2.88918	-2.36561	-1.49478	0.1728	0.565642	no	12.0008	13037
XLOC_001328	XLOC_001328	Nenf	chr1:191306796-191318118	chr1	191306796	191318118	d8 Nkx2-5 EmGFP	CLK	OK	66.1237	11.6316	-2.50712	-1.96695	0.1427	0.511276	no	54.4921	11322
XLOC_001329	XLOC_001329	Ppp2r5a	chr1:191325964-191397266	chr1	191325964	191397266	d8 Nkx2-5 EmGFP	CLK	OK	8.19233	15.9593	0.962053	0.611983	0.55465	0.855328	no	7.76697	71302
XLOC_001330	XLOC_001330	Dtl	chr1:191537364-191622584	chr1	191537364	191622584	d8 Nkx2-5 EmGFP	CLK	OK	9.74466	10.714	0.136811	0.0770938	0.952	0.986813	no	0.96934	85220
XLOC_001331	XLOC_001331	1700034H15Rik	chr1:191894071-191913247	chr1	191894071	191913247	d8 Nkx2-5 EmGFP	CLK	OK	0.0466419	0.0870162	0.899658	0.0702969	0.3301	0.72061	no	0.0403743	19176
XLOC_001332	XLOC_001332	Rd3	chr1:191977372-191990129	chr1	191977372	191990129	d8 Nkx2-5 EmGFP	CLK	OK	1.27201	0	#NAME?	#NAME?	0.1895	0.59044	no	1.27201	12757
XLOC_001333	XLOC_001333	Mir3473c	chr1:191997256-192000050	chr1	191997256	192000050	d8 Nkx2-5 EmGFP	CLK	OK	1.38285	0.493186	-1.48744	-0.72401	0.51435	0.833655	no	0.889664	2794
XLOC_001334	XLOC_001334	Mir3473c	chr1:191997256-192000050	chr1	191997256	192000050	d8 Nkx2-5 EmGFP	CLK	NOTEST	0	0	0	0	1	1	no	0	2794
XLOC_001335	XLOC_001335	Traf5	chr1:192054349-192092564	chr1	192054349	192092564	d8 Nkx2-5 EmGFP	CLK	OK	1.35725	0.812232	-0.740727	-0.43545	0.74735	0.935796	no	0.545018	38215
XLOC_001336	XLOC_001336	Rcor3	chr1:192098574-192151025	chr1	192098574	192151025	d8 Nkx2-5 EmGFP	CLK	OK	4.20337	0.650959	-2.69091	-1.74858	0.18385	0.582808	no	3.55241	52451
XLOC_001337	XLOC_001337	Hhat	chr1:192512827-192794978	chr1	192512827	192794978	d8 Nkx2-5 EmGFP	CLK	OK	3.99239	0.426272	-3.22741	-1.78176	0.1194	0.466408	no	3.56612	282151
XLOC_001338	XLOC_001338	Sertad4	chr1:192844486-192856920	chr1	192844486	192856920	d8 Nkx2-5 EmGFP	CLK	OK	7.86705	3.44684	-1.19055	-0.903727	0.4589	0.800566	no	4.42021	12434
XLOC_001339	XLOC_001339	Syt14	chr1:192890205-193035824	chr1	192890205	193035824	d8 Nkx2-5 EmGFP	CLK	OK	1.36847	2.01926	0.561259	0.349401	0.729	0.929324	no	0.65079	145619
XLOC_001340	XLOC_001340	-	chr1:193088700-193093010	chr1	193088700	193093010	d8 Nkx2-5 EmGFP	CLK	OK	0.0808088	0.123671	0.613927	0.321288	0.80335	0.950875	no	0.0428622	4310
XLOC_001341	XLOC_001341	Diexf	chr1:193104402-193130251	chr1	193104402	193130251	d8 Nkx2-5 EmGFP	CLK	OK	3.85327	12.4973	1.69746	1.3294	0.2377	0.646647	no	8.64403	25849
XLOC_001342	XLOC_001342	Traf3ip3	chr1:193173468-193201546	chr1	193173468	193201546	d8 Nkx2-5 EmGFP	CLK	OK	0.0522971	0.0820317	0.649449	0.0532301	0.3512	0.734869	no	0.0297346	28078
XLOC_001343	XLOC_001343	Hsd11b1	chr1:193221640-193264045	chr1	193221640	193264045	d8 Nkx2-5 EmGFP	CLK	NOTEST	0.0662396	0	#NAME?	0	1	1	no	0.0662396	42405
XLOC_001344	XLOC_001344	G0s2	chr1:193272159-193273799	chr1	193272159	193273799	d8 Nkx2-5 EmGFP	CLK	OK	21.8529	0.452174	-5.5948	-3.08488	0.03145	0.255134	no	21.4007	1640
XLOC_001345	XLOC_001345	Camk1g	chr1:193346345-193370282	chr1	193346345	193370282	d8 Nkx2-5 EmGFP	CLK	OK	2.32013	0.129951	-4.15817	-2.07951	0.0949	0.407368	no	2.19018	23937
XLOC_001346	XLOC_001346	Mir205	chr1:193507462-193507530	chr1	193507462	193507530	d8 Nkx2-5 EmGFP	CLK	NOTEST	0	0	0	0	1	1	no	0	68
XLOC_001347	XLOC_001347	4930503O07Rik	chr1:194212186-194222759	chr1	194212186	194222759	d8 Nkx2-5 EmGFP	CLK	NOTEST	0	0	0	0	1	1	no	0	10573
XLOC_001348	XLOC_001348	Gm16897	chr1:194938820-194976959	chr1	194938820	194976959	d8 Nkx2-5 EmGFP	CLK	NOTEST	0.0167632	0.0164527	-0.0269723	0	1	1	no	0.0003105	38139
XLOC_001349	XLOC_001349	Cd46	chr1:195041899-195092248	chr1	195041899	195092248	d8 Nkx2-5 EmGFP	CLK	NOTEST	0.0495901	0.0235985	-1.07136	0	1	1	no	0.0259916	50349
XLOC_001350	XLOC_001350	Cr1l	chr1:195095308-195131747	chr1	195095308	195131747	d8 Nkx2-5 EmGFP	CLK	OK	9.62343	17.778	0.885469	0.578822	0.56625	0.860444	no	8.15457	36439
XLOC_001351	XLOC_001351	Cr2	chr1:195136810-195176715	chr1	195136810	195176715	d8 Nkx2-5 EmGFP	CLK	NOTEST	0.0358744	0.0353596	-0.0208517	0	1	1	no	0.0005148	39905
XLOC_001352	XLOC_001352	-	chr1:3199874-3200613	chr1	3199874	3200613	d8 Nkx2-5 EmGFP	CLK	OK	0.149541	0.189024	0.338028	0.201737	0.89055	0.972651	no	0.039483	739
XLOC_001353	XLOC_001353	-	chr1:3200693-3204682	chr1	3200693	3204682	d8 Nkx2-5 EmGFP	CLK	OK	0.0325197	0.142865	2.13526	1.03715	0.40825	0.770007	no	0.110345	3989
XLOC_001354	XLOC_001354	-	chr1:4522831-4523557	chr1	4522831	4523557	d8 Nkx2-5 EmGFP	CLK	OK	0.689193	0	#NAME?	#NAME?	0.0112	0.174753	no	0.689193	726
XLOC_001355	XLOC_001355	-	chr1:4525420-4525988	chr1	4525420	4525988	d8 Nkx2-5 EmGFP	CLK	OK	1.58233	0	#NAME?	#NAME?	0.00675	0.134895	no	1.58233	568
XLOC_001356	XLOC_001356	-	chr1:4687978-4688085	chr1	4687978	4688085	d8 Nkx2-5 EmGFP	CLK	OK	2460.47	0	#NAME?	#NAME?	0.02535	0.239279	no	2460.47	107
XLOC_001357	XLOC_001357	-	chr1:4688581-4689239	chr1	4688581	4689239	d8 Nkx2-5 EmGFP	CLK	OK	16.6713	0	#NAME?	#NAME?	0.00025	0.0159561	yes	16.6713	658
XLOC_001358	XLOC_001358	-	chr1:4693318-4693563	chr1	4693318	4693563	d8 Nkx2-5 EmGFP	CLK	OK	5.22951	0	#NAME?	#NAME?	0.01325	0.189344	no	5.22951	245
XLOC_001359	XLOC_001359	-	chr1:4900931-4902100	chr1	4900931	4902100	d8 Nkx2-5 EmGFP	CLK	NOTEST	0.00839972	0.0595086	2.82468	0	1	1	no	0.0511089	1169
XLOC_001360	XLOC_001360	-	chr1:5303809-5304722	chr1	5303809	5304722	d8 Nkx2-5 EmGFP	CLK	OK	0.170482	0.00896119	-4.24978	-1.86796	0.3413	0.728202	no	0.161521	913
XLOC_001361	XLOC_001361	-	chr1:5305808-5306276	chr1	5305808	5306276	d8 Nkx2-5 EmGFP	CLK	OK	0.352456	0	#NAME?	#NAME?	0.0369	0.255134	no	0.352456	468
XLOC_001362	XLOC_001362	-	chr1:6279736-6281231	chr1	6279736	6281231	d8 Nkx2-5 EmGFP	CLK	NOTEST	0.00630471	0	#NAME?	0	1	1	no	0.00630471	1495
XLOC_001363	XLOC_001363	-	chr1:6439576-6440859	chr1	6439576	6440859	d8 Nkx2-5 EmGFP	CLK	OK	0.474092	0.0118418	-5.32321	-2.5989	0.2637	0.666789	no	0.46225	1283
XLOC_001364	XLOC_001364	-	chr1:6916499-6916882	chr1	6916499	6916882	d8 Nkx2-5 EmGFP	CLK	OK	0.628505	0.0671923	-3.22555	-2.57642	0.36535	0.743768	no	0.561313	383
XLOC_001365	XLOC_001365	-	chr1:7088323-7088793	chr1	7088323	7088793	d8 Nkx2-5 EmGFP	CLK	OK	0.408309	0.0464518	-3.13585	-2.13431	0.3735	0.74852	no	0.361857	470
XLOC_001366	XLOC_001366	-	chr1:7314664-7398035	chr1	7314664	7398035	d8 Nkx2-5 EmGFP	CLK	OK	0	0.106691	inf	#NAME?	0.1984	0.603108	no	0.106691	83371
XLOC_001367	XLOC_001367	-	chr1:7314664-7398035	chr1	7314664	7398035	d8 Nkx2-5 EmGFP	CLK	NOTEST	0.00833178	0.0852584	3.35515	0	1	1	no	0.0769266	83371
XLOC_001368	XLOC_001368	-	chr1:7314664-7398035	chr1	7314664	7398035	d8 Nkx2-5 EmGFP	CLK	OK	0	0.111882	inf	#NAME?	0.23435	0.64351	no	0.111882	83371
XLOC_001369	XLOC_001369	Sntg1	chr1:8359597-9299884	chr1	8359597	9299884	d8 Nkx2-5 EmGFP	CLK	OK	0	0.483998	inf	#NAME?	0.1154	0.457712	no	0.483998	940287
XLOC_001370	XLOC_001370	-	chr1:9782101-9782345	chr1	9782101	9782345	d8 Nkx2-5 EmGFP	CLK	OK	31.1558	0	#NAME?	#NAME?	0.00105	0.0458019	yes	31.1558	244
XLOC_001371	XLOC_001371	-	chr1:10232787-10233086	chr1	10232787	10233086	d8 Nkx2-5 EmGFP	CLK	OK	1.49099	1.67153	0.164893	0.195244	0.94115	0.984459	no	0.18054	299
XLOC_001372	XLOC_001372	-	chr1:13093999-13094536	chr1	13093999	13094536	d8 Nkx2-5 EmGFP	CLK	OK	0	0.693067	inf	#NAME?	0.018	0.214311	no	0.693067	537
XLOC_001373	XLOC_001373	-	chr1:15799045-15800554	chr1	15799045	15800554	d8 Nkx2-5 EmGFP	CLK	OK	0	0.147135	inf	#NAME?	0.02225	0.234004	no	0.147135	1509
XLOC_001374	XLOC_001374	-	chr1:16540794-16542063	chr1	16540794	16542063	d8 Nkx2-5 EmGFP	CLK	NOTEST	0.0457364	0.0839703	0.876538	0	1	1	no	0.0382339	1269
XLOC_001375	XLOC_001375	-	chr1:16768964-16770102	chr1	16768964	16770102	d8 Nkx2-5 EmGFP	CLK	OK	4.98743	0.00682884	-9.51244	-4.18734	0.2512	0.657036	no	4.9806	1138
XLOC_001376	XLOC_001376	-	chr1:16912006-16913029	chr1	16912006	16913029	d8 Nkx2-5 EmGFP	CLK	OK	0	0.132164	inf	#NAME?	0.0364	0.255134	no	0.132164	1023
XLOC_001377	XLOC_001377	-	chr1:17397515-17397779	chr1	17397515	17397779	d8 Nkx2-5 EmGFP	CLK	OK	14.5858	0	#NAME?	#NAME?	0.0017	0.0597196	no	14.5858	264
XLOC_001378	XLOC_001378	-	chr1:17397989-17398733	chr1	17397989	17398733	d8 Nkx2-5 EmGFP	CLK	OK	7.61731	0	#NAME?	#NAME?	0.0002	0.0131954	yes	7.61731	744
XLOC_001379	XLOC_001379	-	chr1:17398982-17399232	chr1	17398982	17399232	d8 Nkx2-5 EmGFP	CLK	OK	8.69819	0	#NAME?	#NAME?	0.00645	0.131855	no	8.69819	250
XLOC_001380	XLOC_001380	-	chr1:17769507-17769629	chr1	17769507	17769629	d8 Nkx2-5 EmGFP	CLK	OK	136.834	0	#NAME?	#NAME?	0.0361	0.255134	no	136.834	122
XLOC_001381	XLOC_001381	-	chr1:17770289-17770848	chr1	17770289	17770848	d8 Nkx2-5 EmGFP	CLK	OK	0.355203	0	#NAME?	#NAME?	0.03085	0.253185	no	0.355203	559
XLOC_001382	XLOC_001382	-	chr1:17777247-17777858	chr1	17777247	17777858	d8 Nkx2-5 EmGFP	CLK	OK	0.506378	0.0462763	-3.45187	-2.13271	0.3182	0.712276	no	0.460102	611
XLOC_001383	XLOC_001383	-	chr1:18551495-18553015	chr1	18551495	18553015	d8 Nkx2-5 EmGFP	CLK	NOTEST	0	0.0583664	inf	0	1	1	no	0.0583664	1520
XLOC_001384	XLOC_001384	-	chr1:19060432-19061334	chr1	19060432	19061334	d8 Nkx2-5 EmGFP	CLK	NOTEST	0	0.0910011	inf	0	1	1	no	0.0910011	902
XLOC_001385	XLOC_001385	-	chr1:19330969-19331328	chr1	19330969	19331328	d8 Nkx2-5 EmGFP	CLK	OK	1.75952	0	#NAME?	#NAME?	0.01315	0.188716	no	1.75952	359
XLOC_001386	XLOC_001386	-	chr1:19331444-19333200	chr1	19331444	19333200	d8 Nkx2-5 EmGFP	CLK	OK	4.8559	0	#NAME?	#NAME?	5e-05	0.00396813	yes	4.8559	1756
XLOC_001387	XLOC_001387	-	chr1:21218574-21283734	chr1	21218574	21283734	d8 Nkx2-5 EmGFP	CLK	OK	1.00244	0	#NAME?	#NAME?	0.13325	0.492823	no	1.00244	65160
XLOC_001388	XLOC_001388	-	chr1:23260787-23261822	chr1	23260787	23261822	d8 Nkx2-5 EmGFP	CLK	NOTEST	0	0.0306546	inf	0	1	1	no	0.0306546	1035
XLOC_001389	XLOC_001389	-	chr1:23269450-23271162	chr1	23269450	23271162	d8 Nkx2-5 EmGFP	CLK	NOTEST	0	0.00849862	inf	0	1	1	no	0.00849862	1712
XLOC_001390	XLOC_001390	-	chr1:23295012-23295791	chr1	23295012	23295791	d8 Nkx2-5 EmGFP	CLK	NOTEST	0.0139421	0.0220167	0.659152	0	1	1	no	0.0080746	779
XLOC_001391	XLOC_001391	-	chr1:24595098-24595428	chr1	24595098	24595428	d8 Nkx2-5 EmGFP	CLK	OK	10.3183	0	#NAME?	#NAME?	0.00195	0.0646796	no	10.3183	330
XLOC_001392	XLOC_001392	-	chr1:26027010-26028936	chr1	26027010	26028936	d8 Nkx2-5 EmGFP	CLK	NOTEST	0	0	0	0	1	1	no	0	1926
XLOC_001393	XLOC_001393	-	chr1:27991041-27991154	chr1	27991041	27991154	d8 Nkx2-5 EmGFP	CLK	OK	365.603	0	#NAME?	#NAME?	0.04475	0.265051	no	365.603	113
XLOC_001394	XLOC_001394	-	chr1:28580296-28580747	chr1	28580296	28580747	d8 Nkx2-5 EmGFP	CLK	OK	34.3438	0	#NAME?	#NAME?	5e-05	0.00396813	yes	34.3438	451
XLOC_001395	XLOC_001395	-	chr1:28800229-28800410	chr1	28800229	28800410	d8 Nkx2-5 EmGFP	CLK	OK	8.23021	0	#NAME?	#NAME?	0.02605	0.24092	no	8.23021	181
XLOC_001396	XLOC_001396	-	chr1:29737207-29737575	chr1	29737207	29737575	d8 Nkx2-5 EmGFP	CLK	OK	25.3059	0	#NAME?	#NAME?	0.0001	0.00743051	yes	25.3059	368
XLOC_001397	XLOC_001397	-	chr1:30769882-30770095	chr1	30769882	30770095	d8 Nkx2-5 EmGFP	CLK	OK	16.3555	0	#NAME?	#NAME?	0.0049	0.115156	no	16.3555	213
XLOC_001398	XLOC_001398	-	chr1:30977004-30999886	chr1	30977004	30999886	d8 Nkx2-5 EmGFP	CLK	OK	0	1.90172	inf	#NAME?	0.22665	0.636418	no	1.90172	22882
XLOC_001399	XLOC_001399	-	chr1:31615304-31616750	chr1	31615304	31616750	d8 Nkx2-5 EmGFP	CLK	OK	13.5722	0	#NAME?	#NAME?	5e-05	0.00396813	yes	13.5722	1446
XLOC_001400	XLOC_001400	-	chr1:33100883-33101257	chr1	33100883	33101257	d8 Nkx2-5 EmGFP	CLK	OK	4.5177	0	#NAME?	#NAME?	0.00495	0.115303	no	4.5177	374
XLOC_001401	XLOC_001401	-	chr1:33101490-33101682	chr1	33101490	33101682	d8 Nkx2-5 EmGFP	CLK	OK	18.4073	0	#NAME?	#NAME?	0.0057	0.122861	no	18.4073	192
XLOC_001402	XLOC_001402	-	chr1:33102030-33102254	chr1	33102030	33102254	d8 Nkx2-5 EmGFP	CLK	OK	14.4689	0	#NAME?	#NAME?	0.004	0.102724	no	14.4689	224
XLOC_001403	XLOC_001403	-	chr1:33372847-33372993	chr1	33372847	33372993	d8 Nkx2-5 EmGFP	CLK	OK	21.6212	0	#NAME?	#NAME?	0.03465	0.255134	no	21.6212	146
XLOC_001404	XLOC_001404	-	chr1:33713448-33714209	chr1	33713448	33714209	d8 Nkx2-5 EmGFP	CLK	OK	0.0287601	0.113569	1.98143	1.10995	0.5233	0.837869	no	0.0848089	761
XLOC_001405	XLOC_001405	-	chr1:34486004-34486517	chr1	34486004	34486517	d8 Nkx2-5 EmGFP	CLK	OK	0.30396	0	#NAME?	#NAME?	0.0369	0.255134	no	0.30396	513
XLOC_001406	XLOC_001406	-	chr1:34487887-34488449	chr1	34487887	34488449	d8 Nkx2-5 EmGFP	CLK	OK	0.308316	0	#NAME?	#NAME?	0.03465	0.255134	no	0.308316	562
XLOC_001407	XLOC_001407	-	chr1:34969665-34969859	chr1	34969665	34969859	d8 Nkx2-5 EmGFP	CLK	OK	27.5143	0	#NAME?	#NAME?	0.0037	0.0976249	no	27.5143	194
XLOC_001408	XLOC_001408	-	chr1:36030842-36031406	chr1	36030842	36031406	d8 Nkx2-5 EmGFP	CLK	OK	0	0.191111	inf	#NAME?	0.049	0.270019	no	0.191111	564
XLOC_001409	XLOC_001409	-	chr1:36558477-36560211	chr1	36558477	36560211	d8 Nkx2-5 EmGFP	CLK	OK	1.95081	0.100528	-4.2784	-2.31835	0.11645	0.459981	no	1.85028	1734
XLOC_001410	XLOC_001410	-	chr1:39761789-39763248	chr1	39761789	39763248	d8 Nkx2-5 EmGFP	CLK	NOTEST	0	0	0	0	1	1	no	0	1459
XLOC_001411	XLOC_001411	-	chr1:43189048-43189695	chr1	43189048	43189695	d8 Nkx2-5 EmGFP	CLK	OK	131.233	51.5627	-1.34773	-1.44921	0.33255	0.722189	no	79.6703	647
XLOC_001412	XLOC_001412	-	chr1:43746996-43748014	chr1	43746996	43748014	d8 Nkx2-5 EmGFP	CLK	OK	0.148916	0.16425	0.141396	0.077914	0.95165	0.986686	no	0.015334	1018
XLOC_001413	XLOC_001413	-	chr1:43887989-43888107	chr1	43887989	43888107	d8 Nkx2-5 EmGFP	CLK	OK	686.449	0	#NAME?	#NAME?	0.0116	0.177836	no	686.449	118
XLOC_001414	XLOC_001414	-	chr1:43888215-43888606	chr1	43888215	43888606	d8 Nkx2-5 EmGFP	CLK	OK	44.2842	0	#NAME?	#NAME?	5e-05	0.00396813	yes	44.2842	391
XLOC_001415	XLOC_001415	-	chr1:43889304-43889730	chr1	43889304	43889730	d8 Nkx2-5 EmGFP	CLK	OK	1.03456	0.0826301	-3.64621	-2.80439	0.3022	0.699104	no	0.95193	426
XLOC_001416	XLOC_001416	-	chr1:44055974-44056974	chr1	44055974	44056974	d8 Nkx2-5 EmGFP	CLK	NOTEST	0	0.00799578	inf	0	1	1	no	0.00799578	1000
XLOC_001417	XLOC_001417	-	chr1:44058442-44059906	chr1	44058442	44059906	d8 Nkx2-5 EmGFP	CLK	NOTEST	0	0	0	0	1	1	no	0	1464
XLOC_001418	XLOC_001418	-	chr1:44059998-44061168	chr1	44059998	44061168	d8 Nkx2-5 EmGFP	CLK	NOTEST	0	0.0066053	inf	0	1	1	no	0.0066053	1170
XLOC_001419	XLOC_001419	-	chr1:44069554-44070356	chr1	44069554	44070356	d8 Nkx2-5 EmGFP	CLK	NOTEST	0	0	0	0	1	1	no	0	802
XLOC_001420	XLOC_001420	-	chr1:44381546-44383637	chr1	44381546	44383637	d8 Nkx2-5 EmGFP	CLK	NOTEST	0	0.00340104	inf	0	1	1	no	0.00340104	2091
XLOC_001421	XLOC_001421	-	chr1:44463935-44464291	chr1	44463935	44464291	d8 Nkx2-5 EmGFP	CLK	OK	29.2617	0	#NAME?	#NAME?	0.0005	0.0273862	yes	29.2617	356
XLOC_001422	XLOC_001422	-	chr1:45856282-45857770	chr1	45856282	45857770	d8 Nkx2-5 EmGFP	CLK	OK	76.9829	0.029904	-11.33	-7.00082	0.15145	0.528206	no	76.953	1488
XLOC_001423	XLOC_001423	-	chr1:46770188-46770767	chr1	46770188	46770767	d8 Nkx2-5 EmGFP	CLK	OK	0.0210672	0.150306	2.83483	1.6982	0.42855	0.782294	no	0.129239	579
XLOC_001424	XLOC_001424	-	chr1:46897932-46898976	chr1	46897932	46898976	d8 Nkx2-5 EmGFP	CLK	NOTEST	0	0	0	0	1	1	no	0	1044
XLOC_001425	XLOC_001425	-	chr1:47365992-47366333	chr1	47365992	47366333	d8 Nkx2-5 EmGFP	CLK	OK	7.71739	0	#NAME?	#NAME?	0.00185	0.0630883	no	7.71739	341
XLOC_001426	XLOC_001426	-	chr1:49555436-49555981	chr1	49555436	49555981	d8 Nkx2-5 EmGFP	CLK	OK	19.7925	0.0549232	-8.49332	-6.04747	0.20505	0.611879	no	19.7376	545
XLOC_001427	XLOC_001427	-	chr1:52503474-52504085	chr1	52503474	52504085	d8 Nkx2-5 EmGFP	CLK	OK	0	0.154254	inf	#NAME?	0.0549	0.28546	no	0.154254	611
XLOC_001428	XLOC_001428	-	chr1:55127576-55128119	chr1	55127576	55128119	d8 Nkx2-5 EmGFP	CLK	OK	12.0164	0.0184119	-9.35015	-5.26942	0.2514	0.657108	no	11.998	543
XLOC_001429	XLOC_001429	-	chr1:55128240-55128393	chr1	55128240	55128393	d8 Nkx2-5 EmGFP	CLK	OK	150.676	0	#NAME?	#NAME?	0.002	0.0654078	no	150.676	153
XLOC_001430	XLOC_001430	-	chr1:55128635-55128804	chr1	55128635	55128804	d8 Nkx2-5 EmGFP	CLK	OK	21.5072	0.503855	-5.41566	-24.1409	0.28995	0.688704	no	21.0033	169
XLOC_001431	XLOC_001431	-	chr1:55161100-55162162	chr1	55161100	55162162	d8 Nkx2-5 EmGFP	CLK	NOTEST	0.028284	0.0519798	0.877966	0	1	1	no	0.0236958	1062
XLOC_001432	XLOC_001432	-	chr1:55244645-55247717	chr1	55244645	55247717	d8 Nkx2-5 EmGFP	CLK	OK	0.0428595	0.170421	1.99142	0.986352	0.4379	0.787005	no	0.127561	3072
XLOC_001433	XLOC_001433	-	chr1:55248000-55363480	chr1	55248000	55363480	d8 Nkx2-5 EmGFP	CLK	NOTEST	0	0.0240586	inf	0	1	1	no	0.0240586	115480
XLOC_001434	XLOC_001434	-	chr1:55248000-55363480	chr1	55248000	55363480	d8 Nkx2-5 EmGFP	CLK	OK	0	0.182258	inf	#NAME?	0.2415	0.651103	no	0.182258	115480
XLOC_001435	XLOC_001435	-	chr1:56980552-56981537	chr1	56980552	56981537	d8 Nkx2-5 EmGFP	CLK	NOTEST	0	0	0	0	1	1	no	0	985
XLOC_001436	XLOC_001436	-	chr1:58387758-58389056	chr1	58387758	58389056	d8 Nkx2-5 EmGFP	CLK	OK	0.252402	0.134333	-0.909913	-0.488702	0.72115	0.92715	no	0.118069	1298
XLOC_001437	XLOC_001437	-	chr1:58389167-58390138	chr1	58389167	58390138	d8 Nkx2-5 EmGFP	CLK	OK	0.242043	0.174166	-0.474803	-0.264802	0.8489	0.962874	no	0.067877	971
XLOC_001438	XLOC_001438	-	chr1:59672935-59675138	chr1	59672935	59675138	d8 Nkx2-5 EmGFP	CLK	NOTEST	0.00817904	0.0289043	1.82128	0	1	1	no	0.0207253	2203
XLOC_001439	XLOC_001439	-	chr1:59714592-59715499	chr1	59714592	59715499	d8 Nkx2-5 EmGFP	CLK	OK	0.699077	0.198801	-1.81412	-1.06624	0.4672	0.805887	no	0.500276	907
XLOC_001440	XLOC_001440	-	chr1:59715551-59717764	chr1	59715551	59717764	d8 Nkx2-5 EmGFP	CLK	OK	0.590052	0.194937	-1.59783	-0.841997	0.4957	0.823852	no	0.395115	2213
XLOC_001441	XLOC_001441	-	chr1:59717834-59718747	chr1	59717834	59718747	d8 Nkx2-5 EmGFP	CLK	OK	0.988793	0.286758	-1.78583	-1.06805	0.4684	0.806764	no	0.702035	913
XLOC_001442	XLOC_001442	-	chr1:59762207-59763366	chr1	59762207	59763366	d8 Nkx2-5 EmGFP	CLK	OK	0.551604	0.0267219	-4.36754	-2.32887	0.2506	0.656973	no	0.524882	1159
XLOC_001443	XLOC_001443	-	chr1:60055859-60056215	chr1	60055859	60056215	d8 Nkx2-5 EmGFP	CLK	OK	0	0.46684	inf	#NAME?	0.0476	0.270019	no	0.46684	356
XLOC_001444	XLOC_001444	-	chr1:60068589-60069261	chr1	60068589	60069261	d8 Nkx2-5 EmGFP	CLK	NOTEST	0.0170235	0.0269287	0.661614	0	1	1	no	0.0099052	672
XLOC_001445	XLOC_001445	-	chr1:60070871-60072306	chr1	60070871	60072306	d8 Nkx2-5 EmGFP	CLK	OK	0.0991207	0.0675557	-0.553108	-0.283918	0.83075	0.958131	no	0.031565	1435
XLOC_001446	XLOC_001446	-	chr1:60073113-60074621	chr1	60073113	60074621	d8 Nkx2-5 EmGFP	CLK	OK	0.174793	0.16688	-0.0668382	-0.0357108	0.9729	0.991359	no	0.007913	1508
XLOC_001447	XLOC_001447	-	chr1:60153286-60153823	chr1	60153286	60153823	d8 Nkx2-5 EmGFP	CLK	OK	0.896616	0.24351	-1.88051	-1.32195	0.47195	0.809355	no	0.653106	537
XLOC_001448	XLOC_001448	-	chr1:60394825-60395679	chr1	60394825	60395679	d8 Nkx2-5 EmGFP	CLK	NOTEST	0.0123722	0.0878433	2.82783	0	1	1	no	0.0754711	854
XLOC_001449	XLOC_001449	-	chr1:60703912-60705706	chr1	60703912	60705706	d8 Nkx2-5 EmGFP	CLK	OK	520.136	0.141111	-11.8478	-7.65613	0.0401	0.255134	no	519.995	1794
XLOC_001450	XLOC_001450	-	chr1:61487595-61488285	chr1	61487595	61488285	d8 Nkx2-5 EmGFP	CLK	OK	0	0.207638	inf	#NAME?	0.03895	0.255134	no	0.207638	690
XLOC_001451	XLOC_001451	-	chr1:63220733-63221822	chr1	63220733	63221822	d8 Nkx2-5 EmGFP	CLK	OK	0	0.302486	inf	#NAME?	0.01545	0.205065	no	0.302486	1089
XLOC_001452	XLOC_001452	-	chr1:63223108-63223863	chr1	63223108	63223863	d8 Nkx2-5 EmGFP	CLK	OK	0	0.263994	inf	#NAME?	0.0289	0.250203	no	0.263994	755
XLOC_001453	XLOC_001453	-	chr1:63226166-63227973	chr1	63226166	63227973	d8 Nkx2-5 EmGFP	CLK	OK	0	0.259953	inf	#NAME?	0.0096	0.160884	no	0.259953	1807
XLOC_001454	XLOC_001454	-	chr1:63240158-63240668	chr1	63240158	63240668	d8 Nkx2-5 EmGFP	CLK	OK	0	0.203179	inf	#NAME?	0.0549	0.28546	no	0.203179	510
XLOC_001455	XLOC_001455	-	chr1:63247724-63248445	chr1	63247724	63248445	d8 Nkx2-5 EmGFP	CLK	OK	0.0463772	0.13438	1.53483	0.888644	0.59825	0.875943	no	0.0880028	721
XLOC_001456	XLOC_001456	-	chr1:63249365-63251358	chr1	63249365	63251358	d8 Nkx2-5 EmGFP	CLK	OK	0	0.114757	inf	#NAME?	0.0202	0.22635	no	0.114757	1993
XLOC_001457	XLOC_001457	-	chr1:63252161-63253080	chr1	63252161	63253080	d8 Nkx2-5 EmGFP	CLK	OK	0	0.115533	inf	#NAME?	0.04105	0.255134	no	0.115533	919
XLOC_001458	XLOC_001458	-	chr1:63260119-63260577	chr1	63260119	63260577	d8 Nkx2-5 EmGFP	CLK	OK	0	0.31545	inf	#NAME?	0.04105	0.255134	no	0.31545	458
XLOC_001459	XLOC_001459	-	chr1:63261090-63263510	chr1	63261090	63263510	d8 Nkx2-5 EmGFP	CLK	OK	0.00369194	0.115949	4.97297	2.22336	0.3028	0.699763	no	0.112257	2420
XLOC_001460	XLOC_001460	-	chr1:63364471-63365359	chr1	63364471	63365359	d8 Nkx2-5 EmGFP	CLK	OK	61.717	0.00928327	-12.6987	-6.29383	0.25055	0.656973	no	61.7077	888
XLOC_001461	XLOC_001461	-	chr1:68032116-68034862	chr1	68032116	68034862	d8 Nkx2-5 EmGFP	CLK	OK	0.315701	0.00505732	-5.96404	-2.68764	0.252	0.657183	no	0.310644	2746
XLOC_001462	XLOC_001462	-	chr1:71709716-71709934	chr1	71709716	71709934	d8 Nkx2-5 EmGFP	CLK	OK	4.29296	0	#NAME?	#NAME?	0.02165	0.231763	no	4.29296	218
XLOC_001463	XLOC_001463	-	chr1:71711140-71712009	chr1	71711140	71712009	d8 Nkx2-5 EmGFP	CLK	OK	0.229894	0.0190879	-3.59024	-1.87326	0.33995	0.727292	no	0.210806	869
XLOC_001464	XLOC_001464	-	chr1:71714170-71714424	chr1	71714170	71714424	d8 Nkx2-5 EmGFP	CLK	OK	20.9731	0	#NAME?	#NAME?	0.00155	0.0564113	no	20.9731	254
XLOC_001465	XLOC_001465	-	chr1:71754675-71755266	chr1	71754675	71755266	d8 Nkx2-5 EmGFP	CLK	NOTEST	0.0408822	0	#NAME?	0	1	1	no	0.0408822	591
XLOC_001466	XLOC_001466	-	chr1:72254589-72255934	chr1	72254589	72255934	d8 Nkx2-5 EmGFP	CLK	OK	0.73357	0.128855	-2.50919	-1.37963	0.32625	0.717632	no	0.604715	1345
XLOC_001467	XLOC_001467	-	chr1:72718694-72720620	chr1	72718694	72720620	d8 Nkx2-5 EmGFP	CLK	OK	0.0995669	0.100568	0.0144378	0.00723948	0.97765	0.99248	no	0.0010011	1926
XLOC_001468	XLOC_001468	-	chr1:72823784-72824337	chr1	72823784	72824337	d8 Nkx2-5 EmGFP	CLK	OK	0.225641	0.465466	1.04465	0.712178	0.6812	0.909849	no	0.239825	553
XLOC_001469	XLOC_001469	-	chr1:74957443-74958191	chr1	74957443	74958191	d8 Nkx2-5 EmGFP	CLK	OK	0.0147138	0.116226	2.98169	1.61724	0.42445	0.780003	no	0.101512	748
XLOC_001470	XLOC_001470	-	chr1:74963678-74964297	chr1	74963678	74964297	d8 Nkx2-5 EmGFP	CLK	OK	0.019115	0.333	4.12274	2.42086	0.33825	0.725935	no	0.313885	619
XLOC_001471	XLOC_001471	-	chr1:75233761-75234384	chr1	75233761	75234384	d8 Nkx2-5 EmGFP	CLK	OK	0.0189395	0.209942	3.47052	2.02652	0.37735	0.750701	no	0.191002	623
XLOC_001472	XLOC_001472	-	chr1:75561636-75562868	chr1	75561636	75562868	d8 Nkx2-5 EmGFP	CLK	NOTEST	0.0552501	0	#NAME?	0	1	1	no	0.0552501	1232
XLOC_001473	XLOC_001473	-	chr1:77066451-77066787	chr1	77066451	77066787	d8 Nkx2-5 EmGFP	CLK	OK	2.6724	0	#NAME?	#NAME?	0.00885	0.154774	no	2.6724	336
XLOC_001474	XLOC_001474	-	chr1:77515330-77516964	chr1	77515330	77516964	d8 Nkx2-5 EmGFP	CLK	OK	0.25644	0.0985431	-1.3798	-0.716015	0.58035	0.867863	no	0.157897	1634
XLOC_001475	XLOC_001475	-	chr1:78603019-78604004	chr1	78603019	78604004	d8 Nkx2-5 EmGFP	CLK	OK	0	0.122207	inf	#NAME?	0.0413	0.255134	no	0.122207	985
XLOC_001476	XLOC_001476	-	chr1:78604729-78605675	chr1	78604729	78605675	d8 Nkx2-5 EmGFP	CLK	NOTEST	0	0.0856876	inf	0	1	1	no	0.0856876	946
XLOC_001477	XLOC_001477	-	chr1:78783631-78784799	chr1	78783631	78784799	d8 Nkx2-5 EmGFP	CLK	OK	5.89421	0	#NAME?	#NAME?	5e-05	0.00396813	yes	5.89421	1168
XLOC_001478	XLOC_001478	-	chr1:78967609-78968098	chr1	78967609	78968098	d8 Nkx2-5 EmGFP	CLK	OK	13.8602	0	#NAME?	#NAME?	0.0005	0.0273862	yes	13.8602	489
XLOC_001479	XLOC_001479	-	chr1:79922656-79923502	chr1	79922656	79923502	d8 Nkx2-5 EmGFP	CLK	OK	3.23083	0	#NAME?	#NAME?	0.00205	0.0664693	no	3.23083	846
XLOC_001480	XLOC_001480	-	chr1:79957567-79958056	chr1	79957567	79958056	d8 Nkx2-5 EmGFP	CLK	OK	4.67474	0	#NAME?	#NAME?	0.0022	0.0689011	no	4.67474	489
XLOC_001481	XLOC_001481	-	chr1:80383014-80385364	chr1	80383014	80385364	d8 Nkx2-5 EmGFP	CLK	OK	0.121967	0.158617	0.379054	0.193139	0.8735	0.96922	no	0.03665	2350
XLOC_001482	XLOC_001482	-	chr1:81741639-81742849	chr1	81741639	81742849	d8 Nkx2-5 EmGFP	CLK	OK	1.05622	0	#NAME?	#NAME?	0.00195	0.0646796	no	1.05622	1210
XLOC_001483	XLOC_001483	-	chr1:82291705-82292893	chr1	82291705	82292893	d8 Nkx2-5 EmGFP	CLK	NOTEST	0.00824013	0.0129717	0.654634	0	1	1	no	0.00473157	1188
XLOC_001484	XLOC_001484	-	chr1:82814873-82816456	chr1	82814873	82816456	d8 Nkx2-5 EmGFP	CLK	OK	0.035442	0.17181	2.27728	1.16601	0.41875	0.776478	no	0.136368	1583
XLOC_001485	XLOC_001485	-	chr1:82901731-82903317	chr1	82901731	82903317	d8 Nkx2-5 EmGFP	CLK	NOTEST	0.0235773	0.0324346	0.460134	0	1	1	no	0.0088573	1586
XLOC_001486	XLOC_001486	-	chr1:82906093-82907269	chr1	82906093	82907269	d8 Nkx2-5 EmGFP	CLK	NOTEST	0.0834021	0.00656501	-3.66722	0	1	1	no	0.0768371	1176
XLOC_001487	XLOC_001487	-	chr1:82908702-82909156	chr1	82908702	82909156	d8 Nkx2-5 EmGFP	CLK	NOTEST	0.0309015	0	#NAME?	0	1	1	no	0.0309015	454
XLOC_001488	XLOC_001488	-	chr1:82909386-82909972	chr1	82909386	82909972	d8 Nkx2-5 EmGFP	CLK	OK	0.144882	0.0328082	-2.14275	-1.26981	0.48505	0.817014	no	0.112074	586
XLOC_001489	XLOC_001489	-	chr1:82910401-82911478	chr1	82910401	82911478	d8 Nkx2-5 EmGFP	CLK	NOTEST	0.0648824	0	#NAME?	0	1	1	no	0.0648824	1077
XLOC_001490	XLOC_001490	-	chr1:82911600-82913483	chr1	82911600	82913483	d8 Nkx2-5 EmGFP	CLK	NOTEST	0.0777849	0.0305559	-1.34804	0	1	1	no	0.047229	1883
XLOC_001491	XLOC_001491	-	chr1:83003970-83004091	chr1	83003970	83004091	d8 Nkx2-5 EmGFP	CLK	OK	1287.12	0	#NAME?	#NAME?	0.00395	0.101958	no	1287.12	121
XLOC_001492	XLOC_001492	-	chr1:83004384-83004697	chr1	83004384	83004697	d8 Nkx2-5 EmGFP	CLK	OK	18.4966	0	#NAME?	#NAME?	0.0015	0.0556607	no	18.4966	313
XLOC_001493	XLOC_001493	-	chr1:86473643-86474385	chr1	86473643	86474385	d8 Nkx2-5 EmGFP	CLK	OK	0.0148732	0.223241	3.90782	2.13446	0.3483	0.733045	no	0.208368	742
XLOC_001494	XLOC_001494	-	chr1:86487749-86488293	chr1	86487749	86488293	d8 Nkx2-5 EmGFP	CLK	OK	0.485788	0.275395	-0.818825	-0.56458	0.7463	0.935486	no	0.210393	544
XLOC_001495	XLOC_001495	-	chr1:86503723-86504104	chr1	86503723	86504104	d8 Nkx2-5 EmGFP	CLK	OK	0.0423212	0.339408	3.00357	2.40162	0.41625	0.774852	no	0.297087	381
XLOC_001496	XLOC_001496	-	chr1:86509665-86510584	chr1	86509665	86510584	d8 Nkx2-5 EmGFP	CLK	OK	0	0.311051	inf	#NAME?	0.02045	0.22635	no	0.311051	919
XLOC_001497	XLOC_001497	-	chr1:86523389-86524958	chr1	86523389	86524958	d8 Nkx2-5 EmGFP	CLK	OK	0.113371	0.0281444	-2.01013	-1.00873	0.4668	0.805678	no	0.0852266	1569
XLOC_001498	XLOC_001498	-	chr1:87454977-87455722	chr1	87454977	87455722	d8 Nkx2-5 EmGFP	CLK	OK	0.0887583	0.1636	0.88222	0.520654	0.73715	0.932096	no	0.0748417	745
XLOC_001499	XLOC_001499	-	chr1:88524096-88526032	chr1	88524096	88526032	d8 Nkx2-5 EmGFP	CLK	NOTEST	0	0.00740678	inf	0	1	1	no	0.00740678	1936
XLOC_001500	XLOC_001500	-	chr1:90285418-90286213	chr1	90285418	90286213	d8 Nkx2-5 EmGFP	CLK	OK	0.190045	0.0107161	-4.14849	-1.90016	0.34655	0.732266	no	0.179329	795
XLOC_001501	XLOC_001501	-	chr1:90287341-90288024	chr1	90287341	90288024	d8 Nkx2-5 EmGFP	CLK	OK	0.233036	0.0131625	-4.14605	-2.00294	0.34655	0.732266	no	0.219873	683
XLOC_001502	XLOC_001502	-	chr1:90517135-90518110	chr1	90517135	90518110	d8 Nkx2-5 EmGFP	CLK	OK	0.0104701	0.13202	3.6564	1.84112	0.36925	0.746465	no	0.12155	975
XLOC_001503	XLOC_001503	-	chr1:91248113-91249251	chr1	91248113	91249251	d8 Nkx2-5 EmGFP	CLK	OK	0	0.143406	inf	#NAME?	0.02735	0.245204	no	0.143406	1138
XLOC_001504	XLOC_001504	-	chr1:91294406-91297498	chr1	91294406	91297498	d8 Nkx2-5 EmGFP	CLK	OK	2.45738	0.0222692	-6.78593	-3.61491	0.10965	0.444294	no	2.43511	3092
XLOC_001505	XLOC_001505	-	chr1:91860575-91861576	chr1	91860575	91861576	d8 Nkx2-5 EmGFP	CLK	NOTEST	0.0101353	0	#NAME?	0	1	1	no	0.0101353	1001
XLOC_001506	XLOC_001506	-	chr1:91863081-91868835	chr1	91863081	91868835	d8 Nkx2-5 EmGFP	CLK	OK	0.119922	0.00232204	-5.69056	-2.44594	0.2559	0.660255	no	0.1176	5754
XLOC_001507	XLOC_001507	-	chr1:92783194-92784524	chr1	92783194	92784524	d8 Nkx2-5 EmGFP	CLK	NOTEST	0.0432935	0	#NAME?	0	1	1	no	0.0432935	1330
XLOC_001508	XLOC_001508	-	chr1:92784580-92787723	chr1	92784580	92787723	d8 Nkx2-5 EmGFP	CLK	NOTEST	0.0808709	0	#NAME?	0	1	1	no	0.0808709	3143
XLOC_001509	XLOC_001509	-	chr1:92831343-92831588	chr1	92831343	92831588	d8 Nkx2-5 EmGFP	CLK	OK	4.49981	2.50621	-0.844358	-1.43422	0.732	0.930757	no	1.9936	245
XLOC_001510	XLOC_001510	-	chr1:93193042-93201606	chr1	93193042	93201606	d8 Nkx2-5 EmGFP	CLK	OK	0	0.12156	inf	#NAME?	0.18525	0.584587	no	0.12156	8564
XLOC_001511	XLOC_001511	-	chr1:93206838-93231033	chr1	93206838	93231033	d8 Nkx2-5 EmGFP	CLK	OK	0	0.285293	inf	#NAME?	0.1886	0.589271	no	0.285293	24195
XLOC_001512	XLOC_001512	-	chr1:93206838-93231033	chr1	93206838	93231033	d8 Nkx2-5 EmGFP	CLK	OK	0	0.193414	inf	#NAME?	0.1738	0.566956	no	0.193414	24195
XLOC_001513	XLOC_001513	-	chr1:93988882-93990367	chr1	93988882	93990367	d8 Nkx2-5 EmGFP	CLK	OK	0	0.164854	inf	#NAME?	0.0199	0.225701	no	0.164854	1485
XLOC_001514	XLOC_001514	-	chr1:94467141-94469292	chr1	94467141	94469292	d8 Nkx2-5 EmGFP	CLK	OK	4.11389	0	#NAME?	#NAME?	5e-05	0.00396813	yes	4.11389	2151
XLOC_001515	XLOC_001515	-	chr1:95498579-95499203	chr1	95498579	95499203	d8 Nkx2-5 EmGFP	CLK	OK	3227.19	0	#NAME?	#NAME?	5e-05	0.00396813	yes	3227.19	624
XLOC_001516	XLOC_001516	-	chr1:98267152-98267525	chr1	98267152	98267525	d8 Nkx2-5 EmGFP	CLK	OK	14.2411	0	#NAME?	#NAME?	0.0008	0.0382241	yes	14.2411	373
XLOC_001517	XLOC_001517	-	chr1:98764985-98765797	chr1	98764985	98765797	d8 Nkx2-5 EmGFP	CLK	NOTEST	0	0	0	0	1	1	no	0	812
XLOC_001518	XLOC_001518	-	chr1:99190254-99190362	chr1	99190254	99190362	d8 Nkx2-5 EmGFP	CLK	OK	289.171	2336.19	3.01417	1854.62	0.3521	0.735281	no	2047.02	108
XLOC_001519	XLOC_001519	-	chr1:101386238-101386353	chr1	101386238	101386353	d8 Nkx2-5 EmGFP	CLK	OK	1269.11	0	#NAME?	#NAME?	0.00995	0.163475	no	1269.11	115
XLOC_001520	XLOC_001520	-	chr1:101887146-101887574	chr1	101887146	101887574	d8 Nkx2-5 EmGFP	CLK	NOTEST	0	0	0	0	1	1	no	0	428
XLOC_001521	XLOC_001521	-	chr1:105455938-105458909	chr1	105455938	105458909	d8 Nkx2-5 EmGFP	CLK	OK	13.5851	0.113871	-6.89848	-4.13157	0.0289	0.250203	no	13.4712	2971
XLOC_001522	XLOC_001522	-	chr1:105764241-105764706	chr1	105764241	105764706	d8 Nkx2-5 EmGFP	CLK	OK	22.1165	0	#NAME?	#NAME?	0.0002	0.0131954	yes	22.1165	465
XLOC_001523	XLOC_001523	-	chr1:105933590-105934342	chr1	105933590	105934342	d8 Nkx2-5 EmGFP	CLK	NOTEST	0.0146095	0	#NAME?	0	1	1	no	0.0146095	752
XLOC_001524	XLOC_001524	-	chr1:105973569-105975769	chr1	105973569	105975769	d8 Nkx2-5 EmGFP	CLK	NOTEST	0.00819124	0.0289474	1.82128	0	1	1	no	0.0207562	2200
XLOC_001525	XLOC_001525	-	chr1:105975836-105976390	chr1	105975836	105976390	d8 Nkx2-5 EmGFP	CLK	NOTEST	0.0450052	0	#NAME?	0	1	1	no	0.0450052	554
XLOC_001526	XLOC_001526	-	chr1:106037182-106040498	chr1	106037182	106040498	d8 Nkx2-5 EmGFP	CLK	NOTEST	0.0131721	0.0289411	1.13563	0	1	1	no	0.015769	3316
XLOC_001527	XLOC_001527	-	chr1:106764083-106766369	chr1	106764083	106766369	d8 Nkx2-5 EmGFP	CLK	OK	0.345641	0.107949	-1.67892	-0.868685	0.4982	0.825443	no	0.237692	2286
XLOC_001528	XLOC_001528	-	chr1:106824754-106825989	chr1	106824754	106825989	d8 Nkx2-5 EmGFP	CLK	NOTEST	0	0	0	0	1	1	no	0	1235
XLOC_001529	XLOC_001529	-	chr1:106828686-106831523	chr1	106828686	106831523	d8 Nkx2-5 EmGFP	CLK	NOTEST	0.0124431	0	#NAME?	0	1	1	no	0.0124431	2837
XLOC_001530	XLOC_001530	-	chr1:111805198-111805334	chr1	111805198	111805334	d8 Nkx2-5 EmGFP	CLK	OK	240.283	0	#NAME?	#NAME?	0.0045	0.11051	no	240.283	136
XLOC_001531	XLOC_001531	-	chr1:111833768-111834152	chr1	111833768	111834152	d8 Nkx2-5 EmGFP	CLK	OK	0.208464	0.334264	0.681185	0.58213	0.79005	0.947934	no	0.1258	384
XLOC_001532	XLOC_001532	-	chr1:113915790-113916914	chr1	113915790	113916914	d8 Nkx2-5 EmGFP	CLK	NOTEST	0	0.0901091	inf	0	1	1	no	0.0901091	1124
XLOC_001533	XLOC_001533	-	chr1:113917449-113918303	chr1	113917449	113918303	d8 Nkx2-5 EmGFP	CLK	OK	0	0.107364	inf	#NAME?	0.049	0.270019	no	0.107364	854
XLOC_001534	XLOC_001534	-	chr1:113918487-113919117	chr1	113918487	113919117	d8 Nkx2-5 EmGFP	CLK	OK	0	0.147562	inf	#NAME?	0.0549	0.28546	no	0.147562	630
XLOC_001535	XLOC_001535	-	chr1:113924153-113924978	chr1	113924153	113924978	d8 Nkx2-5 EmGFP	CLK	OK	0	0.122494	inf	#NAME?	0.0476	0.270019	no	0.122494	825
XLOC_001536	XLOC_001536	-	chr1:113930924-113931116	chr1	113930924	113931116	d8 Nkx2-5 EmGFP	CLK	OK	0	2.54999	inf	#NAME?	0.0549	0.28546	no	2.54999	192
XLOC_001537	XLOC_001537	-	chr1:113933736-113934865	chr1	113933736	113934865	d8 Nkx2-5 EmGFP	CLK	OK	0	0.1241	inf	#NAME?	0.03255	0.255134	no	0.1241	1129
XLOC_001538	XLOC_001538	-	chr1:113938070-113940628	chr1	113938070	113940628	d8 Nkx2-5 EmGFP	CLK	OK	0	0.120103	inf	#NAME?	0.0155	0.205065	no	0.120103	2558
XLOC_001539	XLOC_001539	-	chr1:113942964-113944163	chr1	113942964	113944163	d8 Nkx2-5 EmGFP	CLK	OK	0.00815048	0.134715	4.04688	1.95485	0.3369	0.725348	no	0.126565	1199
XLOC_001540	XLOC_001540	-	chr1:113945268-113946617	chr1	113945268	113946617	d8 Nkx2-5 EmGFP	CLK	OK	0	0.22332	inf	#NAME?	0.01705	0.211626	no	0.22332	1349
XLOC_001541	XLOC_001541	-	chr1:113953072-113954112	chr1	113953072	113954112	d8 Nkx2-5 EmGFP	CLK	OK	0	0.121895	inf	#NAME?	0.03895	0.255134	no	0.121895	1040
XLOC_001542	XLOC_001542	-	chr1:113954567-113955537	chr1	113954567	113955537	d8 Nkx2-5 EmGFP	CLK	NOTEST	0	0.091347	inf	0	1	1	no	0.091347	970
XLOC_001543	XLOC_001543	-	chr1:116583482-116584639	chr1	116583482	116584639	d8 Nkx2-5 EmGFP	CLK	OK	0.153067	0	#NAME?	#NAME?	0.0251	0.239279	no	0.153067	1157
XLOC_001544	XLOC_001544	-	chr1:116585106-116586267	chr1	116585106	116586267	d8 Nkx2-5 EmGFP	CLK	OK	0.194782	0	#NAME?	#NAME?	0.0233	0.23684	no	0.194782	1161
XLOC_001545	XLOC_001545	-	chr1:116586322-116587294	chr1	116586322	116587294	d8 Nkx2-5 EmGFP	CLK	OK	0.136633	0	#NAME?	#NAME?	0.0361	0.255134	no	0.136633	972
XLOC_001546	XLOC_001546	-	chr1:118121143-118122112	chr1	118121143	118122112	d8 Nkx2-5 EmGFP	CLK	OK	0	0.141355	inf	#NAME?	0.0364	0.255134	no	0.141355	969
XLOC_001547	XLOC_001547	-	chr1:118293002-118293709	chr1	118293002	118293709	d8 Nkx2-5 EmGFP	CLK	NOTEST	0.0317519	0	#NAME?	0	1	1	no	0.0317519	707
XLOC_001548	XLOC_001548	-	chr1:119108208-119109297	chr1	119108208	119109297	d8 Nkx2-5 EmGFP	CLK	NOTEST	0	0.0432123	inf	0	1	1	no	0.0432123	1089
XLOC_001549	XLOC_001549	-	chr1:119113232-119120516	chr1	119113232	119120516	d8 Nkx2-5 EmGFP	CLK	NOTEST	0.0011613	0.0145685	3.64904	0	1	1	no	0.0134072	7284
XLOC_001550	XLOC_001550	-	chr1:119445267-119445734	chr1	119445267	119445734	d8 Nkx2-5 EmGFP	CLK	OK	0	0.352162	inf	#NAME?	0.0413	0.255134	no	0.352162	467
XLOC_001551	XLOC_001551	-	chr1:119523482-119524104	chr1	119523482	119524104	d8 Nkx2-5 EmGFP	CLK	NOTEST	0.0759322	0	#NAME?	0	1	1	no	0.0759322	622
XLOC_001552	XLOC_001552	-	chr1:119531940-119532596	chr1	119531940	119532596	d8 Nkx2-5 EmGFP	CLK	OK	0	0.139289	inf	#NAME?	0.0549	0.28546	no	0.139289	656
XLOC_001553	XLOC_001553	-	chr1:120082133-120083453	chr1	120082133	120083453	d8 Nkx2-5 EmGFP	CLK	OK	0	0.0973521	inf	#NAME?	0.0364	0.255134	no	0.0973521	1320
XLOC_001554	XLOC_001554	-	chr1:120288673-120289665	chr1	120288673	120289665	d8 Nkx2-5 EmGFP	CLK	OK	0	0.145364	inf	#NAME?	0.03255	0.255134	no	0.145364	992
XLOC_001555	XLOC_001555	-	chr1:120290390-120291007	chr1	120290390	120291007	d8 Nkx2-5 EmGFP	CLK	OK	0	0.182492	inf	#NAME?	0.0476	0.270019	no	0.182492	617
XLOC_001556	XLOC_001556	-	chr1:120298295-120298823	chr1	120298295	120298823	d8 Nkx2-5 EmGFP	CLK	OK	0	0.25002	inf	#NAME?	0.04105	0.255134	no	0.25002	528
XLOC_001557	XLOC_001557	-	chr1:120306825-120307779	chr1	120306825	120307779	d8 Nkx2-5 EmGFP	CLK	OK	0	0.144139	inf	#NAME?	0.0364	0.255134	no	0.144139	954
XLOC_001558	XLOC_001558	-	chr1:121895151-121896415	chr1	121895151	121896415	d8 Nkx2-5 EmGFP	CLK	OK	0	0.162698	inf	#NAME?	0.02495	0.239279	no	0.162698	1264
XLOC_001559	XLOC_001559	-	chr1:131050068-131051050	chr1	131050068	131051050	d8 Nkx2-5 EmGFP	CLK	OK	0.38398	0.0817807	-2.2312	-1.25235	0.4168	0.775255	no	0.302199	982
XLOC_001560	XLOC_001560	-	chr1:131630763-131631253	chr1	131630763	131631253	d8 Nkx2-5 EmGFP	CLK	OK	0.626698	1.53899	1.29614	0.981716	0.59495	0.874296	no	0.912292	490
XLOC_001561	XLOC_001561	-	chr1:131632427-131632851	chr1	131632427	131632851	d8 Nkx2-5 EmGFP	CLK	OK	0.86932	0	#NAME?	#NAME?	0.02035	0.22635	no	0.86932	424
XLOC_001562	XLOC_001562	-	chr1:131938718-131939436	chr1	131938718	131939436	d8 Nkx2-5 EmGFP	CLK	OK	0	0.122861	inf	#NAME?	0.0549	0.28546	no	0.122861	718
XLOC_001563	XLOC_001563	-	chr1:132188247-132190479	chr1	132188247	132190479	d8 Nkx2-5 EmGFP	CLK	OK	0.032252	0.177291	2.45866	1.22262	0.37345	0.74852	no	0.145039	2232
XLOC_001564	XLOC_001564	-	chr1:133612588-133613714	chr1	133612588	133613714	d8 Nkx2-5 EmGFP	CLK	NOTEST	0	0.0138332	inf	0	1	1	no	0.0138332	1126
XLOC_001565	XLOC_001565	-	chr1:133980056-133981427	chr1	133980056	133981427	d8 Nkx2-5 EmGFP	CLK	OK	0.00696552	0.372557	5.74109	2.77551	0.2813	0.681153	no	0.365591	1371
XLOC_001566	XLOC_001566	-	chr1:134454555-134455355	chr1	134454555	134455355	d8 Nkx2-5 EmGFP	CLK	OK	0.0403912	0.127534	1.65877	0.925778	0.5582	0.856866	no	0.0871428	800
XLOC_001567	XLOC_001567	-	chr1:135434579-135688237	chr1	135434579	135688237	d8 Nkx2-5 EmGFP	CLK	OK	1.53301	0.037785	-5.34241	-0.0815118	0.1704	0.562003	no	1.49523	253658
XLOC_001568	XLOC_001568	-	chr1:135688293-135691882	chr1	135688293	135691882	d8 Nkx2-5 EmGFP	CLK	NOTEST	0.058151	0.0133075	-2.12757	0	1	1	no	0.0448435	3589
XLOC_001569	XLOC_001569	-	chr1:135719441-135720380	chr1	135719441	135720380	d8 Nkx2-5 EmGFP	CLK	OK	0.318188	0.224877	-0.500745	-0.290103	0.8425	0.961098	no	0.093311	939
XLOC_001570	XLOC_001570	-	chr1:135865456-135866804	chr1	135865456	135866804	d8 Nkx2-5 EmGFP	CLK	OK	0.15628	0	#NAME?	#NAME?	0.0225	0.234004	no	0.15628	1348
XLOC_001571	XLOC_001571	-	chr1:136050326-136051843	chr1	136050326	136051843	d8 Nkx2-5 EmGFP	CLK	OK	0.229413	0.116997	-0.97147	-0.507601	0.70235	0.91941	no	0.112416	1517
XLOC_001572	XLOC_001572	-	chr1:136570795-136571376	chr1	136570795	136571376	d8 Nkx2-5 EmGFP	CLK	OK	0	0.232608	inf	#NAME?	0.04125	0.255134	no	0.232608	581
XLOC_001573	XLOC_001573	-	chr1:136573401-136574150	chr1	136573401	136574150	d8 Nkx2-5 EmGFP	CLK	OK	0	0.116017	inf	#NAME?	0.0549	0.28546	no	0.116017	749
XLOC_001574	XLOC_001574	-	chr1:136579012-136579560	chr1	136579012	136579560	d8 Nkx2-5 EmGFP	CLK	OK	0	0.217844	inf	#NAME?	0.0476	0.270019	no	0.217844	548
XLOC_001575	XLOC_001575	-	chr1:136583268-136584167	chr1	136583268	136584167	d8 Nkx2-5 EmGFP	CLK	OK	0	0.164497	inf	#NAME?	0.03255	0.255134	no	0.164497	899
XLOC_001576	XLOC_001576	-	chr1:136587354-136588137	chr1	136587354	136588137	d8 Nkx2-5 EmGFP	CLK	OK	0	0.174941	inf	#NAME?	0.03895	0.255134	no	0.174941	783
XLOC_001577	XLOC_001577	-	chr1:136590132-136590896	chr1	136590132	136590896	d8 Nkx2-5 EmGFP	CLK	OK	0	0.135567	inf	#NAME?	0.0476	0.270019	no	0.135567	764
XLOC_001578	XLOC_001578	-	chr1:136729925-136731738	chr1	136729925	136731738	d8 Nkx2-5 EmGFP	CLK	OK	0.00507097	0.223131	5.45948	2.52489	0.28775	0.687166	no	0.21806	1813
XLOC_001579	XLOC_001579	-	chr1:136732800-136734096	chr1	136732800	136734096	d8 Nkx2-5 EmGFP	CLK	OK	0.00743699	0.122874	4.04632	1.92744	0.3369	0.725348	no	0.115437	1296
XLOC_001580	XLOC_001580	-	chr1:136737139-136737997	chr1	136737139	136737997	d8 Nkx2-5 EmGFP	CLK	OK	0	0.106719	inf	#NAME?	0.049	0.270019	no	0.106719	858
XLOC_001581	XLOC_001581	-	chr1:136740444-136741429	chr1	136740444	136741429	d8 Nkx2-5 EmGFP	CLK	OK	0	0.171089	inf	#NAME?	0.02735	0.245204	no	0.171089	985
XLOC_001582	XLOC_001582	-	chr1:136743926-136745350	chr1	136743926	136745350	d8 Nkx2-5 EmGFP	CLK	OK	0	0.131075	inf	#NAME?	0.0263	0.24092	no	0.131075	1424
XLOC_001583	XLOC_001583	-	chr1:136776162-136776883	chr1	136776162	136776883	d8 Nkx2-5 EmGFP	CLK	OK	0.0309181	0.23211	2.90829	1.66742	0.38035	0.752693	no	0.201192	721
XLOC_001584	XLOC_001584	-	chr1:136793024-136793843	chr1	136793024	136793843	d8 Nkx2-5 EmGFP	CLK	OK	18.5429	0.113361	-7.35379	-4.95771	0.0976	0.414265	no	18.4295	819
XLOC_001585	XLOC_001585	-	chr1:138619903-138620451	chr1	138619903	138620451	d8 Nkx2-5 EmGFP	CLK	NOTEST	0	0	0	0	1	1	no	0	548
XLOC_001586	XLOC_001586	-	chr1:139928050-139929655	chr1	139928050	139929655	d8 Nkx2-5 EmGFP	CLK	OK	30.7455	0.00457119	-12.7155	-5.61188	0.25055	0.656973	no	30.7409	1605
XLOC_001587	XLOC_001587	-	chr1:140047780-140048279	chr1	140047780	140048279	d8 Nkx2-5 EmGFP	CLK	OK	14.2377	0	#NAME?	#NAME?	5e-05	0.00396813	yes	14.2377	499
XLOC_001588	XLOC_001588	-	chr1:141356849-141357096	chr1	141356849	141357096	d8 Nkx2-5 EmGFP	CLK	OK	0.593287	0	#NAME?	#NAME?	0.0744	0.349616	no	0.593287	247
XLOC_001589	XLOC_001589	-	chr1:143093492-143093753	chr1	143093492	143093753	d8 Nkx2-5 EmGFP	CLK	OK	518.266	0	#NAME?	#NAME?	5e-05	0.00396813	yes	518.266	261
XLOC_001590	XLOC_001590	-	chr1:143094090-143094614	chr1	143094090	143094614	d8 Nkx2-5 EmGFP	CLK	OK	399.864	0	#NAME?	#NAME?	5e-05	0.00396813	yes	399.864	524
XLOC_001591	XLOC_001591	-	chr1:144312248-144312414	chr1	144312248	144312414	d8 Nkx2-5 EmGFP	CLK	OK	1819.82	0	#NAME?	#NAME?	5e-05	0.00396813	yes	1819.82	166
XLOC_001592	XLOC_001592	-	chr1:146420568-146420675	chr1	146420568	146420675	d8 Nkx2-5 EmGFP	CLK	OK	1476.28	0	#NAME?	#NAME?	0.0369	0.255134	no	1476.28	107
XLOC_001593	XLOC_001593	-	chr1:150264908-150266076	chr1	150264908	150266076	d8 Nkx2-5 EmGFP	CLK	OK	79.6181	0.0132377	-12.5542	-7.19268	0.23145	0.640287	no	79.6049	1168
XLOC_001594	XLOC_001594	-	chr1:150268687-150269437	chr1	150268687	150269437	d8 Nkx2-5 EmGFP	CLK	OK	22.1241	0.0115809	-10.8997	-5.54589	0.25055	0.656973	no	22.1125	750
XLOC_001595	XLOC_001595	-	chr1:150549358-150549676	chr1	150549358	150549676	d8 Nkx2-5 EmGFP	CLK	OK	4.12244	0	#NAME?	#NAME?	0.0073	0.140738	no	4.12244	318
XLOC_001596	XLOC_001596	-	chr1:151296142-151297676	chr1	151296142	151297676	d8 Nkx2-5 EmGFP	CLK	OK	0.189783	0	#NAME?	#NAME?	0.01595	0.207337	no	0.189783	1534
XLOC_001597	XLOC_001597	-	chr1:151336602-151338504	chr1	151336602	151338504	d8 Nkx2-5 EmGFP	CLK	OK	0.086538	0.00755409	-3.518	-1.58878	0.3392	0.726508	no	0.0789839	1902
XLOC_001598	XLOC_001598	-	chr1:151339231-151339962	chr1	151339231	151339962	d8 Nkx2-5 EmGFP	CLK	OK	0.257965	0	#NAME?	#NAME?	0.03065	0.253185	no	0.257965	731
XLOC_001599	XLOC_001599	-	chr1:151520597-151520762	chr1	151520597	151520762	d8 Nkx2-5 EmGFP	CLK	OK	296.077	0	#NAME?	#NAME?	0.0006	0.0316346	yes	296.077	165
XLOC_001600	XLOC_001600	-	chr1:152779289-152779686	chr1	152779289	152779686	d8 Nkx2-5 EmGFP	CLK	OK	0.0391675	0.344971	3.13875	2.42086	0.4053	0.768603	no	0.305804	397
XLOC_001601	XLOC_001601	-	chr1:153378763-153387200	chr1	153378763	153387200	d8 Nkx2-5 EmGFP	CLK	OK	0	0.149234	inf	#NAME?	0.12125	0.470001	no	0.149234	8437
XLOC_001602	XLOC_001602	-	chr1:153587981-153589312	chr1	153587981	153589312	d8 Nkx2-5 EmGFP	CLK	NOTEST	0	0.0170138	inf	0	1	1	no	0.0170138	1331
XLOC_001603	XLOC_001603	-	chr1:153619521-153620727	chr1	153619521	153620727	d8 Nkx2-5 EmGFP	CLK	OK	7.91636	0	#NAME?	#NAME?	5e-05	0.00396813	yes	7.91636	1206
XLOC_001604	XLOC_001604	-	chr1:155207032-155207746	chr1	155207032	155207746	d8 Nkx2-5 EmGFP	CLK	OK	0.234971	0.111423	-1.07644	-0.649974	0.67205	0.906333	no	0.123548	714
XLOC_001605	XLOC_001605	-	chr1:155210040-155211396	chr1	155210040	155211396	d8 Nkx2-5 EmGFP	CLK	OK	0.169319	0	#NAME?	#NAME?	0.02165	0.231763	no	0.169319	1356
XLOC_001606	XLOC_001606	-	chr1:155212481-155244629	chr1	155212481	155244629	d8 Nkx2-5 EmGFP	CLK	OK	2.74096	0.0801398	-5.09602	-0.153254	0.11215	0.450271	no	2.66082	32148
XLOC_001607	XLOC_001607	-	chr1:155212481-155244629	chr1	155212481	155244629	d8 Nkx2-5 EmGFP	CLK	OK	2.01723	0	#NAME?	#NAME?	0.025	0.239279	no	2.01723	32148
XLOC_001608	XLOC_001608	-	chr1:155244747-155245605	chr1	155244747	155245605	d8 Nkx2-5 EmGFP	CLK	OK	0.184475	0.00970171	-4.24904	-1.89987	0.3413	0.728202	no	0.174773	858
XLOC_001609	XLOC_001609	-	chr1:155698041-155699352	chr1	155698041	155699352	d8 Nkx2-5 EmGFP	CLK	NOTEST	0	0	0	0	1	1	no	0	1311
XLOC_001610	XLOC_001610	-	chr1:156333201-156376513	chr1	156333201	156376513	d8 Nkx2-5 EmGFP	CLK	OK	1019.42	0.684547	-10.5403	-6.06651	0.04265	0.260038	no	1018.74	43312
XLOC_001611	XLOC_001611	-	chr1:156523972-156526670	chr1	156523972	156526670	d8 Nkx2-5 EmGFP	CLK	OK	23.1257	0	#NAME?	#NAME?	5e-05	0.00396813	yes	23.1257	2698
XLOC_001612	XLOC_001612	-	chr1:156557988-156558654	chr1	156557988	156558654	d8 Nkx2-5 EmGFP	CLK	OK	0.172371	0.0681745	-1.33821	-0.801781	0.62065	0.88556	no	0.104196	666
XLOC_001613	XLOC_001613	-	chr1:156793529-156793994	chr1	156793529	156793994	d8 Nkx2-5 EmGFP	CLK	OK	45.0048	0	#NAME?	#NAME?	5e-05	0.00396813	yes	45.0048	465
XLOC_001614	XLOC_001614	-	chr1:156942509-156943009	chr1	156942509	156943009	d8 Nkx2-5 EmGFP	CLK	OK	0	0.419502	inf	#NAME?	0.02955	0.250203	no	0.419502	500
XLOC_001615	XLOC_001615	-	chr1:157130414-157131347	chr1	157130414	157131347	d8 Nkx2-5 EmGFP	CLK	OK	0.0110603	0.113349	3.35731	1.70481	0.38655	0.75603	no	0.102289	933
XLOC_001616	XLOC_001616	-	chr1:157132180-157133087	chr1	157132180	157133087	d8 Nkx2-5 EmGFP	CLK	OK	0.0114603	0.216874	4.24215	2.18838	0.3286	0.719148	no	0.205414	907
XLOC_001617	XLOC_001617	-	chr1:157622243-157622520	chr1	157622243	157622520	d8 Nkx2-5 EmGFP	CLK	OK	12.9858	0	#NAME?	#NAME?	0.00415	0.105239	no	12.9858	277
XLOC_001618	XLOC_001618	-	chr1:159351219-159353266	chr1	159351219	159353266	d8 Nkx2-5 EmGFP	CLK	OK	0.168442	0.0139269	-3.5963	-1.74066	0.28825	0.687392	no	0.154515	2047
XLOC_001619	XLOC_001619	-	chr1:161225762-161227398	chr1	161225762	161227398	d8 Nkx2-5 EmGFP	CLK	NOTEST	0.0113816	0.00447303	-1.34738	0	1	1	no	0.00690857	1636
XLOC_001620	XLOC_001620	-	chr1:161231771-161232600	chr1	161231771	161232600	d8 Nkx2-5 EmGFP	CLK	NOTEST	0	0.0304311	inf	0	1	1	no	0.0304311	829
XLOC_001621	XLOC_001621	-	chr1:161234391-161235663	chr1	161234391	161235663	d8 Nkx2-5 EmGFP	CLK	NOTEST	0.00760163	0.0119624	0.654128	0	1	1	no	0.00436077	1272
XLOC_001622	XLOC_001622	-	chr1:163235518-163237412	chr1	163235518	163237412	d8 Nkx2-5 EmGFP	CLK	NOTEST	0.00483021	0	#NAME?	0	1	1	no	0.00483021	1894
XLOC_001623	XLOC_001623	-	chr1:163237604-163240186	chr1	163237604	163240186	d8 Nkx2-5 EmGFP	CLK	NOTEST	0.0103263	0	#NAME?	0	1	1	no	0.0103263	2582
XLOC_001624	XLOC_001624	-	chr1:163240564-163242152	chr1	163240564	163242152	d8 Nkx2-5 EmGFP	CLK	NOTEST	0	0	0	0	1	1	no	0	1588
XLOC_001625	XLOC_001625	-	chr1:164307487-164464481	chr1	164307487	164464481	d8 Nkx2-5 EmGFP	CLK	OK	0.0285345	0.112579	1.98016	0.0309933	0.02645	0.241673	no	0.0840445	156994
XLOC_001626	XLOC_001626	-	chr1:165642233-165643240	chr1	165642233	165643240	d8 Nkx2-5 EmGFP	CLK	OK	0.201222	0	#NAME?	#NAME?	0.02535	0.239279	no	0.201222	1007
XLOC_001627	XLOC_001627	-	chr1:166377565-166378939	chr1	166377565	166378939	d8 Nkx2-5 EmGFP	CLK	OK	0.104219	0.0218595	-2.25328	-1.12737	0.457	0.799391	no	0.0823595	1374
XLOC_001628	XLOC_001628	-	chr1:167496216-167497088	chr1	167496216	167497088	d8 Nkx2-5 EmGFP	CLK	OK	0	0.10452	inf	#NAME?	0.049	0.270019	no	0.10452	872
XLOC_001629	XLOC_001629	-	chr1:170982312-170982920	chr1	170982312	170982920	d8 Nkx2-5 EmGFP	CLK	OK	0	0.388417	inf	#NAME?	0.0263	0.24092	no	0.388417	608
XLOC_001630	XLOC_001630	-	chr1:170986118-170986431	chr1	170986118	170986431	d8 Nkx2-5 EmGFP	CLK	OK	0	0.774623	inf	#NAME?	0.0413	0.255134	no	0.774623	313
XLOC_001631	XLOC_001631	-	chr1:171063702-171064238	chr1	171063702	171064238	d8 Nkx2-5 EmGFP	CLK	OK	0	0.187859	inf	#NAME?	0.0549	0.28546	no	0.187859	536
XLOC_001632	XLOC_001632	-	chr1:171500440-171503148	chr1	171500440	171503148	d8 Nkx2-5 EmGFP	CLK	OK	0.00981004	0.0872731	3.15321	1.47473	0.33115	0.72135	no	0.0774631	2708
XLOC_001633	XLOC_001633	-	chr1:171679349-171679624	chr1	171679349	171679624	d8 Nkx2-5 EmGFP	CLK	OK	2.8049	0	#NAME?	#NAME?	0.01655	0.208363	no	2.8049	275
XLOC_001634	XLOC_001634	-	chr1:172206905-172207424	chr1	172206905	172207424	d8 Nkx2-5 EmGFP	CLK	OK	0.24873	0	#NAME?	#NAME?	0.04475	0.265051	no	0.24873	519
XLOC_001635	XLOC_001635	-	chr1:175915119-175917729	chr1	175915119	175917729	d8 Nkx2-5 EmGFP	CLK	OK	0.115679	0.00534182	-4.43665	-1.96303	0.2938	0.692262	no	0.110337	2610
XLOC_001636	XLOC_001636	-	chr1:175920271-175921686	chr1	175920271	175921686	d8 Nkx2-5 EmGFP	CLK	OK	0.181325	0	#NAME?	#NAME?	0.01815	0.214311	no	0.181325	1415
XLOC_001637	XLOC_001637	-	chr1:177701349-177702648	chr1	177701349	177702648	d8 Nkx2-5 EmGFP	CLK	NOTEST	0	0.00583527	inf	0	1	1	no	0.00583527	1299
XLOC_001638	XLOC_001638	-	chr1:177983749-177986294	chr1	177983749	177986294	d8 Nkx2-5 EmGFP	CLK	OK	0.164319	0.0603835	-1.44427	-0.714014	0.56685	0.860816	no	0.103935	2545
XLOC_001639	XLOC_001639	-	chr1:177989592-177990299	chr1	177989592	177990299	d8 Nkx2-5 EmGFP	CLK	OK	0.269891	0	#NAME?	#NAME?	0.03065	0.253185	no	0.269891	707
XLOC_001640	XLOC_001640	-	chr1:178143507-178144070	chr1	178143507	178144070	d8 Nkx2-5 EmGFP	CLK	OK	1.03231	0	#NAME?	#NAME?	0.0094	0.159784	no	1.03231	563
XLOC_001641	XLOC_001641	-	chr1:178277629-178279263	chr1	178277629	178279263	d8 Nkx2-5 EmGFP	CLK	OK	0	0.183648	inf	#NAME?	0.0155	0.205065	no	0.183648	1634
XLOC_001642	XLOC_001642	-	chr1:178299286-178300377	chr1	178299286	178300377	d8 Nkx2-5 EmGFP	CLK	OK	13.2681	0.0215581	-9.26552	-5.35036	0.2049	0.611734	no	13.2465	1091
XLOC_001643	XLOC_001643	-	chr1:178314759-178315443	chr1	178314759	178315443	d8 Nkx2-5 EmGFP	CLK	NOTEST	0.0498356	0.0262715	-0.92368	0	1	1	no	0.0235641	684
XLOC_001644	XLOC_001644	-	chr1:178527284-178528051	chr1	178527284	178528051	d8 Nkx2-5 EmGFP	CLK	OK	0.156541	0.0112383	-3.80005	-1.75739	0.36495	0.743476	no	0.145303	767
XLOC_001645	XLOC_001645	-	chr1:178528142-178528838	chr1	178528142	178528838	d8 Nkx2-5 EmGFP	CLK	OK	0.551467	0.0384683	-3.84153	-2.2468	0.28835	0.687392	no	0.512999	696
XLOC_001646	XLOC_001646	-	chr1:179847406-179850322	chr1	179847406	179850322	d8 Nkx2-5 EmGFP	CLK	NOTEST	0.0211448	0.0118541	-0.834917	0	1	1	no	0.0092907	2916
XLOC_001647	XLOC_001647	-	chr1:179958667-179959617	chr1	179958667	179959617	d8 Nkx2-5 EmGFP	CLK	OK	0.205459	0.0767116	-1.42133	-0.79341	0.59445	0.874179	no	0.128747	950
XLOC_001648	XLOC_001648	-	chr1:180639856-180640885	chr1	180639856	180640885	d8 Nkx2-5 EmGFP	CLK	OK	0.293937	0.115779	-1.34413	-0.754533	0.5943	0.874086	no	0.178158	1029
XLOC_001649	XLOC_001649	-	chr1:180758107-180759131	chr1	180758107	180759131	d8 Nkx2-5 EmGFP	CLK	OK	0.118278	0.00776501	-3.92905	-1.67793	0.35475	0.737187	no	0.110513	1024
XLOC_001650	XLOC_001650	-	chr1:180762604-180763588	chr1	180762604	180763588	d8 Nkx2-5 EmGFP	CLK	OK	0.196684	0.122361	-0.684732	-0.383097	0.7865	0.946789	no	0.074323	984
XLOC_001651	XLOC_001651	-	chr1:180777289-180778242	chr1	180777289	180778242	d8 Nkx2-5 EmGFP	CLK	OK	0.301594	0.0254697	-3.56575	-1.90384	0.3094	0.704894	no	0.276124	953
XLOC_001652	XLOC_001652	-	chr1:180790371-180792202	chr1	180790371	180792202	d8 Nkx2-5 EmGFP	CLK	OK	0.180555	0.039407	-2.19591	-1.11396	0.4197	0.777004	no	0.141148	1831
XLOC_001653	XLOC_001653	-	chr1:180814206-180816463	chr1	180814206	180816463	d8 Nkx2-5 EmGFP	CLK	OK	0.234985	0.0469137	-2.32448	-1.17473	0.3739	0.74852	no	0.188071	2257
XLOC_001654	XLOC_001654	-	chr1:180877350-180885619	chr1	180877350	180885619	d8 Nkx2-5 EmGFP	CLK	OK	0	0.114955	inf	#NAME?	0.2227	0.633377	no	0.114955	8269
XLOC_001655	XLOC_001655	-	chr1:180877350-180885619	chr1	180877350	180885619	d8 Nkx2-5 EmGFP	CLK	OK	0	0.306312	inf	#NAME?	0.2207	0.631153	no	0.306312	8269
XLOC_001656	XLOC_001656	-	chr1:181211990-181234936	chr1	181211990	181234936	d8 Nkx2-5 EmGFP	CLK	NOTEST	0	0.0380025	inf	0	1	1	no	0.0380025	22946
XLOC_001657	XLOC_001657	-	chr1:181211990-181234936	chr1	181211990	181234936	d8 Nkx2-5 EmGFP	CLK	NOTEST	0.0160008	0.0219889	0.458638	0	1	1	no	0.0059881	22946
XLOC_001658	XLOC_001658	-	chr1:181211990-181234936	chr1	181211990	181234936	d8 Nkx2-5 EmGFP	CLK	NOTEST	0.0144946	0.0171039	0.238811	0	1	1	no	0.0026093	22946
XLOC_001659	XLOC_001659	-	chr1:181211990-181234936	chr1	181211990	181234936	d8 Nkx2-5 EmGFP	CLK	NOTEST	0.0610842	0	#NAME?	0	1	1	no	0.0610842	22946
XLOC_001660	XLOC_001660	-	chr1:181282069-181282911	chr1	181282069	181282911	d8 Nkx2-5 EmGFP	CLK	OK	6.09801	0	#NAME?	#NAME?	0.00035	0.0207242	yes	6.09801	842
XLOC_001661	XLOC_001661	-	chr1:181283125-181283933	chr1	181283125	181283933	d8 Nkx2-5 EmGFP	CLK	OK	6.69818	0	#NAME?	#NAME?	0.0002	0.0131954	yes	6.69818	808
XLOC_001662	XLOC_001662	-	chr1:181889254-181889919	chr1	181889254	181889919	d8 Nkx2-5 EmGFP	CLK	OK	0	0.32793	inf	#NAME?	0.0247	0.239279	no	0.32793	665
XLOC_001663	XLOC_001663	-	chr1:181896567-181898436	chr1	181896567	181898436	d8 Nkx2-5 EmGFP	CLK	OK	0.803935	3.53557	2.13679	1.26208	0.3162	0.710738	no	2.73163	1869
XLOC_001664	XLOC_001664	-	chr1:181898536-181899500	chr1	181898536	181899500	d8 Nkx2-5 EmGFP	CLK	OK	0.913194	3.35591	1.87771	1.17097	0.4162	0.774852	no	2.44272	964
XLOC_001665	XLOC_001665	-	chr1:181899632-181901539	chr1	181899632	181901539	d8 Nkx2-5 EmGFP	CLK	OK	0.709465	2.70024	1.92829	1.11507	0.3845	0.754943	no	1.99077	1907
XLOC_001666	XLOC_001666	-	chr1:182367589-182369227	chr1	182367589	182369227	d8 Nkx2-5 EmGFP	CLK	NOTEST	0.00568296	0	#NAME?	0	1	1	no	0.00568296	1638
XLOC_001667	XLOC_001667	-	chr1:182371617-182372829	chr1	182371617	182372829	d8 Nkx2-5 EmGFP	CLK	NOTEST	0	0	0	0	1	1	no	0	1212
XLOC_001668	XLOC_001668	-	chr1:182375592-182376727	chr1	182375592	182376727	d8 Nkx2-5 EmGFP	CLK	NOTEST	0	0	0	0	1	1	no	0	1135
XLOC_001669	XLOC_001669	-	chr1:182978600-182980574	chr1	182978600	182980574	d8 Nkx2-5 EmGFP	CLK	OK	0.239921	0.0144976	-4.04867	-1.97086	0.2646	0.667505	no	0.225423	1974
XLOC_001670	XLOC_001670	-	chr1:183071479-183073002	chr1	183071479	183073002	d8 Nkx2-5 EmGFP	CLK	OK	0.141967	0.00970581	-3.87056	-1.79156	0.32495	0.7168	no	0.132261	1523
XLOC_001671	XLOC_001671	-	chr1:183413924-183414820	chr1	183413924	183414820	d8 Nkx2-5 EmGFP	CLK	OK	0.128021	0.0367109	-1.80211	-0.984954	0.53395	0.844211	no	0.0913101	896
XLOC_001672	XLOC_001672	-	chr1:183839663-183842357	chr1	183839663	183842357	d8 Nkx2-5 EmGFP	CLK	NOTEST	0	0	0	0	1	1	no	0	2694
XLOC_001673	XLOC_001673	-	chr1:183938430-183939151	chr1	183938430	183939151	d8 Nkx2-5 EmGFP	CLK	NOTEST	0	0	0	0	1	1	no	0	721
XLOC_001674	XLOC_001674	-	chr1:184722724-184724342	chr1	184722724	184724342	d8 Nkx2-5 EmGFP	CLK	OK	0.092199	0	#NAME?	#NAME?	0.03085	0.253185	no	0.092199	1618
XLOC_001675	XLOC_001675	-	chr1:185329464-185330997	chr1	185329464	185330997	d8 Nkx2-5 EmGFP	CLK	OK	0.300203	0.081884	-1.87428	-0.979317	0.4654	0.804705	no	0.218319	1533
XLOC_001676	XLOC_001676	-	chr1:186030914-186032275	chr1	186030914	186032275	d8 Nkx2-5 EmGFP	CLK	NOTEST	0	0.0607824	inf	0	1	1	no	0.0607824	1361
XLOC_001677	XLOC_001677	-	chr1:186048331-186049812	chr1	186048331	186049812	d8 Nkx2-5 EmGFP	CLK	OK	0.0509837	0.155344	1.60735	0.832901	0.5339	0.844207	no	0.10436	1481
XLOC_001678	XLOC_001678	-	chr1:186716620-186717422	chr1	186716620	186717422	d8 Nkx2-5 EmGFP	CLK	OK	0.0402597	0.222453	2.46609	1.38347	0.41315	0.772759	no	0.182193	802
XLOC_001679	XLOC_001679	-	chr1:186964798-186965147	chr1	186964798	186965147	d8 Nkx2-5 EmGFP	CLK	OK	0	0.405511	inf	#NAME?	0.0549	0.28546	no	0.405511	349
XLOC_001680	XLOC_001680	-	chr1:186966230-186966933	chr1	186966230	186966933	d8 Nkx2-5 EmGFP	CLK	OK	0.0159992	0.164411	3.36123	1.86241	0.3864	0.756005	no	0.148412	703
XLOC_001681	XLOC_001681	-	chr1:189726937-189728015	chr1	189726937	189728015	d8 Nkx2-5 EmGFP	CLK	NOTEST	0.018517	0.0218745	0.240402	0	1	1	no	0.0033575	1078
XLOC_001682	XLOC_001682	-	chr1:190551889-190552823	chr1	190551889	190552823	d8 Nkx2-5 EmGFP	CLK	NOTEST	0	0	0	0	1	1	no	0	934
XLOC_001683	XLOC_001683	-	chr1:191282418-191283290	chr1	191282418	191283290	d8 Nkx2-5 EmGFP	CLK	OK	0.192746	0	#NAME?	#NAME?	0.03085	0.253185	no	0.192746	872
XLOC_001684	XLOC_001684	-	chr1:191992846-191993131	chr1	191992846	191993131	d8 Nkx2-5 EmGFP	CLK	OK	0.879081	0	#NAME?	#NAME?	0.0409	0.255134	no	0.879081	285
XLOC_001685	XLOC_001685	-	chr1:192886164-192886749	chr1	192886164	192886749	d8 Nkx2-5 EmGFP	CLK	OK	0.041499	0.180904	2.12408	1.32325	0.4805	0.813985	no	0.139405	585
XLOC_001686	XLOC_001686	-	chr1:192888155-192889631	chr1	192888155	192889631	d8 Nkx2-5 EmGFP	CLK	OK	0.108761	0.0704284	-0.626931	-0.322205	0.80065	0.950373	no	0.0383326	1476
XLOC_001687	XLOC_001687	-	chr1:193052688-193052921	chr1	193052688	193052921	d8 Nkx2-5 EmGFP	CLK	OK	11.8246	0.944984	-3.64536	-6.9779	0.2294	0.639011	no	10.8796	233
XLOC_001688	XLOC_001688	-	chr1:193281376-193282306	chr1	193281376	193282306	d8 Nkx2-5 EmGFP	CLK	OK	0.233206	0	#NAME?	#NAME?	0.02605	0.24092	no	0.233206	930
XLOC_001689	XLOC_001689	Ppp1r14c	chr10:3366149-3464975	chr10	3366149	3464975	d8 Nkx2-5 EmGFP	CLK	OK	5.16464	1.56503	-1.72247	-1.25434	0.37715	0.750701	no	3.59961	98826
XLOC_001690	XLOC_001690	Iyd	chr10:3540278-3554877	chr10	3540278	3554877	d8 Nkx2-5 EmGFP	CLK	NOTEST	0.012038	0	#NAME?	0	1	1	no	0.012038	14599
XLOC_001691	XLOC_001691	Plekhg1	chr10:3740376-3967361	chr10	3740376	3967361	d8 Nkx2-5 EmGFP	CLK	OK	1.38296	2.97515	1.1052	0.722105	0.4828	0.815603	no	1.59219	226985
XLOC_001692	XLOC_001692	Mthfd1l	chr10:3973074-4167081	chr10	3973074	4167081	d8 Nkx2-5 EmGFP	CLK	OK	30.4054	83.3748	1.45528	1.25655	0.2246	0.634577	no	52.9694	194007
XLOC_001693	XLOC_001693	Akap12	chr10:4253891-4359472	chr10	4253891	4359472	d8 Nkx2-5 EmGFP	CLK	OK	29.8827	118.347	1.98564	1.71244	0.0967	0.412177	no	88.4643	105581
XLOC_001694	XLOC_001694	1700052N19Rik	chr10:4432604-4455140	chr10	4432604	4455140	d8 Nkx2-5 EmGFP	CLK	OK	9.61764	12.9358	0.427609	0.357592	0.77435	0.944073	no	3.31816	22536
XLOC_001695	XLOC_001695	Gm221	chr10:4509871-4562059	chr10	4509871	4562059	d8 Nkx2-5 EmGFP	CLK	OK	0.102912	0.131489	0.353525	0.166928	0.87665	0.970245	no	0.028577	52188
XLOC_001696	XLOC_001696	Esr1	chr10:4611850-5005615	chr10	4611850	5005615	d8 Nkx2-5 EmGFP	CLK	OK	0.194717	0.0050465	-5.26995	-1.77967	0.12035	0.468158	no	0.18967	393765
XLOC_001697	XLOC_001697	Myct1	chr10:5593727-5606791	chr10	5593727	5606791	d8 Nkx2-5 EmGFP	CLK	OK	1.75954	0.00291729	-9.23636	-4.20275	0.2517	0.657108	no	1.75662	13064
XLOC_001698	XLOC_001698	Vip	chr10:5639217-5647614	chr10	5639217	5647614	d8 Nkx2-5 EmGFP	CLK	NOTEST	0.0258119	0	#NAME?	0	1	1	no	0.0258119	8397
XLOC_001699	XLOC_001699	Oprm1	chr10:6788600-7038209	chr10	6788600	7038209	d8 Nkx2-5 EmGFP	CLK	NOTEST	0	0.00851905	inf	0	1	1	no	0.00851905	249609
XLOC_001700	XLOC_001700	-	chr10:7212323-7215564	chr10	7212323	7215564	d8 Nkx2-5 EmGFP	CLK	OK	0.417033	0.00963577	-5.43562	-2.43818	0.2925	0.691079	no	0.407397	3241
XLOC_001701	XLOC_001701	Lrp11	chr10:7589799-7625477	chr10	7589799	7625477	d8 Nkx2-5 EmGFP	CLK	OK	5.17582	14.4764	1.48385	0.966262	0.3508	0.734615	no	9.30058	35678
XLOC_001702	XLOC_001702	A630066F11Rik	chr10:7629372-7664623	chr10	7629372	7664623	d8 Nkx2-5 EmGFP	CLK	OK	0	0.71333	inf	#NAME?	0.0997	0.419362	no	0.71333	35251
XLOC_001703	XLOC_001703	Nup43	chr10:7667503-7716461	chr10	7667503	7716461	d8 Nkx2-5 EmGFP	CLK	OK	17.4532	76.0876	2.12417	1.4141	0.26655	0.66925	no	58.6344	48958
XLOC_001704	XLOC_001704	Lats1	chr10:7667503-7716461	chr10	7667503	7716461	d8 Nkx2-5 EmGFP	CLK	OK	6.07556	2.5898	-1.23017	-0.505086	0.60145	0.87689	no	3.48576	48958
XLOC_001705	XLOC_001705	Katna1	chr10:7725999-7763150	chr10	7725999	7763150	d8 Nkx2-5 EmGFP	CLK	OK	14.5464	24.5007	0.752158	0.639375	0.598	0.875768	no	9.9543	37151
XLOC_001706	XLOC_001706	Ppil4	chr10:7792893-7822563	chr10	7792893	7822563	d8 Nkx2-5 EmGFP	CLK	OK	6.66541	8.8948	0.416268	0.329248	0.779	0.945595	no	2.22939	29670
XLOC_001707	XLOC_001707	Zc3h12d	chr10:7832469-7870397	chr10	7832469	7870397	d8 Nkx2-5 EmGFP	CLK	NOTEST	0.0267337	0.0158911	-0.750438	0	1	1	no	0.0108426	37928
XLOC_001708	XLOC_001708	Mir5104	chr10:7832469-7870397	chr10	7832469	7870397	d8 Nkx2-5 EmGFP	CLK	NOTEST	0	0	0	0	1	1	no	0	37928
XLOC_001709	XLOC_001709	Gm6150	chr10:9684721-9691909	chr10	9684721	9691909	d8 Nkx2-5 EmGFP	CLK	NOTEST	0.0033518	0	#NAME?	0	1	1	no	0.0033518	7188
XLOC_001710	XLOC_001710	Gm5177	chr10:10605944-10616313	chr10	10605944	10616313	d8 Nkx2-5 EmGFP	CLK	NOTEST	0	0	0	0	1	1	no	0	10369
XLOC_001711	XLOC_001711	4930567K20Rik	chr10:10686058-11082331	chr10	10686058	11082331	d8 Nkx2-5 EmGFP	CLK	NOTEST	0	0	0	0	1	1	no	0	396273
XLOC_001712	XLOC_001712	Shprh	chr10:11149379-11217564	chr10	11149379	11217564	d8 Nkx2-5 EmGFP	CLK	OK	4.10283	5.01888	0.290747	0.210615	0.8331	0.958689	no	0.91605	68185
XLOC_001713	XLOC_001713	Fbxo30	chr10:11281323-11299242	chr10	11281323	11299242	d8 Nkx2-5 EmGFP	CLK	OK	7.24777	7.26417	0.0032608	0.00239889	0.99775	0.998953	no	0.0164	17919
XLOC_001714	XLOC_001714	Epm2a	chr10:11343444-11459643	chr10	11343444	11459643	d8 Nkx2-5 EmGFP	CLK	OK	3.79691	0.196758	-4.27033	-2.32878	0.0574	0.29442	no	3.60015	116199
XLOC_001715	XLOC_001715	Sf3b5	chr10:13008449-13009183	chr10	13008449	13009183	d8 Nkx2-5 EmGFP	CLK	OK	136.974	149.406	0.125343	0.136002	0.92255	0.980576	no	12.432	734
XLOC_001716	XLOC_001716	Plagl1	chr10:13090729-13131695	chr10	13090729	13131695	d8 Nkx2-5 EmGFP	CLK	OK	3.44948	0.107996	-4.99732	-2.69008	0.0255	0.239563	no	3.34148	40966
XLOC_001717	XLOC_001717	Fuca2	chr10:13501024-13517275	chr10	13501024	13517275	d8 Nkx2-5 EmGFP	CLK	OK	13.06	2.88224	-2.17989	-1.4928	0.1654	0.554777	no	10.1778	16251
XLOC_001718	XLOC_001718	Adat2	chr10:13523841-13567105	chr10	13523841	13567105	d8 Nkx2-5 EmGFP	CLK	OK	9.46472	20.6975	1.12883	0.623287	0.5576	0.856644	no	11.2328	43264
XLOC_001719	XLOC_001719	Hivep2	chr10:13965883-14151378	chr10	13965883	14151378	d8 Nkx2-5 EmGFP	CLK	OK	2.82921	1.1662	-1.27859	-0.853362	0.41155	0.772009	no	1.66301	185495
XLOC_001720	XLOC_001720	1700016L04Rik	chr10:14705608-14759019	chr10	14705608	14759019	d8 Nkx2-5 EmGFP	CLK	NOTEST	0	0	0	0	1	1	no	0	53411
XLOC_001721	XLOC_001721	Nmbr	chr10:14760288-14770556	chr10	14760288	14770556	d8 Nkx2-5 EmGFP	CLK	NOTEST	0.0288406	0.0153603	-0.908896	0	1	1	no	0.0134803	10268
XLOC_001722	XLOC_001722	Cited2	chr10:17722480-17725674	chr10	17722480	17725674	d8 Nkx2-5 EmGFP	CLK	OK	53.6203	28.1007	-0.932172	-0.744716	0.4788	0.813287	no	25.5196	3194
XLOC_001723	XLOC_001723	Txlnb	chr10:17796218-17845663	chr10	17796218	17845663	d8 Nkx2-5 EmGFP	CLK	OK	0.549551	0.151708	-1.85695	-0.928509	0.4115	0.772009	no	0.397843	49445
XLOC_001724	XLOC_001724	Reps1	chr10:18055939-18125155	chr10	18055939	18125155	d8 Nkx2-5 EmGFP	CLK	OK	22.9351	29.8519	0.380264	0.306473	0.76415	0.94132	no	6.9168	69216
XLOC_001725	XLOC_001725	Nhsl1	chr10:18318557-18533894	chr10	18318557	18533894	d8 Nkx2-5 EmGFP	CLK	OK	2.886	4.14557	0.522498	0.368422	0.71065	0.922792	no	1.25957	215337
XLOC_001726	XLOC_001726	Perp	chr10:18845070-18857072	chr10	18845070	18857072	d8 Nkx2-5 EmGFP	CLK	OK	6.77339	34.7198	2.35781	2.17715	0.14025	0.506087	no	27.9464	12002
XLOC_001727	XLOC_001727	Gm20139	chr10:19141748-19207947	chr10	19141748	19207947	d8 Nkx2-5 EmGFP	CLK	NOTEST	0	0	0	0	1	1	no	0	66199
XLOC_001728	XLOC_001728	Olig3	chr10:19356538-19358604	chr10	19356538	19358604	d8 Nkx2-5 EmGFP	CLK	OK	0.104756	0.373442	1.83386	1.03083	0.4654	0.804705	no	0.268686	2066
XLOC_001729	XLOC_001729	Ifngr1	chr10:19591957-19610225	chr10	19591957	19610225	d8 Nkx2-5 EmGFP	CLK	OK	7.50862	2.18115	-1.78346	-1.17113	0.3409	0.727809	no	5.32747	18268
XLOC_001730	XLOC_001730	Il22ra2	chr10:19622027-19634681	chr10	19622027	19634681	d8 Nkx2-5 EmGFP	CLK	NOTEST	0	0	0	0	1	1	no	0	12654
XLOC_001731	XLOC_001731	Il20ra	chr10:19712586-19760053	chr10	19712586	19760053	d8 Nkx2-5 EmGFP	CLK	NOTEST	0.0291535	0.0617033	1.08168	0	1	1	no	0.0325498	47467
XLOC_001732	XLOC_001732	Map3k5	chr10:19934525-20142750	chr10	19934525	20142750	d8 Nkx2-5 EmGFP	CLK	OK	0.492763	2.65488	2.42968	1.41818	0.2184	0.628697	no	2.16212	208225
XLOC_001733	XLOC_001733	Mtap7	chr10:20148919-20281590	chr10	20148919	20281590	d8 Nkx2-5 EmGFP	CLK	OK	1.17436	12.5436	3.41701	0.87535	0.3452	0.731325	no	11.3692	132671
XLOC_001734	XLOC_001734	Gm6251	chr10:20148919-20281590	chr10	20148919	20281590	d8 Nkx2-5 EmGFP	CLK	OK	193.582	0.0276229	-12.7748	-0.234236	0.0064	0.131543	no	193.554	132671
XLOC_001735	XLOC_001735	Bclaf1,Fam54a	chr10:20311829-20361669	chr10	20311829	20361669	d8 Nkx2-5 EmGFP	CLK	OK	25.4848	32.3873	0.345789	0.321375	0.77725	0.945134	no	6.9025	49840
XLOC_001736	XLOC_001736	Ahi1	chr10:20952514-21080429	chr10	20952514	21080429	d8 Nkx2-5 EmGFP	CLK	OK	2.49746	4.20674	0.752245	0.495475	0.6338	0.891277	no	1.70928	127915
XLOC_001737	XLOC_001737	Hbs1l	chr10:21295978-21368889	chr10	21295978	21368889	d8 Nkx2-5 EmGFP	CLK	OK	20.0037	47.148	1.23693	1.02712	0.3408	0.727801	no	27.1443	72911
XLOC_001738	XLOC_001738	Aldh8a1	chr10:21377299-21396578	chr10	21377299	21396578	d8 Nkx2-5 EmGFP	CLK	NOTEST	0.0267366	0.0270383	0.0161893	0	1	1	no	0.0003017	19279
XLOC_001739	XLOC_001739	1700020N01Rik	chr10:21593144-21622375	chr10	21593144	21622375	d8 Nkx2-5 EmGFP	CLK	OK	0	0.530793	inf	#NAME?	0.01	0.163475	no	0.530793	29231
XLOC_001740	XLOC_001740	Gm5420	chr10:21690844-21693978	chr10	21690844	21693978	d8 Nkx2-5 EmGFP	CLK	NOTEST	0	0.00401571	inf	0	1	1	no	0.00401571	3134
XLOC_001741	XLOC_001741	-	chr10:21776728-21785981	chr10	21776728	21785981	d8 Nkx2-5 EmGFP	CLK	NOTEST	0	0.00133541	inf	0	1	1	no	0.00133541	9253
XLOC_001742	XLOC_001742	Sgk1	chr10:21882183-21999902	chr10	21882183	21999902	d8 Nkx2-5 EmGFP	CLK	OK	14.636	71.8349	2.29516	1.78904	0.0921	0.400452	no	57.1989	117719
XLOC_001743	XLOC_001743	-	chr10:22113049-22154310	chr10	22113049	22154310	d8 Nkx2-5 EmGFP	CLK	OK	6.93747	1.57289	-2.14099	-0.285848	0.42685	0.781508	no	5.36458	41261
XLOC_001744	XLOC_001744	Raet1a,Raet1b,Raet1c,Raet1d,Raet1e	chr10:22157773-22374628	chr10	22157773	22374628	d8 Nkx2-5 EmGFP	CLK	OK	5.52929	18.2578	1.72335	1.05926	0.323	0.715179	no	12.7285	216855
XLOC_001745	XLOC_001745	H60b	chr10:22157773-22374628	chr10	22157773	22374628	d8 Nkx2-5 EmGFP	CLK	OK	0.692079	0.715734	0.048488	0.00720166	0.651	0.898469	no	0.023655	216855
XLOC_001746	XLOC_001746	C920009B18Rik	chr10:22157773-22374628	chr10	22157773	22374628	d8 Nkx2-5 EmGFP	CLK	NOTEST	0.0720471	0.00187295	-5.26556	0	1	1	no	0.0701742	216855
XLOC_001747	XLOC_001747	Gm10825	chr10:22402812-22408850	chr10	22402812	22408850	d8 Nkx2-5 EmGFP	CLK	NOTEST	0.00672224	0.0395044	2.555	0	1	1	no	0.0327822	6038
XLOC_001748	XLOC_001748	Slc2a12	chr10:22645001-22732108	chr10	22645001	22732108	d8 Nkx2-5 EmGFP	CLK	OK	1.40139	0.224759	-2.64041	-0.428611	0.5423	0.848643	no	1.17663	87107
XLOC_001749	XLOC_001749	Tcf21	chr10:22814926-22820128	chr10	22814926	22820128	d8 Nkx2-5 EmGFP	CLK	OK	0.123264	0	#NAME?	#NAME?	0.20345	0.610408	no	0.123264	5202
XLOC_001750	XLOC_001750	-	chr10:23780273-23783422	chr10	23780273	23783422	d8 Nkx2-5 EmGFP	CLK	OK	0.278566	0.154543	-0.85001	-0.517525	0.72425	0.927923	no	0.124023	3149
XLOC_001751	XLOC_001751	1110021L09Rik	chr10:23796913-23827968	chr10	23796913	23827968	d8 Nkx2-5 EmGFP	CLK	OK	1.85483	2.41546	0.381011	0.20698	0.8475	0.962293	no	0.56063	31055
XLOC_001752	XLOC_001752	Vnn3	chr10:23851461-23869843	chr10	23851461	23869843	d8 Nkx2-5 EmGFP	CLK	NOTEST	0	0	0	0	1	1	no	0	18382
XLOC_001753	XLOC_001753	Vnn1	chr10:23894687-23905343	chr10	23894687	23905343	d8 Nkx2-5 EmGFP	CLK	OK	0.948153	0.073158	-3.69603	-2.08558	0.174	0.567242	no	0.874995	10656
XLOC_001754	XLOC_001754	Taar1	chr10:23920405-23921404	chr10	23920405	23921404	d8 Nkx2-5 EmGFP	CLK	NOTEST	0	0	0	0	1	1	no	0	999
XLOC_001755	XLOC_001755	Taar2	chr10:23938571-23941583	chr10	23938571	23941583	d8 Nkx2-5 EmGFP	CLK	NOTEST	0	0	0	0	1	1	no	0	3012
XLOC_001756	XLOC_001756	Taar3	chr10:23949557-23950589	chr10	23949557	23950589	d8 Nkx2-5 EmGFP	CLK	NOTEST	0	0	0	0	1	1	no	0	1032
XLOC_001757	XLOC_001757	Taar4	chr10:23960493-23961537	chr10	23960493	23961537	d8 Nkx2-5 EmGFP	CLK	NOTEST	0	0	0	0	1	1	no	0	1044
XLOC_001758	XLOC_001758	Taar5	chr10:23970705-23971719	chr10	23970705	23971719	d8 Nkx2-5 EmGFP	CLK	NOTEST	0	0	0	0	1	1	no	0	1014
XLOC_001759	XLOC_001759	Taar7b	chr10:23999938-24001015	chr10	23999938	24001015	d8 Nkx2-5 EmGFP	CLK	NOTEST	0	0	0	0	1	1	no	0	1077
XLOC_001760	XLOC_001760	Taar7d	chr10:24027221-24028298	chr10	24027221	24028298	d8 Nkx2-5 EmGFP	CLK	NOTEST	0	0	0	0	1	1	no	0	1077
XLOC_001761	XLOC_001761	Taar7e	chr10:24037613-24038690	chr10	24037613	24038690	d8 Nkx2-5 EmGFP	CLK	NOTEST	0	0	0	0	1	1	no	0	1077
XLOC_001762	XLOC_001762	Taar7f	chr10:24049509-24050586	chr10	24049509	24050586	d8 Nkx2-5 EmGFP	CLK	NOTEST	0	0	0	0	1	1	no	0	1077
XLOC_001763	XLOC_001763	Taar8a	chr10:24076499-24077534	chr10	24076499	24077534	d8 Nkx2-5 EmGFP	CLK	NOTEST	0	0	0	0	1	1	no	0	1035
XLOC_001764	XLOC_001764	Stx7	chr10:24149316-24188959	chr10	24149316	24188959	d8 Nkx2-5 EmGFP	CLK	OK	25.1655	9.75479	-1.36727	-0.994002	0.3353	0.724089	no	15.4107	39643
XLOC_001765	XLOC_001765	Moxd1	chr10:24223516-24302783	chr10	24223516	24302783	d8 Nkx2-5 EmGFP	CLK	OK	0.573584	3.75868	2.71215	1.65867	0.19375	0.596327	no	3.1851	79267
XLOC_001766	XLOC_001766	Ctgf	chr10:24595441-24598682	chr10	24595441	24598682	d8 Nkx2-5 EmGFP	CLK	OK	22.278	35.0213	0.652612	0.588677	0.6203	0.885415	no	12.7433	3241
XLOC_001767	XLOC_001767	Med23	chr10:24869985-24913529	chr10	24869985	24913529	d8 Nkx2-5 EmGFP	CLK	OK	10.063	20.2435	1.0084	0.810932	0.43125	0.783413	no	10.1805	43544
XLOC_001768	XLOC_001768	Epb4.1l2	chr10:25359797-25523518	chr10	25359797	25523518	d8 Nkx2-5 EmGFP	CLK	OK	28.2201	40.1634	0.509158	0.433969	0.6747	0.90733	no	11.9433	163721
XLOC_001769	XLOC_001769	Tmem200a	chr10:25991185-26079447	chr10	25991185	26079447	d8 Nkx2-5 EmGFP	CLK	NOTEST	0	0	0	0	1	1	no	0	88262
XLOC_001770	XLOC_001770	Gm9767	chr10:25991185-26079447	chr10	25991185	26079447	d8 Nkx2-5 EmGFP	CLK	OK	0.00186513	0.22476	6.91297	0.24682	0.2733	0.67455	no	0.222895	88262
XLOC_001771	XLOC_001771	Samd3	chr10:26229706-26272172	chr10	26229706	26272172	d8 Nkx2-5 EmGFP	CLK	OK	0.096676	0.01073	-3.17151	-1.31161	0.28575	0.685409	no	0.085946	42466
XLOC_001772	XLOC_001772	Arhgap18	chr10:26772475-26918648	chr10	26772475	26918648	d8 Nkx2-5 EmGFP	CLK	OK	2.58014	0.796637	-1.69545	-0.933057	0.3886	0.757425	no	1.7835	146173
XLOC_001773	XLOC_001773	Ptprk	chr10:28074819-28597397	chr10	28074819	28597397	d8 Nkx2-5 EmGFP	CLK	OK	9.40945	23.7039	1.33294	1.09027	0.30015	0.69736	no	14.2945	522578
XLOC_001774	XLOC_001774	Themis	chr10:28668394-28882749	chr10	28668394	28882749	d8 Nkx2-5 EmGFP	CLK	OK	0	0.11352	inf	#NAME?	0.01095	0.17326	no	0.11352	214355
XLOC_001775	XLOC_001775	6330407J23Rik,9330159F19Rik	chr10:29143681-29230779	chr10	29143681	29230779	d8 Nkx2-5 EmGFP	CLK	OK	0.225203	2.13217	3.24302	1.5848	0.154	0.533692	no	1.90697	87098
XLOC_001776	XLOC_001776	Echdc1	chr10:29312765-29362442	chr10	29312765	29362442	d8 Nkx2-5 EmGFP	CLK	OK	5.26062	0.861809	-2.60979	-0.864548	0.51865	0.835898	no	4.39881	49677
XLOC_001777	XLOC_001777	Hddc2	chr10:31313404-31328086	chr10	31313404	31328086	d8 Nkx2-5 EmGFP	CLK	OK	26.7553	19.6966	-0.441878	-0.351202	0.78425	0.946128	no	7.0587	14682
XLOC_001778	XLOC_001778	Trdn	chr10:33083482-33476709	chr10	33083482	33476709	d8 Nkx2-5 EmGFP	CLK	OK	0.166342	0.0181088	-3.1994	-0.287374	0.3053	0.702008	no	0.148233	393227
XLOC_001779	XLOC_001779	Sult3a1	chr10:33857721-33879475	chr10	33857721	33879475	d8 Nkx2-5 EmGFP	CLK	NOTEST	0	0	0	0	1	1	no	0	21754
XLOC_001780	XLOC_001780	Rsph4a	chr10:33905004-33916930	chr10	33905004	33916930	d8 Nkx2-5 EmGFP	CLK	OK	0.0897304	0.674733	2.91065	1.42785	0.21995	0.630793	no	0.585003	11926
XLOC_001781	XLOC_001781	Bet3l	chr10:34037596-34109815	chr10	34037596	34109815	d8 Nkx2-5 EmGFP	CLK	NOTEST	0	0	0	0	1	1	no	0	72219
XLOC_001782	XLOC_001782	Tspyl1	chr10:34275244-34301320	chr10	34275244	34301320	d8 Nkx2-5 EmGFP	CLK	OK	24.8308	14.4355	-0.782511	-0.630088	0.5924	0.873271	no	10.3953	26076
XLOC_001783	XLOC_001783	Tspyl4	chr10:34275244-34301320	chr10	34275244	34301320	d8 Nkx2-5 EmGFP	CLK	OK	5.19288	1.25672	-2.04687	-0.617171	0.61205	0.882049	no	3.93616	26076
XLOC_001784	XLOC_001784	Col10a1	chr10:34303611-34418560	chr10	34303611	34418560	d8 Nkx2-5 EmGFP	CLK	NOTEST	0.00522981	0.0165204	1.65942	0	1	1	no	0.0112906	114949
XLOC_001785	XLOC_001785	Frk	chr10:34483398-34611471	chr10	34483398	34611471	d8 Nkx2-5 EmGFP	CLK	OK	0.663928	0.0532823	-3.6393	-1.7674	0.15135	0.528206	no	0.610646	128073
XLOC_001786	XLOC_001786	Hs3st5	chr10:36506806-36834394	chr10	36506806	36834394	d8 Nkx2-5 EmGFP	CLK	NOTEST	0.0443912	0.0638525	0.524472	0	1	1	no	0.0194613	327588
XLOC_001787	XLOC_001787	Hdac2	chr10:36974543-37001889	chr10	36974543	37001889	d8 Nkx2-5 EmGFP	CLK	OK	55.2596	48.2211	-0.19656	-0.162494	0.8695	0.968466	no	7.0385	27346
XLOC_001788	XLOC_001788	-	chr10:37141019-37150972	chr10	37141019	37150972	d8 Nkx2-5 EmGFP	CLK	OK	0.383345	0.405437	0.0808369	0.045779	0.96995	0.990684	no	0.022092	9953
XLOC_001789	XLOC_001789	Lama4	chr10:38965514-39110188	chr10	38965514	39110188	d8 Nkx2-5 EmGFP	CLK	OK	21.1037	1.82713	-3.52985	-2.42561	0.0273	0.245204	no	19.2766	144674
XLOC_001790	XLOC_001790	Tube1	chr10:39133980-39163794	chr10	39133980	39163794	d8 Nkx2-5 EmGFP	CLK	OK	8.83107	5.24493	-0.751665	-0.594288	0.63055	0.889761	no	3.58614	29814
XLOC_001791	XLOC_001791	Fyn	chr10:39369798-39565374	chr10	39369798	39565374	d8 Nkx2-5 EmGFP	CLK	OK	14.6155	11.5816	-0.335665	-0.257306	0.7993	0.949957	no	3.0339	195576
XLOC_001792	XLOC_001792	Traf3ip2	chr10:39612933-39732007	chr10	39612933	39732007	d8 Nkx2-5 EmGFP	CLK	OK	6.46404	2.28978	-1.49723	-0.847285	0.436	0.786013	no	4.17426	119074
XLOC_001793	XLOC_001793	Rev3l	chr10:39732159-39875300	chr10	39732159	39875300	d8 Nkx2-5 EmGFP	CLK	OK	2.73292	2.3532	-0.215818	-0.15746	0.87425	0.969707	no	0.37972	143141
XLOC_001794	XLOC_001794	Cdk19	chr10:40349307-40483818	chr10	40349307	40483818	d8 Nkx2-5 EmGFP	CLK	OK	3.65457	1.06959	-1.77264	-1.07179	0.3077	0.704082	no	2.58498	134511
XLOC_001795	XLOC_001795	Slc22a16	chr10:40570361-40604132	chr10	40570361	40604132	d8 Nkx2-5 EmGFP	CLK	NOTEST	0	0	0	0	1	1	no	0	33771
XLOC_001796	XLOC_001796	Ddo	chr10:40630010-40649931	chr10	40630010	40649931	d8 Nkx2-5 EmGFP	CLK	NOTEST	0	0	0	0	1	1	no	0	19921
XLOC_001797	XLOC_001797	9030224M15Rik	chr10:40683216-40813030	chr10	40683216	40813030	d8 Nkx2-5 EmGFP	CLK	OK	1.31037	0.244243	-2.42359	-1.13757	0.3112	0.706518	no	1.06613	129814
XLOC_001798	XLOC_001798	Wasf1	chr10:40883533-40938570	chr10	40883533	40938570	d8 Nkx2-5 EmGFP	CLK	OK	21.1028	23.6457	0.164142	0.128238	0.8995	0.974964	no	2.5429	55037
XLOC_001799	XLOC_001799	Zbtb24	chr10:41450385-41465574	chr10	41450385	41465574	d8 Nkx2-5 EmGFP	CLK	OK	2.89819	4.47521	0.626805	0.396225	0.70625	0.921004	no	1.57702	15189
XLOC_001800	XLOC_001800	Mical1,Ppil6	chr10:41475259-41514288	chr10	41475259	41514288	d8 Nkx2-5 EmGFP	CLK	OK	32.129	12.7973	-1.32803	-0.83489	0.36315	0.742687	no	19.3317	39029
XLOC_001801	XLOC_001801	Cd164	chr10:41519499-41532370	chr10	41519499	41532370	d8 Nkx2-5 EmGFP	CLK	OK	83.2437	72.0372	-0.208598	-0.179058	0.8621	0.965777	no	11.2065	12871
XLOC_001802	XLOC_001802	5730435O14Rik	chr10:41538848-41587753	chr10	41538848	41587753	d8 Nkx2-5 EmGFP	CLK	NOTEST	0.0168481	0	#NAME?	0	1	1	no	0.0168481	48905
XLOC_001803	XLOC_001803	Sesn1	chr10:41718839-41908436	chr10	41718839	41908436	d8 Nkx2-5 EmGFP	CLK	OK	6.94041	3.54565	-0.96897	-0.484079	0.64975	0.898064	no	3.39476	189597
XLOC_001804	XLOC_001804	Snx3	chr10:42502053-42535369	chr10	42502053	42535369	d8 Nkx2-5 EmGFP	CLK	OK	86.1934	126.673	0.55546	0.573333	0.6424	0.894952	no	40.4796	33316
XLOC_001805	XLOC_001805	Ostm1	chr10:42678915-42702462	chr10	42678915	42702462	d8 Nkx2-5 EmGFP	CLK	OK	3.38455	3.05819	-0.146289	-0.106123	0.93655	0.983767	no	0.32636	23547
XLOC_001806	XLOC_001806	Sec63	chr10:42761495-42832514	chr10	42761495	42832514	d8 Nkx2-5 EmGFP	CLK	OK	14.8632	7.51583	-0.983744	-0.77317	0.4545	0.797673	no	7.34737	71019
XLOC_001807	XLOC_001807	Scml4	chr10:42860511-42960782	chr10	42860511	42960782	d8 Nkx2-5 EmGFP	CLK	OK	0.0192792	0.0793972	2.04204	0.916817	0.4212	0.778071	no	0.060118	100271
XLOC_001808	XLOC_001808	9030612E09Rik	chr10:43174703-43176562	chr10	43174703	43176562	d8 Nkx2-5 EmGFP	CLK	NOTEST	0.058886	0.01695	-1.79664	0	1	1	no	0.041936	1859
XLOC_001809	XLOC_001809	Pdss2	chr10:43221485-43464882	chr10	43221485	43464882	d8 Nkx2-5 EmGFP	CLK	OK	3.14994	9.10704	1.53166	0.917967	0.3902	0.758374	no	5.9571	243397
XLOC_001810	XLOC_001810	Bend3	chr10:43479139-43515467	chr10	43479139	43515467	d8 Nkx2-5 EmGFP	CLK	OK	5.30093	29.1769	2.46051	1.94447	0.0737	0.347999	no	23.876	36328
XLOC_001811	XLOC_001811	Cd24a	chr10:43579168-43584265	chr10	43579168	43584265	d8 Nkx2-5 EmGFP	CLK	OK	141.769	34.5477	-2.03688	-2.1486	0.12115	0.469793	no	107.221	5097
XLOC_001812	XLOC_001812	F830002L21Rik	chr10:43593426-43630913	chr10	43593426	43630913	d8 Nkx2-5 EmGFP	CLK	NOTEST	0	0	0	0	1	1	no	0	37487
XLOC_001813	XLOC_001813	1700027J07Rik	chr10:43746157-43765836	chr10	43746157	43765836	d8 Nkx2-5 EmGFP	CLK	NOTEST	0	0.00687248	inf	0	1	1	no	0.00687248	19679
XLOC_001814	XLOC_001814	Rtn4ip1	chr10:43901806-43947862	chr10	43901806	43947862	d8 Nkx2-5 EmGFP	CLK	OK	2.38243	6.90171	1.53452	1.13418	0.38	0.752493	no	4.51928	46056
XLOC_001815	XLOC_001815	Speer5-ps1	chr10:44170446-44219585	chr10	44170446	44219585	d8 Nkx2-5 EmGFP	CLK	NOTEST	0	0	0	0	1	1	no	0	49139
XLOC_001816	XLOC_001816	Atg5	chr10:44268357-44364291	chr10	44268357	44364291	d8 Nkx2-5 EmGFP	CLK	OK	7.02374	10.3365	0.557441	0.381931	0.713	0.92389	no	3.31276	95934
XLOC_001817	XLOC_001817	Mir1929	chr10:44268357-44364291	chr10	44268357	44364291	d8 Nkx2-5 EmGFP	CLK	NOTEST	0	0	0	0	1	1	no	0	95934
XLOC_001818	XLOC_001818	Prep	chr10:45064951-45166764	chr10	45064951	45166764	d8 Nkx2-5 EmGFP	CLK	OK	39.7951	66.953	0.750559	0.63107	0.5349	0.844492	no	27.1579	101813
XLOC_001819	XLOC_001819	-	chr10:45180424-45181020	chr10	45180424	45181020	d8 Nkx2-5 EmGFP	CLK	OK	0	0.233803	inf	#NAME?	0.04105	0.255134	no	0.233803	596
XLOC_001820	XLOC_001820	Popdc3	chr10:45289304-45318450	chr10	45289304	45318450	d8 Nkx2-5 EmGFP	CLK	OK	4.23526	0.160608	-4.72083	-2.42836	0.06245	0.310244	no	4.07465	29146
XLOC_001821	XLOC_001821	Bves	chr10:45335761-45372545	chr10	45335761	45372545	d8 Nkx2-5 EmGFP	CLK	OK	21.1147	1.02059	-4.37078	-2.36444	0.0485	0.270019	no	20.0941	36784
XLOC_001822	XLOC_001822	Hace1	chr10:45577828-45712345	chr10	45577828	45712345	d8 Nkx2-5 EmGFP	CLK	OK	4.59987	2.95297	-0.639427	-0.410763	0.69415	0.915469	no	1.6469	134517
XLOC_001823	XLOC_001823	D030045P18Rik	chr10:45807703-45852188	chr10	45807703	45852188	d8 Nkx2-5 EmGFP	CLK	NOTEST	0.0308218	0	#NAME?	0	1	1	no	0.0308218	44485
XLOC_001824	XLOC_001824	Snord14d	chr10:46244747-46244770	chr10	46244747	46244770	d8 Nkx2-5 EmGFP	CLK	NOTEST	0	0	0	0	1	1	no	0	23
XLOC_001825	XLOC_001825	Ascc3	chr10:50592668-50853136	chr10	50592668	50853136	d8 Nkx2-5 EmGFP	CLK	OK	6.02737	8.16322	0.437611	0.34355	0.73545	0.931831	no	2.13585	260468
XLOC_001826	XLOC_001826	Sim1	chr10:50895650-50989152	chr10	50895650	50989152	d8 Nkx2-5 EmGFP	CLK	NOTEST	0.00266754	0.0232035	3.12076	0	1	1	no	0.020536	93502
XLOC_001827	XLOC_001827	Gp49a,Lilrb4	chr10:51480635-51496611	chr10	51480635	51496611	d8 Nkx2-5 EmGFP	CLK	OK	0.626908	0	#NAME?	#NAME?	0.00315	0.0875717	no	0.626908	15976
XLOC_001828	XLOC_001828	Rfx6	chr10:51677737-51730429	chr10	51677737	51730429	d8 Nkx2-5 EmGFP	CLK	OK	0.986554	0.405585	-1.28239	-0.603881	0.56365	0.859444	no	0.580969	52692
XLOC_001829	XLOC_001829	Vgll2	chr10:52022536-52028580	chr10	52022536	52028580	d8 Nkx2-5 EmGFP	CLK	OK	0.533243	0.0507071	-3.39453	-1.58071	0.19335	0.596327	no	0.482536	6044
XLOC_001830	XLOC_001830	Dcbld1	chr10:52233618-52321377	chr10	52233618	52321377	d8 Nkx2-5 EmGFP	CLK	OK	4.15902	5.83142	0.487603	0.365751	0.7605	0.940051	no	1.6724	87759
XLOC_001831	XLOC_001831	Nepn	chr10:52391607-52404604	chr10	52391607	52404604	d8 Nkx2-5 EmGFP	CLK	OK	3.26772	0	#NAME?	#NAME?	0.00015	0.010466	yes	3.26772	12997
XLOC_001832	XLOC_001832	Nus1	chr10:52417546-52440192	chr10	52417546	52440192	d8 Nkx2-5 EmGFP	CLK	OK	13.531	12.4818	-0.116438	-0.117703	0.93155	0.983077	no	1.0492	22646
XLOC_001833	XLOC_001833	Slc35f1	chr10:52690500-53111622	chr10	52690500	53111622	d8 Nkx2-5 EmGFP	CLK	OK	0.62094	1.1051	0.831657	0.554929	0.6977	0.91759	no	0.48416	421122
XLOC_001834	XLOC_001834	Gm19395	chr10:53273466-53379851	chr10	53273466	53379851	d8 Nkx2-5 EmGFP	CLK	NOTEST	0.0182974	0	#NAME?	0	1	1	no	0.0182974	106385
XLOC_001835	XLOC_001835	Pln	chr10:53273466-53379851	chr10	53273466	53379851	d8 Nkx2-5 EmGFP	CLK	OK	0.140875	0.0117215	-3.58719	-0.185485	0.22105	0.631499	no	0.129154	106385
XLOC_001836	XLOC_001836	Asf1a	chr10:53536257-53630439	chr10	53536257	53630439	d8 Nkx2-5 EmGFP	CLK	OK	9.65957	23.3182	1.27143	0.981142	0.4728	0.809776	no	13.6586	94182
XLOC_001837	XLOC_001837	Gm16998	chr10:54075921-54081081	chr10	54075921	54081081	d8 Nkx2-5 EmGFP	CLK	OK	0.176874	0.0127127	-3.79839	-1.86518	0.3317	0.72177	no	0.164161	5160
XLOC_001838	XLOC_001838	Msl3l2	chr10:56014293-56228689	chr10	56014293	56228689	d8 Nkx2-5 EmGFP	CLK	OK	2.51097	1.12374	-1.15994	-0.381288	0.74335	0.934188	no	1.38723	214396
XLOC_001839	XLOC_001839	Gja1	chr10:56377299-56390419	chr10	56377299	56390419	d8 Nkx2-5 EmGFP	CLK	OK	54.8555	66.4905	0.27751	0.285314	0.8161	0.954473	no	11.635	13120
XLOC_001840	XLOC_001840	-	chr10:56432002-56438653	chr10	56432002	56438653	d8 Nkx2-5 EmGFP	CLK	OK	0.636054	0.207022	-1.61937	-1.63105	0.5565	0.856262	no	0.429032	6651
XLOC_001841	XLOC_001841	Hsf2	chr10:57486384-57513143	chr10	57486384	57513143	d8 Nkx2-5 EmGFP	CLK	OK	11.8052	14.2425	0.270779	0.201199	0.8474	0.96227	no	2.4373	26759
XLOC_001842	XLOC_001842	Pkib	chr10:57631980-57741112	chr10	57631980	57741112	d8 Nkx2-5 EmGFP	CLK	NOTEST	0.0382729	0.0513644	0.424447	0	1	1	no	0.0130915	109132
XLOC_001843	XLOC_001843	Fabp7	chr10:57784922-57788450	chr10	57784922	57788450	d8 Nkx2-5 EmGFP	CLK	OK	2.18309	0.377958	-2.53008	-1.52439	0.3178	0.711992	no	1.80513	3528
XLOC_001844	XLOC_001844	Smpdl3a	chr10:57794543-57811830	chr10	57794543	57811830	d8 Nkx2-5 EmGFP	CLK	OK	2.98572	0.394785	-2.91894	-1.47419	0.1916	0.5939	no	2.59093	17287
XLOC_001845	XLOC_001845	Gcc2	chr10:58255525-58305592	chr10	58255525	58305592	d8 Nkx2-5 EmGFP	CLK	OK	4.81899	2.61069	-0.884298	-0.631216	0.55205	0.853933	no	2.2083	50067
XLOC_001846	XLOC_001846	-	chr10:58311914-58313056	chr10	58311914	58313056	d8 Nkx2-5 EmGFP	CLK	OK	0.320313	0	#NAME?	#NAME?	0.01965	0.224376	no	0.320313	1142
XLOC_001847	XLOC_001847	Lims1	chr10:58323465-58424691	chr10	58323465	58424691	d8 Nkx2-5 EmGFP	CLK	OK	18.7446	12.7448	-0.556562	-0.438726	0.67205	0.906333	no	5.9998	101226
XLOC_001848	XLOC_001848	Ranbp2	chr10:58446574-58494849	chr10	58446574	58494849	d8 Nkx2-5 EmGFP	CLK	OK	15.6743	23.308	0.572423	0.491411	0.62495	0.887752	no	7.6337	48275
XLOC_001849	XLOC_001849	Ccdc138	chr10:58497909-58576610	chr10	58497909	58576610	d8 Nkx2-5 EmGFP	CLK	OK	4.49801	3.88105	-0.212839	-0.121075	0.904	0.97614	no	0.61696	78701
XLOC_001850	XLOC_001850	BB019430	chr10:58696744-58704277	chr10	58696744	58704277	d8 Nkx2-5 EmGFP	CLK	NOTEST	0	0	0	0	1	1	no	0	7533
XLOC_001851	XLOC_001851	Sh3rf3	chr10:58813358-59138916	chr10	58813358	59138916	d8 Nkx2-5 EmGFP	CLK	OK	0.120291	0.364502	1.5994	0.760776	0.48065	0.814057	no	0.244211	325558
XLOC_001852	XLOC_001852	Sowahc	chr10:59141626-59226433	chr10	59141626	59226433	d8 Nkx2-5 EmGFP	CLK	OK	0.343192	0.944664	1.46079	0.232574	0.6498	0.898072	no	0.601472	84807
XLOC_001853	XLOC_001853	P4ha1	chr10:59323256-59373304	chr10	59323256	59373304	d8 Nkx2-5 EmGFP	CLK	OK	79.4954	12.123	-2.71313	-2.21833	0.04305	0.261391	no	67.3724	50048
XLOC_001854	XLOC_001854	Pla2g12b	chr10:59403097-59421976	chr10	59403097	59421976	d8 Nkx2-5 EmGFP	CLK	OK	3.42169	0.0339066	-6.657	-3.04822	0.14675	0.519403	no	3.38778	18879
XLOC_001855	XLOC_001855	Micu1	chr10:59702634-59864122	chr10	59702634	59864122	d8 Nkx2-5 EmGFP	CLK	OK	15.1513	5.6319	-1.42775	-0.980051	0.35085	0.734669	no	9.5194	161488
XLOC_001856	XLOC_001856	Dnajb12	chr10:59879590-59899230	chr10	59879590	59899230	d8 Nkx2-5 EmGFP	CLK	OK	16.3743	19.6872	0.265819	0.201917	0.84535	0.961511	no	3.3129	19640
XLOC_001857	XLOC_001857	Ascc1	chr10:59987908-60099990	chr10	59987908	60099990	d8 Nkx2-5 EmGFP	CLK	OK	30.8819	34.7204	0.169022	0.110864	0.9151	0.978783	no	3.8385	112082
XLOC_001858	XLOC_001858	Spock2	chr10:60106216-60135146	chr10	60106216	60135146	d8 Nkx2-5 EmGFP	CLK	OK	0.678972	5.81364	3.09802	1.89152	0.0982	0.415793	no	5.13467	28930
XLOC_001859	XLOC_001859	Psap	chr10:60277627-60302600	chr10	60277627	60302600	d8 Nkx2-5 EmGFP	CLK	OK	238.244	100.673	-1.24276	-1.08306	0.2852	0.684798	no	137.571	24973
XLOC_001860	XLOC_001860	4632428N05Rik	chr10:60302749-60696490	chr10	60302749	60696490	d8 Nkx2-5 EmGFP	CLK	OK	2.7309	0.420364	-2.69966	-1.39692	0.2161	0.625551	no	2.31054	393741
XLOC_001861	XLOC_001861	Gm17455	chr10:60302749-60696490	chr10	60302749	60696490	d8 Nkx2-5 EmGFP	CLK	OK	0.331092	0.0957398	-1.79004	-0.168724	0.39495	0.76102	no	0.235352	393741
XLOC_001862	XLOC_001862	4930565A17	chr10:61031302-61038080	chr10	61031302	61038080	d8 Nkx2-5 EmGFP	CLK	NOTEST	0	0	0	0	1	1	no	0	6778
XLOC_001863	XLOC_001863	-	chr10:61042420-61051898	chr10	61042420	61051898	d8 Nkx2-5 EmGFP	CLK	OK	0	0.133785	inf	#NAME?	0.10035	0.420841	no	0.133785	9478
XLOC_001864	XLOC_001864	Pcbd1	chr10:61089342-61094329	chr10	61089342	61094329	d8 Nkx2-5 EmGFP	CLK	OK	18.9633	3.32722	-2.51082	-1.89672	0.21575	0.625045	no	15.6361	4987
XLOC_001865	XLOC_001865	Tbata	chr10:61171963-61188841	chr10	61171963	61188841	d8 Nkx2-5 EmGFP	CLK	NOTEST	0.0119098	0.00341867	-1.80064	0	1	1	no	0.00849113	16878
XLOC_001866	XLOC_001866	Prf1	chr10:61297835-61304263	chr10	61297835	61304263	d8 Nkx2-5 EmGFP	CLK	NOTEST	0	0.01625	inf	0	1	1	no	0.01625	6428
XLOC_001867	XLOC_001867	Nodal	chr10:61417971-61425337	chr10	61417971	61425337	d8 Nkx2-5 EmGFP	CLK	OK	2.83996	66.1504	4.54181	3.3111	0.0213	0.231543	no	63.3104	7366
XLOC_001868	XLOC_001868	Lrrc20	chr10:61475288-61582788	chr10	61475288	61582788	d8 Nkx2-5 EmGFP	CLK	OK	3.49028	2.2758	-0.616969	-0.367003	0.7234	0.927716	no	1.21448	107500
XLOC_001869	XLOC_001869	Npffr1	chr10:61595483-61626385	chr10	61595483	61626385	d8 Nkx2-5 EmGFP	CLK	OK	0.158059	0.0490305	-1.68872	-1.05024	0.5353	0.844527	no	0.109029	30902
XLOC_001870	XLOC_001870	Ppa1	chr10:61648620-61674165	chr10	61648620	61674165	d8 Nkx2-5 EmGFP	CLK	OK	30.9558	270.303	3.1263	3.05922	0.02695	0.244803	no	239.347	25545
XLOC_001871	XLOC_001871	Sar1a	chr10:61680320-61693297	chr10	61680320	61693297	d8 Nkx2-5 EmGFP	CLK	OK	56.9421	37.8892	-0.587708	-0.610688	0.6286	0.889181	no	19.0529	12977
XLOC_001872	XLOC_001872	Tysnd1	chr10:61695513-61702773	chr10	61695513	61702773	d8 Nkx2-5 EmGFP	CLK	OK	15.6148	17.5741	0.170542	0.152554	0.9042	0.976172	no	1.9593	7260
XLOC_001873	XLOC_001873	Aifm2	chr10:61715262-61783864	chr10	61715262	61783864	d8 Nkx2-5 EmGFP	CLK	OK	2.65588	3.85827	0.538765	0.168987	0.88395	0.971656	no	1.20239	68602
XLOC_001874	XLOC_001874	Mir5108	chr10:61715262-61783864	chr10	61715262	61783864	d8 Nkx2-5 EmGFP	CLK	NOTEST	0	0	0	0	1	1	no	0	68602
XLOC_001875	XLOC_001875	Neurog3	chr10:62107655-62134763	chr10	62107655	62134763	d8 Nkx2-5 EmGFP	CLK	OK	0.0424906	0.425853	3.32514	0.312923	0.4432	0.789928	no	0.383362	27108
XLOC_001876	XLOC_001876	Tacr2	chr10:62252437-62265990	chr10	62252437	62265990	d8 Nkx2-5 EmGFP	CLK	NOTEST	0	0.021542	inf	0	1	1	no	0.021542	13553
XLOC_001877	XLOC_001877	2210417K05Rik	chr10:62268854-62379908	chr10	62268854	62379908	d8 Nkx2-5 EmGFP	CLK	OK	1.4366	0.109316	-3.71608	-0.0980994	0.1088	0.442001	no	1.32728	111054
XLOC_001878	XLOC_001878	4930507D05Rik	chr10:62429377-62451353	chr10	62429377	62451353	d8 Nkx2-5 EmGFP	CLK	OK	0.135658	1.29645	3.25652	0.287304	0.4513	0.795271	no	1.16079	21976
XLOC_001879	XLOC_001879	Slc25a16	chr10:62920632-62946494	chr10	62920632	62946494	d8 Nkx2-5 EmGFP	CLK	OK	3.29984	3.58441	0.119342	0.0707451	0.94355	0.985076	no	0.28457	25862
XLOC_001880	XLOC_001880	Dna2	chr10:62947028-62974188	chr10	62947028	62974188	d8 Nkx2-5 EmGFP	CLK	OK	3.36248	10.618	1.65892	1.21079	0.2747	0.675476	no	7.25552	27160
XLOC_001881	XLOC_001881	Rufy2	chr10:62980222-63024005	chr10	62980222	63024005	d8 Nkx2-5 EmGFP	CLK	OK	2.47886	1.50984	-0.715285	-0.308668	0.79605	0.949015	no	0.96902	43783
XLOC_001882	XLOC_001882	Pbld2	chr10:63024313-63058812	chr10	63024313	63058812	d8 Nkx2-5 EmGFP	CLK	OK	0.0804243	0.0758428	-0.084618	-0.039	0.96375	0.989256	no	0.0045815	34499
XLOC_001883	XLOC_001883	Pbld1	chr10:63061616-63100774	chr10	63061616	63100774	d8 Nkx2-5 EmGFP	CLK	OK	0.153428	2.68707	4.1304	1.89988	0.1155	0.457869	no	2.53364	39158
XLOC_001884	XLOC_001884	Atoh7	chr10:63061616-63100774	chr10	63061616	63100774	d8 Nkx2-5 EmGFP	CLK	NOTEST	0	0.0230027	inf	0	1	1	no	0.0230027	39158
XLOC_001885	XLOC_001885	Herc4	chr10:63243796-63317881	chr10	63243796	63317881	d8 Nkx2-5 EmGFP	CLK	OK	8.2819	23.8821	1.5279	1.18854	0.25625	0.660371	no	15.6002	74085
XLOC_001886	XLOC_001886	-	chr10:63339334-63344550	chr10	63339334	63344550	d8 Nkx2-5 EmGFP	CLK	OK	0.272563	0	#NAME?	#NAME?	0.0361	0.255134	no	0.272563	5216
XLOC_001887	XLOC_001887	Dnajc12	chr10:63382442-63408840	chr10	63382442	63408840	d8 Nkx2-5 EmGFP	CLK	OK	3.52427	2.50474	-0.492664	-0.258875	0.80815	0.952318	no	1.01953	26398
XLOC_001888	XLOC_001888	Ctnna3	chr10:63430097-65004644	chr10	63430097	65004644	d8 Nkx2-5 EmGFP	CLK	OK	1.20061	0	#NAME?	#NAME?	0.06275	0.311377	no	1.20061	1574547
XLOC_001889	XLOC_001889	Jmjd1c	chr10:67009188-67256326	chr10	67009188	67256326	d8 Nkx2-5 EmGFP	CLK	OK	6.81436	18.3356	1.428	1.00628	0.33865	0.726099	no	11.5212	247138
XLOC_001890	XLOC_001890	Egr2	chr10:67537260-67542188	chr10	67537260	67542188	d8 Nkx2-5 EmGFP	CLK	OK	4.12889	0.285422	-3.85458	-2.13502	0.0785	0.361899	no	3.84347	4928
XLOC_001891	XLOC_001891	Rtkn2	chr10:67979551-68045441	chr10	67979551	68045441	d8 Nkx2-5 EmGFP	CLK	OK	1.47998	4.00367	1.43574	0.877248	0.40395	0.767748	no	2.52369	65890
XLOC_001892	XLOC_001892	Tmem26	chr10:68723745-68782654	chr10	68723745	68782654	d8 Nkx2-5 EmGFP	CLK	OK	1.10725	0.0297299	-5.21892	-3.10412	0.0856	0.382278	no	1.07752	58909
XLOC_001893	XLOC_001893	-	chr10:69136364-69182800	chr10	69136364	69182800	d8 Nkx2-5 EmGFP	CLK	OK	0.560091	0	#NAME?	#NAME?	0.0114	0.176331	no	0.560091	46436
XLOC_001894	XLOC_001894	Rhobtb1	chr10:69208551-69291784	chr10	69208551	69291784	d8 Nkx2-5 EmGFP	CLK	OK	11.8297	0.290574	-5.34736	-3.12918	0.02085	0.229104	no	11.5391	83233
XLOC_001895	XLOC_001895	Ank3	chr10:69533614-70027436	chr10	69533614	70027436	d8 Nkx2-5 EmGFP	CLK	OK	7.91532	3.83334	-1.04605	-0.802242	0.43115	0.783325	no	4.08198	493822
XLOC_001896	XLOC_001896	Ccdc6	chr10:70097120-70193200	chr10	70097120	70193200	d8 Nkx2-5 EmGFP	CLK	OK	21.6271	10.7543	-1.00792	-0.94093	0.43325	0.784227	no	10.8728	96080
XLOC_001897	XLOC_001897	2310015B20Rik	chr10:70204666-70219711	chr10	70204666	70219711	d8 Nkx2-5 EmGFP	CLK	NOTEST	0.0567935	0	#NAME?	0	1	1	no	0.0567935	15045
XLOC_001898	XLOC_001898	Slc16a9	chr10:70245275-70285951	chr10	70245275	70285951	d8 Nkx2-5 EmGFP	CLK	OK	2.25844	0.573392	-1.97773	-1.05025	0.34145	0.72824	no	1.68505	40676
XLOC_001899	XLOC_001899	-	chr10:70365064-70368483	chr10	70365064	70368483	d8 Nkx2-5 EmGFP	CLK	OK	0	0.277235	inf	#NAME?	0.0146	0.199514	no	0.277235	3419
XLOC_001900	XLOC_001900	-	chr10:70379429-70404633	chr10	70379429	70404633	d8 Nkx2-5 EmGFP	CLK	OK	0	0.121935	inf	#NAME?	0.05805	0.296051	no	0.121935	25204
XLOC_001901	XLOC_001901	Fam13c	chr10:70440667-70599291	chr10	70440667	70599291	d8 Nkx2-5 EmGFP	CLK	OK	0.418195	1.8423	2.13926	0.775945	0.48055	0.814024	no	1.4241	158624
XLOC_001902	XLOC_001902	Ipmk	chr10:71347792-71385885	chr10	71347792	71385885	d8 Nkx2-5 EmGFP	CLK	OK	4.83868	19.0832	1.97962	1.51932	0.1497	0.525275	no	14.2445	38093
XLOC_001903	XLOC_001903	Zwint	chr10:72654723-72674965	chr10	72654723	72674965	d8 Nkx2-5 EmGFP	CLK	OK	107.141	54.3153	-0.980085	-0.802554	0.43235	0.784143	no	52.8257	20242
XLOC_001904	XLOC_001904	Pcdh15	chr10:73821866-74649732	chr10	73821866	74649732	d8 Nkx2-5 EmGFP	CLK	NOTEST	0.00683527	0.00463464	-0.560541	0	1	1	no	0.00220063	827866
XLOC_001905	XLOC_001905	Gnaz	chr10:74957476-75032586	chr10	74957476	75032586	d8 Nkx2-5 EmGFP	CLK	OK	0.579119	2.21877	1.93783	1.0451	0.3389	0.726225	no	1.63965	75110
XLOC_001906	XLOC_001906	Rab36	chr10:75037088-75054773	chr10	75037088	75054773	d8 Nkx2-5 EmGFP	CLK	OK	2.51435	0.290271	-3.11471	-1.6401	0.15775	0.540999	no	2.22408	17685
XLOC_001907	XLOC_001907	Bcr	chr10:75060895-75184923	chr10	75060895	75184923	d8 Nkx2-5 EmGFP	CLK	OK	11.6722	14.1474	0.277456	0.222847	0.8309	0.958158	no	2.4752	124028
XLOC_001908	XLOC_001908	Specc1l	chr10:75212072-75312400	chr10	75212072	75312400	d8 Nkx2-5 EmGFP	CLK	OK	14.1737	11.1376	-0.347778	-0.283986	0.7805	0.945595	no	3.0361	100328
XLOC_001909	XLOC_001909	Adora2a	chr10:75316942-75334788	chr10	75316942	75334788	d8 Nkx2-5 EmGFP	CLK	OK	4.30793	0.362192	-3.57217	-1.96142	0.09815	0.415698	no	3.94574	17846
XLOC_001910	XLOC_001910	Gm5779	chr10:75352054-75352961	chr10	75352054	75352961	d8 Nkx2-5 EmGFP	CLK	NOTEST	0.0104634	0.075194	2.84526	0	1	1	no	0.0647306	907
XLOC_001911	XLOC_001911	Upb1	chr10:75405841-75440195	chr10	75405841	75440195	d8 Nkx2-5 EmGFP	CLK	OK	0.0959149	0.261302	1.44589	0.671497	0.5579	0.856644	no	0.165387	34354
XLOC_001912	XLOC_001912	4933407G14Rik	chr10:75449509-75463104	chr10	75449509	75463104	d8 Nkx2-5 EmGFP	CLK	NOTEST	0	0	0	0	1	1	no	0	13595
XLOC_001913	XLOC_001913	Snrpd3	chr10:75506813-75537492	chr10	75506813	75537492	d8 Nkx2-5 EmGFP	CLK	OK	162.727	220.043	0.435326	0.312474	0.7585	0.93961	no	57.316	30679
XLOC_001914	XLOC_001914	Ggt1	chr10:75564181-75586190	chr10	75564181	75586190	d8 Nkx2-5 EmGFP	CLK	OK	0.52415	3.18707	2.60418	1.34168	0.22685	0.636463	no	2.66292	22009
XLOC_001915	XLOC_001915	Ggt5	chr10:75589380-75616968	chr10	75589380	75616968	d8 Nkx2-5 EmGFP	CLK	NOTEST	0.0698833	0.0687667	-0.0232382	0	1	1	no	0.0011166	27588
XLOC_001916	XLOC_001916	Derl3	chr10:75893397-75895941	chr10	75893397	75895941	d8 Nkx2-5 EmGFP	CLK	OK	1.54031	4.66106	1.59744	0.987877	0.45175	0.795647	no	3.12075	2544
XLOC_001917	XLOC_001917	Chchd10	chr10:75935572-75937734	chr10	75935572	75937734	d8 Nkx2-5 EmGFP	CLK	OK	17.9384	331.806	4.20921	4.15536	0.01325	0.189344	no	313.868	2162
XLOC_001918	XLOC_001918	Vpreb3	chr10:75947587-75951339	chr10	75947587	75951339	d8 Nkx2-5 EmGFP	CLK	OK	0	1.89927	inf	#NAME?	0.14275	0.511304	no	1.89927	3752
XLOC_001919	XLOC_001919	Gm5134	chr10:75954513-76009589	chr10	75954513	76009589	d8 Nkx2-5 EmGFP	CLK	OK	0.0183456	0.33127	4.1745	1.87992	0.1859	0.585694	no	0.312924	55076
XLOC_001920	XLOC_001920	Zfp280b	chr10:76032354-76046289	chr10	76032354	76046289	d8 Nkx2-5 EmGFP	CLK	OK	9.83579	9.36732	-0.0704047	-0.0535319	0.9582	0.988043	no	0.46847	13935
XLOC_001921	XLOC_001921	Slc5a4a	chr10:76147450-76189265	chr10	76147450	76189265	d8 Nkx2-5 EmGFP	CLK	NOTEST	0.0341997	0.00390609	-3.13019	0	1	1	no	0.0302936	41815
XLOC_001922	XLOC_001922	S100b	chr10:76253835-76261319	chr10	76253835	76261319	d8 Nkx2-5 EmGFP	CLK	NOTEST	0.0595413	0.0214724	-1.47141	0	1	1	no	0.0380689	7484
XLOC_001923	XLOC_001923	1700094J05Rik	chr10:76351212-76443933	chr10	76351212	76443933	d8 Nkx2-5 EmGFP	CLK	OK	0	0.307683	inf	#NAME?	0.0192	0.221997	no	0.307683	92721
XLOC_001924	XLOC_001924	2610028H24Rik	chr10:76449080-76515857	chr10	76449080	76515857	d8 Nkx2-5 EmGFP	CLK	OK	0.108601	0.0143215	-2.92278	-0.0256031	0.05465	0.28546	no	0.0942795	66777
XLOC_001925	XLOC_001925	Mcm3ap	chr10:76449080-76515857	chr10	76449080	76515857	d8 Nkx2-5 EmGFP	CLK	OK	15.2653	22.5054	0.560011	0.463259	0.6465	0.896618	no	7.2401	66777
XLOC_001926	XLOC_001926	Lss	chr10:76531583-76562226	chr10	76531583	76562226	d8 Nkx2-5 EmGFP	CLK	OK	32.9467	29.122	-0.178022	-0.15233	0.8884	0.972422	no	3.8247	30643
XLOC_001927	XLOC_001927	1700027D21Rik	chr10:76562271-76570200	chr10	76562271	76570200	d8 Nkx2-5 EmGFP	CLK	NOTEST	0.0490945	0.00549347	-3.15977	0	1	1	no	0.043601	7929
XLOC_001928	XLOC_001928	Ftcd	chr10:76575647-76591338	chr10	76575647	76591338	d8 Nkx2-5 EmGFP	CLK	OK	0.382069	0	#NAME?	#NAME?	0.00095	0.0427945	yes	0.382069	15691
XLOC_001929	XLOC_001929	Gm10787	chr10:77011994-77022214	chr10	77011994	77022214	d8 Nkx2-5 EmGFP	CLK	NOTEST	0	0.0138613	inf	0	1	1	no	0.0138613	10220
XLOC_001930	XLOC_001930	Slc19a1	chr10:77032738-77050432	chr10	77032738	77050432	d8 Nkx2-5 EmGFP	CLK	OK	11.0179	13.2262	0.263539	0.186713	0.85555	0.964321	no	2.2083	17694
XLOC_001931	XLOC_001931	-	chr10:77226205-77244590	chr10	77226205	77244590	d8 Nkx2-5 EmGFP	CLK	NOTEST	0.0045011	0	#NAME?	0	1	1	no	0.0045011	18385
XLOC_001932	XLOC_001932	Pofut2	chr10:77259299-77269586	chr10	77259299	77269586	d8 Nkx2-5 EmGFP	CLK	OK	55.0762	17.6955	-1.63804	-1.30565	0.211	0.619513	no	37.3807	10287
XLOC_001933	XLOC_001933	Gm17769	chr10:77418375-77420939	chr10	77418375	77420939	d8 Nkx2-5 EmGFP	CLK	OK	0.0979249	0.038543	-1.34521	-0.671716	0.5964	0.874861	no	0.0593819	2564
XLOC_001934	XLOC_001934	Itgb2	chr10:77530347-77565674	chr10	77530347	77565674	d8 Nkx2-5 EmGFP	CLK	OK	0.341011	0.169757	-1.00635	-0.472484	0.66845	0.905412	no	0.171254	35327
XLOC_001935	XLOC_001935	Pttg1ip	chr10:77581685-77599701	chr10	77581685	77599701	d8 Nkx2-5 EmGFP	CLK	OK	61.0073	28.9315	-1.07634	-0.881269	0.39025	0.758374	no	32.0758	18016
XLOC_001936	XLOC_001936	Sumo3	chr10:77606233-77618331	chr10	77606233	77618331	d8 Nkx2-5 EmGFP	CLK	OK	53.5355	139.933	1.38617	1.40589	0.25555	0.660082	no	86.3975	12098
XLOC_001937	XLOC_001937	Ube2g2	chr10:77622320-77645990	chr10	77622320	77645990	d8 Nkx2-5 EmGFP	CLK	OK	34.7944	16.2208	-1.10101	-0.847058	0.4109	0.771804	no	18.5736	23670
XLOC_001938	XLOC_001938	Mir1930	chr10:77622320-77645990	chr10	77622320	77645990	d8 Nkx2-5 EmGFP	CLK	NOTEST	0	0	0	0	1	1	no	0	23670
XLOC_001939	XLOC_001939	Gm10272	chr10:77706586-77706986	chr10	77706586	77706986	d8 Nkx2-5 EmGFP	CLK	NOTEST	0	0	0	0	1	1	no	0	400
XLOC_001940	XLOC_001940	Gm10024	chr10:77711456-77712009	chr10	77711456	77712009	d8 Nkx2-5 EmGFP	CLK	NOTEST	0	0	0	0	1	1	no	0	553
XLOC_001941	XLOC_001941	Gm10142	chr10:77715806-77716169	chr10	77715806	77716169	d8 Nkx2-5 EmGFP	CLK	NOTEST	0	0	0	0	1	1	no	0	363
XLOC_001942	XLOC_001942	Krtap12-1	chr10:77720585-77721256	chr10	77720585	77721256	d8 Nkx2-5 EmGFP	CLK	NOTEST	0	0	0	0	1	1	no	0	671
XLOC_001943	XLOC_001943	Gm10100	chr10:77726485-77726848	chr10	77726485	77726848	d8 Nkx2-5 EmGFP	CLK	NOTEST	0	0	0	0	1	1	no	0	363
XLOC_001944	XLOC_001944	Gm2696	chr10:77814681-77815404	chr10	77814681	77815404	d8 Nkx2-5 EmGFP	CLK	NOTEST	0	0	0	0	1	1	no	0	723
XLOC_001945	XLOC_001945	Krtap10-10	chr10:77835946-77837251	chr10	77835946	77837251	d8 Nkx2-5 EmGFP	CLK	NOTEST	0	0	0	0	1	1	no	0	1305
XLOC_001946	XLOC_001946	Gm10318	chr10:77852858-77853788	chr10	77852858	77853788	d8 Nkx2-5 EmGFP	CLK	NOTEST	0	0	0	0	1	1	no	0	930
XLOC_001947	XLOC_001947	Gm3285	chr10:77861974-77862638	chr10	77861974	77862638	d8 Nkx2-5 EmGFP	CLK	NOTEST	0	0	0	0	1	1	no	0	664
XLOC_001948	XLOC_001948	-	chr10:77864562-77881347	chr10	77864562	77881347	d8 Nkx2-5 EmGFP	CLK	OK	0.165125	1.1173	2.75838	1.36733	0.24435	0.653825	no	0.952175	16785
XLOC_001949	XLOC_001949	1700009J07Rik	chr10:77893419-77896111	chr10	77893419	77896111	d8 Nkx2-5 EmGFP	CLK	NOTEST	0.0110105	0	#NAME?	0	1	1	no	0.0110105	2692
XLOC_001950	XLOC_001950	1810043G02Rik	chr10:77978649-77985438	chr10	77978649	77985438	d8 Nkx2-5 EmGFP	CLK	OK	9.69421	2.32136	-2.06216	-1.2557	0.2746	0.675476	no	7.37285	6789
XLOC_001951	XLOC_001951	Dnmt3l	chr10:78022747-78063615	chr10	78022747	78063615	d8 Nkx2-5 EmGFP	CLK	OK	1.96102	342.209	7.44713	4.0864	0.0158	0.206985	no	340.248	40868
XLOC_001952	XLOC_001952	Icosl	chr10:78069156-78079688	chr10	78069156	78079688	d8 Nkx2-5 EmGFP	CLK	OK	3.09012	2.58962	-0.254921	-0.151532	0.8848	0.971752	no	0.5005	10532
XLOC_001953	XLOC_001953	Cstb	chr10:78425669-78427622	chr10	78425669	78427622	d8 Nkx2-5 EmGFP	CLK	OK	116.603	59.6535	-0.966924	-1.02401	0.4865	0.818154	no	56.9495	1953
XLOC_001954	XLOC_001954	Ilvbl	chr10:78574495-78591964	chr10	78574495	78591964	d8 Nkx2-5 EmGFP	CLK	OK	24.7674	3.12714	-2.98553	-1.58504	0.1935	0.596327	no	21.6403	17469
XLOC_001955	XLOC_001955	Slc1a6	chr10:78780379-78814825	chr10	78780379	78814825	d8 Nkx2-5 EmGFP	CLK	OK	4.26404	0.709426	-2.5875	-1.38822	0.2121	0.620819	no	3.55461	34446
XLOC_001956	XLOC_001956	Olfr1355	chr10:78875548-78880106	chr10	78875548	78880106	d8 Nkx2-5 EmGFP	CLK	NOTEST	0	0	0	0	1	1	no	0	4558
XLOC_001957	XLOC_001957	Olfr1354	chr10:78916841-78917936	chr10	78916841	78917936	d8 Nkx2-5 EmGFP	CLK	NOTEST	0	0	0	0	1	1	no	0	1095
XLOC_001958	XLOC_001958	Olfr8	chr10:78955206-78956139	chr10	78955206	78956139	d8 Nkx2-5 EmGFP	CLK	NOTEST	0	0	0	0	1	1	no	0	933
XLOC_001959	XLOC_001959	Olfr1353	chr10:78963308-78970612	chr10	78963308	78970612	d8 Nkx2-5 EmGFP	CLK	NOTEST	0	0	0	0	1	1	no	0	7304
XLOC_001960	XLOC_001960	Olfr1352	chr10:78981049-78984721	chr10	78981049	78984721	d8 Nkx2-5 EmGFP	CLK	NOTEST	0	0	0	0	1	1	no	0	3672
XLOC_001961	XLOC_001961	Olfr1351	chr10:79017323-79018283	chr10	79017323	79018283	d8 Nkx2-5 EmGFP	CLK	NOTEST	0	0	0	0	1	1	no	0	960
XLOC_001962	XLOC_001962	Olfr57	chr10:79034722-79035802	chr10	79034722	79035802	d8 Nkx2-5 EmGFP	CLK	NOTEST	0	0	0	0	1	1	no	0	1080
XLOC_001963	XLOC_001963	Vmn2r80	chr10:79148815-79194933	chr10	79148815	79194933	d8 Nkx2-5 EmGFP	CLK	NOTEST	0	0	0	0	1	1	no	0	46118
XLOC_001964	XLOC_001964	Vmn2r81	chr10:79247776-79294535	chr10	79247776	79294535	d8 Nkx2-5 EmGFP	CLK	NOTEST	0	0	0	0	1	1	no	0	46759
XLOC_001965	XLOC_001965	Vmn2r82	chr10:79356590-79396766	chr10	79356590	79396766	d8 Nkx2-5 EmGFP	CLK	NOTEST	0	0	0	0	1	1	no	0	40176
XLOC_001966	XLOC_001966	Vmn2r83	chr10:79468957-79492154	chr10	79468957	79492154	d8 Nkx2-5 EmGFP	CLK	NOTEST	0	0	0	0	1	1	no	0	23197
XLOC_001967	XLOC_001967	Gm16517,Madcam1	chr10:79664315-79676128	chr10	79664315	79676128	d8 Nkx2-5 EmGFP	CLK	OK	44.9253	24.7577	-0.859649	-0.61676	0.54655	0.850568	no	20.1676	11813
XLOC_001968	XLOC_001968	Cdc34,Gzmm	chr10:79681801-79695260	chr10	79681801	79695260	d8 Nkx2-5 EmGFP	CLK	OK	115.269	246.158	1.09458	1.03037	0.3524	0.735527	no	130.889	13459
XLOC_001969	XLOC_001969	Bsg	chr10:79697304-80369637	chr10	79697304	80369637	d8 Nkx2-5 EmGFP	CLK	HIDATA	782.927	0	0	0	1	1	no	782.927	672333
XLOC_001970	XLOC_001970	Hcn2	chr10:79697304-80369637	chr10	79697304	80369637	d8 Nkx2-5 EmGFP	CLK	HIDATA	1.32732	0	0	0	1	1	no	1.32732	672333
XLOC_001971	XLOC_001971	Fgf22	chr10:79697304-80369637	chr10	79697304	80369637	d8 Nkx2-5 EmGFP	CLK	HIDATA	0.158461	0	0	0	1	1	no	0.158461	672333
XLOC_001972	XLOC_001972	Fstl3	chr10:79697304-80369637	chr10	79697304	80369637	d8 Nkx2-5 EmGFP	CLK	HIDATA	5.68404	0	0	0	1	1	no	5.68404	672333
XLOC_001973	XLOC_001973	Palm	chr10:79697304-80369637	chr10	79697304	80369637	d8 Nkx2-5 EmGFP	CLK	HIDATA	37.7852	0	0	0	1	1	no	37.7852	672333
XLOC_001974	XLOC_001974	9130017N09Rik	chr10:79697304-80369637	chr10	79697304	80369637	d8 Nkx2-5 EmGFP	CLK	HIDATA	0.267559	0	0	0	1	1	no	0.267559	672333
XLOC_001975	XLOC_001975	Ptbp1	chr10:79697304-80369637	chr10	79697304	80369637	d8 Nkx2-5 EmGFP	CLK	HIDATA	167.547	0	0	0	1	1	no	167.547	672333
XLOC_001976	XLOC_001976	Prtn3	chr10:79697304-80369637	chr10	79697304	80369637	d8 Nkx2-5 EmGFP	CLK	HIDATA	1.07275	0	0	0	1	1	no	1.07275	672333
XLOC_001977	XLOC_001977	Elane	chr10:79697304-80369637	chr10	79697304	80369637	d8 Nkx2-5 EmGFP	CLK	HIDATA	0	0	0	0	1	1	no	0	672333
XLOC_001978	XLOC_001978	Cfd	chr10:79697304-80369637	chr10	79697304	80369637	d8 Nkx2-5 EmGFP	CLK	HIDATA	0	0	0	0	1	1	no	0	672333
XLOC_001979	XLOC_001979	Kiss1r	chr10:79697304-80369637	chr10	79697304	80369637	d8 Nkx2-5 EmGFP	CLK	HIDATA	0.238383	0	0	0	1	1	no	0.238383	672333
XLOC_001980	XLOC_001980	Arid3a	chr10:79697304-80369637	chr10	79697304	80369637	d8 Nkx2-5 EmGFP	CLK	HIDATA	22.4808	0	0	0	1	1	no	22.4808	672333
XLOC_001981	XLOC_001981	Wdr18	chr10:79697304-80369637	chr10	79697304	80369637	d8 Nkx2-5 EmGFP	CLK	HIDATA	43.1017	0	0	0	1	1	no	43.1017	672333
XLOC_001982	XLOC_001982	Grin3b	chr10:79697304-80369637	chr10	79697304	80369637	d8 Nkx2-5 EmGFP	CLK	HIDATA	0.165825	0	0	0	1	1	no	0.165825	672333
XLOC_001983	XLOC_001983	Cnn2	chr10:79697304-80369637	chr10	79697304	80369637	d8 Nkx2-5 EmGFP	CLK	HIDATA	174.621	0	0	0	1	1	no	174.621	672333
XLOC_001984	XLOC_001984	Abca7	chr10:79697304-80369637	chr10	79697304	80369637	d8 Nkx2-5 EmGFP	CLK	HIDATA	6.19462	0	0	0	1	1	no	6.19462	672333
XLOC_001985	XLOC_001985	Hmha1	chr10:79697304-80369637	chr10	79697304	80369637	d8 Nkx2-5 EmGFP	CLK	HIDATA	22.4256	0	0	0	1	1	no	22.4256	672333
XLOC_001986	XLOC_001986	Gpx4	chr10:79697304-80369637	chr10	79697304	80369637	d8 Nkx2-5 EmGFP	CLK	HIDATA	57.328	0	0	0	1	1	no	57.328	672333
XLOC_001987	XLOC_001987	Stk11	chr10:79697304-80369637	chr10	79697304	80369637	d8 Nkx2-5 EmGFP	CLK	HIDATA	52.2705	0	0	0	1	1	no	52.2705	672333
XLOC_001988	XLOC_001988	Atp5d,Midn	chr10:79697304-80369637	chr10	79697304	80369637	d8 Nkx2-5 EmGFP	CLK	HIDATA	406.79	0	0	0	1	1	no	406.79	672333
XLOC_001989	XLOC_001989	1600002K03Rik,Cirbp	chr10:79697304-80369637	chr10	79697304	80369637	d8 Nkx2-5 EmGFP	CLK	HIDATA	48.8489	0	0	0	1	1	no	48.8489	672333
XLOC_001990	XLOC_001990	Efna2	chr10:79697304-80369637	chr10	79697304	80369637	d8 Nkx2-5 EmGFP	CLK	HIDATA	5.13752	0	0	0	1	1	no	5.13752	672333
XLOC_001991	XLOC_001991	Mum1	chr10:79697304-80369637	chr10	79697304	80369637	d8 Nkx2-5 EmGFP	CLK	HIDATA	14.0765	0	0	0	1	1	no	14.0765	672333
XLOC_001992	XLOC_001992	Ndufs7	chr10:79697304-80369637	chr10	79697304	80369637	d8 Nkx2-5 EmGFP	CLK	HIDATA	156.055	0	0	0	1	1	no	156.055	672333
XLOC_001993	XLOC_001993	Dazap1	chr10:79697304-80369637	chr10	79697304	80369637	d8 Nkx2-5 EmGFP	CLK	HIDATA	53.8996	0	0	0	1	1	no	53.8996	672333
XLOC_001994	XLOC_001994	Rps15	chr10:79697304-80369637	chr10	79697304	80369637	d8 Nkx2-5 EmGFP	CLK	HIDATA	808.537	0	0	0	1	1	no	808.537	672333
XLOC_001995	XLOC_001995	Apc2	chr10:79697304-80369637	chr10	79697304	80369637	d8 Nkx2-5 EmGFP	CLK	HIDATA	0.682625	0	0	0	1	1	no	0.682625	672333
XLOC_001996	XLOC_001996	Reep6	chr10:79697304-80369637	chr10	79697304	80369637	d8 Nkx2-5 EmGFP	CLK	HIDATA	10.4827	0	0	0	1	1	no	10.4827	672333
XLOC_001997	XLOC_001997	Plk5	chr10:79697304-80369637	chr10	79697304	80369637	d8 Nkx2-5 EmGFP	CLK	HIDATA	0.17113	0	0	0	1	1	no	0.17113	672333
XLOC_001998	XLOC_001998	Onecut3	chr10:80494905-80517260	chr10	80494905	80517260	d8 Nkx2-5 EmGFP	CLK	NOTEST	0.00687674	0.00534519	-0.363484	0	1	1	no	0.00153155	22355
XLOC_001999	XLOC_001999	Fam108a	chr10:80578105-80590368	chr10	80578105	80590368	d8 Nkx2-5 EmGFP	CLK	OK	0.816285	0.310074	-1.39646	-0.275006	0.81325	0.953473	no	0.506211	12263
[truncated: 27,673 more rows]

## Sheet: c-kit+ vs ESC
test_id	gene_id	gene	locus	chromosome	start	stop	sample_1	sample_2	status	value_1	value_2	log2(fold_change)	test_stat	p_value	q_value	significant	diff	Gene Length
XLOC_000001	XLOC_000001	Lypla1	chr1:4807892-4846735	chr1	4807892	4846735	d8 Nkx2-5 EmGFP	CLK	OK	46.9831	63.5933	0.436733	0.522151	0.72225	0.927531	no	16.6102	38843
XLOC_000002	XLOC_000002	Tcea1	chr1:4857255-4899149	chr1	4857255	4899149	d8 Nkx2-5 EmGFP	CLK	OK	105.319	61.3589	-0.779416	-0.668937	0.5093	0.831325	no	43.9601	41894
XLOC_000003	XLOC_000003	Atp6v1h	chr1:5083172-5162549	chr1	5083172	5162549	d8 Nkx2-5 EmGFP	CLK	OK	42.8618	39.8932	-0.103549	-0.083484	0.93285	0.983302	no	2.9686	79377
XLOC_000004	XLOC_000004	Oprk1	chr1:5588492-5606144	chr1	5588492	5606144	d8 Nkx2-5 EmGFP	CLK	OK	0.00450418	0.106626	4.56515	1.82282	0.181	0.578736	no	0.102122	17652
XLOC_000005	XLOC_000005	Rb1cc1	chr1:6209899-6276104	chr1	6209899	6276104	d8 Nkx2-5 EmGFP	CLK	OK	11.8598	2.76015	-2.10326	-1.5726	0.14295	0.511567	no	9.09965	66205
XLOC_000006	XLOC_000006	Fam150a	chr1:6358767-6394731	chr1	6358767	6394731	d8 Nkx2-5 EmGFP	CLK	OK	12.184	0.0866208	-7.13605	-3.52006	0.088	0.389269	no	12.0974	35964
XLOC_000007	XLOC_000007	St18	chr1:6487230-6860940	chr1	6487230	6860940	d8 Nkx2-5 EmGFP	CLK	NOTEST	0.00427299	0.00711563	0.735745	0	1	1	no	0.00284264	373710
XLOC_000008	XLOC_000008	Pcmtd1	chr1:7088919-7173628	chr1	7088919	7173628	d8 Nkx2-5 EmGFP	CLK	OK	4.59701	5.1502	0.16393	0.115831	0.91125	0.97778	no	0.55319	84709
XLOC_000009	XLOC_000009	-	chr1:9437166-9438141	chr1	9437166	9438141	d8 Nkx2-5 EmGFP	CLK	NOTEST	0	0	0	0	1	1	no	0	975
XLOC_000010	XLOC_000010	-	chr1:9523377-9524146	chr1	9523377	9524146	d8 Nkx2-5 EmGFP	CLK	OK	0.0323998	0.145528	2.16724	1.40385	0.479	0.813376	no	0.113128	769
XLOC_000011	XLOC_000011	-	chr1:9525809-9527049	chr1	9525809	9527049	d8 Nkx2-5 EmGFP	CLK	OK	0.0347113	0.100317	1.53109	0.731161	0.58225	0.86869	no	0.0656057	1240
XLOC_000012	XLOC_000012	Rrs1	chr1:9545407-9547455	chr1	9545407	9547455	d8 Nkx2-5 EmGFP	CLK	OK	67.0865	42.1825	-0.669376	-0.621434	0.5804	0.867873	no	24.904	2048
XLOC_000013	XLOC_000013	Adhfe1	chr1:9548045-9631580	chr1	9548045	9631580	d8 Nkx2-5 EmGFP	CLK	OK	0.157013	0.261391	0.73533	0.272417	0.8148	0.954035	no	0.104378	83535
XLOC_000014	XLOC_000014	3110035E14Rik	chr1:9548045-9631580	chr1	9548045	9631580	d8 Nkx2-5 EmGFP	CLK	NOTEST	0.0367309	0.0304018	-0.272834	0	1	1	no	0.0063291	83535
XLOC_000015	XLOC_000015	1700034P13Rik	chr1:9720716-9772521	chr1	9720716	9772521	d8 Nkx2-5 EmGFP	CLK	OK	3.46576	2.7188	-0.3502	-0.0794181	0.92855	0.982326	no	0.74696	51805
XLOC_000016	XLOC_000016	Sgk3	chr1:9798129-9902568	chr1	9798129	9902568	d8 Nkx2-5 EmGFP	CLK	OK	0.50066	2.53036	2.33744	0.991396	0.3089	0.704621	no	2.0297	104439
XLOC_000017	XLOC_000017	6030422M02Rik	chr1:9908637-9940954	chr1	9908637	9940954	d8 Nkx2-5 EmGFP	CLK	OK	0.0362972	0.0912973	1.33072	0.578451	0.5906	0.8724	no	0.0550001	32317
XLOC_000018	XLOC_000018	Cspp1	chr1:10038217-10136768	chr1	10038217	10136768	d8 Nkx2-5 EmGFP	CLK	OK	3.82617	3.32308	-0.20338	-0.138258	0.8918	0.973196	no	0.50309	98551
XLOC_000019	XLOC_000019	Prex2	chr1:10993464-11303682	chr1	10993464	11303682	d8 Nkx2-5 EmGFP	CLK	OK	0.0255711	2.20632	6.43098	3.54551	0.0209	0.229363	no	2.18075	310218
XLOC_000020	XLOC_000020	A830018L16Rik	chr1:11414104-11975902	chr1	11414104	11975902	d8 Nkx2-5 EmGFP	CLK	OK	0.0164477	0.56973	5.11432	1.52943	0.1118	0.449849	no	0.553282	561798
XLOC_000021	XLOC_000021	4932411L15	chr1:12667562-12673090	chr1	12667562	12673090	d8 Nkx2-5 EmGFP	CLK	OK	0.695974	5.11965	2.87894	1.97961	0.16475	0.553607	no	4.42368	5528
XLOC_000022	XLOC_000022	Sulf1	chr1:12692208-12861185	chr1	12692208	12861185	d8 Nkx2-5 EmGFP	CLK	OK	1.77205	29.4297	4.05378	2.82054	0.0197	0.224693	no	27.6577	168977
XLOC_000023	XLOC_000023	-	chr1:13056420-13062361	chr1	13056420	13062361	d8 Nkx2-5 EmGFP	CLK	NOTEST	0	0.0782517	inf	0	1	1	no	0.0782517	5941
XLOC_000024	XLOC_000024	Xkr9	chr1:13668770-13701723	chr1	13668770	13701723	d8 Nkx2-5 EmGFP	CLK	NOTEST	0.0130322	0.00543367	-1.26208	0	1	1	no	0.00759853	32953
XLOC_000025	XLOC_000025	Kcnb2	chr1:15312422-15714214	chr1	15312422	15714214	d8 Nkx2-5 EmGFP	CLK	NOTEST	0	0.00410733	inf	0	1	1	no	0.00410733	401792
XLOC_000026	XLOC_000026	Terf1	chr1:15803166-15843429	chr1	15803166	15843429	d8 Nkx2-5 EmGFP	CLK	OK	18.0344	35.0188	0.957377	0.729692	0.47465	0.81082	no	16.9844	40263
XLOC_000027	XLOC_000027	Rdh10	chr1:16105301-16133722	chr1	16105301	16133722	d8 Nkx2-5 EmGFP	CLK	OK	16.3209	2.01387	-3.01868	-1.82252	0.1041	0.430259	no	14.307	28421
XLOC_000028	XLOC_000028	D030040B21Rik	chr1:16657551-16662278	chr1	16657551	16662278	d8 Nkx2-5 EmGFP	CLK	NOTEST	0	0	0	0	1	1	no	0	4727
XLOC_000029	XLOC_000029	Tmem70	chr1:16665190-16678275	chr1	16665190	16678275	d8 Nkx2-5 EmGFP	CLK	OK	32.7763	8.84186	-1.89023	-1.31134	0.2122	0.620932	no	23.9344	13085
XLOC_000030	XLOC_000030	Ly96	chr1:16688105-16709605	chr1	16688105	16709605	d8 Nkx2-5 EmGFP	CLK	OK	6.28972	0.0785203	-6.32379	-2.74174	0.1044	0.430853	no	6.2112	21500
XLOC_000031	XLOC_000031	Gdap1	chr1:17145372-17164270	chr1	17145372	17164270	d8 Nkx2-5 EmGFP	CLK	NOTEST	0.0786683	0.00398651	-4.30259	0	1	1	no	0.0746818	18898
XLOC_000032	XLOC_000032	-	chr1:17253405-17395579	chr1	17253405	17395579	d8 Nkx2-5 EmGFP	CLK	OK	0	0.29582	inf	#NAME?	0.0174	0.213048	no	0.29582	142174
XLOC_000033	XLOC_000033	Pi15	chr1:17601668-17630939	chr1	17601668	17630939	d8 Nkx2-5 EmGFP	CLK	OK	8.71832	0.0144654	-9.2353	-3.5355	0.11565	0.458164	no	8.70385	29271
XLOC_000034	XLOC_000034	Crispld1	chr1:17727416-17766207	chr1	17727416	17766207	d8 Nkx2-5 EmGFP	CLK	OK	0.0557041	0.9136	4.03571	2.28507	0.13675	0.499612	no	0.857896	38791
XLOC_000035	XLOC_000035	Tfap2d	chr1:19103021-19166332	chr1	19103021	19166332	d8 Nkx2-5 EmGFP	CLK	NOTEST	0	0.0429952	inf	0	1	1	no	0.0429952	63311
XLOC_000036	XLOC_000036	Tfap2b	chr1:19208913-19238734	chr1	19208913	19238734	d8 Nkx2-5 EmGFP	CLK	NOTEST	0	0.00128064	inf	0	1	1	no	0.00128064	29821
XLOC_000037	XLOC_000037	4930486I03Rik	chr1:20057778-20618057	chr1	20057778	20618057	d8 Nkx2-5 EmGFP	CLK	NOTEST	0	0.0359763	inf	0	1	1	no	0.0359763	560279
XLOC_000038	XLOC_000038	Mir206	chr1:20679009-20679082	chr1	20679009	20679082	d8 Nkx2-5 EmGFP	CLK	NOTEST	0	0	0	0	1	1	no	0	73
XLOC_000039	XLOC_000039	Mir133b	chr1:20682768-20682887	chr1	20682768	20682887	d8 Nkx2-5 EmGFP	CLK	NOTEST	0	0	0	0	1	1	no	0	119
XLOC_000040	XLOC_000040	Il17a	chr1:20730904-20734496	chr1	20730904	20734496	d8 Nkx2-5 EmGFP	CLK	NOTEST	0	0	0	0	1	1	no	0	3592
XLOC_000041	XLOC_000041	Paqr8	chr1:20890572-20939596	chr1	20890572	20939596	d8 Nkx2-5 EmGFP	CLK	OK	1.03927	1.41666	0.446919	0.247692	0.8195	0.955438	no	0.37739	49024
XLOC_000042	XLOC_000042	Efhc1	chr1:20951625-20990841	chr1	20951625	20990841	d8 Nkx2-5 EmGFP	CLK	OK	0.182413	1.15155	2.6583	1.31735	0.2533	0.65828	no	0.969137	39216
XLOC_000043	XLOC_000043	-	chr1:21166397-21193302	chr1	21166397	21193302	d8 Nkx2-5 EmGFP	CLK	OK	0.00914603	0.258336	4.81996	1.65759	0.2922	0.69072	no	0.24919	26905
XLOC_000044	XLOC_000044	Tmem14a	chr1:21218574-21283734	chr1	21218574	21283734	d8 Nkx2-5 EmGFP	CLK	OK	1.11593	1.10358	-0.0160486	-0.00705538	0.97965	0.992918	no	0.01235	65160
XLOC_000045	XLOC_000045	Gsta3	chr1:21218574-21283734	chr1	21218574	21283734	d8 Nkx2-5 EmGFP	CLK	OK	0.0291239	2.72112	6.54585	0.806429	0.2581	0.661791	no	2.692	65160
XLOC_000046	XLOC_000046	Khdc1a	chr1:21349676-21352199	chr1	21349676	21352199	d8 Nkx2-5 EmGFP	CLK	NOTEST	0	0	0	0	1	1	no	0	2523
XLOC_000047	XLOC_000047	Khdc1c	chr1:21368330-21369743	chr1	21368330	21369743	d8 Nkx2-5 EmGFP	CLK	NOTEST	0	0	0	0	1	1	no	0	1413
XLOC_000048	XLOC_000048	Khdc1b	chr1:21383555-21386384	chr1	21383555	21386384	d8 Nkx2-5 EmGFP	CLK	NOTEST	0.00817549	0.00340201	-1.26492	0	1	1	no	0.00477348	2829
XLOC_000049	XLOC_000049	Kcnq5	chr1:21398402-21973459	chr1	21398402	21973459	d8 Nkx2-5 EmGFP	CLK	NOTEST	0	0	0	0	1	1	no	0	575057
XLOC_000050	XLOC_000050	Mir30a	chr1:23272268-23272339	chr1	23272268	23272339	d8 Nkx2-5 EmGFP	CLK	NOTEST	0	0	0	0	1	1	no	0	71
XLOC_000051	XLOC_000051	Mir30c-2	chr1:23291700-23293700	chr1	23291700	23293700	d8 Nkx2-5 EmGFP	CLK	OK	1.51548	0.103337	-3.87434	-1.57278	0.12935	0.484367	no	1.41214	2000
XLOC_000052	XLOC_000052	B3gat2	chr1:23761925-23922289	chr1	23761925	23922289	d8 Nkx2-5 EmGFP	CLK	OK	0.223028	0.0973977	-1.19527	-0.095987	0.32985	0.72048	no	0.12563	160364
XLOC_000053	XLOC_000053	Col9a1	chr1:24164450-24252738	chr1	24164450	24252738	d8 Nkx2-5 EmGFP	CLK	NOTEST	0.00246968	0.0685173	4.79407	0	1	1	no	0.0660476	88288
XLOC_000054	XLOC_000054	Lmbrd1	chr1:24678543-24766301	chr1	24678543	24766301	d8 Nkx2-5 EmGFP	CLK	OK	4.70748	2.46429	-0.933782	-0.619925	0.5472	0.851011	no	2.24319	87758
XLOC_000055	XLOC_000055	Lgsn	chr1:31141077-31222656	chr1	31141077	31222656	d8 Nkx2-5 EmGFP	CLK	OK	0.113344	0.0146043	-2.95624	-1.15045	0.372	0.747947	no	0.0987397	81579
XLOC_000056	XLOC_000056	4930521A18Rik	chr1:31222838-31224287	chr1	31222838	31224287	d8 Nkx2-5 EmGFP	CLK	NOTEST	0.00678683	0	#NAME?	0	1	1	no	0.00678683	1449
XLOC_000057	XLOC_000057	Gm4850	chr1:31264846-31268061	chr1	31264846	31268061	d8 Nkx2-5 EmGFP	CLK	NOTEST	0	0.0165671	inf	0	1	1	no	0.0165671	3215
XLOC_000058	XLOC_000058	Khdrbs2	chr1:32172805-32657738	chr1	32172805	32657738	d8 Nkx2-5 EmGFP	CLK	NOTEST	0.0511756	0	#NAME?	0	1	1	no	0.0511756	484933
XLOC_000059	XLOC_000059	1700001G17Rik	chr1:33669823-33670712	chr1	33669823	33670712	d8 Nkx2-5 EmGFP	CLK	OK	0.454322	0.059147	-2.94134	-1.78513	0.3272	0.71834	no	0.395175	889
XLOC_000060	XLOC_000060	Rab23	chr1:33719869-33742564	chr1	33719869	33742564	d8 Nkx2-5 EmGFP	CLK	OK	13.4195	9.14653	-0.553038	-0.424994	0.67555	0.907634	no	4.27297	22695
XLOC_000061	XLOC_000061	Dst	chr1:33908212-34308653	chr1	33908212	34308653	d8 Nkx2-5 EmGFP	CLK	OK	29.4388	18.8617	-0.642258	-0.540453	0.58845	0.871656	no	10.5771	400441
XLOC_000062	XLOC_000062	Imp4	chr1:34439828-34445747	chr1	34439828	34445747	d8 Nkx2-5 EmGFP	CLK	OK	42.0608	74.5711	0.826142	0.791825	0.4998	0.826551	no	32.5103	5919
XLOC_000063	XLOC_000063	Ptpn18	chr1:34459745-34474934	chr1	34459745	34474934	d8 Nkx2-5 EmGFP	CLK	OK	0.155859	0.820079	2.39552	1.1316	0.3182	0.712276	no	0.66422	15189
XLOC_000064	XLOC_000064	Prss39	chr1:34498429-34503062	chr1	34498429	34503062	d8 Nkx2-5 EmGFP	CLK	NOTEST	0	0.0740556	inf	0	1	1	no	0.0740556	4633
XLOC_000065	XLOC_000065	Cfc1	chr1:34535085-34544311	chr1	34535085	34544311	d8 Nkx2-5 EmGFP	CLK	OK	0	0.537072	inf	#NAME?	0.0058	0.123959	no	0.537072	9226
XLOC_000066	XLOC_000066	Fam123c	chr1:34578948-34591938	chr1	34578948	34591938	d8 Nkx2-5 EmGFP	CLK	NOTEST	0	0.0209339	inf	0	1	1	no	0.0209339	12990
XLOC_000067	XLOC_000067	Arhgef4	chr1:34678148-34843050	chr1	34678148	34843050	d8 Nkx2-5 EmGFP	CLK	OK	1.37648	1.25422	-0.134194	-0.0212997	0.9187	0.979489	no	0.12226	164902
XLOC_000068	XLOC_000068	Plekhb2	chr1:34849958-34879585	chr1	34849958	34879585	d8 Nkx2-5 EmGFP	CLK	OK	39.1694	8.32741	-2.23379	-1.70244	0.10915	0.442741	no	30.842	29627
XLOC_000069	XLOC_000069	Hs6st1	chr1:36068399-36106446	chr1	36068399	36106446	d8 Nkx2-5 EmGFP	CLK	OK	31.1146	28.961	-0.103479	-0.0938619	0.93235	0.983236	no	2.1536	38047
XLOC_000070	XLOC_000070	Arid5a	chr1:36307732-36324029	chr1	36307732	36324029	d8 Nkx2-5 EmGFP	CLK	OK	3.6445	0.769808	-2.24315	-1.37305	0.20005	0.605815	no	2.87469	16297
XLOC_000071	XLOC_000071	Cnnm4	chr1:36471596-36508776	chr1	36471596	36508776	d8 Nkx2-5 EmGFP	CLK	OK	3.25351	1.75031	-0.894387	-0.593694	0.6082	0.880413	no	1.5032	37180
XLOC_000072	XLOC_000072	Cnnm3	chr1:36511467-36528237	chr1	36511467	36528237	d8 Nkx2-5 EmGFP	CLK	OK	3.22383	9.33029	1.53314	1.09666	0.3028	0.699763	no	6.10646	16770
XLOC_000073	XLOC_000073	Cox5b	chr1:36691450-36694382	chr1	36691450	36694382	d8 Nkx2-5 EmGFP	CLK	OK	191.632	422.689	1.14125	0.957925	0.34865	0.733045	no	231.057	2932
XLOC_000074	XLOC_000074	4933424G06Rik	chr1:36714537-36757960	chr1	36714537	36757960	d8 Nkx2-5 EmGFP	CLK	NOTEST	0.0163424	0.00658826	-1.31065	0	1	1	no	0.00975414	43423
XLOC_000075	XLOC_000075	Zap70	chr1:36761860-36782816	chr1	36761860	36782816	d8 Nkx2-5 EmGFP	CLK	OK	0	1.15819	inf	#NAME?	0.0007	0.0349902	yes	1.15819	20956
XLOC_000076	XLOC_000076	-	chr1:37085282-37141190	chr1	37085282	37141190	d8 Nkx2-5 EmGFP	CLK	OK	0	4.69241	inf	#NAME?	0.0002	0.0131954	yes	4.69241	55908
XLOC_000077	XLOC_000077	Cnga3	chr1:37219260-37263384	chr1	37219260	37263384	d8 Nkx2-5 EmGFP	CLK	OK	0.024048	0.931974	5.2763	2.61543	0.107	0.437651	no	0.907926	44124
XLOC_000078	XLOC_000078	Inpp4a	chr1:37299892-37410735	chr1	37299892	37410735	d8 Nkx2-5 EmGFP	CLK	OK	1.14955	0.329787	-1.80146	-0.925549	0.3909	0.758665	no	0.819763	110843
XLOC_000079	XLOC_000079	Unc50	chr1:37430171-37439124	chr1	37430171	37439124	d8 Nkx2-5 EmGFP	CLK	OK	25.4984	11.1838	-1.18899	-0.798214	0.444	0.790238	no	14.3146	8953
XLOC_000080	XLOC_000080	Lipt1	chr1:37871629-37898333	chr1	37871629	37898333	d8 Nkx2-5 EmGFP	CLK	OK	7.0178	6.38809	-0.135634	-0.0434207	0.97135	0.990796	no	0.62971	26704
XLOC_000081	XLOC_000081	Mrpl30	chr1:37871629-37898333	chr1	37871629	37898333	d8 Nkx2-5 EmGFP	CLK	OK	99.5305	91.1083	-0.127555	-0.0860924	0.93595	0.983662	no	8.4222	26704
XLOC_000082	XLOC_000082	Eif5b	chr1:37998009-38129662	chr1	37998009	38129662	d8 Nkx2-5 EmGFP	CLK	OK	31.133	23.1377	-0.428198	-0.335576	0.73795	0.932422	no	7.9953	131653
XLOC_000083	XLOC_000083	Nms	chr1:38939148-38950276	chr1	38939148	38950276	d8 Nkx2-5 EmGFP	CLK	NOTEST	0	0	0	0	1	1	no	0	11128
XLOC_000084	XLOC_000084	Pdcl3	chr1:38987813-38997236	chr1	38987813	38997236	d8 Nkx2-5 EmGFP	CLK	OK	39.1568	21.3261	-0.876644	-0.772551	0.51435	0.833655	no	17.8307	9423
XLOC_000085	XLOC_000085	Npas2	chr1:39194271-39363240	chr1	39194271	39363240	d8 Nkx2-5 EmGFP	CLK	NOTEST	0	0.0302727	inf	0	1	1	no	0.0302727	168969
XLOC_000086	XLOC_000086	Rpl31	chr1:39367850-39478747	chr1	39367850	39478747	d8 Nkx2-5 EmGFP	CLK	OK	766.504	614.083	-0.31986	-0.355415	0.78305	0.945738	no	152.421	110897
XLOC_000087	XLOC_000087	D1Bwg0212e	chr1:39535801-39546877	chr1	39535801	39546877	d8 Nkx2-5 EmGFP	CLK	OK	15.5519	28.087	0.852812	0.768318	0.51185	0.832551	no	12.5351	11076
XLOC_000088	XLOC_000088	Rfx8	chr1:39655255-39720989	chr1	39655255	39720989	d8 Nkx2-5 EmGFP	CLK	OK	0	0.325654	inf	#NAME?	0.12925	0.484202	no	0.325654	65734
XLOC_000089	XLOC_000089	Map4k4	chr1:39900899-40026310	chr1	39900899	40026310	d8 Nkx2-5 EmGFP	CLK	FAIL	76.6166	0	0	0	1	1	no	76.6166	125411
XLOC_000090	XLOC_000090	Il1r2	chr1:40076211-40125226	chr1	40076211	40125226	d8 Nkx2-5 EmGFP	CLK	OK	0.00641263	0.748338	6.86663	2.86846	0.25925	0.662531	no	0.741925	49015
XLOC_000091	XLOC_000091	Il1r1	chr1:40225079-40316184	chr1	40225079	40316184	d8 Nkx2-5 EmGFP	CLK	OK	6.30373	0.125391	-5.6517	-3.15603	0.0174	0.213048	no	6.17834	91105
XLOC_000092	XLOC_000092	Il1rl2	chr1:40324519-40367540	chr1	40324519	40367540	d8 Nkx2-5 EmGFP	CLK	OK	1.46794	0.117636	-3.6414	-1.82251	0.1201	0.467696	no	1.3503	43021
XLOC_000093	XLOC_000093	Il1rl1	chr1:40435893-40465414	chr1	40435893	40465414	d8 Nkx2-5 EmGFP	CLK	OK	62.0491	0.00281665	-14.4271	-5.13184	0.16825	0.558925	no	62.0463	29521
XLOC_000094	XLOC_000094	Il18r1	chr1:40465551-40500854	chr1	40465551	40500854	d8 Nkx2-5 EmGFP	CLK	OK	1.33973	0	#NAME?	#NAME?	0.0005	0.0273862	yes	1.33973	35303
XLOC_000095	XLOC_000095	Il18rap	chr1:40515361-40549297	chr1	40515361	40549297	d8 Nkx2-5 EmGFP	CLK	OK	19	0.0267335	-9.47314	-5.13758	0.0996	0.419174	no	18.9733	33936
XLOC_000096	XLOC_000096	Slc9a4	chr1:40580226-40630731	chr1	40580226	40630731	d8 Nkx2-5 EmGFP	CLK	NOTEST	0.00234255	0	#NAME?	0	1	1	no	0.00234255	50505
XLOC_000097	XLOC_000097	Slc9a2	chr1:40681711-40768885	chr1	40681711	40768885	d8 Nkx2-5 EmGFP	CLK	OK	0.0381846	0.0885748	1.2139	0.611239	0.6302	0.889545	no	0.0503902	87174
XLOC_000098	XLOC_000098	Tmem182	chr1:40805600-40855267	chr1	40805600	40855267	d8 Nkx2-5 EmGFP	CLK	NOTEST	0	0	0	0	1	1	no	0	49667
XLOC_000099	XLOC_000099	-	chr1:42695729-42696892	chr1	42695729	42696892	d8 Nkx2-5 EmGFP	CLK	OK	0.164481	0.0507826	-1.69552	-0.815694	0.5302	0.842019	no	0.113698	1163
XLOC_000100	XLOC_000100	Pou3f3	chr1:42697145-42700209	chr1	42697145	42700209	d8 Nkx2-5 EmGFP	CLK	OK	0.18954	0.0410937	-2.20551	-1.19153	0.3958	0.761762	no	0.148446	3064
XLOC_000101	XLOC_000101	2900092D14Rik	chr1:42700335-42703176	chr1	42700335	42703176	d8 Nkx2-5 EmGFP	CLK	NOTEST	0.00927768	0.00397181	-1.22397	0	1	1	no	0.00530587	2841
XLOC_000102	XLOC_000102	Mrps9	chr1:42851232-42905683	chr1	42851232	42905683	d8 Nkx2-5 EmGFP	CLK	OK	27.2512	39.4433	0.53346	0.446608	0.6924	0.914428	no	12.1921	54451
XLOC_000103	XLOC_000103	Gpr45	chr1:42952871-43035449	chr1	42952871	43035449	d8 Nkx2-5 EmGFP	CLK	OK	0.249051	0.154255	-0.691131	-0.326404	0.76525	0.941555	no	0.094796	82578
XLOC_000104	XLOC_000104	AI597479	chr1:43098709-43115946	chr1	43098709	43115946	d8 Nkx2-5 EmGFP	CLK	OK	8.17639	7.63756	-0.0983533	-0.0914933	0.94545	0.985533	no	0.53883	17237
XLOC_000105	XLOC_000105	Nck2	chr1:43445750-43570518	chr1	43445750	43570518	d8 Nkx2-5 EmGFP	CLK	OK	2.87046	3.4459	0.263599	0.154626	0.88035	0.970944	no	0.57544	124768
XLOC_000106	XLOC_000106	1500015O10Rik	chr1:43730601-43742564	chr1	43730601	43742564	d8 Nkx2-5 EmGFP	CLK	OK	0.0114671	0.543421	5.56649	2.88766	0.2849	0.684605	no	0.531954	11963
XLOC_000107	XLOC_000107	Tpp2	chr1:43932261-44003179	chr1	43932261	44003179	d8 Nkx2-5 EmGFP	CLK	OK	44.7836	36.641	-0.289509	-0.249521	0.8065	0.952012	no	8.1426	70918
XLOC_000108	XLOC_000108	Bivm	chr1:44119967-44144771	chr1	44119967	44144771	d8 Nkx2-5 EmGFP	CLK	OK	6.82278	5.01648	-0.443685	-0.364136	0.7728	0.943701	no	1.8063	24804
XLOC_000109	XLOC_000109	Ercc5	chr1:44147743-44181260	chr1	44147743	44181260	d8 Nkx2-5 EmGFP	CLK	OK	5.34958	5.23227	-0.0319899	-0.021665	0.97975	0.992918	no	0.11731	33517
XLOC_000110	XLOC_000110	Gulp1	chr1:44551670-44796836	chr1	44551670	44796836	d8 Nkx2-5 EmGFP	CLK	OK	13.1621	1.19722	-3.45862	-2.06688	0.075	0.351564	no	11.9649	245166
XLOC_000111	XLOC_000111	Col3a1	chr1:45311537-45349706	chr1	45311537	45349706	d8 Nkx2-5 EmGFP	CLK	OK	45.995	0.800735	-5.84401	-3.6236	0.0077	0.144812	no	45.1943	38169
XLOC_000112	XLOC_000112	Wdr75	chr1:45795500-45823613	chr1	45795500	45823613	d8 Nkx2-5 EmGFP	CLK	OK	47.6274	61.9123	0.378432	0.342839	0.7525	0.937348	no	14.2849	28113
XLOC_000113	XLOC_000113	Dnahc7b	chr1:46066251-46373632	chr1	46066251	46373632	d8 Nkx2-5 EmGFP	CLK	NOTEST	0.0428496	0.0415845	-0.0432345	0	1	1	no	0.0012651	307381
XLOC_000114	XLOC_000114	Tmeff2	chr1:50927365-51187270	chr1	50927365	51187270	d8 Nkx2-5 EmGFP	CLK	OK	2.1366	0.891095	-1.26167	-0.55494	0.58075	0.867883	no	1.24551	259905
XLOC_000115	XLOC_000115	Sdpr	chr1:51218385-51333779	chr1	51218385	51333779	d8 Nkx2-5 EmGFP	CLK	OK	210.04	0.015922	-13.6874	-7.49262	0.1315	0.488796	no	210.024	115394
XLOC_000116	XLOC_000116	Stat4	chr1:52008243-52107184	chr1	52008243	52107184	d8 Nkx2-5 EmGFP	CLK	OK	0.00866701	4.21438	8.92557	4.21794	0.1816	0.57986	no	4.20571	98941
XLOC_000117	XLOC_000117	Stat1	chr1:52119437-52161865	chr1	52119437	52161865	d8 Nkx2-5 EmGFP	CLK	OK	7.95918	7.29819	-0.125082	-0.0877759	0.9271	0.981887	no	0.66099	42428
XLOC_000118	XLOC_000118	Tmem194b	chr1:52630698-52652171	chr1	52630698	52652171	d8 Nkx2-5 EmGFP	CLK	OK	1.17885	1.60245	0.442897	0.229701	0.82295	0.955936	no	0.4236	21473
XLOC_000119	XLOC_000119	Hibch	chr1:52845041-52920860	chr1	52845041	52920860	d8 Nkx2-5 EmGFP	CLK	OK	3.60463	5.06893	0.491828	0.280816	0.79215	0.94836	no	1.4643	75819
XLOC_000120	XLOC_000120	Mstn	chr1:53061662-53068079	chr1	53061662	53068079	d8 Nkx2-5 EmGFP	CLK	NOTEST	0	0	0	0	1	1	no	0	6417
XLOC_000121	XLOC_000121	Ormdl1	chr1:53297094-53310245	chr1	53297094	53310245	d8 Nkx2-5 EmGFP	CLK	OK	14.5122	5.90357	-1.29761	-1.17568	0.43405	0.784761	no	8.60863	13151
XLOC_000122	XLOC_000122	Osgepl1	chr1:53312569-53326280	chr1	53312569	53326280	d8 Nkx2-5 EmGFP	CLK	OK	3.29226	2.77367	-0.247281	-0.138991	0.8994	0.974964	no	0.51859	13711
XLOC_000123	XLOC_000123	Ccdc150	chr1:54250682-54368727	chr1	54250682	54368727	d8 Nkx2-5 EmGFP	CLK	NOTEST	0.00359202	0.0196583	2.45227	0	1	1	no	0.0160663	118045
XLOC_000124	XLOC_000124	Coq10b	chr1:55052769-55072702	chr1	55052769	55072702	d8 Nkx2-5 EmGFP	CLK	OK	29.8518	13.1321	-1.18472	-0.848463	0.4212	0.778071	no	16.7197	19933
XLOC_000125	XLOC_000125	Hspe1	chr1:55087988-55091450	chr1	55087988	55091450	d8 Nkx2-5 EmGFP	CLK	OK	457.296	658.332	0.525685	0.463937	0.64605	0.896404	no	201.036	3462
XLOC_000126	XLOC_000126	Mob4	chr1:55131222-55159644	chr1	55131222	55159644	d8 Nkx2-5 EmGFP	CLK	OK	26.5366	10.7192	-1.30778	-0.981818	0.34705	0.732662	no	15.8174	28422
XLOC_000127	XLOC_000127	Mars2	chr1:55170159-55244240	chr1	55170159	55244240	d8 Nkx2-5 EmGFP	CLK	OK	11.2173	5.54299	-1.01698	-0.663257	0.52305	0.837869	no	5.67431	74081
XLOC_000128	XLOC_000128	Plcl1	chr1:55405945-55754285	chr1	55405945	55754285	d8 Nkx2-5 EmGFP	CLK	NOTEST	0.0156291	0.0736124	2.23572	0	1	1	no	0.0579833	348340
XLOC_000129	XLOC_000129	9130227L01Rik	chr1:55931240-55972098	chr1	55931240	55972098	d8 Nkx2-5 EmGFP	CLK	NOTEST	0.0106016	0	#NAME?	0	1	1	no	0.0106016	40858
XLOC_000130	XLOC_000130	-	chr1:56681205-56686378	chr1	56681205	56686378	d8 Nkx2-5 EmGFP	CLK	OK	0.405833	0	#NAME?	#NAME?	0.0125	0.184362	no	0.405833	5173
XLOC_000131	XLOC_000131	9130024F11Rik	chr1:56793980-56980414	chr1	56793980	56980414	d8 Nkx2-5 EmGFP	CLK	OK	0.834025	0.084857	-3.29699	-0.598016	0.61945	0.885032	no	0.749168	186434
XLOC_000132	XLOC_000132	1700066M21Rik	chr1:57377619-57385422	chr1	57377619	57385422	d8 Nkx2-5 EmGFP	CLK	OK	7.83092	1.05258	-2.89525	-1.69484	0.12985	0.485311	no	6.77834	7803
XLOC_000133	XLOC_000133	9430016H08Rik	chr1:57388243-57415958	chr1	57388243	57415958	d8 Nkx2-5 EmGFP	CLK	OK	13.1099	19.7318	0.589865	0.357272	0.735	0.931831	no	6.6219	27715
XLOC_000134	XLOC_000134	Spats2l	chr1:57774682-57948428	chr1	57774682	57948428	d8 Nkx2-5 EmGFP	CLK	OK	0.316928	1.63371	2.36592	1.23098	0.2629	0.666183	no	1.31678	173746
XLOC_000135	XLOC_000135	Sgol2	chr1:57985339-58026277	chr1	57985339	58026277	d8 Nkx2-5 EmGFP	CLK	OK	14.6115	7.16254	-1.02856	-0.793941	0.44385	0.790111	no	7.44896	40938
XLOC_000136	XLOC_000136	Aox1	chr1:58029802-58106410	chr1	58029802	58106410	d8 Nkx2-5 EmGFP	CLK	OK	1.08031	0.0949539	-3.50807	-1.74516	0.14035	0.506297	no	0.985356	76608
XLOC_000137	XLOC_000137	Aox3	chr1:58113135-58200452	chr1	58113135	58200452	d8 Nkx2-5 EmGFP	CLK	OK	0.0073788	0.464864	5.97728	2.71019	0.17915	0.5754	no	0.457485	87317
XLOC_000138	XLOC_000138	Aox4	chr1:58210396-58268596	chr1	58210396	58268596	d8 Nkx2-5 EmGFP	CLK	OK	0.0185812	0.197221	3.4079	1.58931	0.20385	0.610915	no	0.17864	58200
XLOC_000139	XLOC_000139	Aox3l1	chr1:58278325-58379264	chr1	58278325	58379264	d8 Nkx2-5 EmGFP	CLK	NOTEST	0.00162688	0	#NAME?	0	1	1	no	0.00162688	100939
XLOC_000140	XLOC_000140	Bzw1	chr1:58391409-58407864	chr1	58391409	58407864	d8 Nkx2-5 EmGFP	CLK	OK	254.729	112.374	-1.18065	-1.02449	0.31635	0.710864	no	142.355	16455
XLOC_000141	XLOC_000141	Nif3l1	chr1:58430992-58505102	chr1	58430992	58505102	d8 Nkx2-5 EmGFP	CLK	OK	21.4543	32.2321	0.587229	0.283012	0.79555	0.948908	no	10.7778	74110
XLOC_000142	XLOC_000142	Ndufb3	chr1:58522671-58595948	chr1	58522671	58595948	d8 Nkx2-5 EmGFP	CLK	OK	84.5476	67.7432	-0.319687	-0.195476	0.85315	0.963864	no	16.8044	73277
XLOC_000143	XLOC_000143	Gm20257	chr1:58651881-58695989	chr1	58651881	58695989	d8 Nkx2-5 EmGFP	CLK	OK	1.81966	0	#NAME?	#NAME?	0.13105	0.487841	no	1.81966	44108
XLOC_000144	XLOC_000144	Cflar	chr1:58711528-58758882	chr1	58711528	58758882	d8 Nkx2-5 EmGFP	CLK	OK	40.3894	4.02821	-3.32577	-2.20935	0.02765	0.246871	no	36.3612	47354
XLOC_000145	XLOC_000145	Casp8	chr1:58795373-58856945	chr1	58795373	58856945	d8 Nkx2-5 EmGFP	CLK	OK	26.3578	1.00427	-4.71401	-2.85323	0.02785	0.247984	no	25.3535	61572
XLOC_000146	XLOC_000146	Stradb	chr1:58973570-58995121	chr1	58973570	58995121	d8 Nkx2-5 EmGFP	CLK	OK	6.30324	5.67218	-0.152189	-0.0917328	0.92635	0.981676	no	0.63106	21551
XLOC_000147	XLOC_000147	Cdk15	chr1:59256906-59352369	chr1	59256906	59352369	d8 Nkx2-5 EmGFP	CLK	NOTEST	0.00579805	0.0328171	2.50081	0	1	1	no	0.0270191	95463
XLOC_000148	XLOC_000148	Fzd7	chr1:59480388-59489692	chr1	59480388	59489692	d8 Nkx2-5 EmGFP	CLK	OK	7.39147	28.6644	1.95533	1.53103	0.14735	0.520676	no	21.2729	9304
XLOC_000149	XLOC_000149	Gm973	chr1:59516263-59636397	chr1	59516263	59636397	d8 Nkx2-5 EmGFP	CLK	OK	0	0.242276	inf	#NAME?	0.00415	0.105239	no	0.242276	120134
XLOC_000150	XLOC_000150	Nop58	chr1:59685005-59711510	chr1	59685005	59711510	d8 Nkx2-5 EmGFP	CLK	OK	143.886	88.4614	-0.701809	-0.611463	0.5468	0.850738	no	55.4246	26505
XLOC_000151	XLOC_000151	Snord70	chr1:59685005-59711510	chr1	59685005	59711510	d8 Nkx2-5 EmGFP	CLK	NOTEST	0	0	0	0	1	1	no	0	26505
XLOC_000152	XLOC_000152	Snord11	chr1:59685005-59711510	chr1	59685005	59711510	d8 Nkx2-5 EmGFP	CLK	NOTEST	0	0	0	0	1	1	no	0	26505
XLOC_000153	XLOC_000153	Bmpr2	chr1:59763422-59877868	chr1	59763422	59877868	d8 Nkx2-5 EmGFP	CLK	OK	6.36414	2.81705	-1.17578	-0.862084	0.39045	0.758446	no	3.54709	114446
XLOC_000154	XLOC_000154	Fam117b	chr1:59913005-59985346	chr1	59913005	59985346	d8 Nkx2-5 EmGFP	CLK	OK	8.11933	9.37399	0.207302	0.196064	0.88125	0.971089	no	1.25466	72341
XLOC_000155	XLOC_000155	Carf	chr1:60074704-60151034	chr1	60074704	60151034	d8 Nkx2-5 EmGFP	CLK	OK	0.523572	0.220338	-1.24867	-0.0766938	0.3203	0.71327	no	0.303234	76330
XLOC_000156	XLOC_000156	Nbeal1	chr1:60180585-60338292	chr1	60180585	60338292	d8 Nkx2-5 EmGFP	CLK	OK	2.6812	1.20296	-1.15629	-0.810843	0.4273	0.781715	no	1.47824	157707
XLOC_000157	XLOC_000157	Cyp20a1	chr1:60342846-60388058	chr1	60342846	60388058	d8 Nkx2-5 EmGFP	CLK	OK	38.3199	9.02357	-2.08632	-1.46624	0.15915	0.543556	no	29.2963	45212
XLOC_000158	XLOC_000158	Abi2	chr1:60409575-60566765	chr1	60409575	60566765	d8 Nkx2-5 EmGFP	CLK	OK	6.84928	6.16213	-0.152523	-0.0808749	0.95285	0.987009	no	0.68715	157190
XLOC_000159	XLOC_000159	Cd28	chr1:60746387-60773359	chr1	60746387	60773359	d8 Nkx2-5 EmGFP	CLK	NOTEST	0.0165788	0.0219039	0.401844	0	1	1	no	0.0053251	26972
XLOC_000160	XLOC_000160	Ctla4	chr1:60909024-60915830	chr1	60909024	60915830	d8 Nkx2-5 EmGFP	CLK	NOTEST	0	0	0	0	1	1	no	0	6806
XLOC_000161	XLOC_000161	Icos	chr1:60977913-61000321	chr1	60977913	61000321	d8 Nkx2-5 EmGFP	CLK	NOTEST	0	0.0147237	inf	0	1	1	no	0.0147237	22408
XLOC_000162	XLOC_000162	9530026F06Rik	chr1:61378431-61395904	chr1	61378431	61395904	d8 Nkx2-5 EmGFP	CLK	NOTEST	0	0	0	0	1	1	no	0	17473
XLOC_000163	XLOC_000163	Pard3b	chr1:61638823-62642284	chr1	61638823	62642284	d8 Nkx2-5 EmGFP	CLK	OK	0.889784	0.193045	-2.20451	-0.642232	0.3914	0.758785	no	0.696739	1003461
XLOC_000164	XLOC_000164	Nrp2	chr1:62703268-62818692	chr1	62703268	62818692	d8 Nkx2-5 EmGFP	CLK	OK	39.9462	9.35815	-2.09376	-1.73743	0.09955	0.41908	no	30.588	115424
XLOC_000165	XLOC_000165	Gm11602	chr1:63114405-63176822	chr1	63114405	63176822	d8 Nkx2-5 EmGFP	CLK	OK	0.650848	0.244473	-1.41265	-0.10813	0.48485	0.816881	no	0.406375	62417
XLOC_000166	XLOC_000166	Eef1b2	chr1:63176830-63180486	chr1	63176830	63180486	d8 Nkx2-5 EmGFP	CLK	OK	482.097	948.682	0.976601	0.838943	0.414	0.773132	no	466.585	3656
XLOC_000167	XLOC_000167	Snora41	chr1:63176830-63180486	chr1	63176830	63180486	d8 Nkx2-5 EmGFP	CLK	NOTEST	0	0	0	0	1	1	no	0	3656
XLOC_000168	XLOC_000168	Zdbf2	chr1:63273268-63314575	chr1	63273268	63314575	d8 Nkx2-5 EmGFP	CLK	OK	0.00299515	9.76438	11.6707	6.00568	0.12695	0.480334	no	9.76138	41307
XLOC_000169	XLOC_000169	-	chr1:63439083-63445676	chr1	63439083	63445676	d8 Nkx2-5 EmGFP	CLK	OK	0	0.700442	inf	#NAME?	0.0138	0.193063	no	0.700442	6593
XLOC_000170	XLOC_000170	Adam23	chr1:63445864-63596515	chr1	63445864	63596515	d8 Nkx2-5 EmGFP	CLK	OK	0.00886059	22.4169	11.3049	5.66143	0.0766	0.356418	no	22.408	150651
XLOC_000171	XLOC_000171	Fastkd2	chr1:63730428-63769267	chr1	63730428	63769267	d8 Nkx2-5 EmGFP	CLK	OK	10.0704	15.811	0.65081	0.576087	0.6365	0.892297	no	5.7406	38839
XLOC_000172	XLOC_000172	Gm13749	chr1:63964726-63968999	chr1	63964726	63968999	d8 Nkx2-5 EmGFP	CLK	NOTEST	0	0	0	0	1	1	no	0	4273
XLOC_000173	XLOC_000173	Creb1	chr1:64532803-64604548	chr1	64532803	64604548	d8 Nkx2-5 EmGFP	CLK	OK	10.69	5.98284	-0.837361	-0.657839	0.52725	0.840323	no	4.70716	71745
XLOC_000174	XLOC_000174	Ccnyl1	chr1:64691344-64725646	chr1	64691344	64725646	d8 Nkx2-5 EmGFP	CLK	OK	51.1382	10.1939	-2.32669	-1.81	0.09265	0.402036	no	40.9443	34302
XLOC_000175	XLOC_000175	Pikfyve	chr1:65186652-65278696	chr1	65186652	65278696	d8 Nkx2-5 EmGFP	CLK	OK	3.10438	2.35696	-0.397379	-0.288617	0.77665	0.944893	no	0.74742	92044
XLOC_000176	XLOC_000176	Pth2r	chr1:65311256-65389244	chr1	65311256	65389244	d8 Nkx2-5 EmGFP	CLK	NOTEST	0.0149045	0.069134	2.21365	0	1	1	no	0.0542295	77988
XLOC_000177	XLOC_000177	Crygf	chr1:65926521-65928304	chr1	65926521	65928304	d8 Nkx2-5 EmGFP	CLK	NOTEST	0	0	0	0	1	1	no	0	1783
XLOC_000178	XLOC_000178	Mtap2	chr1:66175311-66442585	chr1	66175311	66442585	d8 Nkx2-5 EmGFP	CLK	OK	0.401964	2.94009	2.87072	1.6259	0.14115	0.508215	no	2.53813	267274
XLOC_000179	XLOC_000179	Unc80	chr1:66468358-66699148	chr1	66468358	66699148	d8 Nkx2-5 EmGFP	CLK	NOTEST	0	0.0734713	inf	0	1	1	no	0.0734713	230790
XLOC_000180	XLOC_000180	Rpe	chr1:66700892-66817595	chr1	66700892	66817595	d8 Nkx2-5 EmGFP	CLK	OK	21.3896	11.3988	-0.908031	-0.835153	0.54655	0.850568	no	9.9908	116703
XLOC_000181	XLOC_000181	Cps1	chr1:67123065-67231169	chr1	67123065	67231169	d8 Nkx2-5 EmGFP	CLK	OK	0.00335279	0.19984	5.89734	2.48121	0.1841	0.583083	no	0.196487	108104
XLOC_000182	XLOC_000182	Spag16	chr1:69826972-70725132	chr1	69826972	70725132	d8 Nkx2-5 EmGFP	CLK	OK	0	0.441214	inf	#NAME?	0.0021	0.0671922	no	0.441214	898160
XLOC_000183	XLOC_000183	Vwc2l	chr1:70725714-70885397	chr1	70725714	70885397	d8 Nkx2-5 EmGFP	CLK	NOTEST	0.00203347	0	#NAME?	0	1	1	no	0.00203347	159683
XLOC_000184	XLOC_000184	Atic	chr1:71556996-71580201	chr1	71556996	71580201	d8 Nkx2-5 EmGFP	CLK	OK	191.798	275.383	0.521851	0.457393	0.65345	0.89912	no	83.585	23205
XLOC_000185	XLOC_000185	Apol7d	chr1:71653334-71662843	chr1	71653334	71662843	d8 Nkx2-5 EmGFP	CLK	OK	0.0930624	0.106471	0.194188	0.0870494	0.89355	0.973595	no	0.0134086	9509
XLOC_000186	XLOC_000186	Gm8883	chr1:71888111-71891204	chr1	71888111	71891204	d8 Nkx2-5 EmGFP	CLK	NOTEST	0	0	0	0	1	1	no	0	3093
XLOC_000187	XLOC_000187	Tmem169	chr1:72284372-72303052	chr1	72284372	72303052	d8 Nkx2-5 EmGFP	CLK	OK	0.0513023	0.0803176	0.646691	0.29972	0.7886	0.947398	no	0.0290153	18680
XLOC_000188	XLOC_000188	Xrcc5	chr1:72307420-72394953	chr1	72307420	72394953	d8 Nkx2-5 EmGFP	CLK	OK	13.2711	52.6619	1.98847	1.67578	0.1392	0.504008	no	39.3908	87533
XLOC_000189	XLOC_000189	Smarcal1	chr1:72583250-72636790	chr1	72583250	72636790	d8 Nkx2-5 EmGFP	CLK	OK	3.04675	7.62626	1.3237	1.03635	0.35765	0.738905	no	4.57951	53540
XLOC_000190	XLOC_000190	Rpl37a	chr1:72711234-72713818	chr1	72711234	72713818	d8 Nkx2-5 EmGFP	CLK	OK	1110.78	2145.7	0.949874	0.8266	0.4219	0.778557	no	1034.92	2584
XLOC_000191	XLOC_000191	Igfbp2	chr1:72824479-72852471	chr1	72824479	72852471	d8 Nkx2-5 EmGFP	CLK	OK	0	336.677	inf	#NAME?	5e-05	0.00396813	yes	336.677	27992
XLOC_000192	XLOC_000192	1700027A15Rik	chr1:73016035-73025508	chr1	73016035	73025508	d8 Nkx2-5 EmGFP	CLK	NOTEST	0.0327572	0	#NAME?	0	1	1	no	0.0327572	9473
XLOC_000193	XLOC_000193	D530049I02Rik	chr1:73391384-73430779	chr1	73391384	73430779	d8 Nkx2-5 EmGFP	CLK	NOTEST	0	0	0	0	1	1	no	0	39395
XLOC_000194	XLOC_000194	Rufy4	chr1:74124715-74148230	chr1	74124715	74148230	d8 Nkx2-5 EmGFP	CLK	OK	0.132818	0.053196	-1.32006	-0.612038	0.55875	0.857146	no	0.079622	23515
XLOC_000195	XLOC_000195	Cxcr2	chr1:74153993-74161246	chr1	74153993	74161246	d8 Nkx2-5 EmGFP	CLK	OK	0.111308	1.38902	3.64143	2.04982	0.1472	0.520479	no	1.27771	7253
XLOC_000196	XLOC_000196	Arpc2	chr1:74236488-74268213	chr1	74236488	74268213	d8 Nkx2-5 EmGFP	CLK	OK	294.018	126.987	-1.21123	-1.04807	0.3054	0.702078	no	167.031	31725
XLOC_000197	XLOC_000197	Gpbar1	chr1:74277078-74279794	chr1	74277078	74279794	d8 Nkx2-5 EmGFP	CLK	OK	0.181144	0.161573	-0.164955	-0.0758728	0.94235	0.984722	no	0.019571	2716
XLOC_000198	XLOC_000198	Pnkd	chr1:74285033-74353692	chr1	74285033	74353692	d8 Nkx2-5 EmGFP	CLK	OK	19.5485	33.001	0.755452	0.285971	0.78075	0.945595	no	13.4525	68659
XLOC_000199	XLOC_000199	Gm216	chr1:74362107-74369321	chr1	74362107	74369321	d8 Nkx2-5 EmGFP	CLK	OK	0.314294	0.519373	0.724657	0.336108	0.7493	0.936308	no	0.205079	7214
XLOC_000200	XLOC_000200	Slc11a1	chr1:74375202-74386051	chr1	74375202	74386051	d8 Nkx2-5 EmGFP	CLK	OK	0.54439	0.609788	0.163666	0.0807783	0.9404	0.984368	no	0.065398	10849
XLOC_000201	XLOC_000201	Ctdsp1	chr1:74387931-74397285	chr1	74387931	74397285	d8 Nkx2-5 EmGFP	CLK	OK	59.4384	28.2679	-1.07223	-0.893619	0.3892	0.757669	no	31.1705	9354
XLOC_000202	XLOC_000202	Mir26b	chr1:74387931-74397285	chr1	74387931	74397285	d8 Nkx2-5 EmGFP	CLK	NOTEST	0	0	0	0	1	1	no	0	9354
XLOC_000203	XLOC_000203	Vil1	chr1:74409249-74593723	chr1	74409249	74593723	d8 Nkx2-5 EmGFP	CLK	OK	0.0313386	0.983872	4.97246	0.131416	0.24875	0.656973	no	0.952533	184474
XLOC_000204	XLOC_000204	Rqcd1	chr1:74409249-74593723	chr1	74409249	74593723	d8 Nkx2-5 EmGFP	CLK	OK	39.1549	61.0838	0.641599	0.471302	0.689	0.913039	no	21.9289	184474
XLOC_000205	XLOC_000205	Plcd4	chr1:74409249-74593723	chr1	74409249	74593723	d8 Nkx2-5 EmGFP	CLK	OK	0.325577	0.37919	0.219923	0.0122381	0.32535	0.716984	no	0.053613	184474
XLOC_000206	XLOC_000206	Bcs1l	chr1:74409249-74593723	chr1	74409249	74593723	d8 Nkx2-5 EmGFP	CLK	OK	10.2892	12.6438	0.297295	0.0702387	0.9529	0.987009	no	2.3546	184474
XLOC_000207	XLOC_000207	Stk36	chr1:74593751-74636982	chr1	74593751	74636982	d8 Nkx2-5 EmGFP	CLK	OK	0.109954	1.34439	3.61197	0.661981	0.46405	0.803838	no	1.23444	43231
XLOC_000208	XLOC_000208	Ttll4	chr1:74661639-74703880	chr1	74661639	74703880	d8 Nkx2-5 EmGFP	CLK	OK	14.6307	25.5145	0.802318	0.631188	0.53495	0.844492	no	10.8838	42241
XLOC_000209	XLOC_000209	Cyp27a1	chr1:74713573-74737890	chr1	74713573	74737890	d8 Nkx2-5 EmGFP	CLK	OK	0.310937	0.5486	0.819131	0.409322	0.7212	0.92715	no	0.237663	24317
XLOC_000210	XLOC_000210	Wnt6	chr1:74771891-74785319	chr1	74771891	74785319	d8 Nkx2-5 EmGFP	CLK	OK	0.0269115	0.507049	4.23583	2.20407	0.1953	0.598818	no	0.480137	13428
XLOC_000211	XLOC_000211	Wnt10a	chr1:74792018-74804175	chr1	74792018	74804175	d8 Nkx2-5 EmGFP	CLK	OK	1.40509	0.119647	-3.55381	-1.94115	0.16445	0.553182	no	1.28544	12157
XLOC_000212	XLOC_000212	Cdk5r2	chr1:74855028-74857732	chr1	74855028	74857732	d8 Nkx2-5 EmGFP	CLK	OK	0.134348	0.765979	2.51133	1.51097	0.29885	0.695859	no	0.631631	2704
XLOC_000213	XLOC_000213	Fam134a	chr1:75135214-75147909	chr1	75135214	75147909	d8 Nkx2-5 EmGFP	CLK	OK	29.2854	11.8901	-1.30042	-0.796916	0.4606	0.801066	no	17.3953	12695
XLOC_000214	XLOC_000214	Zfand2b	chr1:75168643-75180283	chr1	75168643	75180283	d8 Nkx2-5 EmGFP	CLK	OK	12.0681	8.65566	-0.479482	-0.21527	0.84745	0.962291	no	3.41244	11640
XLOC_000215	XLOC_000215	Ankzf1	chr1:75180863-75210778	chr1	75180863	75210778	d8 Nkx2-5 EmGFP	CLK	OK	3.59491	7.90261	1.13637	0.397158	0.7095	0.922272	no	4.3077	29915
XLOC_000216	XLOC_000216	Stk16	chr1:75210828-75219296	chr1	75210828	75219296	d8 Nkx2-5 EmGFP	CLK	OK	12.8333	8.47859	-0.597992	-0.150264	0.9066	0.976897	no	4.35471	8468
XLOC_000217	XLOC_000217	Dnajb2	chr1:75236422-75245982	chr1	75236422	75245982	d8 Nkx2-5 EmGFP	CLK	OK	15.436	2.92815	-2.39824	-1.48148	0.1685	0.559296	no	12.5078	9560
XLOC_000218	XLOC_000218	Des	chr1:75357954-75367715	chr1	75357954	75367715	d8 Nkx2-5 EmGFP	CLK	OK	0.405134	11.5879	4.83808	2.77939	0.03405	0.255134	no	11.1828	9761
XLOC_000219	XLOC_000219	Speg	chr1:75375296-75432306	chr1	75375296	75432306	d8 Nkx2-5 EmGFP	CLK	OK	4.25622	3.74244	-0.185596	-0.0935634	0.91885	0.979513	no	0.51378	57010
XLOC_000220	XLOC_000220	Gmppa	chr1:75435942-75443177	chr1	75435942	75443177	d8 Nkx2-5 EmGFP	CLK	OK	19.973	19.5024	-0.0343942	-0.0255813	0.9809	0.993451	no	0.4706	7235
XLOC_000221	XLOC_000221	Accn4	chr1:75447782-75474340	chr1	75447782	75474340	d8 Nkx2-5 EmGFP	CLK	OK	0.133006	0.00305547	-5.44396	-1.67129	0.20905	0.616834	no	0.129951	26558
XLOC_000222	XLOC_000222	Tmem198	chr1:75479531-75485693	chr1	75479531	75485693	d8 Nkx2-5 EmGFP	CLK	OK	0.841677	0.242197	-1.79709	-1.02335	0.44595	0.791363	no	0.59948	6162
XLOC_000223	XLOC_000223	Inha	chr1:75485824-75510354	chr1	75485824	75510354	d8 Nkx2-5 EmGFP	CLK	OK	0.592207	0.104255	-2.50599	-0.0651425	0.21955	0.630033	no	0.487952	24530
XLOC_000224	XLOC_000224	Stk11ip	chr1:75521528-75537335	chr1	75521528	75537335	d8 Nkx2-5 EmGFP	CLK	OK	3.20591	8.90525	1.47392	1.05497	0.32675	0.718028	no	5.69934	15807
XLOC_000225	XLOC_000225	Slc4a3	chr1:75546099-75561568	chr1	75546099	75561568	d8 Nkx2-5 EmGFP	CLK	OK	1.85814	2.17308	0.225882	0.135694	0.89505	0.973936	no	0.31494	15469
XLOC_000226	XLOC_000226	Gm17751	chr1:76489132-76502028	chr1	76489132	76502028	d8 Nkx2-5 EmGFP	CLK	NOTEST	0	0	0	0	1	1	no	0	12896
XLOC_000227	XLOC_000227	Sgpp2	chr1:78310345-78489088	chr1	78310345	78489088	d8 Nkx2-5 EmGFP	CLK	OK	0.0562171	0.226682	2.01159	0.0908977	0.1426	0.511069	no	0.170465	178743
XLOC_000228	XLOC_000228	Mogat1	chr1:78511059-78538173	chr1	78511059	78538173	d8 Nkx2-5 EmGFP	CLK	OK	0	0.219466	inf	#NAME?	0.02145	0.231543	no	0.219466	27114
XLOC_000229	XLOC_000229	Acsl3,Utp14b	chr1:78657824-78707743	chr1	78657824	78707743	d8 Nkx2-5 EmGFP	CLK	OK	23.8518	16.2767	-0.551289	-0.476478	0.66255	0.90269	no	7.5751	49919
XLOC_000230	XLOC_000230	Kcne4	chr1:78816948-78820025	chr1	78816948	78820025	d8 Nkx2-5 EmGFP	CLK	NOTEST	0.00332524	0	#NAME?	0	1	1	no	0.00332524	3077
XLOC_000231	XLOC_000231	Mrpl44	chr1:79776017-79781445	chr1	79776017	79781445	d8 Nkx2-5 EmGFP	CLK	OK	17.4995	35.3523	1.01449	0.878966	0.4665	0.805505	no	17.8528	5428
XLOC_000232	XLOC_000232	1700016L21Rik	chr1:80445931-80475660	chr1	80445931	80475660	d8 Nkx2-5 EmGFP	CLK	NOTEST	0	0	0	0	1	1	no	0	29729
XLOC_000233	XLOC_000233	9430031J16Rik	chr1:81077316-81271651	chr1	81077316	81271651	d8 Nkx2-5 EmGFP	CLK	NOTEST	0	0	0	0	1	1	no	0	194335
XLOC_000234	XLOC_000234	Rhbdd1	chr1:82316578-82445367	chr1	82316578	82445367	d8 Nkx2-5 EmGFP	CLK	OK	7.00156	3.39311	-1.04507	-0.699241	0.5032	0.82855	no	3.60845	128789
XLOC_000235	XLOC_000235	Col4a3	chr1:82586920-82722059	chr1	82586920	82722059	d8 Nkx2-5 EmGFP	CLK	NOTEST	0.00612849	0.00413212	-0.568649	0	1	1	no	0.00199637	135139
XLOC_000236	XLOC_000236	Mff	chr1:82724561-82752389	chr1	82724561	82752389	d8 Nkx2-5 EmGFP	CLK	OK	36.5718	24.4923	-0.578399	-0.442477	0.6649	0.903698	no	12.0795	27828
XLOC_000237	XLOC_000237	Agfg1	chr1:82839028-82901127	chr1	82839028	82901127	d8 Nkx2-5 EmGFP	CLK	OK	32.437	37.121	0.194594	0.154312	0.87435	0.969707	no	4.684	62099
XLOC_000238	XLOC_000238	Ccl20	chr1:83116765-83119167	chr1	83116765	83119167	d8 Nkx2-5 EmGFP	CLK	OK	0	0.73147	inf	#NAME?	0.0083	0.152132	no	0.73147	2402
XLOC_000239	XLOC_000239	Wdr69	chr1:83159761-83210572	chr1	83159761	83210572	d8 Nkx2-5 EmGFP	CLK	NOTEST	0	0	0	0	1	1	no	0	50811
XLOC_000240	XLOC_000240	Mir5126	chr1:84369838-84696221	chr1	84369838	84696221	d8 Nkx2-5 EmGFP	CLK	NOTEST	0	0	0	0	1	1	no	0	326383
XLOC_000241	XLOC_000241	Fbxo36	chr1:84721188-84900486	chr1	84721188	84900486	d8 Nkx2-5 EmGFP	CLK	OK	0.479836	2.29297	2.25661	0.0747404	0.10505	0.432681	no	1.81313	179298
XLOC_000242	XLOC_000242	Gm7609	chr1:85111359-85275177	chr1	85111359	85275177	d8 Nkx2-5 EmGFP	CLK	OK	0.482922	0.259069	-0.898458	-0.335772	0.74265	0.933942	no	0.223853	163818
XLOC_000243	XLOC_000243	Gm7609	chr1:85111359-85275177	chr1	85111359	85275177	d8 Nkx2-5 EmGFP	CLK	OK	0.261495	0.0672089	-1.96006	-0.657239	0.66695	0.90474	no	0.194286	163818
XLOC_000244	XLOC_000244	Sp140	chr1:85576898-85645036	chr1	85576898	85645036	d8 Nkx2-5 EmGFP	CLK	OK	0.334387	0.876201	1.38974	0.508723	0.643	0.895158	no	0.541814	68138
XLOC_000245	XLOC_000245	Sp100	chr1:85650005-85709448	chr1	85650005	85709448	d8 Nkx2-5 EmGFP	CLK	OK	2.78855	0.00896281	-8.28135	-3.52262	0.12815	0.482287	no	2.77959	59443
XLOC_000246	XLOC_000246	Cab39	chr1:85793446-85851577	chr1	85793446	85851577	d8 Nkx2-5 EmGFP	CLK	OK	39.4985	18.7237	-1.07693	-1.06759	0.3884	0.757352	no	20.7748	58131
XLOC_000247	XLOC_000247	Itm2c	chr1:85894509-85908733	chr1	85894509	85908733	d8 Nkx2-5 EmGFP	CLK	OK	56.1214	24.8169	-1.17723	-0.94593	0.36205	0.742631	no	31.3045	14224
XLOC_000248	XLOC_000248	4933407L21Rik	chr1:85928482-85931756	chr1	85928482	85931756	d8 Nkx2-5 EmGFP	CLK	NOTEST	0.00812514	0	#NAME?	0	1	1	no	0.00812514	3274
XLOC_000249	XLOC_000249	Spata3	chr1:86021941-86029958	chr1	86021941	86029958	d8 Nkx2-5 EmGFP	CLK	NOTEST	0	0.0282775	inf	0	1	1	no	0.0282775	8017
XLOC_000250	XLOC_000250	2810459M11Rik	chr1:86045862-86056176	chr1	86045862	86056176	d8 Nkx2-5 EmGFP	CLK	OK	0	0.613783	inf	#NAME?	0.001	0.0444198	yes	0.613783	10314
XLOC_000251	XLOC_000251	Psmd1	chr1:86064618-86139295	chr1	86064618	86139295	d8 Nkx2-5 EmGFP	CLK	OK	125.448	155.526	0.310066	0.283475	0.7826	0.945601	no	30.078	74677
XLOC_000252	XLOC_000252	Armc9	chr1:86154779-86278284	chr1	86154779	86278284	d8 Nkx2-5 EmGFP	CLK	OK	2.79351	9.96436	1.8347	1.08168	0.28585	0.685409	no	7.17085	123505
XLOC_000253	XLOC_000253	B3gnt7	chr1:86303220-86307305	chr1	86303220	86307305	d8 Nkx2-5 EmGFP	CLK	OK	0.0139447	113.119	12.9858	7.71325	0.1667	0.556428	no	113.105	4085
XLOC_000254	XLOC_000254	C130036L24Rik	chr1:86359573-86367964	chr1	86359573	86367964	d8 Nkx2-5 EmGFP	CLK	OK	0.388212	0.395044	0.0251681	0.0137037	0.98685	0.995486	no	0.006832	8391
XLOC_000255	XLOC_000255	1700019O17Rik	chr1:86426328-86428049	chr1	86426328	86428049	d8 Nkx2-5 EmGFP	CLK	NOTEST	0	0.00344903	inf	0	1	1	no	0.00344903	1721
XLOC_000256	XLOC_000256	Ptma	chr1:86526735-86530698	chr1	86526735	86530698	d8 Nkx2-5 EmGFP	CLK	OK	1604.29	1773.59	0.14473	0.135991	0.9066	0.976897	no	169.3	3963
XLOC_000257	XLOC_000257	Cops7b	chr1:86543014-86606500	chr1	86543014	86606500	d8 Nkx2-5 EmGFP	CLK	OK	14.5275	19.0602	0.391775	0.255159	0.80595	0.951763	no	4.5327	63486
XLOC_000258	XLOC_000258	Dis3l2	chr1:86703803-87050097	chr1	86703803	87050097	d8 Nkx2-5 EmGFP	CLK	OK	4.22665	8.11784	0.941582	0.650606	0.52505	0.838876	no	3.89119	346294
XLOC_000259	XLOC_000259	Akp3	chr1:87125007-87127912	chr1	87125007	87127912	d8 Nkx2-5 EmGFP	CLK	NOTEST	0	0.0159271	inf	0	1	1	no	0.0159271	2905
XLOC_000260	XLOC_000260	Prss56	chr1:87183492-87188404	chr1	87183492	87188404	d8 Nkx2-5 EmGFP	CLK	OK	0.241541	0.129496	-0.899361	-0.466057	0.7158	0.924816	no	0.112045	4912
XLOC_000261	XLOC_000261	Chrnd	chr1:87190651-87200070	chr1	87190651	87200070	d8 Nkx2-5 EmGFP	CLK	NOTEST	0.0195742	0.0444786	1.18416	0	1	1	no	0.0249044	9419
XLOC_000262	XLOC_000262	Chrng	chr1:87205810-87211835	chr1	87205810	87211835	d8 Nkx2-5 EmGFP	CLK	NOTEST	0	0.0296711	inf	0	1	1	no	0.0296711	6025
XLOC_000263	XLOC_000263	Eif4e2	chr1:87213913-87240488	chr1	87213913	87240488	d8 Nkx2-5 EmGFP	CLK	OK	53.4032	99.4238	0.896664	0.743567	0.4716	0.809149	no	46.0206	26575
XLOC_000264	XLOC_000264	Efhd1	chr1:87264309-87310835	chr1	87264309	87310835	d8 Nkx2-5 EmGFP	CLK	OK	0.443112	1.66002	1.90546	0.954574	0.3958	0.761762	no	1.21691	46526
XLOC_000265	XLOC_000265	Gigyf2	chr1:87326997-87450810	chr1	87326997	87450810	d8 Nkx2-5 EmGFP	CLK	OK	17.883	23.381	0.386751	0.306568	0.74245	0.933913	no	5.498	123813
XLOC_000266	XLOC_000266	3110079O15Rik	chr1:87469212-87475683	chr1	87469212	87475683	d8 Nkx2-5 EmGFP	CLK	OK	0.428405	0.241301	-0.82814	-0.362184	0.7442	0.934675	no	0.187104	6471
XLOC_000267	XLOC_000267	Neu2	chr1:87574026-87597840	chr1	87574026	87597840	d8 Nkx2-5 EmGFP	CLK	NOTEST	0.0545107	0	#NAME?	0	1	1	no	0.0545107	23814
XLOC_000268	XLOC_000268	-	chr1:87607615-87609922	chr1	87607615	87609922	d8 Nkx2-5 EmGFP	CLK	OK	0.622971	0	#NAME?	#NAME?	0.00165	0.0590233	no	0.622971	2307
XLOC_000269	XLOC_000269	Inpp5d	chr1:87620311-87720508	chr1	87620311	87720508	d8 Nkx2-5 EmGFP	CLK	OK	23.4439	13.0697	-0.842982	-0.689488	0.48915	0.819775	no	10.3742	100197
XLOC_000270	XLOC_000270	Atg16l1	chr1:87756010-87792428	chr1	87756010	87792428	d8 Nkx2-5 EmGFP	CLK	OK	9.0653	11.3053	0.318574	0.224425	0.81735	0.955077	no	2.24	36418
XLOC_000271	XLOC_000271	Scarna6	chr1:87756010-87792428	chr1	87756010	87792428	d8 Nkx2-5 EmGFP	CLK	OK	0.280326	1.20067	2.09866	0.0438734	0.0407	0.255134	no	0.920344	36418
XLOC_000272	XLOC_000272	Sag	chr1:87803679-87845157	chr1	87803679	87845157	d8 Nkx2-5 EmGFP	CLK	OK	0.936679	0.00800489	-6.87053	-1.39789	0.24645	0.656258	no	0.928674	41478
XLOC_000273	XLOC_000273	Dgkd	chr1:87853286-88008551	chr1	87853286	88008551	d8 Nkx2-5 EmGFP	CLK	OK	15.6744	18.8389	0.2653	0.188475	0.8431	0.961294	no	3.1645	155265
XLOC_000274	XLOC_000274	Ugt1a1,Ugt1a10,Ugt1a2,Ugt1a5,Ugt1a6a,Ugt1a6b,Ugt1a7c,Ugt1a9	chr1:88055410-88220002	chr1	88055410	88220002	d8 Nkx2-5 EmGFP	CLK	OK	7.13863	0.00934816	-9.57675	-1.0714	0.129	0.483774	no	7.12928	164592
XLOC_000275	XLOC_000275	Heatr7b1	chr1:88227019-88277659	chr1	88227019	88277659	d8 Nkx2-5 EmGFP	CLK	NOTEST	0.0122965	0	#NAME?	0	1	1	no	0.0122965	50640
XLOC_000276	XLOC_000276	Trpm8	chr1:88306711-88388851	chr1	88306711	88388851	d8 Nkx2-5 EmGFP	CLK	NOTEST	0	0	0	0	1	1	no	0	82140
XLOC_000277	XLOC_000277	Spp2	chr1:88407018-88426438	chr1	88407018	88426438	d8 Nkx2-5 EmGFP	CLK	NOTEST	0	0	0	0	1	1	no	0	19420
XLOC_000278	XLOC_000278	Gm19589	chr1:88551516-88562166	chr1	88551516	88562166	d8 Nkx2-5 EmGFP	CLK	NOTEST	0.0259564	0.0237474	-0.128324	0	1	1	no	0.002209	10650
XLOC_000279	XLOC_000279	2410088K16Rik	chr1:88754889-88755733	chr1	88754889	88755733	d8 Nkx2-5 EmGFP	CLK	OK	0.0276507	5.25776	7.57099	2.94749	0.22885	0.638528	no	5.23011	844
XLOC_000280	XLOC_000280	1700067G17Rik	chr1:89016112-89022210	chr1	89016112	89022210	d8 Nkx2-5 EmGFP	CLK	NOTEST	0	0	0	0	1	1	no	0	6098
XLOC_000281	XLOC_000281	Sh3bp4	chr1:89070403-89155216	chr1	89070403	89155216	d8 Nkx2-5 EmGFP	CLK	OK	16.5452	16.7141	0.0146567	0.0117931	0.9909	0.996802	no	0.1689	84813
XLOC_000282	XLOC_000282	Agap1	chr1:89454810-89908750	chr1	89454810	89908750	d8 Nkx2-5 EmGFP	CLK	OK	3.60007	5.05288	0.489082	0.354865	0.7195	0.926447	no	1.45281	453940
XLOC_000283	XLOC_000283	Cxcr7	chr1:90204002-90216288	chr1	90204002	90216288	d8 Nkx2-5 EmGFP	CLK	OK	0.295063	1.17428	1.99269	0.990065	0.37545	0.749306	no	0.879217	12286
XLOC_000284	XLOC_000284	-	chr1:90519273-90528751	chr1	90519273	90528751	d8 Nkx2-5 EmGFP	CLK	OK	0.725384	0.0705257	-3.36252	-1.58797	0.2068	0.61393	no	0.654858	9478
XLOC_000285	XLOC_000285	Cops8	chr1:90603424-90613341	chr1	90603424	90613341	d8 Nkx2-5 EmGFP	CLK	OK	47.279	47.3342	0.00168558	0.00154013	0.9986	0.999127	no	0.0552	9917
XLOC_000286	XLOC_000286	Mlph	chr1:90915099-90951142	chr1	90915099	90951142	d8 Nkx2-5 EmGFP	CLK	OK	0.165554	0.0710243	-1.22092	-0.552302	0.607	0.879902	no	0.0945297	36043
XLOC_000287	XLOC_000287	Prlh	chr1:90953107-90954012	chr1	90953107	90954012	d8 Nkx2-5 EmGFP	CLK	NOTEST	0	0	0	0	1	1	no	0	905
XLOC_000288	XLOC_000288	Lrrfip1	chr1:90998726-91128944	chr1	90998726	91128944	d8 Nkx2-5 EmGFP	CLK	OK	125.149	5.65411	-4.4682	-3.34236	0.0045	0.11051	no	119.495	130218
XLOC_000289	XLOC_000289	Rbm44	chr1:91145102-91170795	chr1	91145102	91170795	d8 Nkx2-5 EmGFP	CLK	OK	0.00221525	0.323424	7.18981	2.63242	0.22725	0.636907	no	0.321209	25693
XLOC_000290	XLOC_000290	Ramp1	chr1:91179821-91225196	chr1	91179821	91225196	d8 Nkx2-5 EmGFP	CLK	NOTEST	0.00665368	0.0294443	2.14576	0	1	1	no	0.0227906	45375
XLOC_000291	XLOC_000291	Ube2f	chr1:91250269-91290336	chr1	91250269	91290336	d8 Nkx2-5 EmGFP	CLK	OK	39.7283	25.5062	-0.63932	-0.462947	0.64725	0.89712	no	14.2221	40067
XLOC_000292	XLOC_000292	Scly	chr1:91298337-91321080	chr1	91298337	91321080	d8 Nkx2-5 EmGFP	CLK	OK	5.06234	14.1916	1.48716	0.998019	0.3381	0.725874	no	9.12926	22743
XLOC_000293	XLOC_000293	Espnl	chr1:91322074-91348312	chr1	91322074	91348312	d8 Nkx2-5 EmGFP	CLK	OK	0.346936	0.220302	-0.655188	-0.324614	0.7643	0.941447	no	0.126634	26238
XLOC_000294	XLOC_000294	Klhl30	chr1:91351072-91362404	chr1	91351072	91362404	d8 Nkx2-5 EmGFP	CLK	OK	0.467279	0.0873125	-2.42002	-1.23154	0.3256	0.717321	no	0.379966	11332
XLOC_000295	XLOC_000295	Fam132b	chr1:91366429-91398790	chr1	91366429	91398790	d8 Nkx2-5 EmGFP	CLK	OK	1.49626	2.0566	0.458893	0.1253	0.9176	0.979418	no	0.56034	32361
XLOC_000296	XLOC_000296	Traf3ip1	chr1:91494667-91529307	chr1	91494667	91529307	d8 Nkx2-5 EmGFP	CLK	OK	5.78133	4.19816	-0.461645	-0.288829	0.76025	0.940051	no	1.58317	34640
XLOC_000297	XLOC_000297	Asb1	chr1:91540378-91559763	chr1	91540378	91559763	d8 Nkx2-5 EmGFP	CLK	OK	3.40462	2.18251	-0.641507	-0.425149	0.6831	0.910195	no	1.22211	19385
XLOC_000298	XLOC_000298	Twist2	chr1:91801476-91848027	chr1	91801476	91848027	d8 Nkx2-5 EmGFP	CLK	OK	47.6104	0.968434	-5.61948	-4.0779	0.019	0.219978	no	46.642	46551
XLOC_000299	XLOC_000299	Olfr1413	chr1:92573124-92574206	chr1	92573124	92574206	d8 Nkx2-5 EmGFP	CLK	NOTEST	0	0	0	0	1	1	no	0	1082
XLOC_000300	XLOC_000300	Olfr1412	chr1:92588331-92589297	chr1	92588331	92589297	d8 Nkx2-5 EmGFP	CLK	NOTEST	0	0	0	0	1	1	no	0	966
XLOC_000301	XLOC_000301	Olfr1411	chr1:92596520-92597492	chr1	92596520	92597492	d8 Nkx2-5 EmGFP	CLK	NOTEST	0	0	0	0	1	1	no	0	972
XLOC_000302	XLOC_000302	Olfr1410	chr1:92607838-92608807	chr1	92607838	92608807	d8 Nkx2-5 EmGFP	CLK	NOTEST	0	0	0	0	1	1	no	0	969
XLOC_000303	XLOC_000303	Olfr12	chr1:92619880-92621001	chr1	92619880	92621001	d8 Nkx2-5 EmGFP	CLK	NOTEST	0.0103097	0	#NAME?	0	1	1	no	0.0103097	1121
XLOC_000304	XLOC_000304	Gpc1	chr1:92831685-92860196	chr1	92831685	92860196	d8 Nkx2-5 EmGFP	CLK	OK	135.182	20.9686	-2.6886	-2.2829	0.03555	0.255134	no	114.213	28511
XLOC_000305	XLOC_000305	Mir149	chr1:92831685-92860196	chr1	92831685	92860196	d8 Nkx2-5 EmGFP	CLK	NOTEST	0	0	0	0	1	1	no	0	28511
XLOC_000306	XLOC_000306	Dusp28	chr1:92906988-92908620	chr1	92906988	92908620	d8 Nkx2-5 EmGFP	CLK	OK	1.30937	1.84766	0.496831	0.317365	0.82	0.955438	no	0.53829	1632
XLOC_000307	XLOC_000307	Rnpepl1	chr1:92910824-92925759	chr1	92910824	92925759	d8 Nkx2-5 EmGFP	CLK	OK	20.5401	18.0898	-0.183264	-0.142381	0.8883	0.972422	no	2.4503	14935
XLOC_000308	XLOC_000308	Capn10	chr1:92933542-92950590	chr1	92933542	92950590	d8 Nkx2-5 EmGFP	CLK	OK	6.19499	9.61919	0.634815	0.416392	0.67955	0.909027	no	3.4242	17048
XLOC_000309	XLOC_000309	Gpr35	chr1:92973118-92986391	chr1	92973118	92986391	d8 Nkx2-5 EmGFP	CLK	OK	2.09157	0.072661	-4.84726	-2.55443	0.05275	0.284276	no	2.01891	13273
XLOC_000310	XLOC_000310	Aqp12	chr1:93006333-93012269	chr1	93006333	93012269	d8 Nkx2-5 EmGFP	CLK	NOTEST	0	0	0	0	1	1	no	0	5936
XLOC_000311	XLOC_000311	Agxt	chr1:93135275-93145421	chr1	93135275	93145421	d8 Nkx2-5 EmGFP	CLK	NOTEST	0	0.00872448	inf	0	1	1	no	0.00872448	10146
XLOC_000312	XLOC_000312	-	chr1:93189336-93191085	chr1	93189336	93191085	d8 Nkx2-5 EmGFP	CLK	OK	0.00534658	0.275136	5.68539	2.11055	0.24985	0.656973	no	0.269789	1749
XLOC_000313	XLOC_000313	-	chr1:93193042-93201606	chr1	93193042	93201606	d8 Nkx2-5 EmGFP	CLK	OK	0.0463435	0.220491	2.25028	0.819815	0.43425	0.784982	no	0.174147	8564
XLOC_000314	XLOC_000314	-	chr1:93206838-93231033	chr1	93206838	93231033	d8 Nkx2-5 EmGFP	CLK	OK	0.0338621	1.07778	4.99225	2.33697	0.05985	0.301753	no	1.04392	24195
XLOC_000315	XLOC_000315	Sned1	chr1:93235837-93306188	chr1	93235837	93306188	d8 Nkx2-5 EmGFP	CLK	OK	1.96837	1.64708	-0.257097	-0.100209	0.9222	0.980376	no	0.32129	70351
XLOC_000316	XLOC_000316	Ppp1r7	chr1:93308430-93373454	chr1	93308430	93373454	d8 Nkx2-5 EmGFP	CLK	OK	15.0166	30.6123	1.02755	0.708105	0.50235	0.828253	no	15.5957	65024
XLOC_000317	XLOC_000317	Ano7	chr1:93373895-93404306	chr1	93373895	93404306	d8 Nkx2-5 EmGFP	CLK	OK	0.00695485	0.174153	4.64619	1.94287	0.166	0.555437	no	0.167198	30411
XLOC_000318	XLOC_000318	2013-09-02	chr1:93478992-93509732	chr1	93478992	93509732	d8 Nkx2-5 EmGFP	CLK	OK	108.934	28.0426	-1.95777	-1.6351	0.1129	0.451876	no	80.8914	30740
XLOC_000319	XLOC_000319	Farp2	chr1:93512102-93635727	chr1	93512102	93635727	d8 Nkx2-5 EmGFP	CLK	OK	9.26144	0.645565	-3.8426	-1.564	0.21255	0.621416	no	8.61588	123625
XLOC_000320	XLOC_000320	Bok	chr1:93685693-93695762	chr1	93685693	93695762	d8 Nkx2-5 EmGFP	CLK	OK	36.55	18.8934	-0.951988	-0.813407	0.49145	0.821129	no	17.6566	10069
XLOC_000321	XLOC_000321	Atg4b	chr1:93705390-93790362	chr1	93705390	93790362	d8 Nkx2-5 EmGFP	CLK	OK	17.6887	17.6455	-0.00353543	-0.00211721	0.99825	0.99909	no	0.0432	84972
XLOC_000322	XLOC_000322	Ing5	chr1:93802164-93822100	chr1	93802164	93822100	d8 Nkx2-5 EmGFP	CLK	OK	8.98525	8.87157	-0.0183694	-0.0140219	0.9885	0.995991	no	0.11368	19936
XLOC_000323	XLOC_000323	D2hgdh,Gm9994	chr1:93825239-93988736	chr1	93825239	93988736	d8 Nkx2-5 EmGFP	CLK	OK	3.73099	7.0417	0.916364	0.612486	0.56085	0.858196	no	3.31071	163497
XLOC_000324	XLOC_000324	Gal3st2	chr1:93825239-93988736	chr1	93825239	93988736	d8 Nkx2-5 EmGFP	CLK	NOTEST	0.0176382	0.00945903	-0.898936	0	1	1	no	0.00817917	163497
XLOC_000325	XLOC_000325	Gm6086	chr1:93990508-94011539	chr1	93990508	94011539	d8 Nkx2-5 EmGFP	CLK	OK	0.124728	0.248285	0.993211	0.439757	0.69935	0.918204	no	0.123557	21031
XLOC_000326	XLOC_000326	Neu4	chr1:94020492-94028330	chr1	94020492	94028330	d8 Nkx2-5 EmGFP	CLK	NOTEST	0	0	0	0	1	1	no	0	7838
XLOC_000327	XLOC_000327	4930440C22Rik	chr1:94797441-94802472	chr1	94797441	94802472	d8 Nkx2-5 EmGFP	CLK	NOTEST	0	0	0	0	1	1	no	0	5031
XLOC_000328	XLOC_000328	Fam174a	chr1:95313627-95335284	chr1	95313627	95335284	d8 Nkx2-5 EmGFP	CLK	OK	2.59957	1.83586	-0.50182	-0.37118	0.8075	0.952107	no	0.76371	21657
XLOC_000329	XLOC_000329	Gin1	chr1:97706045-97793082	chr1	97706045	97793082	d8 Nkx2-5 EmGFP	CLK	OK	3.13278	1.68854	-0.89167	-0.169389	0.8421	0.961077	no	1.44424	87037
XLOC_000330	XLOC_000330	1810006J02Rik	chr1:98131466-98144655	chr1	98131466	98144655	d8 Nkx2-5 EmGFP	CLK	NOTEST	0	0	0	0	1	1	no	0	13189
XLOC_000331	XLOC_000331	Slco6d1	chr1:98421123-98509380	chr1	98421123	98509380	d8 Nkx2-5 EmGFP	CLK	NOTEST	0	0	0	0	1	1	no	0	88257
XLOC_000332	XLOC_000332	-	chr1:98605719-98607363	chr1	98605719	98607363	d8 Nkx2-5 EmGFP	CLK	OK	0.351326	0	#NAME?	#NAME?	0.0248	0.239279	no	0.351326	1644
XLOC_000333	XLOC_000333	Cntnap5b	chr1:99772764-100485942	chr1	99772764	100485942	d8 Nkx2-5 EmGFP	CLK	NOTEST	0	0	0	0	1	1	no	0	713178
XLOC_000334	XLOC_000334	Gm20268	chr1:101155767-101175202	chr1	101155767	101175202	d8 Nkx2-5 EmGFP	CLK	NOTEST	0	0	0	0	1	1	no	0	19435
XLOC_000335	XLOC_000335	Cdh20	chr1:104768818-104995481	chr1	104768818	104995481	d8 Nkx2-5 EmGFP	CLK	NOTEST	0.00208416	0.0220223	3.40143	0	1	1	no	0.0199381	226663
XLOC_000336	XLOC_000336	2310035C23Rik	chr1:105663860-105755164	chr1	105663860	105755164	d8 Nkx2-5 EmGFP	CLK	OK	6.98614	3.86532	-0.853908	-0.609066	0.5551	0.855464	no	3.12082	91304
XLOC_000337	XLOC_000337	Tnfrsf11a	chr1:105780722-105851793	chr1	105780722	105851793	d8 Nkx2-5 EmGFP	CLK	OK	10.4584	0.560564	-4.22163	-2.07071	0.0626	0.310913	no	9.89784	71071
XLOC_000338	XLOC_000338	-	chr1:105862986-105878235	chr1	105862986	105878235	d8 Nkx2-5 EmGFP	CLK	OK	1.36481	0	#NAME?	#NAME?	0.00135	0.0528094	no	1.36481	15249
XLOC_000339	XLOC_000339	Zcchc2	chr1:105977553-106034079	chr1	105977553	106034079	d8 Nkx2-5 EmGFP	CLK	OK	16.8005	6.30042	-1.41498	-1.10825	0.28265	0.68216	no	10.5001	56526
XLOC_000340	XLOC_000340	Phlpp1	chr1:106171743-106394245	chr1	106171743	106394245	d8 Nkx2-5 EmGFP	CLK	OK	24.7974	8.415	-1.55916	-0.438975	0.2833	0.682887	no	16.3824	222502
XLOC_000341	XLOC_000341	Serpinb5	chr1:106861179-106883348	chr1	106861179	106883348	d8 Nkx2-5 EmGFP	CLK	NOTEST	0.0431003	0.0365362	-0.23837	0	1	1	no	0.0065641	22169
XLOC_000342	XLOC_000342	Serpinb12	chr1:106934448-106957080	chr1	106934448	106957080	d8 Nkx2-5 EmGFP	CLK	NOTEST	0.00531278	0	#NAME?	0	1	1	no	0.00531278	22632
XLOC_000343	XLOC_000343	Serpinb13	chr1:106980983-107001195	chr1	106980983	107001195	d8 Nkx2-5 EmGFP	CLK	NOTEST	0	0	0	0	1	1	no	0	20212
XLOC_000344	XLOC_000344	Serpinb11	chr1:107362313-107380475	chr1	107362313	107380475	d8 Nkx2-5 EmGFP	CLK	NOTEST	0	0	0	0	1	1	no	0	18162
XLOC_000345	XLOC_000345	Serpinb7	chr1:107422688-107452689	chr1	107422688	107452689	d8 Nkx2-5 EmGFP	CLK	NOTEST	0	0	0	0	1	1	no	0	30001
XLOC_000346	XLOC_000346	Serpinb2	chr1:107511422-107525600	chr1	107511422	107525600	d8 Nkx2-5 EmGFP	CLK	OK	15.4007	0	#NAME?	#NAME?	5e-05	0.00396813	yes	15.4007	14178
XLOC_000347	XLOC_000347	Serpinb10-ps	chr1:107529002-107558974	chr1	107529002	107558974	d8 Nkx2-5 EmGFP	CLK	OK	0.663223	0.00869955	-6.25241	-2.02476	0.1956	0.599313	no	0.654523	29972
XLOC_000348	XLOC_000348	Serpinb8	chr1:107590005-107608978	chr1	107590005	107608978	d8 Nkx2-5 EmGFP	CLK	OK	1.95713	0.217908	-3.16695	-1.51507	0.171	0.563124	no	1.73922	18973
XLOC_000349	XLOC_000349	Cdh7	chr1:109983736-110139001	chr1	109983736	110139001	d8 Nkx2-5 EmGFP	CLK	NOTEST	0	0.00632197	inf	0	1	1	no	0.00632197	155265
XLOC_000350	XLOC_000350	Cntnap5a	chr1:115684791-116583335	chr1	115684791	116583335	d8 Nkx2-5 EmGFP	CLK	NOTEST	0.0300897	0	#NAME?	0	1	1	no	0.0300897	898544
XLOC_000351	XLOC_000351	Mki67ip	chr1:118321842-118333831	chr1	118321842	118333831	d8 Nkx2-5 EmGFP	CLK	OK	55.878	83.8259	0.585115	0.550771	0.62455	0.88747	no	27.9479	11989
XLOC_000352	XLOC_000352	Clasp1	chr1:118388002-118612844	chr1	118388002	118612844	d8 Nkx2-5 EmGFP	CLK	OK	18.8732	18.4812	-0.0302807	-0.0250582	0.97935	0.992918	no	0.392	224842
XLOC_000353	XLOC_000353	Tfcp2l1	chr1:118627944-118685168	chr1	118627944	118685168	d8 Nkx2-5 EmGFP	CLK	OK	0.111849	43.5059	8.60351	5.9403	0.00825	0.15172	no	43.3941	57224
XLOC_000354	XLOC_000354	-	chr1:119305593-119320591	chr1	119305593	119320591	d8 Nkx2-5 EmGFP	CLK	OK	0	0.375716	inf	#NAME?	0.00875	0.154774	no	0.375716	14998
XLOC_000355	XLOC_000355	Tmem185b	chr1:119526153-119528983	chr1	119526153	119528983	d8 Nkx2-5 EmGFP	CLK	OK	11.0756	7.44923	-0.572222	-0.523156	0.69985	0.918366	no	3.62637	2830
XLOC_000356	XLOC_000356	Sctr	chr1:120006979-120063532	chr1	120006979	120063532	d8 Nkx2-5 EmGFP	CLK	NOTEST	0	0	0	0	1	1	no	0	56553
XLOC_000357	XLOC_000357	3110009E18Rik	chr1:120121185-120188189	chr1	120121185	120188189	d8 Nkx2-5 EmGFP	CLK	OK	2.89762	14.1932	2.29226	1.15919	0.30695	0.703162	no	11.2956	67004
XLOC_000358	XLOC_000358	C1ql2	chr1:120340581-120343174	chr1	120340581	120343174	d8 Nkx2-5 EmGFP	CLK	OK	0	0.0865586	inf	#NAME?	0.0263	0.24092	no	0.0865586	2593
XLOC_000359	XLOC_000359	En1	chr1:120602486-120607991	chr1	120602486	120607991	d8 Nkx2-5 EmGFP	CLK	OK	0	1.81528	inf	#NAME?	0.0004	0.0231645	yes	1.81528	5505
XLOC_000360	XLOC_000360	B230209K01Rik	chr1:121087404-121120975	chr1	121087404	121120975	d8 Nkx2-5 EmGFP	CLK	NOTEST	0	0	0	0	1	1	no	0	33571
XLOC_000361	XLOC_000361	Ccdc93	chr1:121431032-121507240	chr1	121431032	121507240	d8 Nkx2-5 EmGFP	CLK	OK	7.38979	4.30877	-0.778256	-0.600733	0.56	0.85774	no	3.08102	76208
XLOC_000362	XLOC_000362	Slc35f5	chr1:125560593-125595684	chr1	125560593	125595684	d8 Nkx2-5 EmGFP	CLK	OK	12.4526	8.46306	-0.557191	-0.393269	0.703	0.919758	no	3.98954	35091
XLOC_000363	XLOC_000363	Gpr39	chr1:125676995-125912214	chr1	125676995	125912214	d8 Nkx2-5 EmGFP	CLK	OK	2.83216	0.0642498	-5.46207	-1.24906	0.2864	0.686154	no	2.76791	235219
XLOC_000364	XLOC_000364	Mgat5	chr1:127204697-127488554	chr1	127204697	127488554	d8 Nkx2-5 EmGFP	CLK	OK	20.2605	1.99637	-3.34323	-2.27038	0.03535	0.255134	no	18.2641	283857
XLOC_000365	XLOC_000365	Acmsd	chr1:127729412-127808062	chr1	127729412	127808062	d8 Nkx2-5 EmGFP	CLK	NOTEST	0.00397986	0	#NAME?	0	1	1	no	0.00397986	78650
XLOC_000366	XLOC_000366	Ccnt2	chr1:127729412-127808062	chr1	127729412	127808062	d8 Nkx2-5 EmGFP	CLK	OK	7.89685	15.0346	0.928935	0.688492	0.49735	0.824921	no	7.13775	78650
XLOC_000367	XLOC_000367	Rab3gap1	chr1:127868772-127943876	chr1	127868772	127943876	d8 Nkx2-5 EmGFP	CLK	OK	15.1438	13.809	-0.133115	-0.109293	0.92025	0.979662	no	1.3348	75104
XLOC_000368	XLOC_000368	R3hdm1	chr1:128103298-128237735	chr1	128103298	128237735	d8 Nkx2-5 EmGFP	CLK	OK	15.1237	9.67197	-0.644931	-0.50213	0.62855	0.889181	no	5.45173	134437
XLOC_000369	XLOC_000369	Mir128-1	chr1:128103298-128237735	chr1	128103298	128237735	d8 Nkx2-5 EmGFP	CLK	NOTEST	0	0	0	0	1	1	no	0	134437
XLOC_000370	XLOC_000370	Ubxn4	chr1:128244180-128279377	chr1	128244180	128279377	d8 Nkx2-5 EmGFP	CLK	OK	28.8126	11.2364	-1.35852	-1.11933	0.2959	0.693974	no	17.5762	35197
XLOC_000371	XLOC_000371	Thsd7b	chr1:129273303-130219278	chr1	129273303	130219278	d8 Nkx2-5 EmGFP	CLK	NOTEST	0.00130345	0.00524574	2.00881	0	1	1	no	0.00394229	945975
XLOC_000372	XLOC_000372	Yod1	chr1:130689042-130729253	chr1	130689042	130729253	d8 Nkx2-5 EmGFP	CLK	OK	2.64116	0.327205	-3.01291	-0.922655	0.40825	0.770007	no	2.31395	40211
XLOC_000373	XLOC_000373	AA986860	chr1:130731975-130744622	chr1	130731975	130744622	d8 Nkx2-5 EmGFP	CLK	OK	0.375789	0.907338	1.27172	0.583884	0.5656	0.860212	no	0.531549	12647
XLOC_000374	XLOC_000374	Fcamr	chr1:130800901-130814740	chr1	130800901	130814740	d8 Nkx2-5 EmGFP	CLK	NOTEST	0	0	0	0	1	1	no	0	13839
XLOC_000375	XLOC_000375	Pigr	chr1:130826683-130852249	chr1	130826683	130852249	d8 Nkx2-5 EmGFP	CLK	NOTEST	0.00758367	0.00155287	-2.28796	0	1	1	no	0.0060308	25566
XLOC_000376	XLOC_000376	Faim3	chr1:130865776-130880790	chr1	130865776	130880790	d8 Nkx2-5 EmGFP	CLK	NOTEST	0.0340243	0.0311464	-0.127498	0	1	1	no	0.0028779	15014
XLOC_000377	XLOC_000377	Il10	chr1:131019844-131024970	chr1	131019844	131024970	d8 Nkx2-5 EmGFP	CLK	NOTEST	0	0.0126079	inf	0	1	1	no	0.0126079	5126
XLOC_000378	XLOC_000378	Eif2d	chr1:131153177-131245178	chr1	131153177	131245178	d8 Nkx2-5 EmGFP	CLK	OK	42.4071	111.986	1.40095	1.15298	0.26345	0.666657	no	69.5789	92001
XLOC_000379	XLOC_000379	Fam72a	chr1:131285250-131539872	chr1	131285250	131539872	d8 Nkx2-5 EmGFP	CLK	OK	2.98763	5.09785	0.770889	0.166578	0.8761	0.97015	no	2.11022	254622
XLOC_000380	XLOC_000380	Avpr1b	chr1:131599113-131612000	chr1	131599113	131612000	d8 Nkx2-5 EmGFP	CLK	NOTEST	0	0.00501208	inf	0	1	1	no	0.00501208	12887
XLOC_000381	XLOC_000381	Ctse	chr1:131638313-131675507	chr1	131638313	131675507	d8 Nkx2-5 EmGFP	CLK	NOTEST	0	0.00312474	inf	0	1	1	no	0.00312474	37194
XLOC_000382	XLOC_000382	5430435G22Rik	chr1:131688693-131713658	chr1	131688693	131713658	d8 Nkx2-5 EmGFP	CLK	OK	0.635029	0.101843	-2.64048	-1.25769	0.2666	0.669293	no	0.533186	24965
XLOC_000383	XLOC_000383	Slc26a9	chr1:131744021-131770405	chr1	131744021	131770405	d8 Nkx2-5 EmGFP	CLK	NOTEST	0.00232829	0.0749813	5.00919	0	1	1	no	0.072653	26384
XLOC_000384	XLOC_000384	Pm20d1	chr1:131797394-131818115	chr1	131797394	131818115	d8 Nkx2-5 EmGFP	CLK	OK	0.0309422	2.26199	6.19187	3.27343	0.0767	0.356692	no	2.23105	20721
XLOC_000385	XLOC_000385	Slc41a1	chr1:131828011-131848864	chr1	131828011	131848864	d8 Nkx2-5 EmGFP	CLK	OK	10.3778	5.51097	-0.913128	-0.713277	0.50795	0.830418	no	4.86683	20853
XLOC_000386	XLOC_000386	Rab7l1	chr1:131867276-131872889	chr1	131867276	131872889	d8 Nkx2-5 EmGFP	CLK	OK	4.22811	1.46315	-1.53094	-0.868541	0.48365	0.816061	no	2.76496	5613
XLOC_000387	XLOC_000387	Nucks1	chr1:131910457-131936321	chr1	131910457	131936321	d8 Nkx2-5 EmGFP	CLK	OK	81.163	46.3352	-0.808713	-0.708238	0.491	0.820879	no	34.8278	25864
XLOC_000388	XLOC_000388	Slc45a3	chr1:131962912-131982964	chr1	131962912	131982964	d8 Nkx2-5 EmGFP	CLK	OK	1.34227	0.61923	-1.11613	-0.579032	0.5983	0.875953	no	0.72304	20052
XLOC_000389	XLOC_000389	Elk4	chr1:132007604-132068062	chr1	132007604	132068062	d8 Nkx2-5 EmGFP	CLK	OK	11.0799	0.729545	-3.92481	-2.80106	0.0414	0.255492	no	10.3504	60458
XLOC_000390	XLOC_000390	Lemd1,Mir135b	chr1:132190566-132257382	chr1	132190566	132257382	d8 Nkx2-5 EmGFP	CLK	OK	0.00145522	2.01723	10.4369	2.41358	0.2138	0.622788	no	2.01577	66816
XLOC_000391	XLOC_000391	Lemd1	chr1:132190566-132257382	chr1	132190566	132257382	d8 Nkx2-5 EmGFP	CLK	OK	0.0440054	0.200167	2.18545	0.22738	0.4162	0.774852	no	0.156162	66816
XLOC_000392	XLOC_000392	Mir135b	chr1:132190566-132257382	chr1	132190566	132257382	d8 Nkx2-5 EmGFP	CLK	OK	0	0.544756	inf	#NAME?	0.24825	0.656973	no	0.544756	66816
XLOC_000393	XLOC_000393	Klhdc8a	chr1:132292862-132307357	chr1	132292862	132307357	d8 Nkx2-5 EmGFP	CLK	OK	11.7984	0.191977	-5.94151	-3.48931	0.01395	0.193998	no	11.6064	14495
XLOC_000394	XLOC_000394	Nuak2	chr1:132316124-132333488	chr1	132316124	132333488	d8 Nkx2-5 EmGFP	CLK	OK	7.44491	5.46777	-0.445302	-0.309755	0.7633	0.941065	no	1.97714	17364
XLOC_000395	XLOC_000395	-	chr1:132342014-132351362	chr1	132342014	132351362	d8 Nkx2-5 EmGFP	CLK	OK	4.66652	0.00146482	-11.6374	-1.20574	0.13685	0.499887	no	4.66506	9348
XLOC_000396	XLOC_000396	Dstyk	chr1:132417452-132508639	chr1	132417452	132508639	d8 Nkx2-5 EmGFP	CLK	OK	2.57596	1.1546	-1.15772	-0.375482	0.77015	0.94304	no	1.42136	91187
XLOC_000397	XLOC_000397	Rbbp5,Tmem81	chr1:132417452-132508639	chr1	132417452	132508639	d8 Nkx2-5 EmGFP	CLK	OK	12.7455	17.6009	0.465666	0.359392	0.74925	0.936308	no	4.8554	91187
XLOC_000398	XLOC_000398	Gm10538	chr1:132564689-132742012	chr1	132564689	132742012	d8 Nkx2-5 EmGFP	CLK	NOTEST	0	0.0269065	inf	0	1	1	no	0.0269065	177323
XLOC_000399	XLOC_000399	Lrrn2	chr1:132880354-132940005	chr1	132880354	132940005	d8 Nkx2-5 EmGFP	CLK	OK	0.0096568	1.40356	7.18333	3.33613	0.16875	0.559587	no	1.3939	59651
XLOC_000400	XLOC_000400	Pik3c2b	chr1:133046011-133108688	chr1	133046011	133108688	d8 Nkx2-5 EmGFP	CLK	OK	0.309859	0.637079	1.03986	0.534542	0.6151	0.883794	no	0.32722	62677
XLOC_000401	XLOC_000401	Ppp1r15b	chr1:133131165-133139800	chr1	133131165	133139800	d8 Nkx2-5 EmGFP	CLK	OK	37.6407	34.6853	-0.117967	-0.115349	0.91735	0.979418	no	2.9554	8635
XLOC_000402	XLOC_000402	Plekha6	chr1:133164512-133303435	chr1	133164512	133303435	d8 Nkx2-5 EmGFP	CLK	OK	0.0616378	0.726045	3.55817	1.52198	0.1349	0.495841	no	0.664407	138923
XLOC_000403	XLOC_000403	Golt1a,Kiss1	chr1:133309797-133329722	chr1	133309797	133329722	d8 Nkx2-5 EmGFP	CLK	NOTEST	0	0.00573428	inf	0	1	1	no	0.00573428	19925
XLOC_000404	XLOC_000404	Ren1,Ren2	chr1:133350565-133360323	chr1	133350565	133360323	d8 Nkx2-5 EmGFP	CLK	OK	0	0.142077	inf	#NAME?	0.0182	0.214693	no	0.142077	9758
XLOC_000405	XLOC_000405	Etnk2	chr1:133363571-133380319	chr1	133363571	133380319	d8 Nkx2-5 EmGFP	CLK	OK	0.00763036	5.42976	9.47492	4.81629	0.22045	0.630908	no	5.42213	16748
XLOC_000406	XLOC_000406	Fmod	chr1:134037514-134048277	chr1	134037514	134048277	d8 Nkx2-5 EmGFP	CLK	NOTEST	0	0.00235421	inf	0	1	1	no	0.00235421	10763
XLOC_000407	XLOC_000407	Chit1	chr1:134111241-134151436	chr1	134111241	134151436	d8 Nkx2-5 EmGFP	CLK	OK	0.041686	0.18515	2.15106	0.951256	0.4208	0.777758	no	0.143464	40195
XLOC_000408	XLOC_000408	Chi3l1	chr1:134182403-134190031	chr1	134182403	134190031	d8 Nkx2-5 EmGFP	CLK	OK	0	0.134127	inf	#NAME?	0.0199	0.225701	no	0.134127	7628
XLOC_000409	XLOC_000409	Mybph	chr1:134193418-134235431	chr1	134193418	134235431	d8 Nkx2-5 EmGFP	CLK	NOTEST	0.00809745	0.0255338	1.65687	0	1	1	no	0.0174363	42013
XLOC_000410	XLOC_000410	Myog	chr1:134290003-134292548	chr1	134290003	134292548	d8 Nkx2-5 EmGFP	CLK	NOTEST	0	0.0277631	inf	0	1	1	no	0.0277631	2545
XLOC_000411	XLOC_000411	4933406M09Rik	chr1:134385939-134390983	chr1	134385939	134390983	d8 Nkx2-5 EmGFP	CLK	NOTEST	0	0.0230361	inf	0	1	1	no	0.0230361	5044
XLOC_000412	XLOC_000412	Cyb5r1	chr1:134405989-134411738	chr1	134405989	134411738	d8 Nkx2-5 EmGFP	CLK	OK	52.6362	27.7498	-0.923575	-0.829279	0.48425	0.816505	no	24.8864	5749
XLOC_000413	XLOC_000413	Adipor1	chr1:134415463-134433352	chr1	134415463	134433352	d8 Nkx2-5 EmGFP	CLK	OK	94.5518	80.1952	-0.237588	-0.203017	0.83995	0.96023	no	14.3566	17889
XLOC_000414	XLOC_000414	Klhl12	chr1:134455541-134490945	chr1	134455541	134490945	d8 Nkx2-5 EmGFP	CLK	OK	8.49283	8.97423	0.0795421	0.0588094	0.95845	0.988043	no	0.4814	35404
XLOC_000415	XLOC_000415	Rabif	chr1:134494659-134507884	chr1	134494659	134507884	d8 Nkx2-5 EmGFP	CLK	OK	20.4054	22.3407	0.130724	0.119116	0.92525	0.981485	no	1.9353	13225
XLOC_000416	XLOC_000416	Kdm5b	chr1:134560177-134632878	chr1	134560177	134632878	d8 Nkx2-5 EmGFP	CLK	OK	2.5604	137.565	5.7476	4.45036	0.00125	0.0503262	no	135.005	72701
XLOC_000417	XLOC_000417	Syt2	chr1:134646680-134749417	chr1	134646680	134749417	d8 Nkx2-5 EmGFP	CLK	NOTEST	0.00946956	0.0345552	1.86754	0	1	1	no	0.0250856	102737
XLOC_000418	XLOC_000418	Ube2t	chr1:134962555-134974137	chr1	134962555	134974137	d8 Nkx2-5 EmGFP	CLK	OK	12.3501	14.8721	0.268082	0.169491	0.86825	0.968105	no	2.522	11582
XLOC_000419	XLOC_000419	Ptpn7	chr1:135132628-135145320	chr1	135132628	135145320	d8 Nkx2-5 EmGFP	CLK	OK	10.2141	0.499837	-4.35297	-2.56104	0.0412	0.255134	no	9.71426	12692
XLOC_000420	XLOC_000420	Arl8a	chr1:135146833-135156268	chr1	135146833	135156268	d8 Nkx2-5 EmGFP	CLK	OK	36.8124	17.2865	-1.09055	-0.919095	0.43005	0.78296	no	19.5259	9435
XLOC_000421	XLOC_000421	-	chr1:135232032-135233414	chr1	135232032	135233414	d8 Nkx2-5 EmGFP	CLK	OK	41.2471	10.2924	-2.00272	-1.09528	0.31795	0.712091	no	30.9547	1382
XLOC_000422	XLOC_000422	Lmod1	chr1:135324812-135368065	chr1	135324812	135368065	d8 Nkx2-5 EmGFP	CLK	OK	0.0468651	0.199007	2.08623	0.851711	0.3972	0.762953	no	0.152142	43253
XLOC_000423	XLOC_000423	Csrp1	chr1:135729196-135752229	chr1	135729196	135752229	d8 Nkx2-5 EmGFP	CLK	OK	97.2956	78.512	-0.309461	-0.283048	0.7929	0.948698	no	18.7836	23033
XLOC_000424	XLOC_000424	Phlda3	chr1:135764414-135769134	chr1	135764414	135769134	d8 Nkx2-5 EmGFP	CLK	OK	104.655	54.8792	-0.93131	-0.767647	0.4553	0.798236	no	49.7758	4720
XLOC_000425	XLOC_000425	Tnni1	chr1:135788151-135810989	chr1	135788151	135810989	d8 Nkx2-5 EmGFP	CLK	OK	0.263172	0.169551	-0.634293	-0.296854	0.77935	0.945595	no	0.093621	22838
XLOC_000426	XLOC_000426	Lad1	chr1:135818597-135833341	chr1	135818597	135833341	d8 Nkx2-5 EmGFP	CLK	OK	0.0321192	15.5656	8.92071	4.47206	0.07155	0.341383	no	15.5335	14744
XLOC_000427	XLOC_000427	Tnnt2	chr1:135836385-135852261	chr1	135836385	135852261	d8 Nkx2-5 EmGFP	CLK	OK	7.22316	0.0936984	-6.26846	-3.18953	0.00345	0.0934274	no	7.12946	15876
XLOC_000428	XLOC_000428	Tmem9	chr1:136008218-136035030	chr1	136008218	136035030	d8 Nkx2-5 EmGFP	CLK	OK	9.28788	26.0167	1.48602	1.02582	0.33395	0.723312	no	16.7288	26812
XLOC_000429	XLOC_000429	Cacna1s	chr1:136052900-136119822	chr1	136052900	136119822	d8 Nkx2-5 EmGFP	CLK	OK	0	0.166991	inf	#NAME?	0.00335	0.0913312	no	0.166991	66922
XLOC_000430	XLOC_000430	Kif21b	chr1:136131376-136178014	chr1	136131376	136178014	d8 Nkx2-5 EmGFP	CLK	OK	0.115453	3.74305	5.01884	2.95642	0.02635	0.241196	no	3.6276	46638
XLOC_000431	XLOC_000431	Ddx59	chr1:136411915-136440220	chr1	136411915	136440220	d8 Nkx2-5 EmGFP	CLK	OK	2.67143	6.10009	1.19122	0.716104	0.4932	0.821853	no	3.42866	28305
XLOC_000432	XLOC_000432	Kif14	chr1:136466397-136531511	chr1	136466397	136531511	d8 Nkx2-5 EmGFP	CLK	OK	6.72331	6.32948	-0.0870845	-0.0685986	0.94805	0.986242	no	0.39383	65114
XLOC_000433	XLOC_000433	Zfp281	chr1:136598312-136633271	chr1	136598312	136633271	d8 Nkx2-5 EmGFP	CLK	OK	5.75626	17.2873	1.58651	1.20555	0.24145	0.651103	no	11.531	34959
XLOC_000434	XLOC_000434	Gm19705	chr1:136674685-136690870	chr1	136674685	136690870	d8 Nkx2-5 EmGFP	CLK	OK	0.633366	2.43845	1.94486	0.661682	0.45765	0.799697	no	1.80508	16185
XLOC_000435	XLOC_000435	Gm16880	chr1:136696107-136729735	chr1	136696107	136729735	d8 Nkx2-5 EmGFP	CLK	OK	0.0275177	2.11842	6.26649	2.75991	0.0354	0.255134	no	2.0909	33628
XLOC_000436	XLOC_000436	Mir181a-1	chr1:137966454-137966541	chr1	137966454	137966541	d8 Nkx2-5 EmGFP	CLK	NOTEST	0	0	0	0	1	1	no	0	87
XLOC_000437	XLOC_000437	Mir181b-1	chr1:137966638-137966718	chr1	137966638	137966718	d8 Nkx2-5 EmGFP	CLK	NOTEST	0	0	0	0	1	1	no	0	80
XLOC_000438	XLOC_000438	Atp6v1g3	chr1:138273737-138289462	chr1	138273737	138289462	d8 Nkx2-5 EmGFP	CLK	NOTEST	0	0	0	0	1	1	no	0	15725
XLOC_000439	XLOC_000439	Dennd1b	chr1:138963708-139176046	chr1	138963708	139176046	d8 Nkx2-5 EmGFP	CLK	OK	2.53443	1.81462	-0.481991	-0.31854	0.75485	0.938116	no	0.71981	212338
XLOC_000440	XLOC_000440	4933436E23Rik	chr1:139379451-139402852	chr1	139379451	139402852	d8 Nkx2-5 EmGFP	CLK	NOTEST	0	0	0	0	1	1	no	0	23401
XLOC_000441	XLOC_000441	Zbtb41	chr1:139422245-139453007	chr1	139422245	139453007	d8 Nkx2-5 EmGFP	CLK	OK	9.19646	1.61277	-2.51154	-1.71988	0.1066	0.436751	no	7.58369	30762
XLOC_000442	XLOC_000442	Aspm	chr1:139454772-139494088	chr1	139454772	139494088	d8 Nkx2-5 EmGFP	CLK	OK	13.2319	8.38196	-0.658665	-0.569785	0.5911	0.872745	no	4.84994	39316
XLOC_000443	XLOC_000443	F13b	chr1:139501706-139523756	chr1	139501706	139523756	d8 Nkx2-5 EmGFP	CLK	NOTEST	0	0.00916304	inf	0	1	1	no	0.00916304	22050
XLOC_000444	XLOC_000444	Kcnt2	chr1:140245734-140656402	chr1	140245734	140656402	d8 Nkx2-5 EmGFP	CLK	OK	0.00506694	0.361419	6.15642	2.52264	0.08665	0.385123	no	0.356352	410668
XLOC_000445	XLOC_000445	B3galt2	chr1:143598813-143702901	chr1	143598813	143702901	d8 Nkx2-5 EmGFP	CLK	NOTEST	0.00652735	0.010987	0.751231	0	1	1	no	0.00445965	104088
XLOC_000446	XLOC_000446	Glrx2	chr1:143739348-143749678	chr1	143739348	143749678	d8 Nkx2-5 EmGFP	CLK	OK	5.62935	6.047	0.103252	0.0692869	0.9463	0.985775	no	0.41765	10330
XLOC_000447	XLOC_000447	Uchl5	chr1:143777121-143807466	chr1	143777121	143807466	d8 Nkx2-5 EmGFP	CLK	OK	45.8155	47.0878	0.0395167	0.0317843	0.974	0.991564	no	1.2723	30345
XLOC_000448	XLOC_000448	Fam5c	chr1:146495665-146902472	chr1	146495665	146902472	d8 Nkx2-5 EmGFP	CLK	OK	0.372275	0.0212475	-4.13101	-1.90658	0.13515	0.496489	no	0.351028	406807
XLOC_000449	XLOC_000449	Ptgs2	chr1:150076660-150108012	chr1	150076660	150108012	d8 Nkx2-5 EmGFP	CLK	OK	198.756	0.299551	-9.37398	-5.70992	0.0054	0.119846	no	198.456	31352
XLOC_000450	XLOC_000450	Pdc	chr1:150319416-150346771	chr1	150319416	150346771	d8 Nkx2-5 EmGFP	CLK	NOTEST	0	0	0	0	1	1	no	0	27355
XLOC_000451	XLOC_000451	Tpr	chr1:150361310-150466165	chr1	150361310	150466165	d8 Nkx2-5 EmGFP	CLK	OK	50.5751	24.0516	-1.07229	-0.794204	0.36645	0.744603	no	26.5235	104855
XLOC_000452	XLOC_000452	C730036E19Rik	chr1:151138033-151144095	chr1	151138033	151144095	d8 Nkx2-5 EmGFP	CLK	NOTEST	0	0	0	0	1	1	no	0	6062
XLOC_000453	XLOC_000453	Ivns1abp	chr1:151343471-151364445	chr1	151343471	151364445	d8 Nkx2-5 EmGFP	CLK	OK	55.4653	45.522	-0.285023	-0.246647	0.8079	0.952264	no	9.9433	20974
XLOC_000454	XLOC_000454	1190005F20Rik	chr1:151428647-151458183	chr1	151428647	151458183	d8 Nkx2-5 EmGFP	CLK	OK	10.8993	20.2396	0.892938	0.698421	0.5145	0.833655	no	9.3403	29536
XLOC_000455	XLOC_000455	Fam129a	chr1:151571101-151721934	chr1	151571101	151721934	d8 Nkx2-5 EmGFP	CLK	OK	27.4886	3.84741	-2.83687	-2.12235	0.05755	0.294836	no	23.6412	150833
XLOC_000456	XLOC_000456	Edem3	chr1:151748949-151822328	chr1	151748949	151822328	d8 Nkx2-5 EmGFP	CLK	OK	10.2579	5.24008	-0.969069	-0.739868	0.46895	0.807023	no	5.01782	73379
XLOC_000457	XLOC_000457	Glt25d2	chr1:152399866-152510695	chr1	152399866	152510695	d8 Nkx2-5 EmGFP	CLK	NOTEST	0.031686	0.0305679	-0.0518263	0	1	1	no	0.0011181	110829
XLOC_000458	XLOC_000458	Apobec4	chr1:152516789-152766290	chr1	152516789	152766290	d8 Nkx2-5 EmGFP	CLK	NOTEST	0.00535216	0	#NAME?	0	1	1	no	0.00535216	249501
XLOC_000459	XLOC_000459	Arpc5	chr1:152766541-152775580	chr1	152766541	152775580	d8 Nkx2-5 EmGFP	CLK	OK	84.586	54.6053	-0.631377	-0.646781	0.6042	0.878356	no	29.9807	9039
XLOC_000460	XLOC_000460	Ncf2	chr1:152793989-152836990	chr1	152793989	152836990	d8 Nkx2-5 EmGFP	CLK	OK	0.0569742	0.623104	3.45109	1.64816	0.18225	0.580474	no	0.56613	43001
XLOC_000461	XLOC_000461	Nmnat2	chr1:152954772-153119444	chr1	152954772	153119444	d8 Nkx2-5 EmGFP	CLK	OK	2.33744	3.37601	0.530393	0.286276	0.76875	0.94259	no	1.03857	164672
XLOC_000462	XLOC_000462	-	chr1:153378763-153387200	chr1	153378763	153387200	d8 Nkx2-5 EmGFP	CLK	OK	0.00700574	0.78277	6.80391	2.69238	0.22875	0.638367	no	0.775764	8437
XLOC_000463	XLOC_000463	1700012A16Rik	chr1:153425208-153455314	chr1	153425208	153455314	d8 Nkx2-5 EmGFP	CLK	OK	0.136539	0.11023	-0.308798	-0.142123	0.898	0.974724	no	0.026309	30106
XLOC_000464	XLOC_000464	-	chr1:153586055-153587838	chr1	153586055	153587838	d8 Nkx2-5 EmGFP	CLK	OK	0.105062	0	#NAME?	#NAME?	0.04005	0.255134	no	0.105062	1783
XLOC_000465	XLOC_000465	Rgs8	chr1:153653036-153697665	chr1	153653036	153697665	d8 Nkx2-5 EmGFP	CLK	OK	0.007339	0.0967794	3.72104	1.78383	0.2425	0.652474	no	0.0894404	44629
XLOC_000466	XLOC_000466	Rgs16	chr1:153740352-153745468	chr1	153740352	153745468	d8 Nkx2-5 EmGFP	CLK	OK	5.40576	2.25835	-1.25923	-0.767466	0.495	0.823253	no	3.14741	5116
XLOC_000467	XLOC_000467	Rnasel	chr1:153749425-153764221	chr1	153749425	153764221	d8 Nkx2-5 EmGFP	CLK	OK	0.29093	0.0268825	-3.43593	-1.6116	0.16645	0.556022	no	0.264048	14796
XLOC_000468	XLOC_000468	Gm5531	chr1:153874344-153876871	chr1	153874344	153876871	d8 Nkx2-5 EmGFP	CLK	OK	0.0721396	0.495253	2.7793	1.64432	0.2796	0.679872	no	0.423113	2527
XLOC_000469	XLOC_000469	Teddm1	chr1:153891645-153893060	chr1	153891645	153893060	d8 Nkx2-5 EmGFP	CLK	NOTEST	0	0.0365773	inf	0	1	1	no	0.0365773	1415
[truncated: 29,203 more rows]

## Sheet: common annotated up
test_id	gene_id	gene	locus	chromosome	start	stop	sample_1	sample_2	status	value_1	value_2	log2(fold_change)	test_stat	p_value	q_value	significant	diff	Gene Length
[truncated: 1,039 more rows]

[truncated: 3 more sheets: common annotated down, common unannotated up, common unannotated down]
